# Supplementary material for: A Novel m7G-Related Genes-Based Signature with Prognostic Value and Predictive Ability to Select Patients Responsive to Personalized Treatment Strategies in Bladder Cancer
Source: MDPI journal article supplement (doi:10.3390/cancers14215346), 2022-10-29
Supplement: s1 [file s1]

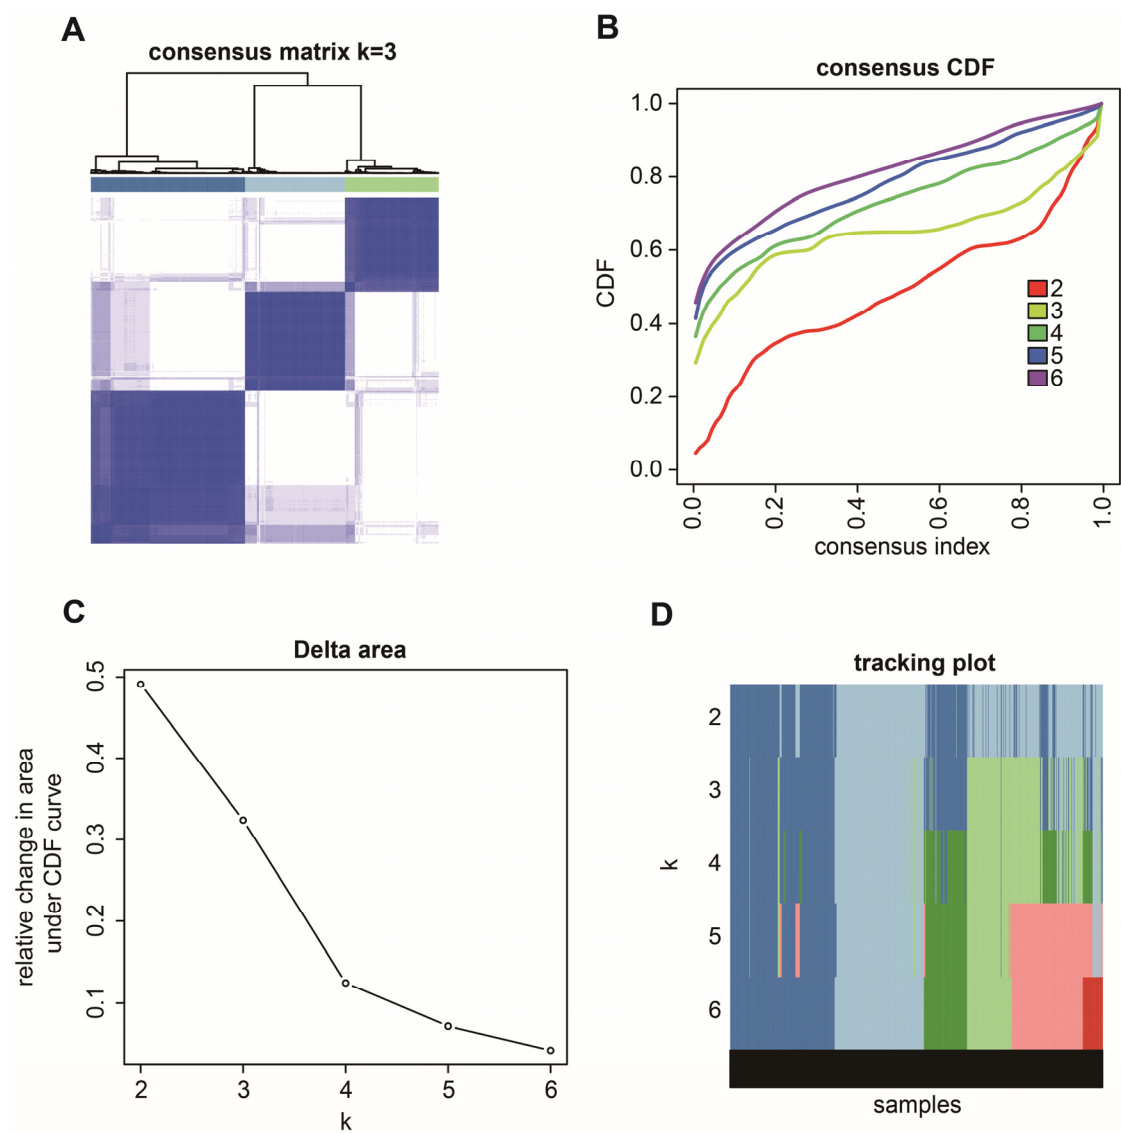

**Figure S1.** Consensus unsupervised clustering of 760 BLCA patients based on 18 m7G-related genes. **A** Consensus matrixes of 760 BLCA patients when k=3. **B** The correlation between consensus index and CDF when k=2-6. **C** The relative change under the CDF curve when k=2-6. **D** The tracking plot of 760 patients when k=2-6.

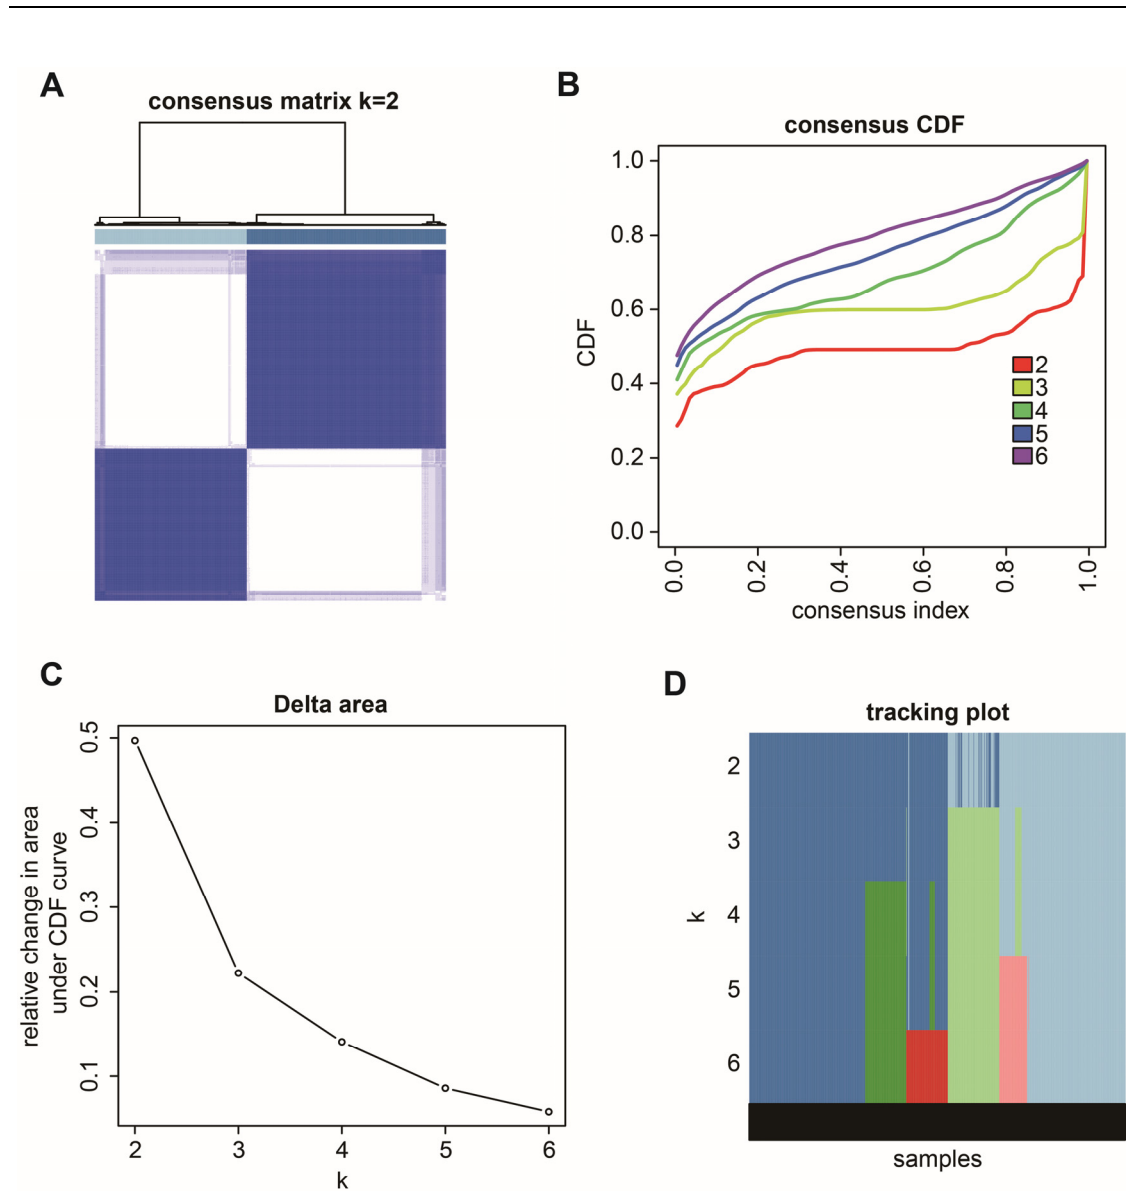

**Figure S2.** Consensus unsupervised clustering of 760 BLCA patients based on 1108 differentially expressed genes relevant to three m7G-related clusters. **A** Consensus matrixes of 760 BLCA patients when  $k=2$ . **B** The correlation between consensus index and CDF when  $k=2-6$ . **C** The relative change under the CDF curve when  $k=2-6$ . **D** The tracking plot of 760 patients when  $k=2-6$ .

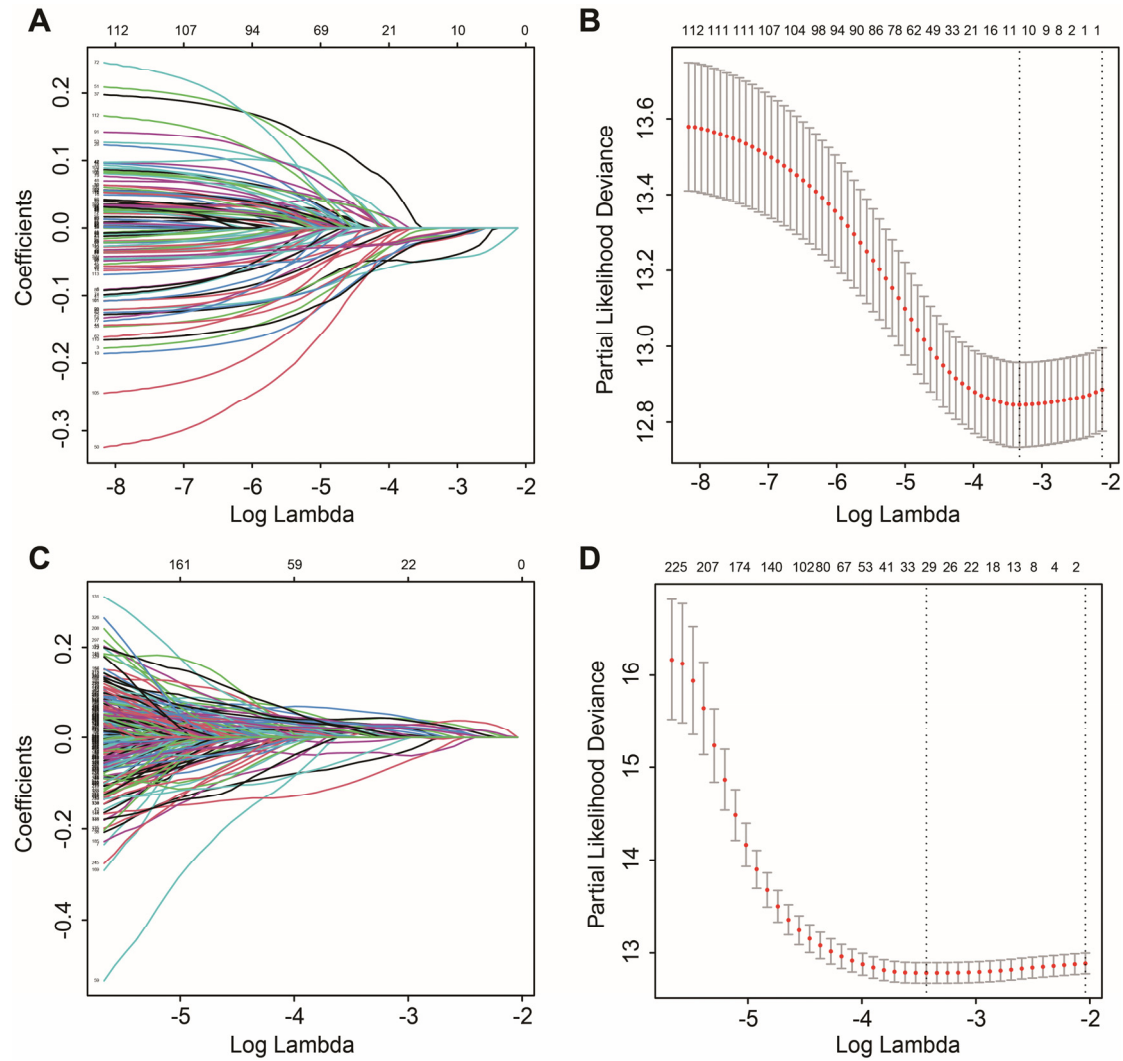

**Figure S3.** Selection of candidate genes via "LASSO" algorithm. **A** LASSO coefficient profiles of 114 prognostic genes in signature A. **B** Partial likelihood deviance of prognostic genes in signature A. **C** LASSO coefficient profiles of 340 prognostic genes in signature B. **D** Partial likelihood deviance of prognostic genes in signature B.
