# Supplementary material for: A Novel m7G-Related Genes-Based Signature with Prognostic Value and Predictive Ability to Select Patients Responsive to Personalized Treatment Strategies in Bladder Cancer
Source: Cancers (Basel). 2022 Oct 29;14(21):5346. doi: 10.3390/cancers14215346 (PMC9656096; doi:10.3390/cancers14215346)
Supplement: Supplementary file 1 [file cancers-14-05346-s001.zip]

Archive with 9 entries (9 files):
- Supplementary Figures.pdf
- Table S1.xlsx
- Table S2.xlsx
- Table S3.xlsx
- Table S4.xlsx
- Table S5.xlsx
- Table S6.xlsx
- Table S7.xlsx
- Table S8.xlsx
