# Supplementary material for: A Novel m7G-Related Genes-Based Signature with Prognostic Value and Predictive Ability to Select Patients Responsive to Personalized Treatment Strategies in Bladder Cancer
Source: Cancers (Basel). 2022 Oct 29;14(21):5346. doi: 10.3390/cancers14215346 (PMC9656096; doi:10.3390/cancers14215346)
Supplement: Supplementary file 1 [file cancers-14-05346-s001.zip › Table S1.xlsx]

## Sheet: 18 个m7G相关基因来源
Gene symbol	Gene description	Sourced gene sets/title	Database
CCNB1	Cyclin B1	m7G/7-Methylguanosine	GeneCards
CYFIP2	Cytoplasmic FMR1 interacting protein 2	GOMF_RNA_7_METHYLGUANOSINE_CAP_BINDING/7-Methylguanosine/m7G	GSEA/GeneCards
EIF4E3	Eukaryotic translation initiation factor 4E family member 3	GOMF_RNA_7_METHYLGUANOSINE_CAP_BINDING/7-Methylguanosine	GSEA/GeneCards
EIF4G1	Eukaryotic Translation Initiation Factor 4 Gamma 1	m7G/7-Methylguanosine	GeneCards
GEMIN5	Gem Nuclear Organelle Associated Protein 5	m7G/7-Methylguanosine	GeneCards
GTF2F2	General Transcription Factor IIF Subunit 2	7-Methylguanosine	GeneCards
JUN	Jun Proto-Oncogene, AP-1 Transcription Factor Subunit	m7G	GeneCards
LENG8	Leukocyte Receptor Cluster Member 8	7-Methylguanosine	GeneCards
MYC	MYC Proto-Oncogene, BHLH Transcription Factor	7-Methylguanosine	GeneCards
NR4A1	Nuclear Receptor Subfamily 4 Group A Member 1	7-Methylguanosine	GeneCards
NT5C3B	5'-Nucleotidase, Cytosolic IIIB	7-Methylguanosine	GeneCards
NUDT1	Nudix hydrolase 1	GOMF_M7G_5_PPPN_DIPHOSPHATASE_ACTIVITY/7-Methylguanosine	GSEA/GeneCards
NUDT11	Nudix hydrolase 11	GOMF_M7G_5_PPPN_DIPHOSPHATASE_ACTIVITY/m7G	GSEA/GeneCards
PNP	Purine Nucleoside Phosphorylase	7-Methylguanosine/m7G	GeneCards
PRKCB	Protein Kinase C Beta	7-Methylguanosine	GeneCards
RPS12	Ribosomal Protein S12	7-Methylguanosine	GeneCards
TNPO1	Transportin 1	7-Methylguanosine	GeneCards
WDR4	WD Repeat Domain 4	m7G/7-Methylguanosine/N7-Methylguanosine	GeneCards
