# Supplementary material for: A Novel m7G-Related Genes-Based Signature with Prognostic Value and Predictive Ability to Select Patients Responsive to Personalized Treatment Strategies in Bladder Cancer
Source: Cancers (Basel). 2022 Oct 29;14(21):5346. doi: 10.3390/cancers14215346 (PMC9656096; doi:10.3390/cancers14215346)
Supplement: Supplementary file 1 [file cancers-14-05346-s001.zip › Table S3.xlsx]

## Sheet: 218 VS 205差异表达基因
genesymbol	logFC	AveExpr	t	P.Value	adj.P.Val	B
RAI2	-1.37434	3.4001	-17.7789	3.26e-53	5.34e-49	110.181
CCNB1	1.28214	7.02928	17.2075	1.1e-50	8.98e-47	104.431
NR4A1	-1.87744	5.24182	-16.0326	1.54e-45	8.41e-42	92.7159
KLF2	-1.49106	5.7465	-15.6389	7.82e-44	3.21e-40	88.8325
PGM5	-2.24387	3.80584	-15.1595	9.04e-42	2.64e-38	84.1375
AQP1	-1.44916	6.4589	-15.1529	9.65e-42	2.64e-38	84.0729
CCNA2	1.17917	6.23644	15.0541	2.56e-41	5.99e-38	83.1105
CDC20	1.42582	7.53657	14.8674	1.6e-40	3.28e-37	81.2967
JAM2	-1.14548	3.22613	-14.7494	5.09e-40	9.14e-37	80.1548
AURKA	1.19244	6.37841	14.7401	5.57e-40	9.14e-37	80.065
KIF2C	1.11962	5.69931	14.5265	4.48e-39	6.68e-36	78.0048
NR4A3	-1.52484	3.5662	-14.4898	6.4e-39	8.76e-36	77.6513
TUBA1C	0.961647	9.11623	14.4722	7.6e-39	9.59e-36	77.4824
ACKR1	-2.23535	4.18153	-14.3483	2.53e-38	2.97e-35	76.2931
PTTG1	1.14455	6.92252	14.2537	6.33e-38	6.92e-35	75.3874
TCF21	-1.3074	3.19413	-14.2398	7.24e-38	7.43e-35	75.2541
NCAPG	1.10421	5.01478	14.2038	1.02e-37	9.89e-35	74.9111
HSPB6	-2.38896	4.26954	-14.1469	1.78e-37	1.62e-34	74.368
C7	-2.42581	3.73192	-14.1072	2.61e-37	2.25e-34	73.9892
FOXF1	-1.58826	4.66365	-14.0172	6.2e-37	5.08e-34	73.1329
SMOC2	-1.95245	4.94743	-13.9352	1.36e-36	1.07e-33	72.3536
CLEC3B	-1.48823	3.93223	-13.9024	1.87e-36	1.39e-33	72.0431
CCNB2	1.15593	6.47087	13.8902	2.1e-36	1.5e-33	71.9272
LDLRAD4	-0.764295	2.62874	-13.8509	3.06e-36	2.09e-33	71.5551
ITGA8	-1.33669	3.57286	-13.8168	4.24e-36	2.78e-33	71.2329
GEM	-1.66154	4.8783	-13.7789	6.09e-36	3.84e-33	70.875
SYNPO2	-1.97644	4.32308	-13.7396	8.87e-36	5.39e-33	70.5031
CEP55	1.11182	5.81246	13.7141	1.13e-35	6.63e-33	70.2625
MFAP4	-2.18158	6.18123	-13.6683	1.75e-35	9.9e-33	69.8316
DLGAP5	1.18153	5.70729	13.6376	2.35e-35	1.28e-32	69.5423
HMMR	1.09329	5.14387	13.6218	2.73e-35	1.44e-32	69.3936
KIF20A	1.17029	5.87043	13.6097	3.06e-35	1.57e-32	69.2799
RBPMS	-1.15554	5.15662	-13.6005	3.34e-35	1.66e-32	69.1935
CBX7	-0.902935	4.10758	-13.5595	4.93e-35	2.38e-32	68.8084
CDCA2	0.973609	4.30617	13.545	5.66e-35	2.65e-32	68.6723
TPX2	1.2178	7.16227	13.5369	6.11e-35	2.78e-32	68.5966
FAM107A	-1.24212	2.69224	-13.5315	6.43e-35	2.85e-32	68.5454
PDE1A	-0.936109	2.63396	-13.5161	7.44e-35	3.21e-32	68.4015
C1QTNF7	-0.866821	2.39568	-13.5123	7.72e-35	3.25e-32	68.3659
KNSTRN	0.816382	4.92843	13.5038	8.37e-35	3.43e-32	68.2857
ACACB	-1.08492	3.80673	-13.4989	8.77e-35	3.51e-32	68.24
ANLN	1.25601	6.24453	13.4881	9.71e-35	3.79e-32	68.1385
ADAMTS8	-1.20066	2.71059	-13.4634	1.23e-34	4.68e-32	67.9072
FBLN5	-1.35079	5.05203	-13.4405	1.52e-34	5.68e-32	67.6932
GAPDH	0.763415	11.7304	13.4282	1.71e-34	6.24e-32	67.5782
SELP	-1.41129	3.31622	-13.3793	2.72e-34	9.7e-32	67.1211
PRC1	1.05858	5.97784	13.3258	4.51e-34	1.57e-31	66.6218
PDK4	-1.89221	4.94606	-13.3009	5.71e-34	1.95e-31	66.3893
RHOB	-1.13669	8.0501	-13.2935	6.11e-34	2.05e-31	66.3212
CDK1	1.06455	6.06289	13.2807	6.9e-34	2.26e-31	66.2012
PBK	1.09223	4.90565	13.2774	7.12e-34	2.29e-31	66.1711
ADAM33	-1.16301	2.91971	-13.2366	1.04e-33	3.3e-31	65.7916
LMOD1	-2.10794	5.24521	-13.2265	1.15e-33	3.56e-31	65.697
ZMAT1	-0.913862	2.82263	-13.222	1.2e-33	3.64e-31	65.6552
CKAP2L	1.08695	4.92876	13.195	1.55e-33	4.61e-31	65.4051
ADCY4	-0.908852	3.73638	-13.1847	1.7e-33	4.99e-31	65.3094
SPARCL1	-1.63688	6.91921	-13.143	2.52e-33	7.25e-31	64.9224
TSPYL2	-0.938366	5.47341	-13.1372	2.66e-33	7.52e-31	64.8686
ADH1B	-1.79278	3.02143	-13.1335	2.75e-33	7.66e-31	64.834
TGFBR3	-1.58527	5.55114	-13.1307	2.83e-33	7.73e-31	64.8086
LMNB2	0.869601	7.46039	13.1233	3.03e-33	8.15e-31	64.74
A2M	-1.51966	8.90594	-13.0978	3.85e-33	1.02e-30	64.5032
EBF1	-0.999568	3.16535	-13.0808	4.51e-33	1.18e-30	64.3461
ADRA2A	-1.13255	3.07327	-13.0743	4.8e-33	1.23e-30	64.2856
ADCY5	-1.23317	2.76265	-13.0526	5.88e-33	1.48e-30	64.0852
ABCB4	-0.645536	2.58261	-13.0447	6.33e-33	1.57e-30	64.012
GNA14	-1.24204	3.31664	-13.0366	6.83e-33	1.67e-30	63.9377
CLIP3	-1.43201	4.80067	-13.0346	6.96e-33	1.68e-30	63.919
BUB1B	1.0367	5.77699	13.0156	8.31e-33	1.98e-30	63.7435
GPRASP1	-0.899203	3.67834	-12.953	1.49e-32	3.48e-30	63.1659
CENPE	0.947539	4.89692	12.9519	1.51e-32	3.48e-30	63.1555
CPXM2	-1.62891	4.08573	-12.9497	1.54e-32	3.5e-30	63.1354
FREM1	-0.910506	2.49344	-12.9277	1.89e-32	4.23e-30	62.9327
TMEM119	-1.45595	4.28449	-12.9265	1.91e-32	4.23e-30	62.9215
ORC1	0.939591	5.01026	12.9154	2.12e-32	4.58e-30	62.8201
LIMS2	-1.28341	3.93126	-12.9152	2.12e-32	4.58e-30	62.8181
TTK	1.12385	5.38329	12.8825	2.88e-32	6.13e-30	62.5169
PRELP	-1.63123	3.95034	-12.8752	3.08e-32	6.47e-30	62.4503
INMT	-1.14049	3.35175	-12.8504	3.88e-32	8.05e-30	62.2218
CENPA	1.03414	4.59262	12.8473	3.99e-32	8.18e-30	62.1935
DKC1	0.666948	7.25763	12.8361	4.43e-32	8.97e-30	62.0909
GNG7	-0.94011	2.66289	-12.8231	5e-32	1e-29	61.9716
CDCA4	0.821973	5.43067	12.8032	6.01e-32	1.19e-29	61.7894
KIF23	0.904689	5.10342	12.7826	7.28e-32	1.42e-29	61.6001
CYFIP2	-1.10751	4.52469	-12.7632	8.71e-32	1.68e-29	61.4226
BHMT2	-0.990487	2.48751	-12.7576	9.18e-32	1.75e-29	61.3709
CACNA1C	-1.02294	3.18609	-12.7097	1.43e-31	2.7e-29	60.9332
FGF7	-1.55922	3.67105	-12.7009	1.55e-31	2.89e-29	60.8527
PRR11	0.987398	5.22473	12.6914	1.69e-31	3.12e-29	60.7664
ADAMTS1	-1.53668	6.00339	-12.6898	1.72e-31	3.13e-29	60.751
CDCA3	0.86468	4.29777	12.6865	1.77e-31	3.2e-29	60.721
ASPM	1.1607	5.52162	12.6851	1.79e-31	3.2e-29	60.7088
PLK1	0.991253	5.74894	12.6804	1.88e-31	3.31e-29	60.6651
KIF11	0.967513	5.7317	12.6591	2.28e-31	3.98e-29	60.471
MEF2C	-0.919616	3.89358	-12.6519	2.44e-31	4.21e-29	60.4058
LDB2	-0.929436	3.80745	-12.6313	2.95e-31	5.04e-29	60.2181
APOD	-2.28908	5.64853	-12.6283	3.03e-31	5.13e-29	60.1905
SBSPON	-1.54244	3.43372	-12.6144	3.45e-31	5.77e-29	60.0641
SORBS1	-1.71034	4.15297	-12.6109	3.56e-31	5.9e-29	60.0322
BOC	-1.33194	3.44105	-12.5445	6.56e-31	1.08e-28	59.4278
DCHS1	-1.08466	4.04325	-12.5142	8.68e-31	1.41e-28	59.1524
ENO1	0.853813	11.1037	12.5007	9.82e-31	1.58e-28	59.0304
PRKCB	-1.10165	3.48241	-12.4853	1.13e-30	1.8e-28	58.8901
ABI3BP	-1.4519	4.19296	-12.4787	1.2e-30	1.9e-28	58.8303
CDCA8	1.0278	6.07156	12.472	1.28e-30	1.98e-28	58.7703
MYH11	-2.66475	6.61082	-12.4718	1.28e-30	1.98e-28	58.7686
RACGAP1	0.820405	5.85916	12.459	1.44e-30	2.21e-28	58.6524
GADD45B	-1.15602	6.33762	-12.435	1.79e-30	2.73e-28	58.4351
CACNB2	-0.925666	2.62919	-12.4288	1.9e-30	2.86e-28	58.3787
COL14A1	-1.4797	4.998	-12.424	1.98e-30	2.95e-28	58.3359
MYOCD	-1.07086	2.59084	-12.4235	1.99e-30	2.95e-28	58.3311
PODN	-1.54265	4.62256	-12.3935	2.62e-30	3.84e-28	58.0597
PARM1	-1.54484	5.20963	-12.3839	2.87e-30	4.16e-28	57.9728
CH25H	-1.25793	3.88072	-12.3493	3.93e-30	5.66e-28	57.6607
DTL	0.974318	5.10796	12.3438	4.13e-30	5.85e-28	57.6111
MAD2L1	0.972531	5.04515	12.3437	4.13e-30	5.85e-28	57.6105
FXYD6	-1.48179	3.50678	-12.3358	4.45e-30	6.24e-28	57.5385
CDCA5	1.04278	5.5224	12.3286	4.75e-30	6.6e-28	57.4743
SOBP	-0.984819	3.14408	-12.3206	5.11e-30	7.05e-28	57.4015
ASPA	-0.847776	2.40407	-12.3183	5.21e-30	7.13e-28	57.3816
DACT3	-1.23646	3.12112	-12.3167	5.29e-30	7.18e-28	57.3664
KIF4A	0.996685	5.7478	12.3066	5.81e-30	7.81e-28	57.2755
MRGPRF	-1.5535	4.24407	-12.3024	6.03e-30	8.04e-28	57.2382
NCAPD2	0.869755	7.22161	12.3008	6.12e-30	8.1e-28	57.2237
PKMYT1	0.857604	4.35589	12.2332	1.13e-29	1.49e-27	56.6157
RASL12	-1.2437	3.81937	-12.185	1.76e-29	2.29e-27	56.1832
CKS2	1.00678	7.76755	12.1795	1.84e-29	2.38e-27	56.1341
ZNF540	-0.634304	2.75393	-12.1666	2.07e-29	2.66e-27	56.0182
PLA1A	-1.20321	3.04819	-12.1562	2.28e-29	2.9e-27	55.9252
FRZB	-1.23199	4.4842	-12.144	2.55e-29	3.21e-27	55.8162
TRIP13	1.15317	5.64745	12.1209	3.14e-29	3.93e-27	55.6096
FOSB	-2.08014	5.96246	-12.1198	3.17e-29	3.94e-27	55.5998
DEPDC1	0.960507	4.21083	12.1128	3.38e-29	4.17e-27	55.537
C16orf89	-0.997674	2.34862	-12.1082	3.52e-29	4.31e-27	55.4961
PDE7B	-1.03475	3.46946	-12.0841	4.38e-29	5.31e-27	55.2807
CCT4	0.60544	7.94786	12.0836	4.4e-29	5.31e-27	55.2757
TNS1	-1.37954	5.18318	-12.0821	4.46e-29	5.34e-27	55.2631
AURKB	1.02119	5.92524	12.0808	4.51e-29	5.36e-27	55.2511
TPI1	0.730052	10.3682	12.0741	4.8e-29	5.66e-27	55.1909
PTGDS	-1.92203	5.37031	-12.064	5.25e-29	6.15e-27	55.1016
RNF150	-1.05017	2.89386	-12.06	5.44e-29	6.33e-27	55.066
NUSAP1	1.03384	6.4823	12.0393	6.56e-29	7.58e-27	54.8812
ELN	-1.53608	4.86415	-12.0152	8.16e-29	9.36e-27	54.6662
SPRY1	-1.08459	5.8007	-12.0072	8.77e-29	9.99e-27	54.5948
MRTO4	0.590686	6.5123	11.9847	1.07e-28	1.21e-26	54.3952
PRDM6	-0.828095	2.4736	-11.9807	1.11e-28	1.24e-26	54.3596
F10	-0.968196	2.71778	-11.9806	1.11e-28	1.24e-26	54.3588
CNRIP1	-1.05343	3.69343	-11.9769	1.15e-28	1.28e-26	54.3252
JAM3	-1.22738	5.0544	-11.9753	1.17e-28	1.28e-26	54.3113
TSPAN18	-1.05721	3.57798	-11.9749	1.17e-28	1.28e-26	54.3074
TICRR	0.851023	4.10614	11.9723	1.2e-28	1.31e-26	54.2844
POPDC2	-1.18082	3.30243	-11.9676	1.25e-28	1.35e-26	54.2433
CENPW	0.941992	5.98429	11.9517	1.45e-28	1.55e-26	54.1018
CDKN3	0.975776	5.54983	11.9504	1.46e-28	1.56e-26	54.0899
CSRNP1	-1.04989	6.18399	-11.9432	1.56e-28	1.65e-26	54.0264
SPON1	-1.65523	5.09037	-11.9262	1.82e-28	1.91e-26	53.8755
UBE2C	1.11476	7.45263	11.9204	1.92e-28	2e-26	53.8238
ABCB1	-0.820967	3.22873	-11.9112	2.08e-28	2.16e-26	53.7419
ZCCHC24	-1.07038	4.1748	-11.882	2.7e-28	2.79e-26	53.4837
AOC3	-1.44161	4.62859	-11.8711	2.98e-28	3.06e-26	53.387
FBXL7	-0.878544	3.18204	-11.865	3.15e-28	3.21e-26	53.3328
BUB1	0.914372	5.68629	11.8561	3.41e-28	3.45e-26	53.2547
ITIH5	-1.21977	3.5177	-11.8482	3.66e-28	3.68e-26	53.1846
PGK1	0.846847	9.32805	11.8059	5.35e-28	5.35e-26	52.8107
RUNX1T1	-0.655962	2.31064	-11.8007	5.6e-28	5.57e-26	52.7646
VIPR2	-0.500636	1.91006	-11.7599	8.06e-28	7.97e-26	52.4053
FHL1	-1.88241	4.93713	-11.7576	8.23e-28	8.05e-26	52.3847
CNN1	-2.33922	5.62902	-11.7575	8.24e-28	8.05e-26	52.3839
DCLK2	-0.936643	3.09132	-11.7439	9.3e-28	9.03e-26	52.264
CDC45	0.925872	5.36434	11.738	9.8e-28	9.46e-26	52.2128
ARHGAP11A	0.770869	4.30478	11.7179	1.17e-27	1.13e-25	52.0351
EIF5A	0.560595	8.87373	11.7126	1.23e-27	1.17e-25	51.9891
NEGR1	-0.957637	2.6165	-11.7087	1.27e-27	1.21e-25	51.9546
PAICS	0.743982	7.00149	11.6902	1.5e-27	1.41e-25	51.7922
DUSP1	-1.45134	8.69412	-11.6899	1.5e-27	1.41e-25	51.7895
NAA20	0.545892	7.78141	11.6872	1.54e-27	1.44e-25	51.7661
LYRM9	-0.580506	2.96646	-11.6781	1.67e-27	1.55e-25	51.6862
SLIT2	-1.26317	3.64842	-11.6642	1.89e-27	1.74e-25	51.5643
PDGFD	-1.04004	3.73708	-11.6553	2.05e-27	1.88e-25	51.4859
ECE2	0.647184	3.99518	11.6301	2.56e-27	2.32e-25	51.2654
RRM2	0.986449	6.19956	11.6301	2.56e-27	2.32e-25	51.2652
MKI67	0.932885	6.32114	11.6273	2.62e-27	2.37e-25	51.2407
RERGL	-0.832074	2.20118	-11.6219	2.75e-27	2.47e-25	51.1931
OGN	-1.52623	2.96285	-11.6163	2.89e-27	2.58e-25	51.1445
SLIT3	-1.33734	4.2105	-11.6147	2.93e-27	2.6e-25	51.1305
ZBTB16	-1.28829	3.28885	-11.6066	3.15e-27	2.78e-25	51.0594
KLHDC1	-0.662269	3.18719	-11.595	3.5e-27	3.07e-25	50.9574
FXYD1	-0.684935	2.275	-11.5857	3.8e-27	3.31e-25	50.8761
PYGM	-0.91928	2.86914	-11.5678	4.45e-27	3.86e-25	50.72
PRKD1	-1.06258	4.17292	-11.5646	4.58e-27	3.95e-25	50.6918
MYOM1	-1.1192	3.30244	-11.5574	4.87e-27	4.19e-25	50.6296
SYNM	-1.89047	5.19901	-11.5554	4.96e-27	4.24e-25	50.6116
PDZRN3	-1.2172	3.66992	-11.5535	5.05e-27	4.29e-25	50.5948
PRUNE2	-1.47995	3.07006	-11.5328	6.06e-27	5.13e-25	50.4143
TMEM100	-0.847929	2.3196	-11.5247	6.51e-27	5.45e-25	50.3442
PTGIS	-1.9753	4.74123	-11.5246	6.52e-27	5.45e-25	50.3429
PARD3B	-0.759746	3.39579	-11.5007	8.04e-27	6.7e-25	50.1351
BTG2	-1.29697	7.15099	-11.4845	9.29e-27	7.7e-25	49.9934
SKA3	0.808752	4.75902	11.4755	1.01e-26	8.29e-25	49.9152
CDC25C	0.756574	3.96913	11.4699	1.06e-26	8.66e-25	49.8668
FAM189A2	-0.840514	2.74094	-11.4674	1.08e-26	8.81e-25	49.845
PDZRN4	-1.0015	2.34881	-11.4665	1.09e-26	8.84e-25	49.837
CYP27A1	-1.26178	4.90129	-11.4657	1.1e-26	8.86e-25	49.8297
CRY2	-0.550965	4.90843	-11.4559	1.19e-26	9.6e-25	49.7452
CENPF	1.01961	5.91498	11.4486	1.27e-26	1.02e-24	49.6813
SPC25	0.83485	4.59623	11.4473	1.29e-26	1.03e-24	49.6704
S1PR1	-0.988836	4.30433	-11.4446	1.32e-26	1.05e-24	49.6472
LGI4	-0.800655	2.92984	-11.4409	1.36e-26	1.08e-24	49.6145
RAD51	0.697423	4.78605	11.4318	1.48e-26	1.16e-24	49.536
FOXM1	1.03082	5.76531	11.4279	1.53e-26	1.19e-24	49.5013
CCM2L	-0.655795	2.83112	-11.4223	1.61e-26	1.25e-24	49.4528
CFD	-1.52923	5.95324	-11.4191	1.65e-26	1.28e-24	49.4256
TROAP	0.930646	5.25357	11.4141	1.73e-26	1.33e-24	49.382
TOP2A	1.17661	7.48588	11.4139	1.73e-26	1.33e-24	49.3801
ITPR1	-0.912616	4.54314	-11.4118	1.76e-26	1.34e-24	49.362
CD200	-1.05903	3.98429	-11.3996	1.96e-26	1.49e-24	49.2567
NEK2	0.898671	5.00966	11.3984	1.98e-26	1.5e-24	49.2456
ZEB1	-1.02384	4.65612	-11.3972	2e-26	1.51e-24	49.2352
LYAR	0.666238	6.19051	11.3893	2.14e-26	1.61e-24	49.1674
RASGRP2	-0.942821	3.00152	-11.3748	2.44e-26	1.82e-24	49.0415
P2RX1	-1.43347	3.17522	-11.3743	2.45e-26	1.82e-24	49.0368
KIF14	0.904221	4.54521	11.3631	2.7e-26	1.99e-24	48.9401
LRRC2	-0.459872	1.96028	-11.3631	2.7e-26	1.99e-24	48.9399
EXO1	0.873562	4.79345	11.359	2.8e-26	2.05e-24	48.9046
CACNA1H	-1.25539	3.74015	-11.3552	2.9e-26	2.11e-24	48.8714
PLAC9	-1.32665	3.79328	-11.3448	3.17e-26	2.3e-24	48.7816
FILIP1	-0.919812	2.70103	-11.3394	3.32e-26	2.4e-24	48.7354
ZNF154	-0.638327	2.70798	-11.3366	3.41e-26	2.45e-24	48.711
SLC7A5	1.32052	7.84746	11.3334	3.5e-26	2.51e-24	48.6829
RASL11A	-0.980994	4.16798	-11.3308	3.58e-26	2.56e-24	48.6608
CKS1B	0.911897	6.18168	11.3261	3.73e-26	2.65e-24	48.6205
TMOD1	-1.21283	3.17538	-11.3209	3.91e-26	2.77e-24	48.5748
ITGA7	-1.2071	4.28332	-11.3194	3.96e-26	2.79e-24	48.5619
CXCL12	-1.45084	4.45407	-11.2938	4.95e-26	3.47e-24	48.3415
CSE1L	0.619677	7.98824	11.2902	5.11e-26	3.57e-24	48.3103
ZC3H12B	-0.510303	2.23658	-11.2788	5.65e-26	3.93e-24	48.2122
ZNF521	-1.00963	3.69312	-11.263	6.48e-26	4.49e-24	48.0761
NDC1	0.617747	5.35011	11.262	6.54e-26	4.51e-24	48.067
RHOJ	-0.928575	3.75462	-11.2606	6.62e-26	4.55e-24	48.0552
EBF3	-0.670687	2.49279	-11.2577	6.79e-26	4.64e-24	48.03
ID2	-1.12882	6.7873	-11.2533	7.06e-26	4.81e-24	47.9919
ERCC6L	0.857027	3.98718	11.2498	7.28e-26	4.93e-24	47.9623
DDR2	-1.17782	4.55946	-11.2421	7.78e-26	5.26e-24	47.8956
NAP1L3	-0.932769	2.91046	-11.2386	8.02e-26	5.4e-24	47.8659
WDR43	0.535417	6.53438	11.2343	8.33e-26	5.58e-24	47.8288
TCOF1	0.459193	4.94984	11.2306	8.6e-26	5.74e-24	47.7972
MELK	1.04243	5.69127	11.2286	8.76e-26	5.82e-24	47.7793
SCRG1	-1.16138	2.45837	-11.2268	8.89e-26	5.88e-24	47.7646
PNPLA7	-0.768922	3.11996	-11.2184	9.57e-26	6.31e-24	47.692
MCM10	0.915842	4.64146	11.2175	9.64e-26	6.33e-24	47.6843
WFDC1	-1.07478	3.43888	-11.2064	1.06e-25	6.94e-24	47.5893
BIRC5	0.830181	5.35699	11.1917	1.21e-25	7.84e-24	47.4628
IGF1	-0.879647	2.40966	-11.1916	1.21e-25	7.84e-24	47.4619
BOP1	0.755089	7.56866	11.1911	1.21e-25	7.84e-24	47.4576
OXER1	-0.851786	3.13318	-11.1868	1.26e-25	8.11e-24	47.4205
LDHA	0.902157	9.7347	11.171	1.45e-25	9.26e-24	47.2851
GYPC	-1.20214	4.72446	-11.1545	1.67e-25	1.06e-23	47.1439
KCNMA1	-0.920469	2.91974	-11.1506	1.73e-25	1.1e-23	47.1104
RAD54L	0.903019	5.18574	11.1312	2.04e-25	1.29e-23	46.9439
FSCN1	1.25796	8.41614	11.1234	2.19e-25	1.38e-23	46.8772
SCUBE2	-1.87862	4.44948	-11.1229	2.2e-25	1.38e-23	46.8728
COX7A1	-1.18178	4.8814	-11.1136	2.38e-25	1.49e-23	46.7933
PLN	-1.73482	4.13944	-11.111	2.43e-25	1.52e-23	46.7714
LRRN4CL	-0.848187	2.68814	-11.1096	2.46e-25	1.53e-23	46.7589
LMF1	-0.675493	3.64523	-11.1094	2.47e-25	1.53e-23	46.7576
ATP1B2	-0.76477	2.66637	-11.1074	2.51e-25	1.55e-23	46.7407
ARHGAP20	-0.582232	2.2776	-11.094	2.82e-25	1.73e-23	46.6256
ACTA2	-1.5668	9.35296	-11.0904	2.91e-25	1.78e-23	46.5956
ATP1A2	-1.41573	2.75832	-11.0875	2.98e-25	1.82e-23	46.5706
GPIHBP1	-0.917835	2.51564	-11.0871	2.99e-25	1.82e-23	46.5673
NEIL3	0.824802	3.81654	11.0768	3.27e-25	1.98e-23	46.4794
RFTN2	-0.614584	3.03444	-11.0739	3.36e-25	2.02e-23	46.4543
LDB3	-0.67668	2.25291	-11.0628	3.69e-25	2.22e-23	46.3596
EBNA1BP2	0.628286	7.56444	11.0608	3.76e-25	2.25e-23	46.3423
CYP2U1	-0.63013	3.1027	-11.0528	4.03e-25	2.4e-23	46.2747
ZFP36	-1.14673	8.9195	-11.0519	4.06e-25	2.41e-23	46.2662
PSMD14	0.581665	6.87253	11.0354	4.68e-25	2.77e-23	46.126
SGCA	-1.30946	2.96002	-11.0349	4.7e-25	2.78e-23	46.1215
POLD2	0.612004	7.63538	11.0176	5.46e-25	3.21e-23	45.9743
CHRD	-0.715472	2.65516	-11.0113	5.77e-25	3.38e-23	45.9206
PAMR1	-1.05295	4.03162	-11.0086	5.9e-25	3.44e-23	45.8981
PI16	-1.51488	2.67527	-11.0053	6.07e-25	3.53e-23	45.8694
JUND	-0.737033	8.562	-10.9991	6.4e-25	3.71e-23	45.8173
FAT4	-0.718927	2.73877	-10.9988	6.42e-25	3.71e-23	45.8148
MGP	-1.90352	7.97402	-10.9911	6.86e-25	3.95e-23	45.7493
CMSS1	0.620448	5.80153	10.9899	6.93e-25	3.98e-23	45.739
PGAM5	0.571568	5.90376	10.9888	7e-25	4e-23	45.7297
HJURP	0.882888	5.45249	10.9806	7.51e-25	4.28e-23	45.6597
CDC25A	0.786436	4.27648	10.9759	7.82e-25	4.44e-23	45.62
DEPDC1B	0.767458	4.3141	10.969	8.3e-25	4.7e-23	45.5613
PKDCC	-1.44575	3.53512	-10.9667	8.47e-25	4.77e-23	45.5416
TLE2	-1.35215	4.67954	-10.9558	9.3e-25	5.23e-23	45.4488
ABCA8	-0.984111	2.82737	-10.9456	1.02e-24	5.67e-23	45.3625
PLK4	0.730335	4.78725	10.9454	1.02e-24	5.67e-23	45.3612
LSAMP	-0.835535	2.90692	-10.9411	1.06e-24	5.87e-23	45.3244
RUVBL1	0.603772	6.15777	10.9384	1.08e-24	5.99e-23	45.3015
CENPN	0.759369	5.12072	10.9307	1.15e-24	6.38e-23	45.236
GFRA1	-0.824686	2.26812	-10.9261	1.2e-24	6.61e-23	45.1974
MND1	0.733156	4.14996	10.9173	1.29e-24	7.1e-23	45.1231
NCAM1	-1.22096	2.82582	-10.9104	1.37e-24	7.51e-23	45.0642
COA7	0.546736	5.30725	10.9074	1.41e-24	7.68e-23	45.0394
HLF	-0.694434	2.14724	-10.8987	1.52e-24	8.25e-23	44.9653
HAAO	-0.813126	3.49355	-10.8977	1.53e-24	8.3e-23	44.9566
CASQ2	-1.75803	3.36353	-10.8944	1.58e-24	8.5e-23	44.9291
LMO3	-1.10171	2.5466	-10.8898	1.64e-24	8.82e-23	44.8899
MMRN1	-1.02276	2.71008	-10.8849	1.71e-24	9.17e-23	44.8487
RAMP3	-0.957846	4.97001	-10.8704	1.94e-24	1.03e-22	44.7261
CTSG	-1.53405	3.41481	-10.8695	1.95e-24	1.04e-22	44.7185
UHRF1	0.897813	4.81038	10.8686	1.97e-24	1.04e-22	44.7109
GART	0.586466	6.57072	10.8653	2.02e-24	1.07e-22	44.6828
NPDC1	-1.05926	5.93127	-10.8627	2.07e-24	1.09e-22	44.6613
ITGA9	-0.831774	4.20546	-10.8606	2.1e-24	1.11e-22	44.6436
TCEAL2	-1.29425	2.76571	-10.8494	2.32e-24	1.21e-22	44.5489
ESPL1	0.800204	4.55274	10.8441	2.42e-24	1.27e-22	44.5041
SOX17	-0.842714	3.05818	-10.8416	2.48e-24	1.29e-22	44.4827
OLFML1	-0.909651	3.44439	-10.838	2.55e-24	1.33e-22	44.4525
GREM2	-0.658705	2.05125	-10.8329	2.67e-24	1.38e-22	44.4096
FNBP1	-0.80447	5.87676	-10.8312	2.71e-24	1.4e-22	44.3957
CCT3	0.550465	8.73447	10.8271	2.8e-24	1.44e-22	44.3612
OLFML3	-1.36417	5.1773	-10.8204	2.97e-24	1.52e-22	44.304
FAIM2	-0.717817	2.14941	-10.8177	3.04e-24	1.55e-22	44.2815
NR4A2	-1.24689	5.33478	-10.794	3.72e-24	1.89e-22	44.0824
MYL9	-1.54444	8.23184	-10.7933	3.74e-24	1.9e-22	44.0763
ANK2	-0.97628	2.95827	-10.7797	4.2e-24	2.13e-22	43.9614
ITM2A	-1.21239	4.7141	-10.7708	4.54e-24	2.29e-22	43.8865
CLDN5	-1.08126	3.68133	-10.7705	4.54e-24	2.29e-22	43.8846
CGNL1	-1.02949	3.74151	-10.7678	4.65e-24	2.33e-22	43.8613
KCNMB1	-1.29556	3.67132	-10.7597	4.99e-24	2.49e-22	43.7934
PTH1R	-0.849151	2.83884	-10.7596	4.99e-24	2.49e-22	43.7927
RGS5	-1.31413	5.35456	-10.7563	5.13e-24	2.55e-22	43.7651
KANK2	-1.01889	5.65564	-10.7551	5.18e-24	2.57e-22	43.7553
TMEM150C	-0.731419	3.22159	-10.7532	5.27e-24	2.6e-22	43.7394
MCM4	0.866054	7.16921	10.7413	5.83e-24	2.87e-22	43.6392
PDLIM3	-1.50653	4.83752	-10.7409	5.85e-24	2.87e-22	43.6361
FBXL22	-0.709735	2.50621	-10.7325	6.28e-24	3.08e-22	43.5655
OIP5	0.812721	4.35563	10.7317	6.33e-24	3.09e-22	43.5582
CYGB	-1.01699	4.91671	-10.7272	6.57e-24	3.2e-22	43.5206
NIP7	0.581348	6.18176	10.7051	7.93e-24	3.85e-22	43.3359
RPS6KA2	-0.822572	4.26807	-10.6998	8.29e-24	4.01e-22	43.2916
NUP37	0.551558	6.30792	10.6868	9.26e-24	4.47e-22	43.1826
RBPMS2	-1.37505	4.35071	-10.6756	1.02e-23	4.9e-22	43.0888
TCEAL7	-0.998098	3.21981	-10.6693	1.07e-23	5.15e-22	43.0364
KIF20B	0.722432	5.01578	10.6504	1.26e-23	6.03e-22	42.8784
PTCH2	-0.521276	2.33376	-10.6458	1.31e-23	6.25e-22	42.8401
MAGI2	-0.589327	2.5727	-10.6428	1.35e-23	6.4e-22	42.8143
STIL	0.786004	5.10143	10.6364	1.42e-23	6.74e-22	42.761
RHOQ	-0.60037	6.15248	-10.6354	1.43e-23	6.77e-22	42.7528
BYSL	0.5733	6.25512	10.6352	1.44e-23	6.77e-22	42.7509
PDE1B	-0.811742	2.58711	-10.6341	1.45e-23	6.81e-22	42.742
RASD1	-1.33638	4.29465	-10.6332	1.46e-23	6.84e-22	42.7342
UBE2T	0.776116	6.80482	10.6309	1.49e-23	6.95e-22	42.7157
CRISPLD2	-1.22497	6.0126	-10.6207	1.62e-23	7.56e-22	42.6307
RSPO3	-1.11923	3.02263	-10.6188	1.65e-23	7.66e-22	42.6147
TIMM8A	0.523349	4.5369	10.6144	1.71e-23	7.93e-22	42.5778
FOS	-1.4295	9.02814	-10.6117	1.75e-23	8.09e-22	42.5554
AKNA	-0.76921	4.80158	-10.6022	1.9e-23	8.74e-22	42.4764
EPHA3	-0.965674	3.41573	-10.592	2.07e-23	9.5e-22	42.3915
FANCE	0.721071	5.43755	10.5816	2.26e-23	1.03e-21	42.3049
CDT1	0.908764	5.50151	10.5767	2.35e-23	1.07e-21	42.264
CDCA7	1.10691	5.14748	10.5735	2.42e-23	1.1e-21	42.2373
PABPC5	-0.462136	2.08607	-10.5666	2.56e-23	1.16e-21	42.18
PREX2	-0.670301	3.18967	-10.5629	2.64e-23	1.2e-21	42.1489
ANGPTL1	-1.04569	2.49681	-10.5614	2.68e-23	1.21e-21	42.1367
TEK	-0.828933	3.64512	-10.5553	2.82e-23	1.27e-21	42.0859
CCT5	0.67635	8.11822	10.55	2.95e-23	1.32e-21	42.0417
FGF10	-0.834341	2.32648	-10.5494	2.96e-23	1.33e-21	42.0371
PSMD2	0.592705	8.47157	10.5432	3.12e-23	1.39e-21	41.9856
GSTM5	-1.04032	2.91328	-10.5417	3.16e-23	1.41e-21	41.9729
CCL19	-2.001	4.65459	-10.5366	3.3e-23	1.47e-21	41.9308
RCAN2	-0.989372	3.83525	-10.5342	3.36e-23	1.49e-21	41.9109
SKA1	0.708997	4.21614	10.5333	3.39e-23	1.5e-21	41.9037
PA2G4	0.456172	8.3379	10.531	3.46e-23	1.52e-21	41.8846
VSTM4	-0.71887	2.9894	-10.5277	3.55e-23	1.56e-21	41.8572
SELE	-1.36636	3.35426	-10.5165	3.9e-23	1.71e-21	41.7644
CPED1	-1.0769	3.85003	-10.5157	3.93e-23	1.72e-21	41.7573
CNTNAP1	-0.830463	4.06462	-10.5146	3.97e-23	1.73e-21	41.7483
PPAT	0.639238	4.92143	10.5141	3.99e-23	1.73e-21	41.7441
PBXIP1	-0.663613	6.87881	-10.4905	4.86e-23	2.11e-21	41.5487
ARHGEF6	-0.881407	4.996	-10.4899	4.89e-23	2.11e-21	41.5434
RGS2	-1.31721	7.00866	-10.4884	4.95e-23	2.14e-21	41.5312
SRL	-0.4865	1.94928	-10.4868	5.01e-23	2.16e-21	41.5181
EGR1	-1.30017	8.49594	-10.485	5.09e-23	2.19e-21	41.5033
TMEM130	-0.636733	2.18312	-10.4836	5.15e-23	2.21e-21	41.4912
XPNPEP2	-1.01353	2.61243	-10.4832	5.17e-23	2.21e-21	41.4878
FAM149A	-0.929922	3.04554	-10.4767	5.46e-23	2.33e-21	41.4343
COQ3	0.542845	5.4017	10.4629	6.12e-23	2.6e-21	41.3206
NOSTRIN	-0.692315	3.08673	-10.4629	6.12e-23	2.6e-21	41.3206
CKMT2	-0.605141	2.32228	-10.458	6.38e-23	2.7e-21	41.28
FAM110B	-0.823739	2.72856	-10.4546	6.57e-23	2.77e-21	41.2514
NFATC4	-0.867184	3.91852	-10.4405	7.39e-23	3.11e-21	41.1351
KIFC1	0.78006	5.33136	10.4267	8.3e-23	3.48e-21	41.0215
RBP5	-0.850712	3.52407	-10.4177	8.95e-23	3.74e-21	40.9471
CCNF	0.70001	5.12735	10.411	9.46e-23	3.95e-21	40.8916
CSDC2	-0.986873	2.71059	-10.406	9.86e-23	4.11e-21	40.8511
NRIP2	-0.492924	2.77549	-10.4009	1.03e-22	4.27e-21	40.8091
NME1	0.590455	7.49822	10.3996	1.04e-22	4.31e-21	40.798
SHROOM4	-0.781149	3.61221	-10.3973	1.06e-22	4.38e-21	40.7792
CNIH4	0.49766	6.50901	10.3918	1.11e-22	4.58e-21	40.7336
CPQ	-0.934328	5.09297	-10.391	1.12e-22	4.6e-21	40.7272
HPSE2	-1.11775	2.57381	-10.3864	1.16e-22	4.77e-21	40.6893
SSC5D	-1.25598	4.2588	-10.383	1.2e-22	4.89e-21	40.6615
MAP1A	-1.02834	3.9792	-10.3827	1.2e-22	4.89e-21	40.6586
C3orf70	-0.882889	3.04616	-10.372	1.31e-22	5.33e-21	40.5713
TNFSF12	-0.774191	4.64255	-10.3663	1.37e-22	5.58e-21	40.5241
PSRC1	0.69951	4.23212	10.3648	1.39e-22	5.64e-21	40.5116
LMCD1	-1.15143	4.82936	-10.362	1.42e-22	5.76e-21	40.489
SAMD11	-0.928748	2.88854	-10.3544	1.52e-22	6.12e-21	40.4266
NUF2	0.911168	5.32226	10.3525	1.54e-22	6.2e-21	40.411
TK1	0.893458	6.72218	10.3359	1.77e-22	7.11e-21	40.274
DSP	1.61028	7.88666	10.3311	1.84e-22	7.37e-21	40.235
UTP14A	0.451339	6.07369	10.3303	1.85e-22	7.4e-21	40.2287
CMA1	-1.04561	2.42247	-10.3276	1.9e-22	7.55e-21	40.2067
EMCN	-0.85269	3.27686	-10.3224	1.98e-22	7.87e-21	40.1637
ZFP2	-0.539495	2.52062	-10.3185	2.05e-22	8.11e-21	40.132
ZBTB20	-0.435822	2.64112	-10.3087	2.22e-22	8.78e-21	40.0511
MAP6	-0.707215	2.50047	-10.295	2.49e-22	9.81e-21	39.9395
ADAMTS10	-0.681172	3.00422	-10.2923	2.55e-22	1e-20	39.9168
TAGLN	-1.55482	8.68946	-10.2907	2.58e-22	1.01e-20	39.9041
PKP3	1.1038	6.3009	10.2863	2.67e-22	1.05e-20	39.8683
MAP3K12	-0.665112	3.82017	-10.2845	2.72e-22	1.06e-20	39.8531
FAM13C	-0.547939	2.57202	-10.2812	2.79e-22	1.09e-20	39.8264
NDC80	0.869775	5.74979	10.2731	2.98e-22	1.16e-20	39.7597
BNC2	-0.947508	3.04342	-10.2724	3e-22	1.16e-20	39.7544
MRPL37	0.535361	7.67533	10.2694	3.08e-22	1.19e-20	39.7299
CENPI	0.6706	4.12828	10.2666	3.15e-22	1.21e-20	39.707
KANK3	-0.604193	3.02053	-10.2665	3.15e-22	1.21e-20	39.7058
CYYR1	-0.786515	3.87948	-10.2636	3.23e-22	1.24e-20	39.6821
MS4A2	-0.729396	2.63086	-10.2631	3.24e-22	1.24e-20	39.6783
MTFR2	0.687478	4.37048	10.2624	3.26e-22	1.25e-20	39.6723
EGR2	-1.14423	4.72037	-10.259	3.36e-22	1.28e-20	39.6445
ARID5A	-0.706852	4.83809	-10.2576	3.39e-22	1.29e-20	39.6331
SORBS2	-1.04631	3.37352	-10.2533	3.52e-22	1.34e-20	39.5979
AOX1	-1.1851	3.16466	-10.2512	3.58e-22	1.36e-20	39.5813
HEPH	-1.04598	4.03584	-10.2505	3.6e-22	1.36e-20	39.5757
HSPD1	0.626027	8.8404	10.2428	3.84e-22	1.45e-20	39.5121
PLCB4	-0.960162	3.1849	-10.2339	4.13e-22	1.55e-20	39.4396
UCK2	0.667332	5.76807	10.2156	4.8e-22	1.8e-20	39.2908
RIC3	-0.541655	2.07759	-10.2118	4.96e-22	1.86e-20	39.2593
SOX5	-0.476525	2.34223	-10.2098	5.04e-22	1.88e-20	39.2434
MYO15B	-0.785725	3.80618	-10.1941	5.74e-22	2.14e-20	39.1152
NRXN2	-0.677382	2.40337	-10.1938	5.75e-22	2.14e-20	39.1133
RGS22	-0.245053	1.72567	-10.1923	5.83e-22	2.16e-20	39.1007
CHRDL1	-1.3003	2.9677	-10.1904	5.92e-22	2.19e-20	39.0852
STARD8	-0.715998	3.45392	-10.1895	5.96e-22	2.2e-20	39.0779
CCDC69	-0.942231	5.15974	-10.187	6.09e-22	2.24e-20	39.0577
EMILIN1	-1.36971	5.8392	-10.1706	6.97e-22	2.56e-20	38.9248
PDE5A	-0.916049	4.04664	-10.1669	7.18e-22	2.64e-20	38.8944
SHCBP1	0.720144	4.6837	10.1644	7.33e-22	2.69e-20	38.8744
NR3C2	-0.961564	3.11202	-10.1605	7.57e-22	2.77e-20	38.8422
CADM3	-0.977009	2.46249	-10.1546	7.95e-22	2.9e-20	38.7942
APOLD1	-0.917205	3.96594	-10.1535	8.02e-22	2.92e-20	38.7857
LPP	-0.740722	6.14122	-10.1466	8.49e-22	3.08e-20	38.7297
DES	-2.94211	6.915	-10.1445	8.64e-22	3.13e-20	38.7121
TMEM88	-0.786341	3.72791	-10.1385	9.08e-22	3.28e-20	38.6639
CCDC170	-0.485031	2.42104	-10.1357	9.29e-22	3.35e-20	38.6414
MRPL13	0.558282	6.48623	10.1261	1.01e-21	3.62e-20	38.5633
CREBRF	-0.508404	4.10548	-10.1244	1.02e-21	3.66e-20	38.5495
SPAG5	0.829102	6.22926	10.1189	1.07e-21	3.82e-20	38.5049
KCNA5	-0.639981	2.08589	-10.1181	1.07e-21	3.84e-20	38.4982
KCNJ8	-0.992897	4.06085	-10.1152	1.1e-21	3.92e-20	38.4745
AKAP6	-0.592153	2.33663	-10.11	1.15e-21	4.08e-20	38.4332
PRMT5	0.596468	6.63973	10.1034	1.21e-21	4.3e-20	38.3792
LRP8	0.882731	3.9906	10.1008	1.24e-21	4.39e-20	38.358
PKIG	-0.855339	5.59595	-10.1002	1.24e-21	4.4e-20	38.3533
ADCYAP1	-0.611961	2.02225	-10.0982	1.26e-21	4.46e-20	38.3374
HDC	-1.03351	3.2244	-10.0884	1.37e-21	4.83e-20	38.2577
ABCE1	0.508148	6.48355	10.0843	1.42e-21	4.97e-20	38.2251
STEAP2	-0.968276	4.06966	-10.0842	1.42e-21	4.97e-20	38.2241
ARHGEF15	-0.692861	3.27597	-10.0792	1.48e-21	5.17e-20	38.1835
OLFM1	-0.961669	2.90445	-10.0772	1.5e-21	5.25e-20	38.1672
YARS2	0.492536	5.76784	10.0716	1.57e-21	5.48e-20	38.1221
FAXDC2	-0.659393	2.88877	-10.0686	1.61e-21	5.61e-20	38.0976
ACTC1	-2.18311	3.9771	-10.0646	1.67e-21	5.78e-20	38.0661
EIF3B	0.507732	7.86164	10.0578	1.76e-21	6.1e-20	38.0106
SLC2A4	-0.935336	2.70747	-10.0563	1.78e-21	6.16e-20	37.9988
G3BP1	0.490211	7.44827	10.0528	1.84e-21	6.33e-20	37.9703
C3orf18	-0.604723	3.00772	-10.0436	1.98e-21	6.81e-20	37.8964
MITF	-0.702832	3.26794	-10.0396	2.05e-21	7.02e-20	37.8636
SERBP1	0.467121	7.38301	10.0195	2.41e-21	8.25e-20	37.7023
TCF4	-0.74361	3.8872	-10.0143	2.52e-21	8.6e-20	37.66
ACTG2	-2.07277	7.67789	-10.0116	2.57e-21	8.77e-20	37.6384
SARM1	-0.601189	3.14403	-10.009	2.63e-21	8.94e-20	37.6177
HSPA12B	-0.774479	3.49869	-10.0068	2.67e-21	9.08e-20	37.5999
ENTPD1	-0.699083	4.81431	-10.0042	2.73e-21	9.26e-20	37.5785
FCGRT	-0.841558	6.58247	-9.99687	2.9e-21	9.81e-20	37.5198
CPEB1	-0.423404	1.90644	-9.99506	2.94e-21	9.94e-20	37.5052
CCT6A	0.582631	8.33793	9.99419	2.96e-21	9.99e-20	37.4982
DOK6	-0.5905	2.18542	-9.98718	3.14e-21	1.06e-19	37.4419
CIT	0.688948	4.55036	9.98494	3.2e-21	1.07e-19	37.4239
SLC25A15	0.583481	4.62886	9.98327	3.24e-21	1.09e-19	37.4105
MEOX2	-0.976857	2.60214	-9.97839	3.37e-21	1.13e-19	37.3713
PDE1C	-0.602879	2.29311	-9.97768	3.39e-21	1.13e-19	37.3656
DSG3	2.63636	4.43057	9.97003	3.61e-21	1.2e-19	37.3042
RRM1	0.657694	7.63763	9.96999	3.61e-21	1.2e-19	37.3038
RNF112	-0.533133	2.3952	-9.96666	3.71e-21	1.23e-19	37.2771
SORCS1	-0.395153	1.87353	-9.96352	3.81e-21	1.26e-19	37.2519
NOP56	0.538873	7.97458	9.96031	3.91e-21	1.29e-19	37.2261
CDH11	-1.18951	4.85206	-9.95904	3.95e-21	1.3e-19	37.2159
SMARCD3	-0.882426	4.52591	-9.95365	4.13e-21	1.36e-19	37.1727
PPP1R12B	-0.892843	3.8007	-9.95207	4.18e-21	1.37e-19	37.16
HSPB2	-0.785275	2.88684	-9.93477	4.81e-21	1.58e-19	37.0213
HMGA1	0.769994	8.18922	9.93409	4.84e-21	1.58e-19	37.0159
SCARA5	-1.09932	2.7021	-9.93407	4.84e-21	1.58e-19	37.0158
E2F7	0.897343	4.04566	9.93042	4.98e-21	1.62e-19	36.9865
SNRPD1	0.523382	6.31176	9.92911	5.04e-21	1.64e-19	36.976
SHE	-0.542439	2.50901	-9.92787	5.09e-21	1.65e-19	36.9661
ZNF423	-0.697294	2.83746	-9.92432	5.24e-21	1.69e-19	36.9377
LGI2	-0.841097	2.8111	-9.92363	5.27e-21	1.7e-19	36.9322
ATAD2	0.779793	6.11894	9.92304	5.29e-21	1.71e-19	36.9274
ATP2A3	-0.993657	4.47394	-9.92093	5.38e-21	1.73e-19	36.9106
HK2	0.917674	6.81143	9.91609	5.6e-21	1.8e-19	36.8718
DLG2	-0.382066	2.1102	-9.91482	5.66e-21	1.81e-19	36.8616
RYR2	-0.753686	2.67702	-9.91081	5.85e-21	1.87e-19	36.8295
KRT6B	3.20857	5.02197	9.90992	5.89e-21	1.88e-19	36.8225
TRAF5	-0.640601	4.28876	-9.90835	5.96e-21	1.9e-19	36.8099
MTHFD1L	0.67375	5.8409	9.90319	6.22e-21	1.98e-19	36.7686
P2RY14	-0.654745	2.53156	-9.90209	6.27e-21	1.99e-19	36.7598
PPP1R14A	-1.19701	4.90042	-9.89944	6.41e-21	2.03e-19	36.7386
PLA2G5	-0.830928	2.50156	-9.89774	6.5e-21	2.05e-19	36.725
BRI3BP	0.623492	4.99356	9.89531	6.63e-21	2.09e-19	36.7056
ADAMTSL3	-0.678585	2.31789	-9.89265	6.77e-21	2.13e-19	36.6843
UBE2S	0.766905	6.39315	9.8822	7.37e-21	2.32e-19	36.6009
SLC2A1	1.31122	8.26201	9.88153	7.41e-21	2.33e-19	36.5956
HSPB7	-1.30072	3.10806	-9.8746	7.84e-21	2.46e-19	36.5402
NIPSNAP3B	-0.420101	2.42662	-9.87392	7.89e-21	2.46e-19	36.5348
ADAMTS9	-0.910226	3.70202	-9.87141	8.05e-21	2.51e-19	36.5148
TOMM40	0.50292	7.21289	9.86474	8.49e-21	2.64e-19	36.4615
NXPH3	-0.790917	2.56982	-9.86304	8.61e-21	2.68e-19	36.448
PLIN4	-1.33942	4.15638	-9.85194	9.42e-21	2.92e-19	36.3595
SOD3	-1.26484	4.95177	-9.85085	9.5e-21	2.94e-19	36.3508
SLC25A5	0.589955	10.032	9.84742	9.77e-21	3.02e-19	36.3235
ANXA2	0.820116	9.02798	9.84661	9.84e-21	3.03e-19	36.317
ATF3	-1.32551	6.27604	-9.84549	9.93e-21	3.06e-19	36.3081
CRYM	-1.08053	2.86343	-9.84245	1.02e-20	3.13e-19	36.2839
CNTN4	-0.594725	2.48129	-9.84117	1.03e-20	3.15e-19	36.2737
PKM	0.674746	9.34752	9.83564	1.07e-20	3.29e-19	36.2296
MOXD1	-1.21339	4.44541	-9.83462	1.08e-20	3.31e-19	36.2215
BORA	0.664292	4.72849	9.81736	1.25e-20	3.8e-19	36.0842
CCDC178	-0.330688	1.79608	-9.81709	1.25e-20	3.8e-19	36.082
CLDN11	-1.03692	3.23086	-9.81463	1.27e-20	3.87e-19	36.0625
PUS7	0.615153	5.48963	9.81455	1.27e-20	3.87e-19	36.0618
PRKAR2B	-0.893317	3.88166	-9.81299	1.29e-20	3.91e-19	36.0495
KLHL41	-0.686415	2.34131	-9.7926	1.52e-20	4.6e-19	35.8875
DOK5	-0.682907	2.45334	-9.78704	1.59e-20	4.8e-19	35.8433
POP1	0.575834	4.71017	9.78554	1.61e-20	4.85e-19	35.8314
DIXDC1	-0.857915	3.78971	-9.77798	1.71e-20	5.14e-19	35.7714
TACR1	-0.466871	2.01778	-9.76833	1.85e-20	5.55e-19	35.6949
SLC22A17	-0.873556	4.35618	-9.76802	1.85e-20	5.55e-19	35.6924
DACT1	-0.96778	3.55146	-9.7636	1.92e-20	5.74e-19	35.6574
PLA2G2A	-2.27973	5.77209	-9.76197	1.95e-20	5.81e-19	35.6445
CELF2	-0.747447	2.95994	-9.75489	2.06e-20	6.14e-19	35.5884
SEMA3G	-0.714881	3.05477	-9.74688	2.2e-20	6.54e-19	35.525
SHMT2	0.643729	7.45512	9.74268	2.27e-20	6.75e-19	35.4917
FEN1	0.730442	6.2397	9.74189	2.29e-20	6.78e-19	35.4855
KLF9	-0.996298	5.02626	-9.7347	2.43e-20	7.17e-19	35.4286
MATN2	-1.3108	5.09645	-9.7344	2.43e-20	7.17e-19	35.4262
GPBAR1	-0.646884	2.64862	-9.734	2.44e-20	7.18e-19	35.423
RSPO1	-0.384456	1.83003	-9.73186	2.48e-20	7.3e-19	35.4061
HSD17B6	-0.996975	3.66058	-9.72649	2.59e-20	7.6e-19	35.3637
PERP	1.20638	9.1506	9.72417	2.64e-20	7.73e-19	35.3453
VDAC1	0.449557	8.33546	9.7204	2.72e-20	7.96e-19	35.3155
AHCY	0.571439	8.11231	9.71981	2.73e-20	7.98e-19	35.3108
DAAM2	-0.79717	3.46798	-9.71556	2.83e-20	8.24e-19	35.2772
NUDT1	0.55647	6.40599	9.69989	3.21e-20	9.33e-19	35.1535
GPSM2	0.690945	5.24025	9.6975	3.27e-20	9.49e-19	35.1347
EGR3	-0.841634	3.38303	-9.69724	3.28e-20	9.5e-19	35.1326
TTLL12	0.631361	6.59743	9.69539	3.32e-20	9.62e-19	35.118
GMPS	0.517181	7.02111	9.69051	3.46e-20	9.99e-19	35.0796
RAMP2	-0.790384	5.32792	-9.68802	3.53e-20	1.02e-18	35.0599
ICA1L	-0.452172	2.6027	-9.68781	3.53e-20	1.02e-18	35.0582
CFAP69	-0.509067	2.88065	-9.68762	3.54e-20	1.02e-18	35.0567
SGCD	-0.724707	2.54085	-9.67255	3.99e-20	1.15e-18	34.9379
LIN9	0.551463	4.26821	9.66447	4.26e-20	1.22e-18	34.8743
IPO4	0.509292	4.50997	9.65736	4.51e-20	1.29e-18	34.8183
ZEB2	-0.838363	4.30386	-9.65402	4.63e-20	1.32e-18	34.792
NOC2L	0.459441	7.21749	9.65401	4.63e-20	1.32e-18	34.792
PTGFR	-0.741076	2.39808	-9.65342	4.65e-20	1.32e-18	34.7873
TBC1D1	-0.639855	5.48713	-9.65335	4.65e-20	1.32e-18	34.7867
GRPEL1	0.466914	6.3245	9.65316	4.66e-20	1.32e-18	34.7853
COLEC12	-1.1828	3.97733	-9.646	4.94e-20	1.4e-18	34.7289
CFP	-0.748316	2.75752	-9.64566	4.95e-20	1.4e-18	34.7263
CHRM2	-0.874852	2.32188	-9.6431	5.05e-20	1.42e-18	34.7061
GJA4	-0.880069	4.37624	-9.63729	5.29e-20	1.49e-18	34.6604
POU6F1	-0.51114	3.0494	-9.63239	5.5e-20	1.55e-18	34.6219
ANGPTL7	-0.638617	1.97201	-9.62945	5.63e-20	1.58e-18	34.5989
FLNC	-1.69643	5.22546	-9.62408	5.88e-20	1.65e-18	34.5567
PTGER3	-0.574971	2.16998	-9.61663	6.24e-20	1.74e-18	34.4982
FAM83A	1.84946	5.18055	9.6141	6.37e-20	1.78e-18	34.4783
SPATA6	-0.579735	3.17997	-9.60931	6.62e-20	1.84e-18	34.4407
PSD	-0.800601	2.92172	-9.60724	6.73e-20	1.87e-18	34.4245
PCP4	-2.15911	4.02449	-9.60272	6.97e-20	1.94e-18	34.3891
CLEC14A	-0.763908	4.53294	-9.59687	7.3e-20	2.02e-18	34.3432
EFCC1	-0.642761	2.63949	-9.59625	7.34e-20	2.03e-18	34.3383
PDZD4	-0.833227	2.63911	-9.59329	7.52e-20	2.08e-18	34.3151
NOLC1	0.520781	6.99346	9.58814	7.83e-20	2.16e-18	34.2748
RECK	-0.727221	3.62826	-9.58724	7.89e-20	2.17e-18	34.2677
FANCI	0.669844	6.17795	9.58647	7.94e-20	2.18e-18	34.2617
GATA5	-0.848547	2.18249	-9.58436	8.07e-20	2.21e-18	34.2451
EME1	0.627106	3.82861	9.58179	8.24e-20	2.26e-18	34.2251
RGS9	-0.662197	2.77182	-9.57881	8.43e-20	2.31e-18	34.2017
DCN	-1.47294	7.30398	-9.57668	8.58e-20	2.34e-18	34.1851
FBXO5	0.683446	4.7472	9.5751	8.69e-20	2.37e-18	34.1726
RNF180	-0.58793	2.86619	-9.57473	8.71e-20	2.37e-18	34.1698
GINS2	0.776684	5.4236	9.55954	9.83e-20	2.67e-18	34.0509
RANBP3L	-0.801543	2.20286	-9.54891	1.07e-19	2.9e-18	33.9679
DIAPH3	0.724914	4.41934	9.54761	1.08e-19	2.93e-18	33.9577
BEND5	-0.923799	3.31947	-9.54372	1.11e-19	3.01e-18	33.9273
TSHZ2	-0.869743	3.46465	-9.54198	1.13e-19	3.05e-18	33.9137
HDGF	0.539554	8.7522	9.54172	1.13e-19	3.05e-18	33.9116
DHH	-0.322379	1.96042	-9.54024	1.15e-19	3.08e-18	33.9001
DNAH1	-0.5442	3.47963	-9.53262	1.22e-19	3.27e-18	33.8406
FILIP1L	-1.0654	5.05071	-9.53072	1.24e-19	3.31e-18	33.8258
DSCC1	0.669572	4.78235	9.52266	1.32e-19	3.53e-18	33.7629
CSTF2	0.549033	6.19945	9.52027	1.34e-19	3.59e-18	33.7443
SMAD9	-0.795876	3.18656	-9.5127	1.43e-19	3.8e-18	33.6852
ECT2	0.731457	5.25792	9.51198	1.43e-19	3.82e-18	33.6796
WDR3	0.511527	5.31025	9.51025	1.45e-19	3.86e-18	33.6662
NOVA1	-0.551647	2.08771	-9.51017	1.45e-19	3.86e-18	33.6655
GARNL3	-0.597642	3.28555	-9.50807	1.48e-19	3.92e-18	33.6492
FLT3	-0.602441	2.37731	-9.50715	1.49e-19	3.94e-18	33.642
TBRG4	0.444602	6.38483	9.5031	1.54e-19	4.06e-18	33.6105
AHSA1	0.442533	8.1988	9.5004	1.57e-19	4.14e-18	33.5894
ORC6	0.670744	4.80848	9.49648	1.62e-19	4.27e-18	33.5589
MCM2	0.843145	6.22007	9.49409	1.65e-19	4.34e-18	33.5403
RAD51AP1	0.81757	4.97032	9.49292	1.67e-19	4.38e-18	33.5312
IGFBP5	-1.52104	7.15403	-9.48849	1.73e-19	4.53e-18	33.4967
KCNB1	-0.420118	1.80359	-9.4865	1.75e-19	4.59e-18	33.4812
CCT7	0.449149	8.39199	9.48081	1.83e-19	4.79e-18	33.4369
NOP2	0.523034	6.43888	9.47965	1.85e-19	4.83e-18	33.4279
ADRB3	-0.523549	1.88595	-9.47273	1.96e-19	5.09e-18	33.3741
PTGER2	-0.779452	3.04705	-9.47261	1.96e-19	5.09e-18	33.3732
KCNN2	-0.506195	2.13336	-9.45639	2.22e-19	5.78e-18	33.2472
IPPK	0.649759	3.88994	9.45429	2.26e-19	5.86e-18	33.2309
HABP4	-0.681394	4.53753	-9.45387	2.27e-19	5.87e-18	33.2276
LRRC32	-0.923131	4.73349	-9.44853	2.37e-19	6.12e-18	33.1862
SCN7A	-0.573813	2.09828	-9.44825	2.37e-19	6.12e-18	33.1839
ACTL6A	0.590068	7.32727	9.44019	2.53e-19	6.51e-18	33.1214
RGS20	0.890321	2.78255	9.43551	2.62e-19	6.75e-18	33.0852
CA9	1.90082	4.63148	9.43351	2.66e-19	6.84e-18	33.0696
ADORA2B	1.01705	4.76351	9.43186	2.7e-19	6.92e-18	33.0568
MERTK	-0.800507	5.18354	-9.42313	2.89e-19	7.4e-18	32.9892
MRPL51	0.453565	8.6324	9.41615	3.05e-19	7.81e-18	32.9351
IL3RA	-0.672146	4.14821	-9.41144	3.17e-19	8.09e-18	32.8987
THBS4	-1.23863	3.09975	-9.40969	3.21e-19	8.19e-18	32.8851
CENPO	0.529749	4.12693	9.40161	3.42e-19	8.71e-18	32.8226
PALM	-1.08455	3.69226	-9.39837	3.51e-19	8.92e-18	32.7975
AFF3	-0.73276	2.32242	-9.39805	3.52e-19	8.93e-18	32.7951
LCN6	-0.425217	1.77707	-9.39674	3.56e-19	9.01e-18	32.7849
MSRB3	-1.16747	4.5675	-9.39502	3.61e-19	9.1e-18	32.7717
TBX2	-1.37238	5.63056	-9.39494	3.61e-19	9.1e-18	32.771
LRRK2	-0.646968	3.21155	-9.39493	3.61e-19	9.1e-18	32.771
CILP	-1.50126	3.41413	-9.39096	3.72e-19	9.37e-18	32.7402
FBLN1	-1.31668	8.59381	-9.38025	4.05e-19	1.02e-17	32.6575
FRY	-0.940305	4.58344	-9.37906	4.09e-19	1.03e-17	32.6483
ZNF763	-0.56057	4.04747	-9.37515	4.22e-19	1.06e-17	32.6181
SFN	1.42512	9.62313	9.36739	4.48e-19	1.12e-17	32.5582
IGSF9B	-0.636546	2.32611	-9.36145	4.69e-19	1.17e-17	32.5124
IL20RB	1.69734	4.52829	9.35616	4.89e-19	1.22e-17	32.4716
PID1	-0.825169	3.01861	-9.3533	5e-19	1.25e-17	32.4495
ZNF25	-0.520791	4.06873	-9.35009	5.13e-19	1.28e-17	32.4248
SERPINF1	-1.29088	7.39556	-9.34698	5.26e-19	1.31e-17	32.4008
TTC28	-0.664882	3.54432	-9.34639	5.28e-19	1.31e-17	32.3962
RNF122	-0.692458	4.88911	-9.34517	5.33e-19	1.32e-17	32.3869
TXN	0.72144	10.008	9.33977	5.56e-19	1.37e-17	32.3453
CHRDL2	-1.55144	3.73416	-9.32803	6.1e-19	1.5e-17	32.2549
GAPT	-0.517058	2.18913	-9.3193	6.53e-19	1.61e-17	32.1877
CHAC2	0.605809	3.91382	9.31765	6.62e-19	1.63e-17	32.175
TXLNB	-0.416806	2.22457	-9.31694	6.65e-19	1.63e-17	32.1696
KCNE4	-0.864145	3.47504	-9.31257	6.88e-19	1.69e-17	32.1359
PPP1R14B	0.520394	8.39232	9.31211	6.91e-19	1.69e-17	32.1324
TBX5	-0.643145	2.48975	-9.3098	7.03e-19	1.72e-17	32.1146
ATP1A1	0.618796	9.04287	9.29209	8.08e-19	1.97e-17	31.9786
NFATC2	-0.634478	3.17204	-9.29093	8.15e-19	1.99e-17	31.9697
KCNH2	-0.920965	2.63972	-9.28628	8.45e-19	2.06e-17	31.9341
PMP22	-1.0825	6.36831	-9.28611	8.46e-19	2.06e-17	31.9328
SHC2	-0.726789	3.32941	-9.28102	8.81e-19	2.14e-17	31.8937
HRC	-0.504445	2.19218	-9.2763	9.14e-19	2.21e-17	31.8575
PIEZO2	-0.792009	3.13496	-9.27582	9.17e-19	2.22e-17	31.8538
GALNT15	-0.7718	2.56169	-9.27361	9.33e-19	2.25e-17	31.8368
CPA3	-1.32568	4.71462	-9.27357	9.33e-19	2.25e-17	31.8365
POLQ	0.705678	4.26105	9.26032	1.03e-18	2.49e-17	31.735
FES	-0.738562	4.83951	-9.25723	1.06e-18	2.55e-17	31.7114
GINS3	0.618297	4.29282	9.25639	1.07e-18	2.56e-17	31.705
CYCS	0.471109	7.08692	9.25001	1.12e-18	2.69e-17	31.6561
PLP1	-0.697709	2.33743	-9.24973	1.12e-18	2.69e-17	31.654
CC2D2B	-0.219132	1.89774	-9.24879	1.13e-18	2.71e-17	31.6468
ACBD4	-0.597841	4.12995	-9.24429	1.17e-18	2.8e-17	31.6123
NBEA	-0.909156	3.35048	-9.24363	1.18e-18	2.81e-17	31.6073
ANO5	-0.678183	2.2884	-9.24144	1.2e-18	2.85e-17	31.5905
DUSP7	0.906982	5.31933	9.22843	1.33e-18	3.15e-17	31.491
GTF2H3	0.503675	5.48816	9.22153	1.4e-18	3.32e-17	31.4384
ECSCR	-0.733509	3.86812	-9.21407	1.48e-18	3.51e-17	31.3814
STAT5A	-0.63455	5.45961	-9.21384	1.49e-18	3.52e-17	31.3796
SSRP1	0.487731	8.1593	9.20975	1.53e-18	3.62e-17	31.3484
MS4A1	-1.17457	3.00456	-9.20204	1.63e-18	3.84e-17	31.2896
MICAL1	-0.719153	5.9999	-9.20029	1.65e-18	3.89e-17	31.2763
TSPAN32	-0.463638	2.16659	-9.19978	1.66e-18	3.9e-17	31.2723
CCR4	-0.762467	3.04051	-9.19936	1.66e-18	3.91e-17	31.2691
TIE1	-0.716846	3.91579	-9.19875	1.67e-18	3.92e-17	31.2645
NKRF	0.404129	5.22311	9.1944	1.73e-18	4.05e-17	31.2313
COL4A4	-0.73902	2.42937	-9.19023	1.78e-18	4.17e-17	31.1995
LMNB1	0.695892	6.50029	9.18654	1.84e-18	4.29e-17	31.1715
FERMT2	-1.00874	5.64917	-9.18641	1.84e-18	4.29e-17	31.1704
SFXN1	0.465716	5.76464	9.17851	1.95e-18	4.55e-17	31.1102
TXNDC17	0.553445	7.43914	9.17807	1.96e-18	4.56e-17	31.1069
DUSP2	-1.14729	5.22401	-9.16986	2.09e-18	4.85e-17	31.0444
XPO5	0.491196	6.3054	9.16494	2.17e-18	5.03e-17	31.007
STAT5B	-0.439626	6.3499	-9.16107	2.24e-18	5.18e-17	30.9776
SNRPG	0.430932	8.45802	9.1583	2.28e-18	5.28e-17	30.9565
GJB2	1.7917	7.8023	9.1582	2.29e-18	5.28e-17	30.9557
INCENP	0.563313	5.23024	9.15025	2.43e-18	5.61e-17	30.8953
EIF4G1	0.44219	8.53834	9.14171	2.6e-18	5.98e-17	30.8304
NCALD	-0.792773	3.47579	-9.14073	2.62e-18	6.02e-17	30.823
CKAP2	0.66759	5.72566	9.13825	2.67e-18	6.13e-17	30.8042
HPRT1	0.592496	7.31957	9.1345	2.74e-18	6.3e-17	30.7757
ELANE	-0.362815	1.81861	-9.13288	2.78e-18	6.37e-17	30.7634
TACC1	-0.886245	6.37302	-9.13244	2.79e-18	6.38e-17	30.76
PSMB7	0.4913	8.66027	9.12804	2.88e-18	6.59e-17	30.7267
NSDHL	0.490633	6.93757	9.12625	2.92e-18	6.67e-17	30.7131
S100A16	1.06394	8.80725	9.1246	2.96e-18	6.75e-17	30.7006
CD79B	-1.03984	3.68304	-9.11823	3.11e-18	7.08e-17	30.6523
EIF2S1	0.457324	6.55963	9.1177	3.12e-18	7.1e-17	30.6483
TACR2	-0.880575	2.45658	-9.11325	3.23e-18	7.34e-17	30.6146
FOXP1	-0.586226	5.02952	-9.10672	3.4e-18	7.71e-17	30.5651
GPR183	-1.13224	5.19184	-9.10642	3.41e-18	7.71e-17	30.5628
EML1	-0.768631	4.07315	-9.09967	3.59e-18	8.11e-17	30.5117
NETO2	0.965497	4.58196	9.09621	3.69e-18	8.32e-17	30.4855
RGL1	-0.73137	4.72588	-9.09551	3.71e-18	8.35e-17	30.4802
UPK3A	-2.19478	4.60791	-9.0939	3.75e-18	8.45e-17	30.468
THSD7A	-0.633924	2.62041	-9.08988	3.87e-18	8.7e-17	30.4376
WRNIP1	0.450667	6.67954	9.08901	3.9e-18	8.75e-17	30.431
BCL2L12	0.507107	5.47864	9.08789	3.93e-18	8.81e-17	30.4226
BANK1	-0.776192	3.33312	-9.08728	3.95e-18	8.84e-17	30.4179
MTBP	0.53907	3.89932	9.08248	4.1e-18	9.16e-17	30.3816
PER1	-0.8122	5.03178	-9.08211	4.11e-18	9.17e-17	30.3788
AMMECR1	0.594598	4.56498	9.08123	4.14e-18	9.22e-17	30.3722
INTS7	0.467535	5.11793	9.07996	4.18e-18	9.3e-17	30.3626
PHYHIP	-0.709796	2.55575	-9.07893	4.21e-18	9.36e-17	30.3548
TACC3	0.734828	6.29203	9.07541	4.33e-18	9.61e-17	30.3282
IQGAP3	0.859874	5.89583	9.07308	4.4e-18	9.77e-17	30.3106
EDNRB	-0.984316	4.01203	-9.07265	4.42e-18	9.78e-17	30.3074
GATA6	-0.902678	3.8376	-9.07117	4.47e-18	9.88e-17	30.2962
RERG	-0.846884	3.17821	-9.0696	4.52e-18	9.99e-17	30.2843
GNAL	-0.639505	2.70226	-9.06826	4.57e-18	1.01e-16	30.2742
WDHD1	0.594072	4.52961	9.06642	4.64e-18	1.02e-16	30.2603
RAB37	-0.526618	2.38538	-9.06122	4.82e-18	1.06e-16	30.221
ABCC9	-0.663754	2.96379	-9.06107	4.83e-18	1.06e-16	30.2199
PTPRM	-0.965633	5.80024	-9.0591	4.9e-18	1.08e-16	30.205
AIMP2	0.502178	6.5103	9.05736	4.97e-18	1.09e-16	30.1919
VWA5A	-0.85917	4.73754	-9.05449	5.08e-18	1.11e-16	30.1702
ZNF385D	-0.538658	2.10918	-9.05332	5.13e-18	1.12e-16	30.1614
ASB5	-0.8434	2.11176	-9.05212	5.17e-18	1.13e-16	30.1524
TSPAN2	-1.05626	4.0355	-9.04818	5.33e-18	1.16e-16	30.1226
TDRD10	-0.444096	2.10607	-9.04625	5.41e-18	1.18e-16	30.1081
EMC1	0.434411	5.8479	9.04543	5.45e-18	1.18e-16	30.1019
PLEK2	1.10407	6.21501	9.04423	5.5e-18	1.19e-16	30.0929
PDE2A	-0.767399	3.34391	-9.0437	5.52e-18	1.2e-16	30.0889
TTC21A	-0.510841	3.24652	-9.03951	5.7e-18	1.23e-16	30.0573
F12	0.91162	3.89579	9.03842	5.75e-18	1.24e-16	30.049
SYTL2	-0.906037	4.32922	-9.03667	5.82e-18	1.26e-16	30.0359
TFAP2A	1.13707	5.39878	9.03468	5.91e-18	1.28e-16	30.0208
RASGRF2	-0.557286	3.08109	-9.02946	6.16e-18	1.33e-16	29.9815
NEXN	-1.05434	4.83485	-9.02823	6.21e-18	1.34e-16	29.9723
TMEM8B	-0.525387	4.21136	-9.02661	6.29e-18	1.35e-16	29.9601
TGM1	1.57273	3.99179	9.02018	6.61e-18	1.42e-16	29.9117
MRPS22	0.368234	6.40006	9.01859	6.69e-18	1.43e-16	29.8997
GRPEL2	0.487131	5.10423	9.01773	6.73e-18	1.44e-16	29.8933
HTR2A	-0.414112	2.16139	-9.01694	6.77e-18	1.45e-16	29.8873
PSMC1	0.431557	5.68701	9.01223	7.02e-18	1.5e-16	29.8519
ELMO1	-0.698134	3.78482	-9.00915	7.19e-18	1.53e-16	29.8287
KRT14	3.17451	7.07758	8.99616	7.94e-18	1.69e-16	29.7311
SPRR1B	2.5854	5.74423	8.99281	8.15e-18	1.73e-16	29.7059
LDLRAD2	-0.326953	2.17716	-8.99208	8.19e-18	1.74e-16	29.7004
CHEK1	0.618912	4.53719	8.98956	8.35e-18	1.77e-16	29.6815
GTPBP4	0.502789	6.99623	8.9889	8.39e-18	1.78e-16	29.6766
SLC25A42	-0.458296	3.45119	-8.98578	8.6e-18	1.82e-16	29.6531
KRT6C	2.37547	3.77247	8.981	8.92e-18	1.88e-16	29.6173
ME3	-0.784988	4.5446	-8.9808	8.93e-18	1.88e-16	29.6157
RAB9B	-0.680531	2.64969	-8.97801	9.12e-18	1.92e-16	29.5948
CCND2	-1.05411	4.91124	-8.97615	9.25e-18	1.94e-16	29.5809
LRFN5	-0.609369	2.13603	-8.97608	9.26e-18	1.94e-16	29.5804
TCP1	0.518192	7.90811	8.97414	9.4e-18	1.97e-16	29.5658
ARHGEF25	-0.887646	4.67557	-8.9657	1e-17	2.1e-16	29.5025
CACNB4	-0.409565	1.95965	-8.96412	1.01e-17	2.12e-16	29.4906
CD34	-0.693166	4.61177	-8.96235	1.03e-17	2.15e-16	29.4774
PPIA	0.614204	8.25108	8.95992	1.05e-17	2.19e-16	29.4592
KCND3	-0.758093	3.01925	-8.95906	1.05e-17	2.2e-16	29.4527
EGFR	1.07189	6.34077	8.95863	1.06e-17	2.2e-16	29.4496
PDSS1	0.500278	4.92402	8.95728	1.07e-17	2.22e-16	29.4394
PLIN1	-0.835628	2.33226	-8.95469	1.09e-17	2.26e-16	29.42
FCN1	-0.823912	3.03136	-8.95358	1.1e-17	2.28e-16	29.4117
WDR4	0.480258	5.14797	8.95112	1.12e-17	2.32e-16	29.3933
CXCR4	-1.07111	6.61773	-8.94878	1.14e-17	2.36e-16	29.3758
EFEMP2	-0.916537	6.16501	-8.94835	1.14e-17	2.36e-16	29.3725
PRKG1	-0.722534	3.41898	-8.94722	1.15e-17	2.38e-16	29.3641
CYSLTR1	-0.605344	2.67394	-8.94352	1.19e-17	2.45e-16	29.3364
CCDC80	-1.1964	5.21979	-8.94276	1.19e-17	2.46e-16	29.3307
CALCOCO1	-0.477057	5.36914	-8.94255	1.2e-17	2.46e-16	29.3292
SLC7A1	0.764599	6.18097	8.93398	1.28e-17	2.62e-16	29.2651
ID4	-1.14475	4.16824	-8.92876	1.33e-17	2.72e-16	29.226
GAS7	-0.832197	3.63219	-8.92707	1.34e-17	2.75e-16	29.2134
MMS22L	0.456199	3.45886	8.9266	1.35e-17	2.76e-16	29.2099
ADHFE1	-0.723544	3.5286	-8.92221	1.4e-17	2.85e-16	29.1771
SMC4	0.706611	5.99677	8.91726	1.45e-17	2.96e-16	29.1401
HIF3A	-0.67971	2.16181	-8.90948	1.54e-17	3.13e-16	29.082
PGAM1	0.589224	5.44696	8.89807	1.68e-17	3.41e-16	28.9969
GHR	-0.714133	2.77008	-8.89495	1.72e-17	3.49e-16	28.9737
IL1R1	-0.826283	5.87581	-8.89427	1.73e-17	3.5e-16	28.9686
METTL7A	-1.2449	6.04002	-8.89362	1.73e-17	3.52e-16	28.9638
DMGDH	-0.321815	2.04851	-8.89091	1.77e-17	3.58e-16	28.9435
HMGB3	0.69944	6.22389	8.88918	1.79e-17	3.63e-16	28.9307
PDGFRA	-0.97785	4.91919	-8.88538	1.85e-17	3.73e-16	28.9023
MYRIP	-0.361626	1.86068	-8.88349	1.87e-17	3.78e-16	28.8883
ATAD3A	0.51662	6.3908	8.88194	1.89e-17	3.82e-16	28.8767
CIRBP	-0.521198	7.54138	-8.87416	2.01e-17	4.04e-16	28.8188
ABCA9	-0.77919	2.91686	-8.87241	2.04e-17	4.09e-16	28.8057
SNRPC	0.472165	7.48235	8.87096	2.06e-17	4.13e-16	28.795
AUNIP	0.662043	4.22727	8.86659	2.13e-17	4.27e-16	28.7624
MRPL14	0.47254	7.17723	8.86626	2.13e-17	4.27e-16	28.76
RFC4	0.643871	6.36469	8.86586	2.14e-17	4.28e-16	28.757
TBC1D9	-0.720289	5.90059	-8.86495	2.15e-17	4.31e-16	28.7502
PSMB1	0.411109	9.27847	8.86453	2.16e-17	4.31e-16	28.7471
URB2	0.479619	4.4579	8.86232	2.2e-17	4.38e-16	28.7307
KLRG1	-0.517493	2.53627	-8.86041	2.23e-17	4.44e-16	28.7165
STRAP	0.488713	8.30634	8.85869	2.26e-17	4.49e-16	28.7037
KCNAB1	-0.429092	2.28347	-8.85855	2.26e-17	4.49e-16	28.7026
MEIS1	-0.683994	4.03809	-8.85488	2.32e-17	4.61e-16	28.6754
REM1	-0.608453	2.48851	-8.85403	2.34e-17	4.64e-16	28.669
CTSO	-0.715717	5.40367	-8.85364	2.35e-17	4.64e-16	28.6662
FHL5	-0.60464	2.49271	-8.8522	2.37e-17	4.69e-16	28.6554
MYO19	0.487127	4.50684	8.84589	2.49e-17	4.91e-16	28.6086
MPZ	-0.664201	2.76945	-8.84572	2.49e-17	4.91e-16	28.6073
BTNL9	-0.775129	2.49203	-8.84318	2.54e-17	5e-16	28.5885
TMEM132C	-0.439669	1.90379	-8.83897	2.62e-17	5.16e-16	28.5573
PSMB5	0.48084	8.08979	8.83256	2.75e-17	5.41e-16	28.5096
CDC6	0.683012	5.44641	8.83223	2.76e-17	5.41e-16	28.5072
ENPP2	-0.974426	4.61634	-8.83213	2.76e-17	5.41e-16	28.5064
C2CD4B	-0.781301	2.72764	-8.82624	2.89e-17	5.65e-16	28.4628
BRCA1	0.575729	4.62702	8.82506	2.91e-17	5.69e-16	28.4541
KPNA2	0.589712	7.46264	8.82192	2.98e-17	5.82e-16	28.4307
NUP205	0.522435	6.77984	8.81452	3.15e-17	6.15e-16	28.3759
RGS11	-0.801137	2.75961	-8.81167	3.22e-17	6.28e-16	28.3548
PSMG1	0.547288	6.36542	8.80411	3.41e-17	6.64e-16	28.2988
RALGPS1	-0.660975	3.76398	-8.80257	3.45e-17	6.71e-16	28.2874
LRRC17	-0.945634	3.12526	-8.79474	3.66e-17	7.11e-16	28.2295
MZT1	0.484664	5.0677	8.79339	3.7e-17	7.17e-16	28.2195
TSC22D3	-0.889558	6.26263	-8.79323	3.7e-17	7.17e-16	28.2183
BNC1	1.49841	3.00187	8.79154	3.75e-17	7.25e-16	28.2058
DERA	0.559193	6.20922	8.78714	3.88e-17	7.49e-16	28.1733
SPDL1	0.495654	4.8562	8.78435	3.96e-17	7.64e-16	28.1527
MYCT1	-0.657607	3.40929	-8.78232	4.02e-17	7.75e-16	28.1377
GNAZ	-0.821945	2.91688	-8.78194	4.03e-17	7.76e-16	28.1349
TONSL	0.527674	4.56039	8.77752	4.17e-17	8.01e-16	28.1022
NCL	0.432633	9.0455	8.77745	4.17e-17	8.01e-16	28.1017
GABARAPL1	-0.610272	6.72996	-8.77623	4.21e-17	8.07e-16	28.0927
TMEM178A	-0.67161	2.61729	-8.77192	4.35e-17	8.32e-16	28.0608
NR2F1	-1.0288	4.61386	-8.77186	4.35e-17	8.32e-16	28.0604
DSC2	1.35516	5.52924	8.77045	4.39e-17	8.4e-16	28.05
MRPS17	0.552917	6.11417	8.76947	4.43e-17	8.45e-16	28.0427
RUVBL2	0.451595	7.46115	8.76556	4.56e-17	8.7e-16	28.0139
IFRD2	0.50564	6.2171	8.76189	4.69e-17	8.93e-16	27.9868
PECAM1	-0.715511	4.89813	-8.75561	4.91e-17	9.35e-16	27.9405
NTRK3	-0.523563	2.12004	-8.74722	5.23e-17	9.94e-16	27.8786
MAGEH1	-0.726443	5.22014	-8.74694	5.24e-17	9.95e-16	27.8765
AXIN2	-0.988485	4.1311	-8.74683	5.25e-17	9.95e-16	27.8758
CAPN5	-1.1935	5.45711	-8.73469	5.75e-17	1.09e-15	27.7863
LAMA2	-0.82197	4.62203	-8.72929	5.98e-17	1.13e-15	27.7466
MEDAG	-1.19396	4.06408	-8.72878	6.01e-17	1.14e-15	27.7428
ATP8B2	-0.808446	4.4449	-8.72661	6.1e-17	1.15e-15	27.7268
CYBRD1	-1.02167	5.81129	-8.72396	6.23e-17	1.17e-15	27.7074
SFRP1	-1.44658	3.71054	-8.7219	6.32e-17	1.19e-15	27.6922
PCNA	0.643536	8.40479	8.71947	6.44e-17	1.21e-15	27.6743
AR	-0.999909	3.04747	-8.71677	6.57e-17	1.24e-15	27.6545
ARHGAP15	-0.711829	3.81449	-8.70751	7.04e-17	1.32e-15	27.5864
PNP	0.59832	6.8101	8.70232	7.32e-17	1.37e-15	27.5483
ITIH3	-0.500208	2.14778	-8.69991	7.45e-17	1.4e-15	27.5306
C1QBP	0.554008	7.9391	8.69894	7.51e-17	1.4e-15	27.5235
TUBB4B	0.566674	10.1245	8.69831	7.54e-17	1.41e-15	27.5189
RAMP1	-1.33093	4.83993	-8.69713	7.61e-17	1.42e-15	27.5102
PLCL1	-0.501619	2.60124	-8.69679	7.63e-17	1.42e-15	27.5077
STIP1	0.486895	8.41958	8.6954	7.71e-17	1.44e-15	27.4975
RASSF2	-0.85	4.36826	-8.69454	7.76e-17	1.44e-15	27.4912
UCP2	-0.990381	7.3486	-8.69435	7.77e-17	1.44e-15	27.4898
MTHFD1	0.466807	6.59999	8.69161	7.93e-17	1.47e-15	27.4697
RECQL4	0.718379	5.46596	8.68897	8.09e-17	1.5e-15	27.4503
RCSD1	-0.760925	3.68346	-8.6875	8.18e-17	1.51e-15	27.4396
DISP1	-0.54333	4.02352	-8.68597	8.27e-17	1.53e-15	27.4283
TFAP4	0.466259	4.2195	8.68235	8.5e-17	1.57e-15	27.4017
TGFB3	-1.03057	5.13312	-8.68182	8.53e-17	1.57e-15	27.3979
IDUA	-0.729613	4.98117	-8.67982	8.66e-17	1.6e-15	27.3832
CSRP1	-0.824572	7.59909	-8.67847	8.75e-17	1.61e-15	27.3734
LRRC59	0.451357	6.81676	8.67488	8.99e-17	1.65e-15	27.347
ALDOA	0.542968	10.0867	8.67381	9.06e-17	1.66e-15	27.3392
KRT16	2.3832	7.39012	8.67291	9.12e-17	1.67e-15	27.3326
YWHAQ	0.505898	9.43977	8.6669	9.54e-17	1.75e-15	27.2886
MYLK	-0.89698	5.13173	-8.66593	9.61e-17	1.76e-15	27.2815
ICAM2	-0.73151	4.27737	-8.65606	1.03e-16	1.89e-15	27.2093
RGCC	-0.754249	6.42739	-8.65409	1.05e-16	1.92e-15	27.1948
SLC9A9	-0.778699	4.25416	-8.65132	1.07e-16	1.95e-15	27.1746
SH3BGRL	-0.786931	7.19371	-8.65129	1.07e-16	1.95e-15	27.1743
FGFBP1	2.07515	4.93084	8.64813	1.1e-16	2e-15	27.1512
NDNF	-0.852476	2.79703	-8.64381	1.13e-16	2.06e-15	27.1197
TUBA1B	0.605385	10.0354	8.64342	1.14e-16	2.06e-15	27.1168
YWHAG	0.511306	7.67589	8.64339	1.14e-16	2.06e-15	27.1166
RANGAP1	0.488984	7.45584	8.64118	1.16e-16	2.09e-15	27.1004
FAT3	-0.668891	2.50371	-8.63829	1.18e-16	2.14e-15	27.0793
RFC3	0.619375	5.1708	8.63291	1.23e-16	2.22e-15	27.04
NTNG2	-0.438819	2.365	-8.63241	1.23e-16	2.23e-15	27.0364
NOTCH4	-0.637773	4.18588	-8.62994	1.26e-16	2.27e-15	27.0183
DPEP2	-0.766044	3.1651	-8.62849	1.27e-16	2.29e-15	27.0077
RNASEH2A	0.609271	7.00224	8.62728	1.28e-16	2.31e-15	26.9989
FZD4	-0.74437	4.80216	-8.62267	1.33e-16	2.38e-15	26.9653
SPRR2A	2.17748	3.69797	8.62137	1.34e-16	2.41e-15	26.9558
IL16	-0.681749	3.10283	-8.60879	1.47e-16	2.64e-15	26.864
SLCO1C1	-0.22637	1.74205	-8.60595	1.5e-16	2.69e-15	26.8433
RBM24	-0.583628	2.1693	-8.60507	1.51e-16	2.71e-15	26.8369
DDAH1	-0.919807	4.88016	-8.6048	1.51e-16	2.71e-15	26.835
PDE4B	-0.729475	3.29812	-8.59738	1.6e-16	2.86e-15	26.781
CKAP5	0.494542	7.11062	8.59597	1.62e-16	2.89e-15	26.7706
ADH1A	-0.634136	2.13352	-8.59301	1.65e-16	2.95e-15	26.7491
IARS2	0.477579	7.84105	8.59027	1.69e-16	3e-15	26.7292
TUBG1	0.47857	7.2411	8.58726	1.72e-16	3.07e-15	26.7073
PIK3IP1	-0.744665	5.97832	-8.5866	1.73e-16	3.08e-15	26.7025
ZNF660	-0.44212	2.42191	-8.58612	1.74e-16	3.09e-15	26.699
DPYSL3	-1.2416	6.5296	-8.58195	1.79e-16	3.18e-15	26.6686
IL1RAP	0.832323	4.15554	8.58176	1.8e-16	3.18e-15	26.6672
JUN	-0.756888	7.64908	-8.58118	1.8e-16	3.19e-15	26.6631
NIFK	0.394523	7.06373	8.57852	1.84e-16	3.25e-15	26.6437
AGTR1	-0.774679	2.54138	-8.57621	1.87e-16	3.3e-15	26.6269
MYC	0.842882	7.62891	8.56602	2.02e-16	3.56e-15	26.5529
ACVRL1	-0.660813	4.67405	-8.56451	2.04e-16	3.59e-15	26.5419
PEG3	-0.753673	2.58317	-8.56409	2.05e-16	3.6e-15	26.5389
PPFIA2	-0.251702	1.76078	-8.56064	2.1e-16	3.69e-15	26.5138
MROH7	-0.380273	1.95509	-8.55793	2.14e-16	3.76e-15	26.4942
PSMA3	0.449292	7.78915	8.55593	2.17e-16	3.81e-15	26.4796
RANBP1	0.535334	6.90802	8.55581	2.18e-16	3.81e-15	26.4788
FMOD	-1.00851	5.26132	-8.55087	2.26e-16	3.95e-15	26.4429
NDRG1	1.11626	8.78344	8.55071	2.26e-16	3.95e-15	26.4417
ZNF454	-0.453701	2.33693	-8.55014	2.27e-16	3.96e-15	26.4376
EFTUD2	0.401502	7.24702	8.55004	2.27e-16	3.96e-15	26.4369
IGIP	-0.454607	3.91582	-8.54484	2.36e-16	4.11e-15	26.3992
SCN1B	-0.636579	3.1531	-8.54458	2.36e-16	4.12e-15	26.3973
RTN1	-0.671775	2.73768	-8.53958	2.45e-16	4.27e-15	26.361
POLR3G	0.574468	2.92666	8.53347	2.57e-16	4.46e-15	26.3168
HSD17B14	-0.850833	4.73815	-8.53002	2.63e-16	4.57e-15	26.2918
NCLN	0.423028	6.78946	8.52761	2.68e-16	4.65e-15	26.2743
KIF15	0.66969	4.27389	8.52732	2.68e-16	4.65e-15	26.2723
GPR162	-0.5866	2.81574	-8.52539	2.72e-16	4.71e-15	26.2583
RPP40	0.501913	5.6981	8.51857	2.86e-16	4.95e-15	26.209
PKNOX2	-0.544582	2.41967	-8.5179	2.88e-16	4.97e-15	26.2041
DOCK11	-0.804408	4.57188	-8.51667	2.9e-16	5.01e-15	26.1952
CDK7	0.417962	6.4226	8.51038	3.04e-16	5.24e-15	26.1497
WIPF1	-0.818486	5.31217	-8.50936	3.06e-16	5.28e-15	26.1423
ESCO2	0.524992	3.3567	8.50473	3.17e-16	5.45e-15	26.1088
SLIRP	0.462707	7.69062	8.50468	3.17e-16	5.45e-15	26.1085
HPGDS	-0.611585	2.7508	-8.50375	3.19e-16	5.48e-15	26.1018
CDCP1	0.883576	5.9043	8.5035	3.2e-16	5.49e-15	26.1
ABCF2	0.390338	6.26706	8.49801	3.33e-16	5.71e-15	26.0603
RHCG	1.84641	4.21989	8.49373	3.44e-16	5.88e-15	26.0294
PGLYRP3	1.25543	3.03036	8.48834	3.58e-16	6.11e-15	25.9905
COL4A3	-0.541544	2.10724	-8.48653	3.62e-16	6.19e-15	25.9774
MROH8	-0.313561	2.24377	-8.48444	3.68e-16	6.28e-15	25.9623
CELSR2	0.910315	4.80571	8.48414	3.69e-16	6.28e-15	25.9602
TAF5	0.377048	4.12636	8.48412	3.69e-16	6.28e-15	25.9601
PSMA6	0.450153	6.47249	8.48408	3.69e-16	6.28e-15	25.9597
KRT9	0.71949	2.4717	8.48271	3.73e-16	6.33e-15	25.9499
TFDP1	0.568124	7.0469	8.48124	3.77e-16	6.39e-15	25.9393
OMD	-0.896408	2.61749	-8.47998	3.8e-16	6.45e-15	25.9302
MICU3	-0.407528	2.24706	-8.4703	4.08e-16	6.91e-15	25.8604
C14orf28	-0.405368	3.51774	-8.46998	4.09e-16	6.92e-15	25.8581
RSPO2	-0.548008	1.95367	-8.46894	4.12e-16	6.97e-15	25.8506
DMD	-0.81925	3.18508	-8.46584	4.22e-16	7.12e-15	25.8283
POLE2	0.593004	4.48386	8.46567	4.22e-16	7.12e-15	25.8271
GHRL	-0.334148	2.03653	-8.46322	4.3e-16	7.25e-15	25.8094
SULT1C4	-0.530574	2.27212	-8.46177	4.35e-16	7.32e-15	25.799
RPF2	0.390235	6.35225	8.4606	4.38e-16	7.37e-15	25.7906
MAPRE2	-0.692072	4.84913	-8.45896	4.44e-16	7.45e-15	25.7788
SPNS3	-0.490179	2.21917	-8.44994	4.74e-16	7.95e-15	25.7138
DDX21	0.59708	7.42499	8.44675	4.85e-16	8.13e-15	25.6909
APH1B	-0.469716	4.11796	-8.44195	5.03e-16	8.42e-15	25.6564
MCTS1	0.447437	5.95649	8.44004	5.1e-16	8.53e-15	25.6426
RCE1	0.455804	5.78438	8.43446	5.31e-16	8.87e-15	25.6025
GNAI3	0.40182	5.50409	8.42816	5.56e-16	9.28e-15	25.5573
VRK1	0.513942	6.19748	8.42651	5.63e-16	9.39e-15	25.5455
SELL	-1.13891	4.51545	-8.42283	5.78e-16	9.63e-15	25.5191
GNG11	-0.844088	5.30275	-8.42177	5.83e-16	9.7e-15	25.5114
CADPS2	-0.72311	4.57728	-8.42092	5.86e-16	9.75e-15	25.5054
ST6GALNAC3	-0.390766	2.03844	-8.41472	6.13e-16	1.02e-14	25.4609
SATB1	-0.714509	4.38429	-8.40938	6.38e-16	1.06e-14	25.4226
GPSM3	-0.778082	5.03979	-8.40696	6.49e-16	1.08e-14	25.4052
PI3	2.7331	6.44469	8.40695	6.49e-16	1.08e-14	25.4051
ESAM	-0.636642	4.74913	-8.39175	7.26e-16	1.2e-14	25.2963
SPEG	-0.938594	3.25273	-8.38821	7.44e-16	1.23e-14	25.271
RGS1	-1.24114	6.43498	-8.38675	7.52e-16	1.24e-14	25.2605
UBE2V2	0.4323	5.648	8.38625	7.55e-16	1.25e-14	25.2569
MAP1B	-1.01559	4.77875	-8.38529	7.6e-16	1.25e-14	25.25
ITPR3	0.759627	6.87472	8.38186	7.8e-16	1.28e-14	25.2255
GLI1	-0.600663	2.43873	-8.38045	7.88e-16	1.3e-14	25.2155
SUV39H1	0.508627	4.80558	8.37795	8.02e-16	1.32e-14	25.1976
EXOSC2	0.429555	5.33806	8.3764	8.11e-16	1.33e-14	25.1865
LONRF2	-0.505408	2.07557	-8.37516	8.19e-16	1.34e-14	25.1776
CPNE5	-0.565892	3.01251	-8.37109	8.43e-16	1.38e-14	25.1485
BCL2	-0.567519	3.07003	-8.37108	8.43e-16	1.38e-14	25.1484
PPIH	0.44998	6.49085	8.36201	9.01e-16	1.47e-14	25.0837
NFATC1	-0.635544	3.34197	-8.36097	9.08e-16	1.48e-14	25.0762
NRAS	0.497566	6.29527	8.35965	9.17e-16	1.49e-14	25.0668
NAP1L5	-0.569379	3.49095	-8.35756	9.31e-16	1.52e-14	25.0519
C1orf54	-0.611228	5.28628	-8.35389	9.56e-16	1.56e-14	25.0258
GNAO1	-0.633592	2.39026	-8.35312	9.61e-16	1.56e-14	25.0202
SKAP1	-0.843138	4.06981	-8.35115	9.75e-16	1.58e-14	25.0062
WDR74	0.427222	5.86538	8.34776	9.99e-16	1.62e-14	24.982
CPA4	1.44952	3.53145	8.33953	1.06e-15	1.72e-14	24.9233
CPOX	0.44348	5.76535	8.33906	1.06e-15	1.72e-14	24.92
RCAN1	-0.789121	5.5366	-8.3348	1.1e-15	1.78e-14	24.8896
PPIL1	0.476472	6.33337	8.33366	1.11e-15	1.79e-14	24.8815
PRICKLE2	-0.749962	4.00194	-8.33182	1.12e-15	1.81e-14	24.8684
RBFOX3	-0.527869	1.93978	-8.32917	1.14e-15	1.85e-14	24.8496
GRIK5	-0.516075	2.28233	-8.32854	1.15e-15	1.85e-14	24.8451
TM6SF1	-0.521608	3.09508	-8.32776	1.16e-15	1.86e-14	24.8395
IGFBP7	-0.855524	9.61905	-8.32328	1.19e-15	1.92e-14	24.8076
CBFA2T3	-0.512493	2.4872	-8.31395	1.28e-15	2.05e-14	24.7412
SYT11	-0.803771	4.17401	-8.31367	1.28e-15	2.05e-14	24.7392
LRCH2	-0.749504	3.21725	-8.30803	1.33e-15	2.14e-14	24.6992
AMT	-0.732139	4.75681	-8.30645	1.35e-15	2.16e-14	24.6879
C6	-0.38234	1.84178	-8.30003	1.41e-15	2.26e-14	24.6423
MRPS35	0.438447	7.05174	8.29866	1.43e-15	2.28e-14	24.6326
BARX2	1.33083	3.67286	8.29775	1.44e-15	2.29e-14	24.6261
ITGB1BP2	-0.558587	3.23705	-8.29625	1.45e-15	2.32e-14	24.6155
CCL16	-0.215923	1.80492	-8.29134	1.5e-15	2.4e-14	24.5807
DOCK8	-0.729102	5.03926	-8.29067	1.51e-15	2.41e-14	24.5758
PPM1M	-0.55892	5.18337	-8.28885	1.53e-15	2.44e-14	24.563
CENPL	0.510707	3.97838	8.28844	1.54e-15	2.44e-14	24.56
SERP2	-0.615432	2.83379	-8.28725	1.55e-15	2.46e-14	24.5516
DMPK	-0.578552	5.25704	-8.2868	1.55e-15	2.47e-14	24.5484
DDN	0.448061	2.10653	8.28316	1.6e-15	2.53e-14	24.5226
CD248	-0.95285	6.33361	-8.28134	1.62e-15	2.56e-14	24.5097
UCHL5	0.43853	4.86502	8.278	1.66e-15	2.62e-14	24.486
MAGOH	0.449919	7.66766	8.27634	1.68e-15	2.65e-14	24.4743
NUP93	0.39839	5.90967	8.25807	1.91e-15	3.02e-14	24.3449
ALDH2	-0.965188	5.59766	-8.25517	1.95e-15	3.08e-14	24.3243
GIMAP7	-0.853354	5.212	-8.25132	2.01e-15	3.17e-14	24.2971
HSP90AB1	0.448742	11.3787	8.25026	2.02e-15	3.19e-14	24.2896
ASF1B	0.698783	5.5754	8.24752	2.06e-15	3.25e-14	24.2702
LY9	-0.563835	2.43594	-8.24479	2.11e-15	3.31e-14	24.251
DPT	-1.43334	4.12772	-8.24432	2.11e-15	3.32e-14	24.2476
PSMA5	0.436924	7.32957	8.23749	2.22e-15	3.48e-14	24.1994
PDCD11	0.392055	6.29905	8.23133	2.32e-15	3.63e-14	24.1558
FAM13B	-0.526386	5.37988	-8.23085	2.33e-15	3.64e-14	24.1525
NPM1	0.510156	9.06487	8.2289	2.36e-15	3.69e-14	24.1387
S100A8	2.33606	8.50114	8.22757	2.38e-15	3.72e-14	24.1293
IGFBP4	-0.859766	8.89763	-8.22623	2.41e-15	3.76e-14	24.1198
DAB2	-0.851125	5.66898	-8.2261	2.41e-15	3.76e-14	24.1189
FAM124A	-0.465474	2.45569	-8.22274	2.47e-15	3.84e-14	24.0953
NAA15	0.406898	5.5263	8.22025	2.51e-15	3.91e-14	24.0777
NUP155	0.559852	6.06402	8.21723	2.57e-15	3.99e-14	24.0564
S100A9	1.97432	9.76977	8.2159	2.59e-15	4.03e-14	24.047
DPH2	0.441232	5.82925	8.21481	2.61e-15	4.05e-14	24.0394
ARPC5L	0.426328	6.80436	8.2147	2.61e-15	4.05e-14	24.0386
USHBP1	-0.347345	2.31179	-8.21371	2.63e-15	4.08e-14	24.0316
RASGRP3	-0.502586	3.70736	-8.20771	2.75e-15	4.25e-14	23.9893
CELF6	-0.21137	2.04768	-8.20597	2.78e-15	4.3e-14	23.977
GSTP1	0.68885	10.6765	8.19951	2.92e-15	4.5e-14	23.9316
CD300LB	-0.401698	2.17179	-8.19475	3.02e-15	4.66e-14	23.898
HRAS	0.560544	6.47482	8.19356	3.04e-15	4.69e-14	23.8897
EBF2	-0.375271	2.01995	-8.19344	3.05e-15	4.69e-14	23.8888
CPXM1	-1.2035	5.41684	-8.19165	3.08e-15	4.75e-14	23.8762
TAGLN2	0.673592	9.78047	8.19022	3.12e-15	4.79e-14	23.8661
RARRES2	-1.16854	6.45838	-8.18963	3.13e-15	4.81e-14	23.862
TRIM7	0.734444	2.99449	8.18658	3.2e-15	4.91e-14	23.8405
ACOX2	-0.735729	2.95223	-8.18341	3.27e-15	5.02e-14	23.8183
GGH	0.864574	6.15458	8.17914	3.37e-15	5.17e-14	23.7883
PCBP3	-0.493501	2.23285	-8.17906	3.38e-15	5.17e-14	23.7877
CDH5	-0.718186	4.93807	-8.17628	3.44e-15	5.27e-14	23.7682
ACOT7	0.625044	6.05683	8.17267	3.53e-15	5.4e-14	23.7428
CD40LG	-0.528057	2.35801	-8.16978	3.61e-15	5.51e-14	23.7225
BLM	0.508315	4.42499	8.16412	3.76e-15	5.73e-14	23.6828
RPL7L1	0.417535	6.23842	8.16398	3.76e-15	5.73e-14	23.6818
S100A7	2.85215	5.82402	8.16047	3.86e-15	5.87e-14	23.6572
FKBP4	0.518273	7.78482	8.1544	4.03e-15	6.12e-14	23.6146
TLR4	-0.701947	3.99765	-8.15376	4.05e-15	6.15e-14	23.6101
EIF4H	0.388555	7.59598	8.14997	4.16e-15	6.31e-14	23.5835
ARSG	-0.398279	2.9957	-8.14333	4.36e-15	6.61e-14	23.537
CENPH	0.536956	5.02929	8.13757	4.54e-15	6.88e-14	23.4967
KIF18A	0.606209	4.26293	8.1364	4.58e-15	6.93e-14	23.4885
PPP1R3C	-1.28859	5.24262	-8.13546	4.61e-15	6.97e-14	23.4819
CDH3	1.49785	6.97924	8.1328	4.7e-15	7.1e-14	23.4633
EZH2	0.640315	5.44157	8.13135	4.75e-15	7.17e-14	23.4532
PRKDC	0.592268	7.4085	8.13124	4.75e-15	7.17e-14	23.4524
PPP1R16B	-0.666613	3.2455	-8.13071	4.77e-15	7.19e-14	23.4487
CENPU	0.622739	5.33086	8.13016	4.79e-15	7.21e-14	23.4448
RAE1	0.396037	5.98048	8.12273	5.05e-15	7.59e-14	23.3929
DPYSL2	-0.788577	6.04559	-8.12097	5.11e-15	7.68e-14	23.3805
PCOLCE	-0.987483	6.51392	-8.11874	5.19e-15	7.8e-14	23.365
CHAF1B	0.61417	5.13358	8.11759	5.24e-15	7.86e-14	23.3569
PELI2	-0.753149	3.38966	-8.11534	5.32e-15	7.98e-14	23.3412
LXN	-0.966284	6.1955	-8.11253	5.43e-15	8.13e-14	23.3216
RUSC2	-0.637658	4.55074	-8.10917	5.56e-15	8.32e-14	23.2981
SNRPB	0.47728	9.1746	8.10812	5.6e-15	8.37e-14	23.2908
MEIS3	-0.677977	3.30001	-8.10753	5.63e-15	8.4e-14	23.2867
XRCC2	0.492284	3.6601	8.10502	5.73e-15	8.54e-14	23.2691
VAMP2	-0.415736	5.1338	-8.10247	5.83e-15	8.69e-14	23.2513
HNRNPC	0.318363	8.77494	8.1017	5.87e-15	8.73e-14	23.2459
SLC46A3	-0.687035	4.37172	-8.10017	5.93e-15	8.82e-14	23.2353
SRD5A1	0.625788	4.26769	8.09904	5.98e-15	8.88e-14	23.2274
MRPL11	0.451354	6.27168	8.09645	6.09e-15	9.04e-14	23.2093
SLC8A3	-0.146478	1.66702	-8.09314	6.23e-15	9.25e-14	23.1862
KAT2B	-0.625153	5.26405	-8.09224	6.27e-15	9.3e-14	23.1799
EBP	0.508353	7.38455	8.09075	6.34e-15	9.39e-14	23.1695
ANKRD24	-0.419566	2.37948	-8.09029	6.36e-15	9.41e-14	23.1663
AMPH	-0.55414	2.47109	-8.08705	6.51e-15	9.62e-14	23.1438
CLU	-1.18852	6.62867	-8.08576	6.57e-15	9.69e-14	23.1348
PAQR8	-0.826586	4.18516	-8.08576	6.57e-15	9.69e-14	23.1348
MRPS2	0.412647	6.08974	8.08479	6.61e-15	9.75e-14	23.128
MIF	0.529088	8.80688	8.0844	6.63e-15	9.77e-14	23.1253
TTF2	0.480688	4.93521	8.08209	6.74e-15	9.92e-14	23.1092
GALM	-0.636475	5.66355	-8.08152	6.77e-15	9.95e-14	23.1053
SPOCK2	-0.899726	4.39323	-8.07576	7.05e-15	1.04e-13	23.0651
TNRC6C	-0.467326	3.26709	-8.07272	7.21e-15	1.06e-13	23.044
CCDC136	-0.597683	2.84421	-8.06615	7.55e-15	1.11e-13	22.9983
CIAPIN1	0.37819	5.90196	8.06302	7.72e-15	1.13e-13	22.9765
TMEM47	-1.04875	5.48799	-8.05889	7.95e-15	1.16e-13	22.9478
STX6	0.413938	5.83206	8.05795	8e-15	1.17e-13	22.9412
KALRN	-0.582043	3.10128	-8.05531	8.15e-15	1.19e-13	22.9229
DDX31	0.351719	4.43954	8.05204	8.35e-15	1.22e-13	22.9001
CD1C	-0.789064	3.11804	-8.04939	8.5e-15	1.24e-13	22.8817
LYVE1	-0.984167	3.49716	-8.04676	8.66e-15	1.26e-13	22.8635
ECM2	-0.643591	3.36657	-8.04431	8.81e-15	1.28e-13	22.8465
CCDC77	0.443795	4.67462	8.04302	8.9e-15	1.29e-13	22.8375
PSMB2	0.450825	7.54536	8.04252	8.93e-15	1.3e-13	22.8341
SFMBT2	-0.581774	3.44518	-8.04247	8.93e-15	1.3e-13	22.8337
PLXNA1	0.584974	6.29972	8.04009	9.08e-15	1.32e-13	22.8172
PRSS35	-0.496987	2.14937	-8.03895	9.16e-15	1.33e-13	22.8093
HID1	-1.08537	4.75586	-8.03651	9.32e-15	1.35e-13	22.7923
NOB1	0.421814	6.47755	8.03035	9.73e-15	1.41e-13	22.7496
TRANK1	-0.60583	4.9993	-8.02761	9.92e-15	1.43e-13	22.7306
MYOM2	-0.434883	2.25343	-8.02721	9.95e-15	1.44e-13	22.7278
LSM5	0.406359	5.76075	8.0242	1.02e-14	1.47e-13	22.707
ARHGEF40	-0.581627	4.31318	-8.02312	1.02e-14	1.48e-13	22.6995
SMC2	0.550317	5.05678	8.02286	1.03e-14	1.48e-13	22.6977
SLC8A1	-0.526203	3.12093	-8.0212	1.04e-14	1.49e-13	22.6862
NTF3	-0.532311	2.38176	-8.02037	1.04e-14	1.5e-13	22.6804
CCT8	0.390298	8.65111	8.01928	1.05e-14	1.51e-13	22.6729
MAGOHB	0.387206	4.23939	8.01846	1.06e-14	1.52e-13	22.6672
KPNB1	0.370209	8.47016	8.01532	1.08e-14	1.55e-13	22.6455
PDE3B	-0.640812	3.63203	-8.01101	1.12e-14	1.6e-13	22.6156
TNFRSF13B	-0.580406	2.21398	-8.01021	1.12e-14	1.61e-13	22.6101
MEIS2	-0.598962	3.54152	-8.00825	1.14e-14	1.63e-13	22.5965
TCEAL3	-0.714871	6.35029	-8.007	1.15e-14	1.64e-13	22.5879
ITPKB	-0.501935	5.10048	-8.00384	1.17e-14	1.68e-13	22.566
SH2D3C	-0.555805	3.89045	-7.99778	1.22e-14	1.75e-13	22.5241
OSR1	-1.07897	4.13022	-7.99359	1.26e-14	1.8e-13	22.4952
DHRS12	-0.387024	3.68467	-7.98979	1.3e-14	1.85e-13	22.4689
PLSCR4	-0.761414	4.33843	-7.98872	1.31e-14	1.86e-13	22.4615
PRPF4	0.412519	6.42151	7.98817	1.31e-14	1.86e-13	22.4577
MRPL3	0.420802	7.98316	7.98335	1.36e-14	1.93e-13	22.4244
BLK	-0.761181	2.30263	-7.98009	1.39e-14	1.97e-13	22.4019
FANCB	0.500256	3.65947	7.98005	1.39e-14	1.97e-13	22.4017
BZW2	0.499014	7.43719	7.97997	1.39e-14	1.97e-13	22.4011
PDIA6	0.517569	7.85817	7.96886	1.5e-14	2.13e-13	22.3245
LRRC42	0.479693	6.59637	7.96524	1.54e-14	2.18e-13	22.2995
PRMT3	0.393696	4.79714	7.96474	1.55e-14	2.18e-13	22.296
HES2	1.12696	3.56567	7.96206	1.57e-14	2.22e-13	22.2776
HVCN1	-0.557651	3.64866	-7.96177	1.58e-14	2.23e-13	22.2756
SSPN	-0.724404	4.34372	-7.95983	1.6e-14	2.26e-13	22.2622
TPM3	0.381892	8.02419	7.95786	1.62e-14	2.28e-13	22.2487
FCER1A	-0.940197	3.3762	-7.95749	1.63e-14	2.29e-13	22.2461
ANKS1B	-0.38597	1.95228	-7.95734	1.63e-14	2.29e-13	22.245
MMRN2	-0.916563	4.8789	-7.95484	1.66e-14	2.33e-13	22.2278
TP53INP1	-0.595805	5.45659	-7.95385	1.67e-14	2.34e-13	22.221
PRG4	-0.714683	2.30996	-7.9498	1.72e-14	2.41e-13	22.1931
LMO2	-0.646951	4.54893	-7.94481	1.78e-14	2.49e-13	22.1588
NPAS4	-0.432572	1.90592	-7.94454	1.78e-14	2.49e-13	22.157
CTSV	1.12585	3.94667	7.94348	1.79e-14	2.51e-13	22.1497
KRT5	2.70197	8.83429	7.9402	1.84e-14	2.57e-13	22.1271
ADAM22	-0.522116	2.49675	-7.93938	1.85e-14	2.58e-13	22.1215
C1QTNF3	-0.73563	3.13061	-7.93796	1.87e-14	2.6e-13	22.1117
GRWD1	0.391673	6.13071	7.93769	1.87e-14	2.61e-13	22.1099
ST6GAL1	-0.843637	4.33858	-7.93614	1.89e-14	2.63e-13	22.0992
CCDC3	-0.756911	4.3665	-7.93441	1.91e-14	2.66e-13	22.0873
PPIF	0.560388	6.69972	7.93356	1.92e-14	2.68e-13	22.0815
IQGAP2	-0.650219	3.73982	-7.93294	1.93e-14	2.68e-13	22.0772
UBE2D4	-0.374477	4.32276	-7.9325	1.94e-14	2.69e-13	22.0742
VDAC2	0.439489	7.01899	7.93031	1.97e-14	2.73e-13	22.0591
WDR12	0.416601	5.60901	7.92887	1.99e-14	2.76e-13	22.0492
PPA1	0.458139	8.13547	7.92677	2.02e-14	2.79e-13	22.0348
RAB3C	-0.259497	1.71476	-7.92562	2.03e-14	2.81e-13	22.0269
DTD1	0.473484	5.97311	7.92113	2.1e-14	2.9e-13	21.9961
S100A14	1.70626	7.70119	7.92093	2.1e-14	2.9e-13	21.9947
TEX30	0.530039	4.75351	7.92	2.12e-14	2.92e-13	21.9883
SYBU	-0.704861	2.69736	-7.91837	2.14e-14	2.95e-13	21.9771
RGS13	-0.473688	2.02997	-7.9176	2.15e-14	2.96e-13	21.9718
KCNN3	-0.455842	2.66051	-7.91544	2.18e-14	3.01e-13	21.9571
PPM1K	-0.499628	3.55619	-7.91356	2.21e-14	3.04e-13	21.9441
INPP5D	-0.801226	5.31742	-7.90681	2.32e-14	3.19e-13	21.8979
GATM	-1.06436	4.60187	-7.90448	2.36e-14	3.24e-13	21.8819
CARD8	-0.370626	3.62388	-7.90448	2.36e-14	3.24e-13	21.8819
AMD1	0.457959	6.05444	7.90396	2.37e-14	3.24e-13	21.8784
PWP1	0.351419	7.50644	7.9036	2.37e-14	3.25e-13	21.8759
RGN	-0.614709	2.46042	-7.9034	2.38e-14	3.25e-13	21.8745
NME5	-0.57331	2.49095	-7.9026	2.39e-14	3.27e-13	21.869
SFRP4	-1.70718	5.24533	-7.90194	2.4e-14	3.28e-13	21.8645
PTBP1	0.339333	8.21637	7.90147	2.41e-14	3.29e-13	21.8613
HLX	-0.539439	3.64621	-7.90059	2.42e-14	3.31e-13	21.8552
ZFYVE28	-0.396547	2.68772	-7.89803	2.47e-14	3.36e-13	21.8377
DOLPP1	0.404116	5.53216	7.8974	2.48e-14	3.37e-13	21.8334
GSDMC	1.32702	4.14615	7.8944	2.53e-14	3.44e-13	21.8128
SLC25A39	0.378009	8.27811	7.89212	2.57e-14	3.5e-13	21.7972
DPEP1	-0.665768	2.21796	-7.89091	2.59e-14	3.52e-13	21.789
COL21A1	-0.733168	2.6717	-7.88912	2.63e-14	3.56e-13	21.7767
NICN1	-0.446215	4.80745	-7.88828	2.64e-14	3.58e-13	21.7709
ARID5B	-0.594018	6.299	-7.88625	2.68e-14	3.63e-13	21.7571
ATL1	-0.567528	4.09819	-7.88241	2.75e-14	3.73e-13	21.7308
RRP15	0.405333	4.82432	7.88161	2.77e-14	3.74e-13	21.7254
SH3RF3	-0.563388	3.23701	-7.87849	2.83e-14	3.82e-13	21.704
PCDH18	-0.658847	3.30412	-7.87822	2.83e-14	3.83e-13	21.7022
KLF15	-0.743434	2.85847	-7.87242	2.95e-14	3.98e-13	21.6625
CMTM5	-0.19404	1.79221	-7.87233	2.95e-14	3.98e-13	21.6619
YBX3	0.53064	8.07018	7.87167	2.97e-14	4e-13	21.6574
DLG4	-0.596663	4.0519	-7.87059	2.99e-14	4.02e-13	21.65
ULBP2	0.909629	4.49852	7.87051	2.99e-14	4.02e-13	21.6495
IRAK1	0.54392	7.78716	7.86936	3.01e-14	4.05e-13	21.6416
KIT	-1.0312	4.01845	-7.86702	3.06e-14	4.11e-13	21.6256
NDE1	0.497189	5.4053	7.86555	3.09e-14	4.15e-13	21.6156
CLP1	0.371123	4.83433	7.86253	3.16e-14	4.24e-13	21.5949
UNC5C	-0.472284	2.4546	-7.85233	3.39e-14	4.55e-13	21.5254
REEP1	-0.817764	2.69909	-7.84988	3.45e-14	4.62e-13	21.5087
AQP7	-0.637122	2.31597	-7.84889	3.48e-14	4.65e-13	21.5019
CAD	0.472477	6.17272	7.84759	3.51e-14	4.69e-13	21.4931
PES1	0.412145	6.97802	7.84307	3.62e-14	4.83e-13	21.4623
DHX37	0.326662	5.03578	7.84237	3.64e-14	4.85e-13	21.4575
TRAF1	-0.598434	4.00117	-7.84215	3.64e-14	4.86e-13	21.456
SERPINB13	1.61124	3.64177	7.84029	3.69e-14	4.91e-13	21.4433
NDN	-0.906963	4.606	-7.83786	3.75e-14	4.99e-13	21.4268
HNRNPA2B1	0.388157	9.32112	7.83759	3.76e-14	5e-13	21.4249
NFKBID	-0.416735	3.92784	-7.83667	3.78e-14	5.03e-13	21.4187
NPTXR	-0.906105	3.4384	-7.83192	3.91e-14	5.19e-13	21.3863
POLE3	0.448625	6.90093	7.8309	3.94e-14	5.22e-13	21.3794
NOP58	0.385377	7.7502	7.83059	3.95e-14	5.23e-13	21.3773
CLEC10A	-0.800373	3.30864	-7.82674	4.05e-14	5.37e-13	21.351
NPM3	0.48858	6.31479	7.82469	4.11e-14	5.44e-13	21.3371
DYNLL1	0.332256	9.24616	7.82384	4.14e-14	5.47e-13	21.3313
CRYAB	-1.15888	5.39758	-7.82288	4.16e-14	5.5e-13	21.3248
ARHGEF17	-0.580431	4.8857	-7.82002	4.25e-14	5.61e-13	21.3054
TNFRSF14	-0.600287	5.81038	-7.81987	4.25e-14	5.61e-13	21.3043
RCOR1	0.44389	4.99189	7.81845	4.29e-14	5.66e-13	21.2947
BMP4	-0.970215	4.36845	-7.81682	4.34e-14	5.72e-13	21.2836
C16orf86	-0.469475	2.97914	-7.81291	4.46e-14	5.87e-13	21.257
ENOX1	-0.625401	3.0264	-7.81126	4.51e-14	5.93e-13	21.2458
SMTNL2	-0.694259	2.43669	-7.80421	4.74e-14	6.23e-13	21.198
MCM7	0.525244	7.84279	7.80165	4.82e-14	6.33e-13	21.1806
EMX2	-0.959333	2.74999	-7.78361	5.47e-14	7.17e-13	21.0582
HSPB8	-1.27814	6.19551	-7.78336	5.48e-14	7.18e-13	21.0565
LRR1	0.439886	4.61152	7.78275	5.5e-14	7.2e-13	21.0524
MRPS23	0.383622	5.80869	7.78182	5.53e-14	7.24e-13	21.0461
RFC2	0.43049	6.22243	7.78121	5.56e-14	7.27e-13	21.0419
ANKAR	-0.329679	3.00614	-7.77633	5.75e-14	7.51e-13	21.0089
SNAI3	-0.470712	2.61715	-7.7753	5.79e-14	7.56e-13	21.0019
SBSN	1.91136	4.18766	7.7748	5.81e-14	7.58e-13	20.9985
IL36G	1.21342	2.6903	7.77074	5.98e-14	7.79e-13	20.9711
DARS2	0.519216	6.10717	7.77006	6e-14	7.82e-13	20.9665
RIOK1	0.432592	6.01592	7.76768	6.1e-14	7.94e-13	20.9504
MTHFD2	0.631902	6.43352	7.7673	6.12e-14	7.96e-13	20.9478
TGFB1I1	-0.826609	5.50603	-7.76314	6.3e-14	8.18e-13	20.9197
BHLHE22	-0.444638	2.25615	-7.76122	6.38e-14	8.28e-13	20.9067
SYPL2	-0.397394	2.06826	-7.76013	6.43e-14	8.34e-13	20.8994
TAL1	-0.370654	2.17883	-7.75992	6.44e-14	8.35e-13	20.8979
VMA21	0.369693	6.05449	7.75801	6.52e-14	8.45e-13	20.885
NEDD9	-0.819513	5.09016	-7.75374	6.72e-14	8.69e-13	20.8562
PSME3	0.373729	7.03933	7.75199	6.8e-14	8.79e-13	20.8443
TSHZ3	-0.800556	3.96885	-7.74878	6.95e-14	8.98e-13	20.8226
KCNQ1	-0.781205	4.43986	-7.7468	7.05e-14	9.1e-13	20.8093
TP53INP2	-0.633692	4.67654	-7.74549	7.11e-14	9.17e-13	20.8005
ANTXR2	-0.828304	4.83687	-7.74518	7.13e-14	9.19e-13	20.7984
KLRB1	-0.732583	3.59126	-7.74496	7.14e-14	9.19e-13	20.7969
FCER2	-0.689058	2.09847	-7.73937	7.42e-14	9.55e-13	20.7591
ARRDC2	-0.421079	4.77619	-7.73929	7.42e-14	9.55e-13	20.7586
ZNF546	-0.278371	2.33053	-7.73846	7.47e-14	9.59e-13	20.753
PDE9A	-0.917309	4.02544	-7.73819	7.48e-14	9.6e-13	20.7512
MAN1A1	-0.760868	5.76348	-7.73609	7.59e-14	9.74e-13	20.737
FAM210A	0.460476	4.76538	7.73522	7.63e-14	9.79e-13	20.7311
TIPIN	0.403455	4.39434	7.73331	7.74e-14	9.91e-13	20.7183
REEP4	0.47862	6.46233	7.72938	7.95e-14	1.02e-12	20.6918
B3GNT4	0.491007	2.52543	7.72725	8.06e-14	1.03e-12	20.6774
GEMIN4	0.415887	5.27239	7.72724	8.07e-14	1.03e-12	20.6773
ATOH8	-0.813017	2.85897	-7.72559	8.16e-14	1.04e-12	20.6663
FMO5	-0.505418	2.76264	-7.72309	8.3e-14	1.06e-12	20.6494
CXCL14	-1.47388	5.39094	-7.72132	8.4e-14	1.07e-12	20.6374
FGF2	-0.707945	2.80464	-7.72126	8.4e-14	1.07e-12	20.6371
ANXA1	1.05359	9.30953	7.72064	8.44e-14	1.07e-12	20.6329
RINL	-0.536757	3.40003	-7.7138	8.85e-14	1.13e-12	20.5868
POLD1	0.474172	5.40565	7.71327	8.88e-14	1.13e-12	20.5833
TMEM50B	-0.454738	5.50938	-7.71209	8.95e-14	1.14e-12	20.5753
KCTD5	0.349446	6.58004	7.71185	8.97e-14	1.14e-12	20.5737
GKAP1	-0.512773	3.45391	-7.70765	9.23e-14	1.17e-12	20.5454
GJB5	1.26435	5.45262	7.70687	9.28e-14	1.17e-12	20.5402
SPINK1	-2.57625	6.89364	-7.70687	9.28e-14	1.17e-12	20.5402
ABCD2	-0.329703	2.08986	-7.69845	9.83e-14	1.24e-12	20.4836
HPD	-0.664513	2.44881	-7.69799	9.86e-14	1.25e-12	20.4805
N4BP2L1	-0.512009	3.52148	-7.69767	9.88e-14	1.25e-12	20.4783
GPR160	-0.951572	4.08541	-7.69736	9.9e-14	1.25e-12	20.4763
SDHB	0.318536	8.2345	7.69694	9.93e-14	1.25e-12	20.4734
ZNF575	-0.25562	2.55384	-7.69406	1.01e-13	1.28e-12	20.4541
ITGA10	-0.464271	2.57195	-7.69203	1.03e-13	1.29e-12	20.4405
ZWILCH	0.402825	4.55068	7.69133	1.03e-13	1.3e-12	20.4358
YWHAZ	0.493287	9.05986	7.68994	1.04e-13	1.31e-12	20.4265
NOL11	0.378835	6.93224	7.68992	1.04e-13	1.31e-12	20.4263
MASP1	-0.556827	2.10298	-7.68969	1.04e-13	1.31e-12	20.4247
NLE1	0.380688	4.54791	7.68792	1.06e-13	1.33e-12	20.4129
SLC25A25	-0.523426	4.60083	-7.68701	1.06e-13	1.33e-12	20.4068
SRPRB	0.344268	7.27499	7.68594	1.07e-13	1.34e-12	20.3996
SCARF2	-0.79468	4.17386	-7.68532	1.08e-13	1.35e-12	20.3955
TMEM175	-0.433232	5.01566	-7.68443	1.08e-13	1.35e-12	20.3894
MAP3K9	0.528149	3.60475	7.68361	1.09e-13	1.36e-12	20.384
SNRPF	0.4759	7.83223	7.68049	1.11e-13	1.39e-12	20.3631
ZFPM2	-0.749228	3.28506	-7.67658	1.14e-13	1.42e-12	20.3368
SERPINB4	1.86977	4.27924	7.67474	1.16e-13	1.44e-12	20.3245
PLA2G2D	-0.873346	2.6298	-7.67407	1.16e-13	1.45e-12	20.32
P4HA3	-0.640062	3.15279	-7.67402	1.16e-13	1.45e-12	20.3197
DIP2B	0.476466	5.41014	7.67355	1.17e-13	1.45e-12	20.3165
NUP62CL	0.690629	3.50775	7.66999	1.19e-13	1.48e-12	20.2927
SLC3A2	0.54607	7.44642	7.66824	1.21e-13	1.5e-12	20.2809
SRM	0.422213	7.45614	7.66802	1.21e-13	1.5e-12	20.2795
PTPN5	-0.26362	1.87627	-7.66725	1.22e-13	1.51e-12	20.2743
IL10RA	-0.847004	4.73289	-7.66664	1.22e-13	1.51e-12	20.2702
ALG3	0.383636	6.59417	7.66397	1.24e-13	1.54e-12	20.2523
S100A2	1.98865	8.30065	7.66347	1.25e-13	1.55e-12	20.2489
ICA1	-0.832175	5.87698	-7.66241	1.26e-13	1.56e-12	20.2419
VTA1	0.370977	6.16448	7.6613	1.27e-13	1.57e-12	20.2344
MYOT	-0.425741	2.08778	-7.65965	1.28e-13	1.58e-12	20.2234
EXOSC4	0.454825	6.42486	7.65857	1.29e-13	1.59e-12	20.2162
TPM2	-1.03926	7.89219	-7.65719	1.3e-13	1.61e-12	20.2069
CENPK	0.552518	4.37442	7.65662	1.31e-13	1.61e-12	20.2031
TRPC1	-0.629337	3.68565	-7.65553	1.32e-13	1.62e-12	20.1958
TIMELESS	0.539063	6.27222	7.65528	1.32e-13	1.62e-12	20.1942
ACSS1	-0.688136	4.47332	-7.65485	1.32e-13	1.63e-12	20.1913
FYN	-0.68112	4.93717	-7.6518	1.35e-13	1.66e-12	20.1708
TNFSF8	-0.497348	2.47467	-7.65074	1.36e-13	1.67e-12	20.1637
GJB3	1.13715	6.00906	7.64931	1.38e-13	1.69e-12	20.1542
MICALL1	0.549032	6.52214	7.64819	1.39e-13	1.7e-12	20.1467
ST3GAL5	-0.968362	5.05865	-7.6478	1.39e-13	1.7e-12	20.1441
HNRNPK	0.32883	8.32315	7.64345	1.43e-13	1.75e-12	20.115
DIRAS3	-0.586752	2.46064	-7.64235	1.44e-13	1.76e-12	20.1077
HSD11B1	-0.836449	3.87764	-7.64107	1.46e-13	1.78e-12	20.0991
AACS	0.401776	4.47711	7.64066	1.46e-13	1.78e-12	20.0964
RBMS3	-0.57391	2.98024	-7.63883	1.48e-13	1.8e-12	20.0842
ZNF671	-0.583238	3.41405	-7.63872	1.48e-13	1.8e-12	20.0834
SIGMAR1	0.435183	6.36774	7.63769	1.49e-13	1.81e-12	20.0765
CHAF1A	0.460469	5.97832	7.6354	1.51e-13	1.84e-12	20.0612
PSMA4	0.368528	7.54449	7.63345	1.53e-13	1.87e-12	20.0482
TIMD4	-0.735349	2.59467	-7.62029	1.68e-13	2.04e-12	19.9604
ARPC1A	0.37399	8.7458	7.61927	1.69e-13	2.05e-12	19.9536
GAS6	-1.00066	6.17054	-7.60934	1.81e-13	2.19e-12	19.8875
SLAIN1	-0.712694	3.03557	-7.60607	1.85e-13	2.24e-12	19.8656
PCGF1	0.3471	5.54538	7.60383	1.88e-13	2.27e-12	19.8507
ZNF69	-0.747292	4.81041	-7.60349	1.88e-13	2.28e-12	19.8485
MRAS	-0.627626	3.89334	-7.60217	1.9e-13	2.3e-12	19.8397
ETV4	0.865504	5.14261	7.60034	1.92e-13	2.32e-12	19.8275
PHB2	0.3777	8.51696	7.59664	1.97e-13	2.38e-12	19.8029
FAM83H	0.680032	6.99221	7.59421	2e-13	2.42e-12	19.7867
MDH2	0.38841	8.57096	7.59297	2.02e-13	2.44e-12	19.7785
MRPS30	0.414601	6.03184	7.5911	2.05e-13	2.47e-12	19.7661
SPRR2E	1.62836	3.01624	7.58867	2.08e-13	2.51e-12	19.7499
RNASE7	1.15651	3.35127	7.58653	2.11e-13	2.54e-12	19.7357
FCRL1	-0.521569	2.00312	-7.5827	2.17e-13	2.61e-12	19.7102
DDIAS	0.601549	4.18195	7.58254	2.17e-13	2.61e-12	19.7092
TGFBR2	-0.671655	6.66622	-7.58091	2.19e-13	2.63e-12	19.6984
C1orf74	0.746266	4.61864	7.57997	2.21e-13	2.65e-12	19.6921
GAB3	-0.430773	2.58747	-7.57967	2.21e-13	2.65e-12	19.6901
CENPM	0.559315	4.85634	7.57709	2.25e-13	2.7e-12	19.673
SRPK1	0.471516	6.58309	7.57164	2.33e-13	2.8e-12	19.6368
NFIB	-0.758678	4.89377	-7.57076	2.35e-13	2.81e-12	19.631
CD22	-0.734345	2.6024	-7.56999	2.36e-13	2.82e-12	19.6259
CTTNBP2	-0.740596	2.72463	-7.56954	2.37e-13	2.83e-12	19.6228
GINS4	0.537639	3.49916	7.56929	2.37e-13	2.83e-12	19.6212
ADK	0.477609	6.50011	7.56921	2.37e-13	2.83e-12	19.6207
ZNF10	-0.469632	3.76764	-7.56744	2.4e-13	2.86e-12	19.6089
CCDC92	-0.470163	5.24572	-7.56693	2.41e-13	2.87e-12	19.6055
MLF2	0.34816	7.90461	7.56622	2.42e-13	2.88e-12	19.6008
FAM180A	-0.478478	2.13185	-7.5658	2.43e-13	2.89e-12	19.598
RND1	-0.640253	2.99184	-7.56565	2.43e-13	2.89e-12	19.5971
PNO1	0.36959	5.87935	7.56548	2.43e-13	2.89e-12	19.5959
FAM167B	-0.475274	3.89794	-7.56526	2.44e-13	2.89e-12	19.5944
ADRM1	0.361887	8.42976	7.56501	2.44e-13	2.9e-12	19.5928
MCM5	0.530428	6.36139	7.56464	2.45e-13	2.9e-12	19.5904
DSEL	-0.541946	2.89108	-7.56108	2.51e-13	2.97e-12	19.5668
VCAM1	-0.938781	5.00598	-7.5606	2.52e-13	2.98e-12	19.5636
IL6ST	-0.630518	5.8411	-7.55729	2.57e-13	3.04e-12	19.5416
COMP	-1.60062	5.52996	-7.55581	2.6e-13	3.07e-12	19.5318
BMS1	0.31552	6.431	7.55577	2.6e-13	3.07e-12	19.5316
TPK1	-0.397946	3.056	-7.55398	2.63e-13	3.11e-12	19.5197
TRIM8	-0.448022	7.32916	-7.54966	2.71e-13	3.2e-12	19.4911
AKAP13	-0.439992	5.80123	-7.54678	2.76e-13	3.26e-12	19.4721
RFWD3	0.46223	5.96587	7.54583	2.78e-13	3.27e-12	19.4658
RARA	-0.40438	5.31126	-7.54583	2.78e-13	3.27e-12	19.4657
HIC1	-0.533363	2.99789	-7.54561	2.78e-13	3.28e-12	19.4643
RPA3	0.50893	6.2208	7.54536	2.79e-13	3.28e-12	19.4627
KIF24	0.489417	3.44962	7.54309	2.83e-13	3.33e-12	19.4476
RILP	-0.434342	3.9151	-7.54089	2.87e-13	3.37e-12	19.4331
PHF5A	0.345001	6.41582	7.53956	2.9e-13	3.4e-12	19.4242
TRAIP	0.457651	4.32453	7.53817	2.93e-13	3.43e-12	19.4151
ZNF483	-0.362092	2.48064	-7.53769	2.94e-13	3.44e-12	19.4119
AGTRAP	0.505275	6.11253	7.53684	2.95e-13	3.46e-12	19.4063
AGT	-1.02623	3.76679	-7.53577	2.98e-13	3.48e-12	19.3992
APBB1	-0.621743	3.63225	-7.53541	2.98e-13	3.49e-12	19.3968
RHOU	-1.09205	5.94655	-7.53414	3.01e-13	3.51e-12	19.3884
ASB2	-0.693221	3.10587	-7.53281	3.04e-13	3.54e-12	19.3797
EPDR1	-0.88416	4.04809	-7.52955	3.1e-13	3.62e-12	19.3581
RCVRN	-0.1639	1.70278	-7.52834	3.13e-13	3.65e-12	19.3501
TECTA	-0.218702	2.11999	-7.52778	3.14e-13	3.66e-12	19.3464
KCNS2	-0.225332	1.84405	-7.52769	3.14e-13	3.66e-12	19.3458
FGL2	-0.926221	4.93183	-7.52531	3.19e-13	3.71e-12	19.3301
MPDZ	-0.604765	4.46446	-7.52392	3.22e-13	3.75e-12	19.3209
IL11RA	-0.561692	4.36669	-7.5173	3.37e-13	3.91e-12	19.2772
CEP85	0.510701	4.80005	7.51644	3.39e-13	3.93e-12	19.2715
TYMS	0.707351	6.75635	7.5155	3.41e-13	3.96e-12	19.2653
TSPAN11	-0.566902	2.74354	-7.5153	3.42e-13	3.96e-12	19.264
TPO	-0.308034	1.77874	-7.51421	3.44e-13	3.99e-12	19.2568
OTUB2	0.504004	3.13331	7.51233	3.49e-13	4.03e-12	19.2444
GPD1	-0.655586	2.37408	-7.50979	3.55e-13	4.1e-12	19.2276
MOAP1	-0.412664	5.54615	-7.50763	3.6e-13	4.16e-12	19.2134
FAM117A	-0.499864	4.28377	-7.50595	3.64e-13	4.2e-12	19.2023
ENPP4	-0.748322	4.13208	-7.50431	3.68e-13	4.25e-12	19.1915
STOML2	0.427187	8.54883	7.50144	3.75e-13	4.33e-12	19.1726
ACSM1	-0.324137	2.07458	-7.50097	3.76e-13	4.34e-12	19.1695
SERPINB1	0.883946	6.88701	7.49896	3.81e-13	4.39e-12	19.1563
PSMA1	0.357162	7.18354	7.49832	3.83e-13	4.41e-12	19.152
ITM2C	-0.831214	7.53001	-7.49806	3.84e-13	4.41e-12	19.1503
TESC	-1.28954	4.697	-7.49633	3.88e-13	4.46e-12	19.1389
B3GALT2	-0.267404	1.81432	-7.49336	3.96e-13	4.55e-12	19.1194
KRTDAP	2.09635	4.09173	7.49324	3.96e-13	4.55e-12	19.1186
MRPL17	0.341131	6.78495	7.493	3.97e-13	4.55e-12	19.117
KCMF1	0.269245	5.43421	7.49297	3.97e-13	4.55e-12	19.1168
POLR1A	0.359761	5.21315	7.49218	3.99e-13	4.57e-12	19.1116
EPB41L3	-0.740006	3.6783	-7.48937	4.07e-13	4.66e-12	19.0931
PPP1R9A	-0.804953	3.22878	-7.48755	4.12e-13	4.71e-12	19.0811
DPY19L2	-0.560597	2.62115	-7.4872	4.13e-13	4.72e-12	19.0789
MAP4K1	-0.74858	4.05665	-7.48553	4.18e-13	4.77e-12	19.0678
FGF18	-0.518419	2.39123	-7.48395	4.22e-13	4.81e-12	19.0575
UBL4A	0.437049	6.10938	7.48377	4.23e-13	4.82e-12	19.0563
RRP12	0.418601	5.70789	7.48111	4.3e-13	4.9e-12	19.0388
SELENBP1	-0.993861	5.1732	-7.48085	4.31e-13	4.91e-12	19.0371
SLC19A2	-0.643615	5.43243	-7.48065	4.31e-13	4.91e-12	19.0358
SIGIRR	-0.54399	5.09044	-7.48027	4.33e-13	4.92e-12	19.0332
NUP188	0.403885	6.37961	7.47974	4.34e-13	4.93e-12	19.0298
MTFR1L	-0.372642	5.78437	-7.47814	4.39e-13	4.98e-12	19.0193
NKAPL	-0.237038	1.94061	-7.47779	4.4e-13	4.99e-12	19.0169
FAM3B	-1.43285	4.07203	-7.47728	4.41e-13	5e-12	19.0136
IGDCC4	-0.468571	2.58047	-7.47645	4.44e-13	5.03e-12	19.0081
GGT5	-0.748847	4.55598	-7.47351	4.53e-13	5.13e-12	18.9888
CD28	-0.513754	2.7195	-7.47322	4.54e-13	5.13e-12	18.9869
PTPRN2	-0.575798	2.65732	-7.4672	4.72e-13	5.34e-12	18.9474
PHACTR1	-0.465354	2.64905	-7.46434	4.81e-13	5.44e-12	18.9286
NLN	0.454847	4.2801	7.46351	4.84e-13	5.47e-12	18.9231
PRDX1	0.437738	10.2963	7.46031	4.95e-13	5.58e-12	18.9022
CDH23	-0.628547	2.62735	-7.45648	5.07e-13	5.72e-12	18.8771
BTLA	-0.44142	2.34537	-7.45121	5.26e-13	5.92e-12	18.8425
DUSP19	-0.391013	2.99248	-7.44858	5.35e-13	6.03e-12	18.8253
MED6	0.325417	5.48745	7.44776	5.38e-13	6.05e-12	18.8199
CASD1	-0.419203	4.98589	-7.44596	5.45e-13	6.12e-12	18.8081
GPR155	-0.495698	3.34827	-7.44502	5.48e-13	6.16e-12	18.8019
SCN3A	-0.457878	2.03606	-7.43659	5.8e-13	6.51e-12	18.7468
VPS13C	-0.421844	5.00332	-7.4351	5.86e-13	6.57e-12	18.737
GFRA2	-0.422696	2.23266	-7.43369	5.91e-13	6.63e-12	18.7278
PBLD	-0.490069	4.37702	-7.4334	5.92e-13	6.64e-12	18.7259
STON1-GTF2A1L	-0.235003	1.67311	-7.43214	5.97e-13	6.69e-12	18.7176
VBP1	0.436422	6.8214	7.43025	6.05e-13	6.77e-12	18.7052
ARRB1	-0.635645	4.31284	-7.42684	6.19e-13	6.92e-12	18.6829
NUDCD1	0.423123	4.98943	7.42579	6.23e-13	6.97e-12	18.676
SSBP1	0.413542	6.69522	7.4232	6.34e-13	7.08e-12	18.6591
FABP5	1.29315	7.41124	7.42202	6.39e-13	7.13e-12	18.6514
MYBL2	0.713045	6.71745	7.422	6.39e-13	7.13e-12	18.6513
CENPQ	0.435596	4.8402	7.42089	6.44e-13	7.18e-12	18.6441
MYOC	-0.483457	1.93543	-7.41972	6.49e-13	7.23e-12	18.6364
IL17B	-0.255162	1.98583	-7.41942	6.5e-13	7.24e-12	18.6345
WDFY4	-0.596296	3.17261	-7.4178	6.57e-13	7.31e-12	18.6239
SLC25A23	-0.691387	5.277	-7.41281	6.8e-13	7.56e-12	18.5912
LCN10	-0.214862	1.70962	-7.41083	6.89e-13	7.65e-12	18.5783
TPSG1	-0.279292	1.84527	-7.4108	6.89e-13	7.65e-12	18.5782
PSMD11	0.424395	6.56169	7.41063	6.9e-13	7.65e-12	18.5771
DESI1	0.375718	5.6605	7.4101	6.92e-13	7.67e-12	18.5736
EPHA7	-0.666353	2.48666	-7.40958	6.94e-13	7.69e-12	18.5702
PTHLH	1.42333	4.48477	7.40809	7.01e-13	7.77e-12	18.5605
SERPINB3	2.19602	5.40295	7.40533	7.14e-13	7.9e-12	18.5424
FIGNL1	0.489494	4.16895	7.40495	7.16e-13	7.92e-12	18.54
NLGN3	-0.500766	2.68764	-7.4026	7.28e-13	8.04e-12	18.5247
COL19A1	-0.44804	1.94564	-7.40197	7.31e-13	8.07e-12	18.5205
BRIX1	0.458788	7.14456	7.40165	7.32e-13	8.08e-12	18.5185
C2orf88	-0.499049	2.66845	-7.40037	7.38e-13	8.14e-12	18.5101
SPTBN4	-0.323116	1.9107	-7.40017	7.39e-13	8.15e-12	18.5088
CD37	-0.868684	4.61344	-7.39798	7.5e-13	8.26e-12	18.4945
HEATR1	0.430322	5.72634	7.39735	7.53e-13	8.29e-12	18.4904
BUB3	0.350073	6.91412	7.3966	7.57e-13	8.33e-12	18.4855
SUOX	-0.499817	5.76238	-7.39643	7.58e-13	8.33e-12	18.4844
TP53I11	-0.58607	4.30847	-7.39547	7.63e-13	8.38e-12	18.4781
F8	-0.450192	2.98555	-7.39334	7.74e-13	8.49e-12	18.4643
ARMCX4	-0.510782	3.28936	-7.3931	7.75e-13	8.5e-12	18.4627
PHF1	-0.362631	5.59817	-7.39268	7.77e-13	8.52e-12	18.46
ABCA3	-0.78911	3.7262	-7.39207	7.8e-13	8.55e-12	18.456
ADIPOR2	0.38309	6.55725	7.3914	7.84e-13	8.58e-12	18.4517
FAM83B	0.880063	4.78518	7.38984	7.92e-13	8.66e-12	18.4415
GPR15	-0.641496	2.36627	-7.38916	7.96e-13	8.7e-12	18.437
LUM	-1.13171	8.6863	-7.38859	7.99e-13	8.73e-12	18.4334
TRAK2	-0.443913	5.68494	-7.38842	8e-13	8.73e-12	18.4322
SNTG2	-0.224585	1.7579	-7.38613	8.12e-13	8.86e-12	18.4173
DTYMK	0.474429	5.78977	7.38553	8.15e-13	8.89e-12	18.4134
DTWD1	-0.323759	3.73074	-7.38523	8.17e-13	8.9e-12	18.4115
PKP1	1.59583	5.902	7.38484	8.19e-13	8.91e-12	18.4089
XKR4	-0.259933	1.69829	-7.38481	8.19e-13	8.91e-12	18.4087
FBP1	-1.18359	6.90032	-7.38274	8.3e-13	9.03e-12	18.3953
COL8A1	-0.919916	5.15292	-7.38256	8.31e-13	9.03e-12	18.3941
EIF3I	0.315791	9.32841	7.38247	8.32e-13	9.03e-12	18.3935
MYL3	-0.352551	2.01621	-7.38243	8.32e-13	9.03e-12	18.3932
VAMP5	-0.766899	7.46467	-7.37761	8.59e-13	9.32e-12	18.3619
NCAPH	0.573686	4.9996	7.37747	8.6e-13	9.32e-12	18.361
LIFR	-0.728085	3.65095	-7.37655	8.65e-13	9.37e-12	18.355
NSUN2	0.433018	7.37015	7.37654	8.65e-13	9.37e-12	18.3549
GZMK	-0.924919	3.69474	-7.37525	8.73e-13	9.44e-12	18.3465
PSMD3	0.390981	7.52912	7.37513	8.74e-13	9.44e-12	18.3458
FYCO1	-0.502862	5.56064	-7.37288	8.87e-13	9.58e-12	18.3311
CLEC3A	-0.529369	1.81907	-7.37186	8.93e-13	9.64e-12	18.3245
POC1A	0.514309	5.05851	7.36877	9.11e-13	9.83e-12	18.3044
MAGI1	-0.598458	3.74227	-7.36649	9.25e-13	9.97e-12	18.2896
U2AF1L4	-0.389499	4.21912	-7.36536	9.32e-13	1e-11	18.2822
GNPNAT1	0.424065	5.23914	7.36445	9.38e-13	1.01e-11	18.2763
DISC1	-0.269585	2.1635	-7.36392	9.41e-13	1.01e-11	18.2729
NAALADL1	-0.475373	2.75158	-7.36216	9.52e-13	1.02e-11	18.2615
ARMCX1	-0.800583	4.54176	-7.36195	9.54e-13	1.02e-11	18.2601
MAP2K1	0.354399	6.98605	7.36083	9.61e-13	1.03e-11	18.2528
SAAL1	0.397158	5.50489	7.36081	9.61e-13	1.03e-11	18.2526
PPM1G	0.325043	7.76682	7.3559	9.93e-13	1.06e-11	18.2208
GPER1	-0.48243	2.58205	-7.35586	9.93e-13	1.06e-11	18.2205
PDCD10	0.378685	6.57972	7.35488	9.99e-13	1.07e-11	18.2142
RGS7BP	-0.297083	1.83685	-7.35476	1e-12	1.07e-11	18.2134
PLXDC2	-0.741547	4.86876	-7.3537	1.01e-12	1.08e-11	18.2065
THBS1	-0.937121	8.11964	-7.35217	1.02e-12	1.09e-11	18.1966
PRELID1	0.339811	7.30214	7.35181	1.02e-12	1.09e-11	18.1942
TTPAL	0.447042	4.77115	7.34963	1.03e-12	1.1e-11	18.1801
FAM189B	0.391858	5.23165	7.34746	1.05e-12	1.12e-11	18.1661
ADCY2	-0.429845	1.97163	-7.34545	1.06e-12	1.13e-11	18.153
KIAA0513	-0.538345	3.98732	-7.34454	1.07e-12	1.14e-11	18.1471
SERPINB5	1.32782	6.70872	7.34174	1.09e-12	1.16e-11	18.129
PTPRD	-0.712779	2.69277	-7.34158	1.09e-12	1.16e-11	18.1279
SNAP25	-0.675291	2.56493	-7.33835	1.12e-12	1.19e-11	18.107
DIAPH1	0.424339	7.81358	7.33666	1.13e-12	1.2e-11	18.096
SLC27A1	-0.439753	4.62645	-7.33515	1.14e-12	1.21e-11	18.0863
GP1BA	-0.541413	2.75889	-7.33433	1.15e-12	1.22e-11	18.081
POLR2D	0.344087	5.42298	7.33142	1.17e-12	1.24e-11	18.0621
KHSRP	0.346229	7.73884	7.32605	1.21e-12	1.28e-11	18.0273
CCDC60	-0.590443	2.10056	-7.32597	1.21e-12	1.28e-11	18.0268
ZNF358	-0.532808	7.22722	-7.32589	1.21e-12	1.28e-11	18.0263
GBP6	1.21084	3.55553	7.32552	1.21e-12	1.28e-11	18.0239
PPP1CA	0.413314	8.55913	7.32525	1.22e-12	1.29e-11	18.0222
LTBP4	-0.772349	5.97519	-7.32322	1.23e-12	1.3e-11	18.009
SF3B6	0.376619	8.36136	7.32299	1.23e-12	1.3e-11	18.0076
FAT2	1.3778	4.43813	7.32294	1.24e-12	1.3e-11	18.0072
SLC52A2	0.415191	6.77621	7.32106	1.25e-12	1.32e-11	17.9951
FARSA	0.347916	7.30434	7.31885	1.27e-12	1.34e-11	17.9808
EIF4EBP1	0.59391	7.08543	7.31842	1.27e-12	1.34e-11	17.978
SLC16A4	-0.641473	2.98498	-7.31688	1.29e-12	1.35e-11	17.968
GAST	0.47337	1.86884	7.31634	1.29e-12	1.36e-11	17.9645
FAM110D	-0.443108	2.55301	-7.31615	1.29e-12	1.36e-11	17.9634
PDHA1	0.327483	7.26039	7.31592	1.29e-12	1.36e-11	17.9619
GIMAP6	-0.566213	3.57485	-7.31406	1.31e-12	1.37e-11	17.9498
RWDD2A	-0.350089	3.53635	-7.31098	1.34e-12	1.4e-11	17.9299
CD19	-0.823806	2.61703	-7.31091	1.34e-12	1.4e-11	17.9295
SYNC	-0.60319	3.14641	-7.30915	1.35e-12	1.42e-11	17.9181
CASP14	1.78639	4.23417	7.3091	1.35e-12	1.42e-11	17.9178
HNRNPAB	0.341067	8.85088	7.30309	1.41e-12	1.47e-11	17.8789
PLCB3	0.38975	6.20692	7.3022	1.42e-12	1.48e-11	17.8733
ADAMTS4	-0.864708	4.33264	-7.30205	1.42e-12	1.48e-11	17.8723
PTGES3	0.416138	8.11539	7.30152	1.42e-12	1.49e-11	17.8688
CD96	-0.757444	3.99822	-7.30142	1.42e-12	1.49e-11	17.8682
DNAJC9	0.439828	5.77992	7.30021	1.44e-12	1.5e-11	17.8604
KCNT2	-0.361538	2.30844	-7.29844	1.45e-12	1.51e-11	17.849
TRPC3	-0.359462	2.09259	-7.298	1.46e-12	1.52e-11	17.8461
SIDT1	-0.737907	3.42494	-7.29645	1.47e-12	1.53e-11	17.8361
ST6GAL2	-0.412295	2.10362	-7.29345	1.5e-12	1.56e-11	17.8168
ATP1B3	0.522116	8.44668	7.29297	1.51e-12	1.57e-11	17.8137
THOP1	0.422501	5.73151	7.29007	1.53e-12	1.59e-11	17.795
RPL39	0.44321	8.32821	7.28954	1.54e-12	1.6e-11	17.7916
XDH	0.994065	4.55501	7.28873	1.55e-12	1.61e-11	17.7864
PSMD10	0.358555	6.56079	7.28853	1.55e-12	1.61e-11	17.7851
PROK1	-0.415165	1.88369	-7.28696	1.57e-12	1.62e-11	17.775
NHLRC4	-0.229717	1.96052	-7.28631	1.57e-12	1.63e-11	17.7708
SECISBP2L	-0.386656	5.32337	-7.28499	1.59e-12	1.64e-11	17.7623
PLCD4	-0.495439	2.6075	-7.2832	1.61e-12	1.66e-11	17.7507
CTSF	-0.676466	5.95678	-7.28181	1.62e-12	1.68e-11	17.7418
ABCA6	-0.753996	3.15327	-7.27851	1.66e-12	1.71e-11	17.7206
SOCS3	-0.760952	6.68006	-7.27766	1.67e-12	1.72e-11	17.715
CREB3L1	-0.807525	5.0565	-7.27589	1.68e-12	1.74e-11	17.7037
GIMAP8	-0.643212	4.18985	-7.27481	1.7e-12	1.75e-11	17.6967
PTRH2	0.336257	5.49695	7.27434	1.7e-12	1.75e-11	17.6937
DIO3	-0.6525	2.41318	-7.27309	1.72e-12	1.77e-11	17.6856
MVB12B	-0.471392	3.86	-7.27301	1.72e-12	1.77e-11	17.6851
PYROXD2	-0.645876	3.87928	-7.27203	1.73e-12	1.78e-11	17.6788
PRRT2	-0.605259	2.93367	-7.2708	1.74e-12	1.79e-11	17.6709
JDP2	-0.54052	4.28091	-7.26918	1.76e-12	1.81e-11	17.6605
PLEKHO1	-0.680808	6.10479	-7.26481	1.81e-12	1.86e-11	17.6324
ZNF831	-0.3467	1.92792	-7.26371	1.83e-12	1.87e-11	17.6254
ATP8A1	-0.556269	3.21032	-7.26219	1.84e-12	1.89e-11	17.6156
PLEKHO2	-0.540771	5.77436	-7.25946	1.88e-12	1.92e-11	17.598
NCOA1	-0.402808	5.31423	-7.25829	1.89e-12	1.94e-11	17.5905
MAP3K3	-0.367794	4.73558	-7.25709	1.91e-12	1.95e-11	17.5828
FAM162B	-0.613693	3.15449	-7.25624	1.92e-12	1.96e-11	17.5773
MMP19	-0.670462	3.84782	-7.25607	1.92e-12	1.96e-11	17.5762
GAR1	0.331776	5.89716	7.25554	1.93e-12	1.97e-11	17.5728
SQLE	0.625752	6.40422	7.25427	1.94e-12	1.98e-11	17.5647
SMPD1	-0.470865	5.47136	-7.25422	1.94e-12	1.98e-11	17.5643
DVL1	0.366578	5.79772	7.25299	1.96e-12	2e-11	17.5564
MTFR1	0.437561	5.64391	7.2528	1.96e-12	2e-11	17.5552
PPP1R32	-0.333769	2.68064	-7.25191	1.97e-12	2.01e-11	17.5495
GCSAML	-0.206207	1.7579	-7.24669	2.04e-12	2.08e-11	17.516
ATL2	0.451202	5.85967	7.24571	2.05e-12	2.09e-11	17.5097
LSM12	0.308308	3.85084	7.24529	2.06e-12	2.09e-11	17.5071
P2RY10	-0.580488	2.6817	-7.24517	2.06e-12	2.09e-11	17.5063
PPM1H	-0.865318	3.87425	-7.24332	2.09e-12	2.12e-11	17.4944
CEP85L	-0.389063	3.27263	-7.24316	2.09e-12	2.12e-11	17.4934
JUNB	-0.496493	8.06944	-7.23558	2.2e-12	2.23e-11	17.4448
ZMYND19	0.380776	5.77613	7.235	2.2e-12	2.23e-11	17.4411
HTR2B	-0.50389	2.5231	-7.2344	2.21e-12	2.24e-11	17.4372
KL	-0.618253	2.43694	-7.23357	2.22e-12	2.25e-11	17.4319
HSPA8	0.496288	10.3742	7.22887	2.29e-12	2.32e-11	17.4018
PPP1R14C	1.2138	3.91677	7.22882	2.3e-12	2.32e-11	17.4015
ISM1	-0.731154	3.52315	-7.22761	2.31e-12	2.34e-11	17.3937
GEMIN5	0.334139	5.04497	7.22757	2.31e-12	2.34e-11	17.3935
CCNC	0.368987	5.5288	7.22609	2.34e-12	2.36e-11	17.384
SH3RF2	0.814777	3.5579	7.22463	2.36e-12	2.38e-11	17.3746
PSMA2	0.319196	6.01131	7.22041	2.43e-12	2.44e-11	17.3476
USP10	0.328669	6.45223	7.21282	2.55e-12	2.57e-11	17.2991
SMIM10	-0.571084	3.37066	-7.21274	2.55e-12	2.57e-11	17.2986
MRPL22	0.311922	5.49423	7.2116	2.57e-12	2.58e-11	17.2913
LEF1	-0.638715	3.54594	-7.21121	2.58e-12	2.59e-11	17.2888
UTRN	-0.548842	4.96716	-7.20986	2.6e-12	2.61e-11	17.2802
TLR10	-0.455573	2.04197	-7.20257	2.73e-12	2.74e-11	17.2336
SF3B3	0.396745	7.17934	7.20099	2.75e-12	2.76e-11	17.2235
KCNK3	-0.585433	2.56048	-7.20066	2.76e-12	2.77e-11	17.2214
ZDHHC12	0.472549	6.17947	7.19623	2.84e-12	2.85e-11	17.1932
JAK3	-0.597962	4.1793	-7.19475	2.87e-12	2.87e-11	17.1837
GPN1	0.349636	6.58043	7.19232	2.91e-12	2.92e-11	17.1682
TTLL1	-0.390644	4.1467	-7.18744	3.01e-12	3.01e-11	17.1371
PSPH	0.545553	4.77883	7.1874	3.01e-12	3.01e-11	17.1369
PDGFRL	-0.880618	3.95804	-7.18712	3.01e-12	3.01e-11	17.1351
BIN1	-0.834813	5.2322	-7.18622	3.03e-12	3.03e-11	17.1294
SSUH2	-0.161094	1.78234	-7.18483	3.06e-12	3.05e-11	17.1205
CALD1	-0.905202	7.58121	-7.18402	3.08e-12	3.07e-11	17.1153
BICD2	0.506164	6.04657	7.1832	3.09e-12	3.08e-11	17.1101
NISCH	-0.442647	6.36216	-7.18187	3.12e-12	3.11e-11	17.1016
PLP2	0.606536	9.10383	7.1813	3.13e-12	3.12e-11	17.098
PHLDB1	-0.575428	4.48083	-7.18111	3.13e-12	3.12e-11	17.0968
PLIN3	0.452115	7.0807	7.17996	3.16e-12	3.14e-11	17.0895
RRS1	0.435669	6.4104	7.17947	3.17e-12	3.15e-11	17.0863
GLI2	-0.600934	2.7438	-7.17928	3.17e-12	3.15e-11	17.0851
PGPEP1	-0.443868	3.73378	-7.1784	3.19e-12	3.17e-11	17.0795
SGSM1	-0.611785	2.66862	-7.17791	3.2e-12	3.18e-11	17.0764
RAB11FIP2	-0.433755	4.4732	-7.17776	3.2e-12	3.18e-11	17.0754
CCDC51	0.362016	5.12626	7.17692	3.22e-12	3.19e-11	17.0701
MAS1L	-0.231849	1.7565	-7.17647	3.23e-12	3.2e-11	17.0672
POP7	0.352508	6.77073	7.17193	3.33e-12	3.29e-11	17.0383
PREX1	-0.581446	4.89824	-7.17044	3.36e-12	3.32e-11	17.0288
MEF2D	-0.350391	5.70357	-7.16926	3.39e-12	3.35e-11	17.0213
CD79A	-1.19383	4.21525	-7.16846	3.4e-12	3.36e-11	17.0162
IRAK3	-0.60124	3.59428	-7.16757	3.42e-12	3.38e-11	17.0106
DNAJC11	0.350727	5.51255	7.1671	3.43e-12	3.39e-11	17.0076
TIMM23	0.320702	7.89356	7.16695	3.44e-12	3.39e-11	17.0066
COA6	0.364608	5.82993	7.16603	3.46e-12	3.41e-11	17.0008
RBL1	0.416759	4.56038	7.1644	3.5e-12	3.44e-11	16.9904
C3	-1.23607	7.80079	-7.1626	3.54e-12	3.48e-11	16.979
EEPD1	-0.581005	3.82155	-7.16163	3.56e-12	3.5e-11	16.9728
PRNP	0.785709	8.68006	7.16128	3.57e-12	3.51e-11	16.9706
VWF	-0.674657	7.08915	-7.15891	3.62e-12	3.56e-11	16.9555
MASTL	0.441958	5.73648	7.15873	3.63e-12	3.56e-11	16.9543
VASN	-0.763274	5.11212	-7.15652	3.68e-12	3.61e-11	16.9404
ROR1	-0.627501	2.98372	-7.15619	3.69e-12	3.62e-11	16.9382
SRP72	0.340825	7.16715	7.15592	3.69e-12	3.62e-11	16.9365
CREB3L2	-0.522833	6.00485	-7.15507	3.71e-12	3.64e-11	16.9311
GJB6	1.5972	6.41677	7.1541	3.74e-12	3.66e-11	16.925
TMEM220	-0.416861	2.59899	-7.15285	3.77e-12	3.69e-11	16.917
TOMM5	0.453018	6.0581	7.15006	3.84e-12	3.75e-11	16.8993
UCHL3	0.429794	6.14785	7.14741	3.9e-12	3.81e-11	16.8825
ZNF471	-0.502014	2.79964	-7.14709	3.91e-12	3.82e-11	16.8805
KLK8	1.14466	2.6597	7.14164	4.05e-12	3.96e-11	16.8458
EIF4A3	0.384367	7.88705	7.14146	4.06e-12	3.96e-11	16.8447
NDUFB9	0.444603	8.68217	7.14087	4.07e-12	3.97e-11	16.841
PLD4	-0.460863	2.40928	-7.13268	4.3e-12	4.18e-11	16.7891
TATDN1	0.397957	5.16562	7.13263	4.3e-12	4.18e-11	16.7887
PIWIL4	-0.50028	2.91083	-7.13193	4.32e-12	4.2e-11	16.7843
GADD45G	-0.699841	4.2436	-7.13006	4.37e-12	4.25e-11	16.7724
FGD5	-0.669225	4.09106	-7.12937	4.39e-12	4.27e-11	16.7681
GPRIN3	-0.464844	2.92548	-7.12907	4.4e-12	4.27e-11	16.7662
OR52N4	-0.29014	1.85901	-7.12889	4.4e-12	4.27e-11	16.7651
SMAP2	-0.485245	6.29518	-7.12826	4.42e-12	4.29e-11	16.761
FERMT1	0.857913	6.29528	7.1254	4.5e-12	4.37e-11	16.743
NMU	1.13413	4.20892	7.12478	4.52e-12	4.38e-11	16.7391
FGD3	-0.748658	5.24394	-7.12345	4.56e-12	4.42e-11	16.7306
SNRPA1	0.334008	6.52044	7.12338	4.56e-12	4.42e-11	16.7301
TUBB	0.415882	10.0042	7.1226	4.59e-12	4.44e-11	16.7252
ANKDD1A	-0.56923	4.15786	-7.12142	4.62e-12	4.47e-11	16.7178
GTF3C4	0.363681	4.94382	7.12037	4.65e-12	4.49e-11	16.7111
HHIP	-0.519351	2.15745	-7.12033	4.65e-12	4.49e-11	16.7109
FANCG	0.465056	5.89805	7.11973	4.67e-12	4.51e-11	16.7071
FTSJ1	0.3469	5.95963	7.11902	4.69e-12	4.53e-11	16.7026
CNR1	-0.432496	2.04278	-7.11883	4.7e-12	4.53e-11	16.7014
HECTD2	-0.386578	3.46196	-7.11694	4.76e-12	4.58e-11	16.6894
CA3	-0.472637	2.24422	-7.11313	4.88e-12	4.69e-11	16.6653
SLC35F2	0.603964	4.96852	7.11132	4.93e-12	4.75e-11	16.6539
AMY2B	-0.483402	3.56935	-7.11126	4.94e-12	4.75e-11	16.6535
CLEC1A	-0.467284	2.61922	-7.1112	4.94e-12	4.75e-11	16.6531
MRPS18C	0.324229	5.06224	7.1094	4.99e-12	4.8e-11	16.6418
CLSPN	0.587514	4.14594	7.10884	5.01e-12	4.81e-11	16.6382
HERPUD1	-0.483116	7.01347	-7.10609	5.1e-12	4.9e-11	16.6208
CSTA	1.22448	6.98391	7.10396	5.17e-12	4.96e-11	16.6074
MRPL15	0.404165	7.9934	7.10233	5.23e-12	5.01e-11	16.5971
TBC1D31	0.367182	4.41882	7.10146	5.26e-12	5.04e-11	16.5916
GLIS2	-0.61966	4.35447	-7.10073	5.28e-12	5.06e-11	16.5869
CCNE2	0.627236	3.87395	7.10031	5.3e-12	5.07e-11	16.5843
GJC2	-0.482674	3.02458	-7.09961	5.32e-12	5.09e-11	16.5799
KCNA3	-0.358064	2.14906	-7.09959	5.32e-12	5.09e-11	16.5798
TOX	-0.672836	3.15849	-7.09906	5.34e-12	5.1e-11	16.5764
SYNCRIP	0.354177	6.72243	7.09687	5.42e-12	5.17e-11	16.5626
PHYKPL	-0.344771	4.19094	-7.09465	5.49e-12	5.24e-11	16.5486
HMBS	0.394095	5.72029	7.09463	5.5e-12	5.24e-11	16.5485
BEST1	-0.326757	2.51596	-7.0913	5.61e-12	5.35e-11	16.5274
COL24A1	-0.455944	2.87841	-7.09098	5.63e-12	5.36e-11	16.5254
CHN2	-0.490928	2.69227	-7.08998	5.66e-12	5.39e-11	16.5191
GIMAP4	-0.698746	5.31075	-7.08934	5.69e-12	5.41e-11	16.5151
PRIM1	0.492329	5.34217	7.08881	5.71e-12	5.42e-11	16.5118
DCUN1D5	0.523535	6.12452	7.08852	5.72e-12	5.43e-11	16.5099
KIAA1755	-0.547722	2.70497	-7.08777	5.74e-12	5.45e-11	16.5052
USP5	0.374904	7.74713	7.08776	5.74e-12	5.45e-11	16.5051
PDCD5	0.420948	7.37713	7.08504	5.85e-12	5.54e-11	16.488
P2RY8	-0.490366	2.7089	-7.08373	5.9e-12	5.59e-11	16.4797
EIF4E3	-0.469209	3.98421	-7.08174	5.97e-12	5.66e-11	16.4672
MRPL2	0.359138	5.81332	7.08102	6e-12	5.68e-11	16.4626
POLA2	0.403498	5.65859	7.0802	6.03e-12	5.71e-11	16.4575
SMTN	-0.673554	5.39637	-7.0786	6.09e-12	5.76e-11	16.4474
TSPAN33	-0.606225	5.15537	-7.07782	6.12e-12	5.79e-11	16.4425
FH	0.35695	7.84317	7.07736	6.14e-12	5.8e-11	16.4395
PLCB2	-0.611958	3.9105	-7.07667	6.17e-12	5.83e-11	16.4352
MRPL32	0.301761	6.50401	7.07587	6.2e-12	5.85e-11	16.4302
FLI1	-0.562639	4.10522	-7.07568	6.21e-12	5.86e-11	16.429
ADAMTSL1	-0.530828	2.50101	-7.07507	6.23e-12	5.88e-11	16.4251
CSF2RA	-0.673308	4.46695	-7.0732	6.31e-12	5.94e-11	16.4134
FBLN2	-0.994285	5.45706	-7.07232	6.35e-12	5.97e-11	16.4079
PFKP	0.600413	7.97085	7.0695	6.46e-12	6.08e-11	16.3901
PINX1	0.28059	3.76684	7.06747	6.55e-12	6.16e-11	16.3773
HMGA2	0.885219	2.71781	7.06684	6.57e-12	6.18e-11	16.3734
EXOSC9	0.331865	5.80349	7.06638	6.59e-12	6.19e-11	16.3704
SERPINB7	1.0229	2.7362	7.06533	6.64e-12	6.23e-11	16.3639
S100A10	0.910789	9.53125	7.06386	6.7e-12	6.29e-11	16.3546
CARNS1	-0.277714	2.02255	-7.06268	6.75e-12	6.33e-11	16.3472
PKD1L1	-0.525595	2.47266	-7.06218	6.77e-12	6.35e-11	16.3441
PRPH	-0.385881	1.82614	-7.06084	6.83e-12	6.4e-11	16.3356
RRP1B	0.388382	5.83681	7.0576	6.98e-12	6.53e-11	16.3152
CHCHD2	0.347162	9.94334	7.05548	7.07e-12	6.62e-11	16.3019
NOC3L	0.32513	5.28482	7.05543	7.08e-12	6.62e-11	16.3016
MYADM	-0.816076	5.75324	-7.04596	7.52e-12	7.03e-11	16.2422
CARF	-0.298354	3.07777	-7.04534	7.55e-12	7.05e-11	16.2383
AP2S1	0.387745	8.13446	7.04531	7.55e-12	7.05e-11	16.2381
RAB23	-0.622899	4.34352	-7.04138	7.74e-12	7.22e-11	16.2134
ZNF248	-0.359534	3.87246	-7.0387	7.88e-12	7.35e-11	16.1966
SCN4B	-0.544471	2.83556	-7.03746	7.94e-12	7.4e-11	16.1888
COLGALT2	-0.412765	2.09169	-7.03679	7.98e-12	7.43e-11	16.1847
DNMT1	0.50015	7.24581	7.03637	8e-12	7.44e-11	16.182
MYOZ1	-0.440819	2.24898	-7.03373	8.13e-12	7.57e-11	16.1654
VIT	-0.56234	2.06159	-7.03254	8.2e-12	7.62e-11	16.158
PARVG	-0.679396	3.89756	-7.03087	8.29e-12	7.7e-11	16.1475
CLIC2	-0.590023	4.29249	-7.0295	8.36e-12	7.76e-11	16.1389
CNTN3	-0.736371	2.72098	-7.02871	8.4e-12	7.8e-11	16.134
TCEAL5	-0.577574	2.20336	-7.0274	8.47e-12	7.86e-11	16.1258
PAK1IP1	0.389507	6.7776	7.02664	8.51e-12	7.89e-11	16.121
RORA	-0.437353	3.04621	-7.02629	8.53e-12	7.91e-11	16.1188
GLB1L	-0.389325	3.86861	-7.02545	8.58e-12	7.94e-11	16.1136
UBQLNL	-0.303387	2.28612	-7.02507	8.6e-12	7.96e-11	16.1112
CRACR2B	-0.841902	4.27732	-7.02489	8.61e-12	7.96e-11	16.1101
RFC5	0.438979	5.68577	7.02379	8.67e-12	8.01e-11	16.1032
VPREB3	-0.819224	2.96443	-7.02227	8.75e-12	8.09e-11	16.0937
LEO1	0.364842	6.184	7.01909	8.94e-12	8.25e-11	16.0738
RAB38	1.09404	5.54666	7.01771	9.01e-12	8.32e-11	16.0651
IGF2BP2	1.00197	5.01617	7.01692	9.06e-12	8.36e-11	16.0602
ZNF846	-0.417834	3.77537	-7.01044	9.44e-12	8.71e-11	16.0197
ASCC3	0.402959	5.7595	7.00888	9.54e-12	8.79e-11	16.0099
GAB2	-0.554693	4.26101	-7.00814	9.58e-12	8.83e-11	16.0053
TMEM201	0.320967	4.15062	7.00804	9.59e-12	8.83e-11	16.0047
AIFM1	0.275008	6.24066	7.00465	9.8e-12	9.01e-11	15.9835
CDO1	-0.617014	2.47102	-7.00193	9.97e-12	9.17e-11	15.9665
ETS1	-0.585178	6.38867	-7.00086	1e-11	9.22e-11	15.9598
NAV3	-0.496041	2.47489	-6.99965	1.01e-11	9.29e-11	15.9523
PPM1L	-0.547687	3.39741	-6.9996	1.01e-11	9.29e-11	15.9519
GAS1	-1.05213	4.2496	-6.99779	1.02e-11	9.39e-11	15.9406
CLEC11A	-0.761931	4.95119	-6.99529	1.04e-11	9.54e-11	15.9251
MMP23B	-0.233544	1.90936	-6.99497	1.04e-11	9.55e-11	15.923
MRPL47	0.355074	6.98539	6.99468	1.04e-11	9.57e-11	15.9212
SMS	0.508774	8.17825	6.99214	1.06e-11	9.72e-11	15.9054
G2E3	0.347792	4.42852	6.99147	1.07e-11	9.75e-11	15.9012
CSNK2A1	0.343648	6.5627	6.99038	1.07e-11	9.81e-11	15.8944
HSPA4	0.34609	7.63395	6.98931	1.08e-11	9.88e-11	15.8877
AJUBA	0.638504	4.66682	6.98811	1.09e-11	9.95e-11	15.8803
DGKB	-0.31021	1.96703	-6.98682	1.1e-11	1e-10	15.8722
DSC3	1.75964	5.07937	6.9853	1.11e-11	1.01e-10	15.8628
COPS3	0.402075	7.00377	6.98523	1.11e-11	1.01e-10	15.8623
ABCB5	-0.195341	1.69068	-6.98397	1.12e-11	1.02e-10	15.8544
KIF22	0.457993	6.43562	6.98206	1.13e-11	1.03e-10	15.8425
MGME1	0.374353	6.25978	6.98142	1.14e-11	1.03e-10	15.8385
TEAD4	0.671678	5.3956	6.98004	1.15e-11	1.04e-10	15.8299
OLA1	0.304423	5.84743	6.97998	1.15e-11	1.04e-10	15.8296
CYC1	0.422174	8.54488	6.97787	1.16e-11	1.06e-10	15.8164
DUSP26	-0.311726	1.89109	-6.97698	1.17e-11	1.06e-10	15.8109
ILF2	0.398663	9.23537	6.9766	1.17e-11	1.06e-10	15.8085
FAM91A1	0.393571	5.69149	6.97605	1.18e-11	1.07e-10	15.8051
RPUSD2	0.29006	5.11073	6.97453	1.19e-11	1.08e-10	15.7956
LARP1	0.31932	7.66763	6.97296	1.2e-11	1.09e-10	15.7859
HCCS	0.336192	5.9605	6.97107	1.21e-11	1.1e-10	15.7741
LETM1	0.364684	6.18056	6.96907	1.23e-11	1.11e-10	15.7616
MXRA8	-0.868495	5.3876	-6.96836	1.24e-11	1.12e-10	15.7573
MTIF2	0.313956	6.47793	6.96823	1.24e-11	1.12e-10	15.7564
F13A1	-1.01058	5.31674	-6.96806	1.24e-11	1.12e-10	15.7554
SULT2B1	1.07364	3.67515	6.96744	1.24e-11	1.12e-10	15.7515
GNG2	-0.561452	3.34347	-6.96675	1.25e-11	1.13e-10	15.7472
KLHL3	-0.450163	3.36513	-6.96619	1.25e-11	1.13e-10	15.7438
FANCD2	0.492812	5.39162	6.96578	1.26e-11	1.13e-10	15.7412
RYR3	-0.40446	2.19675	-6.96502	1.26e-11	1.14e-10	15.7365
NUP35	0.320856	4.46602	6.96403	1.27e-11	1.14e-10	15.7303
EVL	-0.543365	6.13279	-6.96171	1.29e-11	1.16e-10	15.7159
JADE1	-0.45756	4.43789	-6.96051	1.3e-11	1.17e-10	15.7084
PKD1	-0.419899	4.76605	-6.96019	1.3e-11	1.17e-10	15.7065
EPHB4	0.491899	6.17989	6.95731	1.33e-11	1.19e-10	15.6885
CD1D	-0.469017	2.77191	-6.95623	1.33e-11	1.2e-10	15.6819
GPI	0.457334	8.38261	6.9556	1.34e-11	1.2e-10	15.6779
B4GALT2	0.360229	6.16436	6.95353	1.36e-11	1.22e-10	15.665
IL22RA1	0.685604	3.48888	6.94976	1.39e-11	1.25e-10	15.6416
XPOT	0.418815	6.92356	6.94972	1.39e-11	1.25e-10	15.6414
VAT1L	-0.493537	2.45711	-6.94917	1.4e-11	1.25e-10	15.638
TLR7	-0.528232	2.89527	-6.94795	1.41e-11	1.26e-10	15.6304
POLE	0.423756	5.79964	6.94674	1.42e-11	1.27e-10	15.6229
EIF2S2	0.347422	7.28634	6.94663	1.42e-11	1.27e-10	15.6222
FGF14	-0.235182	1.77226	-6.94647	1.42e-11	1.27e-10	15.6212
FAM171A1	-0.830738	4.53744	-6.94631	1.42e-11	1.27e-10	15.6202
TSPAN7	-1.05628	4.33881	-6.9458	1.43e-11	1.27e-10	15.6171
RCC1	0.445246	6.52094	6.94492	1.43e-11	1.28e-10	15.6116
ZNF442	-0.292002	2.70961	-6.94449	1.44e-11	1.28e-10	15.6089
TIMP2	-0.885119	7.26652	-6.94422	1.44e-11	1.28e-10	15.6073
ADAMTSL2	-0.584174	3.99543	-6.94098	1.47e-11	1.31e-10	15.5872
EIF4E	0.338052	4.1679	6.93892	1.49e-11	1.33e-10	15.5744
TIMM17A	0.292256	6.25324	6.93815	1.5e-11	1.33e-10	15.5696
FAM3C	0.576432	5.83838	6.936	1.52e-11	1.35e-10	15.5563
TPSD1	-0.680714	2.61254	-6.93386	1.54e-11	1.37e-10	15.543
EFCAB6	-0.249984	2.11251	-6.93325	1.55e-11	1.37e-10	15.5392
TNFSF4	-0.495734	2.75931	-6.93169	1.56e-11	1.39e-10	15.5296
KLF17	-0.254352	1.86083	-6.92996	1.58e-11	1.4e-10	15.5188
MRGBP	0.38992	6.30452	6.92943	1.58e-11	1.4e-10	15.5156
CCL2	-0.991177	6.19706	-6.92899	1.59e-11	1.41e-10	15.5128
SLC43A1	-0.600254	4.01229	-6.92761	1.6e-11	1.42e-10	15.5043
JUP	0.741974	8.62334	6.92712	1.61e-11	1.42e-10	15.5013
FAM124B	-0.333401	2.20639	-6.92703	1.61e-11	1.42e-10	15.5007
DPP3	0.40397	6.49628	6.92661	1.61e-11	1.43e-10	15.4981
SOX8	-0.399358	2.03475	-6.92172	1.66e-11	1.47e-10	15.4679
LZTS1	-0.537228	3.2096	-6.92089	1.67e-11	1.48e-10	15.4627
HMGCLL1	-0.165402	1.67742	-6.92041	1.68e-11	1.48e-10	15.4597
SDC2	-0.720064	5.24618	-6.91825	1.7e-11	1.5e-10	15.4463
NUDT5	0.397531	7.11243	6.91606	1.72e-11	1.52e-10	15.4328
SLC6A16	-0.504182	2.62016	-6.91542	1.73e-11	1.53e-10	15.4289
PDK2	-0.383829	4.89681	-6.91366	1.75e-11	1.54e-10	15.418
ZBTB4	-0.383921	5.8534	-6.91232	1.76e-11	1.55e-10	15.4097
PNMA2	-0.471275	2.20603	-6.91139	1.77e-11	1.56e-10	15.404
ANKRD10	-0.439243	6.56376	-6.91081	1.78e-11	1.57e-10	15.4004
SHANK3	-0.501086	5.12172	-6.90755	1.82e-11	1.6e-10	15.3802
ISCU	-0.313855	6.23361	-6.90429	1.86e-11	1.63e-10	15.3601
ITK	-0.670929	3.26478	-6.90408	1.86e-11	1.63e-10	15.3588
COL8A2	-0.742449	4.269	-6.90286	1.87e-11	1.64e-10	15.3513
TNNT1	1.28923	4.26132	6.90087	1.9e-11	1.66e-10	15.3389
ZNF775	-0.3645	3.54498	-6.89901	1.92e-11	1.68e-10	15.3275
PTP4A3	-0.552906	4.66546	-6.89851	1.93e-11	1.69e-10	15.3244
SCUBE3	-0.583391	2.56476	-6.89601	1.96e-11	1.71e-10	15.309
VSIG2	-1.6311	6.1337	-6.89393	1.98e-11	1.74e-10	15.2961
POLR3GL	-0.393482	6.51495	-6.89151	2.01e-11	1.76e-10	15.2812
TKT	0.518474	7.97922	6.89097	2.02e-11	1.77e-10	15.2779
PIP5K1B	-0.609063	2.76037	-6.89061	2.02e-11	1.77e-10	15.2756
FADD	0.503052	5.47406	6.89003	2.03e-11	1.78e-10	15.2721
ASXL3	-0.321421	1.8997	-6.88893	2.05e-11	1.79e-10	15.2653
LRPPRC	0.362894	7.2135	6.88341	2.12e-11	1.85e-10	15.2313
GIMAP1	-0.453315	2.71776	-6.88298	2.12e-11	1.85e-10	15.2286
GPATCH4	0.355041	5.68678	6.88296	2.12e-11	1.85e-10	15.2285
VENTX	-0.432061	2.42269	-6.88278	2.13e-11	1.85e-10	15.2274
ANGPTL2	-0.822823	5.68843	-6.88212	2.14e-11	1.86e-10	15.2233
DNAJC5	0.366031	6.42725	6.8814	2.15e-11	1.87e-10	15.2189
STAB1	-0.762333	5.60776	-6.87953	2.17e-11	1.89e-10	15.2074
KLHL6	-0.528838	2.95573	-6.8762	2.22e-11	1.93e-10	15.1869
ZNF441	-0.346348	3.54036	-6.87559	2.23e-11	1.93e-10	15.1831
PPP1R13L	0.649329	6.39358	6.87318	2.26e-11	1.96e-10	15.1683
CCT6B	-0.351448	3.1469	-6.87303	2.26e-11	1.96e-10	15.1674
IRF6	0.962587	7.45618	6.87277	2.27e-11	1.97e-10	15.1658
SLC2A8	-0.474005	5.22287	-6.86971	2.31e-11	2e-10	15.147
GLT8D2	-0.747326	4.28461	-6.86658	2.36e-11	2.04e-10	15.1277
KIF19	-0.271821	1.94503	-6.86339	2.4e-11	2.08e-10	15.1081
CMAS	0.400006	7.23348	6.86286	2.41e-11	2.09e-10	15.1048
MMP2	-0.932836	8.11332	-6.85562	2.52e-11	2.18e-10	15.0603
PIK3R3	-0.529162	4.67813	-6.85312	2.56e-11	2.22e-10	15.045
EMG1	0.336184	5.93269	6.85312	2.56e-11	2.22e-10	15.045
DHCR24	0.801599	7.81971	6.85266	2.57e-11	2.22e-10	15.0422
MYH3	-0.666536	3.40488	-6.85085	2.6e-11	2.25e-10	15.0311
CACNA1D	-0.738066	2.94065	-6.84945	2.62e-11	2.26e-10	15.0225
FAM229B	-0.505192	3.52871	-6.84696	2.67e-11	2.3e-10	15.0072
PDE6B	-0.515988	2.71088	-6.84429	2.71e-11	2.34e-10	14.9908
DBF4	0.353546	4.32499	6.84063	2.77e-11	2.39e-10	14.9684
BAMBI	-1.22747	6.34558	-6.83946	2.79e-11	2.41e-10	14.9612
DNAJB11	0.360086	7.52383	6.83685	2.84e-11	2.45e-10	14.9452
DNA2	0.427869	4.07593	6.83385	2.89e-11	2.49e-10	14.9268
ARHGAP31	-0.50588	4.40791	-6.83353	2.9e-11	2.49e-10	14.9249
UBA6	0.461921	6.09293	6.83092	2.95e-11	2.53e-10	14.9089
PUF60	0.374576	7.78852	6.82897	2.98e-11	2.56e-10	14.8969
AMPD1	-0.327058	1.96561	-6.82715	3.02e-11	2.59e-10	14.8858
SIDT2	-0.405613	5.84449	-6.82677	3.03e-11	2.6e-10	14.8835
PPID	0.354447	6.16741	6.82601	3.04e-11	2.61e-10	14.8788
SSTR2	-0.440735	4.15654	-6.82529	3.05e-11	2.62e-10	14.8744
DENND2A	-0.676403	4.16585	-6.82235	3.11e-11	2.67e-10	14.8564
LIPE	-0.563341	3.36284	-6.82224	3.11e-11	2.67e-10	14.8558
EYA1	-0.672084	2.57726	-6.82144	3.13e-11	2.68e-10	14.8509
PRPF19	0.354789	8.33622	6.81972	3.16e-11	2.71e-10	14.8404
IKZF4	-0.294027	3.42011	-6.81851	3.19e-11	2.72e-10	14.8329
LAMC2	1.29453	6.81118	6.81791	3.2e-11	2.73e-10	14.8293
MAP3K8	-0.54829	5.44744	-6.81666	3.22e-11	2.75e-10	14.8216
SAT2	-0.381503	6.23581	-6.81665	3.22e-11	2.75e-10	14.8216
CTSK	-0.958023	7.74174	-6.8155	3.25e-11	2.77e-10	14.8145
NLGN1	-0.417655	2.08143	-6.8131	3.3e-11	2.81e-10	14.7999
EPOR	-0.537452	3.92755	-6.8117	3.33e-11	2.83e-10	14.7913
AATF	0.313691	7.3036	6.81068	3.35e-11	2.85e-10	14.7851
DCAF13	0.454564	6.13106	6.81013	3.36e-11	2.86e-10	14.7817
BICC1	-0.665431	3.61526	-6.80878	3.39e-11	2.88e-10	14.7735
SEH1L	0.374932	5.25097	6.80829	3.4e-11	2.89e-10	14.7705
DHX9	0.311271	7.33981	6.80702	3.42e-11	2.91e-10	14.7627
PARP15	-0.485839	2.85619	-6.80257	3.52e-11	2.99e-10	14.7355
RPS6KA4	0.425876	6.22622	6.80247	3.52e-11	2.99e-10	14.735
GPRIN1	0.62689	3.73572	6.80113	3.55e-11	3.02e-10	14.7268
VIP	-0.375793	1.88298	-6.80046	3.57e-11	3.03e-10	14.7227
IKZF1	-0.544724	2.82061	-6.79987	3.58e-11	3.04e-10	14.7191
AOAH	-0.759928	4.19051	-6.7997	3.59e-11	3.04e-10	14.7181
TNFSF15	-0.546511	2.88932	-6.79907	3.6e-11	3.05e-10	14.7142
CD5	-0.668929	3.28	-6.7989	3.6e-11	3.05e-10	14.7132
TRA2B	0.31268	6.72674	6.79881	3.61e-11	3.05e-10	14.7126
ASAH1	-0.4713	7.0097	-6.7984	3.61e-11	3.06e-10	14.7101
SFRP2	-1.65433	6.6029	-6.79772	3.63e-11	3.07e-10	14.706
IMP4	0.320119	7.01868	6.79721	3.64e-11	3.08e-10	14.7028
IL10	-0.494159	2.84462	-6.79532	3.68e-11	3.11e-10	14.6913
GYPE	-0.212245	1.79129	-6.79305	3.74e-11	3.15e-10	14.6775
GDF7	-0.50934	2.30958	-6.79208	3.76e-11	3.17e-10	14.6716
ARHGEF10L	-0.507528	5.10815	-6.7912	3.78e-11	3.19e-10	14.6662
ERLIN1	0.350122	6.02067	6.78881	3.84e-11	3.23e-10	14.6516
TRAF3IP2	0.408546	4.90711	6.78873	3.84e-11	3.23e-10	14.6512
LRRC75A	-0.377835	2.43553	-6.78868	3.84e-11	3.23e-10	14.6509
STK32B	-0.372606	2.39214	-6.78855	3.84e-11	3.23e-10	14.6501
KLK10	1.24486	3.22446	6.78751	3.87e-11	3.25e-10	14.6437
TUB	-0.551997	2.89849	-6.78484	3.93e-11	3.31e-10	14.6275
MRPL21	0.414337	6.5738	6.78328	3.97e-11	3.34e-10	14.6179
TCEAL1	-0.503787	5.59542	-6.78263	3.99e-11	3.35e-10	14.614
PFKFB4	0.635303	4.91669	6.78157	4.02e-11	3.37e-10	14.6075
RASAL3	-0.667371	3.97332	-6.78145	4.02e-11	3.37e-10	14.6068
TMA16	0.323567	5.17625	6.78144	4.02e-11	3.37e-10	14.6068
SLC35F4	-0.168639	1.75637	-6.78037	4.05e-11	3.39e-10	14.6003
CPSF3	0.310236	6.98135	6.77805	4.1e-11	3.44e-10	14.5861
SCD	0.894946	8.18494	6.77595	4.16e-11	3.48e-10	14.5734
ADAM17	0.454459	5.74452	6.77586	4.16e-11	3.48e-10	14.5728
BBS4	-0.356692	5.09883	-6.77569	4.17e-11	3.48e-10	14.5717
CD93	-0.65334	5.50609	-6.77438	4.2e-11	3.51e-10	14.5638
WDR86	-0.481638	2.79537	-6.77374	4.22e-11	3.52e-10	14.5599
HGF	-0.712559	3.03779	-6.7732	4.23e-11	3.53e-10	14.5566
MKX	-0.517096	2.17367	-6.77274	4.24e-11	3.54e-10	14.5538
RPL17	0.42492	6.5674	6.77214	4.26e-11	3.55e-10	14.5501
RCBTB2	-0.39184	4.16487	-6.77157	4.27e-11	3.56e-10	14.5467
IQSEC3	-0.379	2.1356	-6.77094	4.29e-11	3.58e-10	14.5429
TMEM176A	-0.800626	5.66615	-6.76903	4.34e-11	3.62e-10	14.5313
ADPRH	-0.424604	3.51879	-6.76842	4.36e-11	3.63e-10	14.5275
MCM6	0.462292	6.24317	6.76811	4.37e-11	3.63e-10	14.5257
BRMS1	0.372046	6.65499	6.76575	4.43e-11	3.69e-10	14.5113
EXOSC3	0.423818	5.81975	6.76538	4.44e-11	3.69e-10	14.5091
LEFTY2	-0.457039	2.02369	-6.76359	4.49e-11	3.73e-10	14.4982
ADH1C	-1.20839	3.43894	-6.76197	4.54e-11	3.77e-10	14.4883
MSX1	-0.657081	3.66825	-6.76132	4.56e-11	3.78e-10	14.4844
IQSEC1	-0.392377	5.45234	-6.75967	4.6e-11	3.82e-10	14.4744
WDR36	0.346999	5.80059	6.7592	4.62e-11	3.83e-10	14.4715
RNF103	-0.340059	5.25275	-6.75891	4.63e-11	3.83e-10	14.4698
GALNT16	-0.449948	2.13374	-6.75382	4.77e-11	3.95e-10	14.4389
NAE1	0.332276	6.6077	6.75282	4.8e-11	3.98e-10	14.4328
RERE	-0.42885	6.596	-6.75036	4.88e-11	4.04e-10	14.4179
DOCK10	-0.593882	3.79925	-6.75021	4.88e-11	4.04e-10	14.417
PTCHD1	-0.954451	3.02521	-6.7492	4.91e-11	4.06e-10	14.4109
CYP4F12	-1.0738	4.18669	-6.74868	4.93e-11	4.07e-10	14.4077
KRT78	0.611886	2.24708	6.745	5.04e-11	4.16e-10	14.3854
PPP4R1	0.466197	7.05526	6.74453	5.06e-11	4.17e-10	14.3826
TACO1	0.325995	6.61561	6.74356	5.09e-11	4.2e-10	14.3767
YBX1	0.375091	9.70884	6.74129	5.16e-11	4.26e-10	14.3629
CASP9	-0.336149	4.37368	-6.74101	5.17e-11	4.26e-10	14.3612
RAB20	-0.586905	5.95063	-6.73978	5.21e-11	4.29e-10	14.3538
CBLN1	-0.298647	1.78788	-6.73949	5.22e-11	4.3e-10	14.352
CD48	-0.812223	4.2024	-6.73537	5.35e-11	4.41e-10	14.3271
NUDT16	-0.318616	4.35592	-6.73382	5.41e-11	4.45e-10	14.3177
KCTD1	0.561821	4.08724	6.73184	5.47e-11	4.5e-10	14.3056
DOCK2	-0.688489	4.32622	-6.72943	5.56e-11	4.56e-10	14.2911
FOXP2	-0.487151	2.5283	-6.72917	5.56e-11	4.57e-10	14.2895
APLNR	-0.68994	4.04013	-6.72825	5.6e-11	4.59e-10	14.284
[truncated: 14,409 more rows]
