# Supplementary material for: A Novel m7G-Related Genes-Based Signature with Prognostic Value and Predictive Ability to Select Patients Responsive to Personalized Treatment Strategies in Bladder Cancer
Source: Cancers (Basel). 2022 Oct 29;14(21):5346. doi: 10.3390/cancers14215346 (PMC9656096; doi:10.3390/cancers14215346)
Supplement: Supplementary file 1 [file cancers-14-05346-s001.zip › Table S4.xlsx]

## Sheet: 337 VS 205差异表达基因
genesymbol	logFC	AveExpr	t	P.Value	adj.P.Val	B
NR4A1	-2.1969	4.84343	-22.1914	4.15832e-78	6.82298e-74	167.05
DUSP1	-2.42957	7.93146	-21.597	4.21035e-75	3.45417e-71	160.194
NR4A3	-1.84453	3.20518	-20.7844	5.28935e-71	2.89292e-67	150.841
EGR2	-1.93284	4.10829	-20.206	4.26902e-68	1.75115e-64	144.208
GEM	-2.16093	4.391	-20.0413	2.86067e-67	9.38757e-64	142.323
EGR1	-2.27675	7.75039	-19.9768	6.02412e-67	1.6474e-63	141.584
RGS2	-2.28054	6.26952	-19.9354	9.70813e-67	2.08398e-63	141.111
JUN	-1.59523	7.04729	-19.9314	1.01608e-66	2.08398e-63	141.066
EGR3	-1.40111	2.94561	-19.7508	8.14029e-66	1.48406e-62	139.004
IL6	-2.36484	3.40513	-19.3029	1.40028e-63	2.29758e-60	133.902
GPR183	-1.98918	4.53854	-19.2696	2.05251e-63	3.0616e-60	133.523
RGS1	-2.462	5.54382	-19.2278	3.31555e-63	4.53347e-60	133.048
PDE4B	-1.27138	2.88356	-19.0146	3.80566e-62	4.80333e-59	130.629
SOCS3	-1.7194	6.00316	-18.3	1.30718e-58	1.53202e-55	122.559
KLF9	-1.585	4.55421	-17.614	3.0283e-55	3.31255e-52	114.88
ZFP36	-1.55179	8.54563	-17.5436	6.67426e-55	6.84446e-52	114.096
ITPRIP	-1.08422	4.39248	-17.477	1.40931e-54	1.36023e-51	113.355
GLIPR1	-1.30197	4.2422	-17.332	7.15327e-54	6.5206e-51	111.745
GADD45B	-1.53918	5.97637	-17.2007	3.10166e-53	2.67853e-50	110.291
SLC2A3	-1.85467	5.65623	-17.1949	3.31118e-53	2.71649e-50	110.227
KLF2	-1.44712	5.61516	-17.1641	4.66881e-53	3.6479e-50	109.886
CXCL2	-1.93238	3.45008	-17.1061	8.91366e-53	6.64797e-50	109.245
ADAMTS4	-1.68081	3.7332	-17.0665	1.38615e-52	9.88866e-50	108.808
PER1	-1.30568	4.63852	-16.9245	6.72389e-52	4.5969e-49	107.242
THBS1	-1.87384	7.4375	-16.8067	2.48608e-51	1.63167e-48	105.946
FOSB	-2.45517	5.50794	-16.7741	3.56956e-51	2.25267e-48	105.588
RASD1	-1.74057	3.90114	-16.6793	1.01913e-50	6.19327e-48	104.548
HBEGF	-1.44434	4.98219	-16.5904	2.72425e-50	1.59641e-47	103.574
ATF3	-2.03444	5.69421	-16.508	6.76174e-50	3.82575e-47	102.673
FILIP1L	-1.6329	4.58449	-16.4554	1.20755e-49	6.60452e-47	102.098
DNAJB5	-1.21235	3.53853	-16.2818	8.13963e-49	4.30823e-46	100.207
CH25H	-1.45417	3.62485	-16.2051	1.88727e-48	9.44312e-46	99.3736
MYADM	-1.56413	5.20129	-16.2045	1.89921e-48	9.44312e-46	99.3674
ZEB2	-1.21715	3.97914	-16.0215	1.40649e-47	6.78755e-45	97.3831
TNFAIP3	-1.58872	5.72646	-15.8626	7.93673e-47	3.72074e-44	95.6684
MEDAG	-1.73683	3.5995	-15.846	9.50828e-47	4.33366e-44	95.4894
NR4A2	-1.55008	5.01359	-15.8114	1.38479e-46	6.141e-44	95.1168
CRISPLD2	-1.62157	5.63566	-15.7351	3.17162e-46	1.36947e-43	94.2956
NLRP3	-1.01511	2.99417	-15.7195	3.75357e-46	1.5792e-43	94.1287
SAMSN1	-1.42608	4.08817	-15.7088	4.2161e-46	1.72944e-43	94.0135
C5AR1	-1.41481	3.82327	-15.6851	5.45258e-46	2.18209e-43	93.7587
PDLIM3	-1.99924	4.37086	-15.4568	6.41818e-45	2.50737e-42	91.3156
SRGN	-1.82407	7.09053	-15.4533	6.66483e-45	2.54318e-42	91.2782
RBMS3	-0.892641	2.72099	-15.3031	3.35218e-44	1.25006e-41	89.6777
FGF7	-1.70274	3.4159	-15.199	1.02286e-43	3.72959e-41	88.5724
CCDC80	-1.93674	4.63217	-15.1752	1.31936e-43	4.67127e-41	88.3202
FERMT2	-1.43582	5.27629	-15.1739	1.33806e-43	4.67127e-41	88.3062
ARID5A	-0.951196	4.61095	-15.1697	1.39895e-43	4.78208e-41	88.2621
NEXN	-1.55918	4.40877	-15.0947	3.11991e-43	1.04472e-40	87.4675
BNC2	-1.19579	2.78822	-15.0615	4.44553e-43	1.45885e-40	87.1166
ITGA5	-1.6281	6.27175	-14.9608	1.2989e-42	4.1789e-40	86.0544
SLIT2	-1.41268	3.42106	-14.9548	1.38426e-42	4.36787e-40	85.9913
TGFB3	-1.62814	4.65191	-14.8959	2.58902e-42	8.01522e-40	85.371
CXCR4	-1.46722	6.25747	-14.8707	3.38275e-42	1.02786e-39	85.1061
BOC	-1.39522	3.25998	-14.8545	4.01819e-42	1.19873e-39	84.9356
MEF2C	-0.96014	3.77053	-14.7431	1.3062e-41	3.82717e-39	83.7677
WIPF1	-1.33177	4.90593	-14.7397	1.35399e-41	3.8976e-39	83.7321
GFPT2	-1.77038	3.56734	-14.7236	1.60628e-41	4.5441e-39	83.5629
SRPX	-1.72762	4.4434	-14.7124	1.80817e-41	5.02856e-39	83.4456
FHL1	-2.00871	4.6583	-14.7082	1.88846e-41	5.16432e-39	83.4025
JAZF1	-1.08135	3.75205	-14.7043	1.96911e-41	5.29657e-39	83.3611
SLC25A25	-0.961035	4.27304	-14.63	4.31219e-41	1.1412e-38	82.5846
RECK	-0.964985	3.40304	-14.6132	5.14797e-41	1.34076e-38	82.4091
FLNC	-2.26475	4.69158	-14.5915	6.46385e-41	1.65717e-38	82.1836
TNC	-1.97797	5.21353	-14.5803	7.27658e-41	1.83683e-38	82.0663
NFIL3	-1.09119	5.43703	-14.5601	8.99421e-41	2.23602e-38	81.8564
MSRB3	-1.61606	4.16436	-14.5511	9.89106e-41	2.42228e-38	81.7622
KCNE4	-1.16783	3.19427	-14.5298	1.23719e-40	2.98526e-38	81.5405
ADAMTS6	-0.741669	2.58658	-14.5037	1.62715e-40	3.86932e-38	81.2691
RAMP1	-1.87111	4.36245	-14.502	1.65617e-40	3.88206e-38	81.2516
AP1S2	-0.932116	4.04003	-14.4917	1.84541e-40	4.26471e-38	81.1445
STARD8	-0.895204	3.26631	-14.4859	1.96249e-40	4.47231e-38	81.0835
FOS	-1.78604	8.65435	-14.4585	2.61408e-40	5.87559e-38	80.7995
CYBRD1	-1.58668	5.35127	-14.3935	5.16446e-40	1.13361e-37	80.1251
EBF1	-0.990319	3.06474	-14.3921	5.24083e-40	1.13361e-37	80.1106
MT2A	-1.91043	8.22667	-14.3919	5.25075e-40	1.13361e-37	80.1087
ADAMTS1	-1.5496	5.83184	-14.3852	5.63476e-40	1.20072e-37	80.0388
OSMR	-1.38603	4.84277	-14.3616	7.20707e-40	1.51073e-37	79.795
CALD1	-1.75782	6.95476	-14.3608	7.27373e-40	1.51073e-37	79.7859
PALLD	-1.59894	6.01086	-14.3397	9.06504e-40	1.85924e-37	79.5678
CXCL12	-1.71983	4.13244	-14.3083	1.2584e-39	2.54911e-37	79.243
NRP2	-1.24102	4.08612	-14.3059	1.2905e-39	2.58225e-37	79.218
PRKCB	-1.20415	3.30146	-14.2896	1.52839e-39	3.02143e-37	79.0504
LIF	-1.37312	3.91503	-14.2813	1.66775e-39	3.25768e-37	78.964
RSPO3	-1.36783	2.74897	-14.2607	2.06611e-39	3.98833e-37	78.7519
FGL2	-1.53862	4.4525	-14.2589	2.10583e-39	4.01772e-37	78.733
PKDCC	-1.62556	3.26949	-14.2382	2.61324e-39	4.92852e-37	78.5192
WWTR1	-0.892147	4.61591	-14.2342	2.72492e-39	5.05826e-37	78.4777
TCF4	-0.970085	3.66726	-14.2335	2.74369e-39	5.05826e-37	78.4709
SNAI1	-1.09107	3.55036	-14.2294	2.86464e-39	5.22256e-37	78.4282
LMCD1	-1.40771	4.54749	-14.2233	3.05185e-39	5.50271e-37	78.3655
ATP8B2	-1.18869	4.12245	-14.2208	3.13192e-39	5.57025e-37	78.3398
ROR2	-1.53691	3.60761	-14.22	3.1572e-39	5.57025e-37	78.3319
CSRNP1	-1.06199	6.06475	-14.2072	3.60907e-39	6.29974e-37	78.1994
FLNA	-1.55902	8.28246	-14.2046	3.70496e-39	6.39905e-37	78.1734
VIM	-1.51549	8.77781	-14.1955	4.07481e-39	6.96453e-37	78.0792
LRRK2	-0.845325	3.01938	-14.1638	5.66241e-39	9.50156e-37	77.7533
HSPB6	-2.18095	4.14468	-14.1636	5.67499e-39	9.50156e-37	77.7511
MAMLD1	-0.7315	2.54608	-14.1596	5.91658e-39	9.80598e-37	77.7098
OLFML3	-1.68003	4.83575	-14.1561	6.13897e-39	1.00728e-36	77.6733
GAS1	-1.88322	3.6209	-14.1539	6.27852e-39	1.01998e-36	77.651
GNB4	-1.07965	3.74355	-14.146	6.81364e-39	1.09606e-36	77.57
TAGLN	-2.04763	8.2176	-14.1348	7.65831e-39	1.21998e-36	77.4543
CNN1	-2.57941	5.23077	-14.1177	9.13886e-39	1.44183e-36	77.2792
ARHGAP24	-0.898263	3.34115	-14.1076	1.01508e-38	1.58622e-36	77.1752
RRAD	-1.47862	3.70553	-14.0722	1.46566e-38	2.26873e-36	76.8114
AXL	-1.35566	5.35366	-14.0589	1.68045e-38	2.5769e-36	76.676
KCNJ8	-1.25949	3.78944	-14.0391	2.06292e-38	3.1065e-36	76.4729
CD300LB	-0.561578	2.02963	-14.0391	2.06368e-38	3.1065e-36	76.4725
ZEB1	-1.11841	4.48838	-14.035	2.15353e-38	3.21229e-36	76.4303
CYTIP	-1.3614	3.97024	-14.0333	2.19155e-38	3.23955e-36	76.413
HEPH	-1.28416	3.77645	-14.0191	2.53727e-38	3.7171e-36	76.2679
ADAMTS9	-1.02316	3.53495	-14.0168	2.59927e-38	3.77423e-36	76.244
OSM	-1.02897	2.74853	-14.0146	2.66012e-38	3.82871e-36	76.2211
CPXM1	-1.82895	4.8999	-13.9962	3.2166e-38	4.58938e-36	76.033
GLIPR2	-1.38379	4.5905	-13.9858	3.58173e-38	5.0663e-36	75.9265
COL14A1	-1.47585	4.84294	-13.9832	3.67828e-38	5.1584e-36	75.9001
AOX1	-1.36588	2.92616	-13.9726	4.10435e-38	5.70713e-36	75.7916
TNS1	-1.48714	4.96949	-13.9614	4.60781e-38	6.31911e-36	75.677
CELF2	-0.925517	2.76969	-13.9611	4.62148e-38	6.31911e-36	75.6741
DACT1	-1.25916	3.26731	-13.9485	5.26114e-38	7.13428e-36	75.5457
LAMA4	-1.25128	5.50122	-13.9446	5.48079e-38	7.37122e-36	75.5052
CPXM2	-1.67491	3.88381	-13.9402	5.73198e-38	7.64637e-36	75.4608
GYPC	-1.39577	4.47615	-13.9348	6.05874e-38	8.01708e-36	75.4059
FBXL7	-0.938059	3.05156	-13.9338	6.12139e-38	8.03519e-36	75.3957
DIXDC1	-1.10446	3.54513	-13.9302	6.35833e-38	8.27996e-36	75.3581
THEMIS2	-1.1817	3.84677	-13.9148	7.44612e-38	9.62015e-36	75.2017
MYL9	-1.84836	7.87853	-13.9099	7.83117e-38	1.00386e-35	75.1518
TUBB6	-1.5188	5.6956	-13.9088	7.92328e-38	1.00779e-35	75.1402
SFRP1	-1.80861	3.33152	-13.8944	9.1928e-38	1.16027e-35	74.993
MSN	-1.34141	7.34302	-13.8648	1.24691e-37	1.56178e-35	74.6912
DDR2	-1.34762	4.32856	-13.8542	1.38951e-37	1.72721e-35	74.5839
MAP1A	-1.22203	3.74935	-13.8454	1.5212e-37	1.86975e-35	74.4943
BAG2	-1.06678	3.57046	-13.8444	1.53811e-37	1.86975e-35	74.4833
SYNC	-1.01388	2.82688	-13.8443	1.53837e-37	1.86975e-35	74.4832
GAS7	-1.18705	3.323	-13.81	2.18972e-37	2.64183e-35	74.1336
EFEMP1	-2.03743	5.02239	-13.8016	2.38731e-37	2.8592e-35	74.048
S1PR1	-1.04269	4.16564	-13.7989	2.4529e-37	2.91646e-35	74.0212
C1R	-1.47658	6.72122	-13.7947	2.56069e-37	3.02272e-35	73.9786
JAM3	-1.28092	4.89051	-13.7908	2.66732e-37	3.1261e-35	73.9382
P2RX1	-1.54013	2.95637	-13.7733	3.1902e-37	3.7124e-35	73.7609
ABI3BP	-1.41749	4.05986	-13.7642	3.50309e-37	4.04779e-35	73.6683
LIMS2	-1.21879	3.83488	-13.7608	3.62731e-37	4.16202e-35	73.6338
SGK1	-1.40661	5.73995	-13.7558	3.81595e-37	4.34806e-35	73.5836
FBN1	-1.42574	5.08624	-13.7536	3.90466e-37	4.41846e-35	73.5608
LMOD1	-2.00244	5.08652	-13.7489	4.09518e-37	4.6023e-35	73.5136
TNFAIP6	-1.57196	3.85426	-13.7468	4.18581e-37	4.67216e-35	73.492
BIN1	-1.46514	4.75146	-13.7374	4.61067e-37	5.11162e-35	73.3962
ADAM33	-1.10006	2.8351	-13.7364	4.65725e-37	5.1286e-35	73.3863
MT1M	-1.61145	3.39908	-13.7229	5.3473e-37	5.84923e-35	73.2495
FXYD6	-1.52304	3.32347	-13.7153	5.78014e-37	6.28083e-35	73.1724
LYVE1	-1.28829	3.20334	-13.7125	5.94649e-37	6.41908e-35	73.1443
ENTPD1	-0.868015	4.63489	-13.7118	5.99352e-37	6.42756e-35	73.1365
CRYAB	-1.74367	4.91066	-13.7054	6.39646e-37	6.81514e-35	73.0721
IL10RA	-1.33308	4.34053	-13.6967	6.99189e-37	7.40148e-35	72.9839
PARVB	-1.03821	4.21931	-13.6907	7.43102e-37	7.81591e-35	72.9236
COL6A2	-1.81792	7.99692	-13.6816	8.16103e-37	8.52906e-35	72.8308
IFITM2	-1.26902	8.03639	-13.6776	8.50081e-37	8.82793e-35	72.7904
MAP1B	-1.39264	4.43625	-13.6744	8.78084e-37	9.06138e-35	72.7583
IL10	-0.835955	2.57952	-13.654	1.08129e-36	1.10886e-34	72.5522
PRRX1	-1.62722	3.70887	-13.652	1.10386e-36	1.12498e-34	72.5318
PLN	-1.93907	3.82785	-13.6495	1.13213e-36	1.14666e-34	72.5067
EMP3	-1.46417	6.18377	-13.6451	1.18463e-36	1.19247e-34	72.4618
PLCL1	-0.631932	2.46684	-13.6371	1.28526e-36	1.28588e-34	72.3811
SERPINE2	-1.63602	4.36489	-13.6331	1.33919e-36	1.33172e-34	72.3404
SYNM	-2.04808	4.89986	-13.6246	1.45998e-36	1.4431e-34	72.2549
ANKRD29	-0.890894	2.35699	-13.6188	1.54962e-36	1.52253e-34	72.1959
LATS2	-0.867033	4.36524	-13.6145	1.61945e-36	1.58167e-34	72.1523
GLI2	-0.858563	2.51967	-13.6106	1.68524e-36	1.63618e-34	72.1128
CNRIP1	-1.07264	3.56939	-13.6073	1.74236e-36	1.68169e-34	72.0798
ZCCHC24	-1.12525	4.02679	-13.6043	1.79662e-36	1.72391e-34	72.0495
MEOX2	-1.08683	2.42982	-13.5983	1.90982e-36	1.82188e-34	71.989
SLA	-1.2741	3.64192	-13.5961	1.95324e-36	1.85253e-34	71.9667
CAV1	-1.48174	6.07856	-13.5895	2.08978e-36	1.97064e-34	71.8998
JAM2	-0.959287	3.22002	-13.5611	2.78818e-36	2.6142e-34	71.6143
C1orf162	-1.24589	4.62534	-13.5599	2.82281e-36	2.63162e-34	71.6021
TSC22D3	-1.13274	6.01678	-13.5397	3.46777e-36	3.21464e-34	71.3984
PLSCR4	-1.15874	4.01036	-13.5272	3.93988e-36	3.63177e-34	71.272
KLF6	-0.955787	7.75538	-13.526	3.98811e-36	3.65569e-34	71.2599
KCNMA1	-0.974873	2.78797	-13.5105	4.66735e-36	4.25455e-34	71.1042
SPARCL1	-1.53646	6.80747	-13.496	5.40633e-36	4.90094e-34	70.9587
HDC	-1.13733	3.04988	-13.4862	5.97299e-36	5.38488e-34	70.86
FPR1	-1.41618	3.83587	-13.4754	6.66439e-36	5.97537e-34	70.7516
SYNPO2	-1.70103	4.28402	-13.4684	7.15438e-36	6.37984e-34	70.6813
IER3	-1.34194	6.88585	-13.4646	7.43533e-36	6.59454e-34	70.6432
NAV3	-0.716281	2.28517	-13.4615	7.6728e-36	6.76857e-34	70.612
EMILIN1	-1.7144	5.47914	-13.4564	8.08129e-36	7.09079e-34	70.5607
RAB3IL1	-1.154	3.69527	-13.4486	8.75217e-36	7.612e-34	70.4817
DPYSL3	-1.85725	6.01469	-13.4484	8.76809e-36	7.612e-34	70.4799
ARHGAP20	-0.63832	2.18078	-13.4344	1.00972e-35	8.71976e-34	70.3402
MAOB	-1.49481	3.54262	-13.4285	1.07241e-35	9.21266e-34	70.2806
FYN	-1.00246	4.6649	-13.4225	1.13925e-35	9.73587e-34	70.2207
MYLK	-1.31875	4.77405	-13.4099	1.29424e-35	1.09756e-33	70.0944
EVI2A	-1.10297	3.35184	-13.4097	1.2977e-35	1.09756e-33	70.0918
CD248	-1.47102	5.91004	-13.408	1.32013e-35	1.11081e-33	70.0748
FGF2	-0.904483	2.60711	-13.3835	1.69119e-35	1.41576e-33	69.8296
NNMT	-1.99661	6.018	-13.3819	1.71878e-35	1.43156e-33	69.8136
LGI2	-0.923094	2.67062	-13.3726	1.88885e-35	1.56527e-33	69.7201
KCNMB1	-1.44678	3.43944	-13.3557	2.24029e-35	1.84717e-33	69.5512
DNAJB4	-0.869986	4.53168	-13.3526	2.311e-35	1.89594e-33	69.5204
F3	-1.48736	5.08422	-13.3491	2.39458e-35	1.95474e-33	69.4853
TGFB1I1	-1.22825	5.16834	-13.3405	2.61075e-35	2.12065e-33	69.3997
CREB5	-0.746592	2.44293	-13.3318	2.85137e-35	2.30469e-33	69.3124
FKBP5	-1.32421	4.51844	-13.3174	3.29786e-35	2.65252e-33	69.1684
DCHS1	-1.04648	3.95158	-13.2945	4.15432e-35	3.32507e-33	68.9399
DOCK2	-1.19608	3.93736	-13.2879	4.44045e-35	3.53684e-33	68.8739
MRGPRF	-1.55383	4.07856	-13.2766	4.97522e-35	3.94365e-33	68.7613
NFATC1	-0.884316	3.11967	-13.2659	5.54301e-35	4.37258e-33	68.6544
PDGFRB	-1.37898	6.01928	-13.262	5.76633e-35	4.52698e-33	68.6153
RUSC2	-0.930061	4.30108	-13.2558	6.1381e-35	4.7959e-33	68.5534
RASL12	-1.21633	3.70406	-13.2388	7.28304e-35	5.66351e-33	68.3841
PTGIS	-2.08436	4.46324	-13.2374	7.38257e-35	5.71383e-33	68.3707
COLEC12	-1.47076	3.67243	-13.236	7.48729e-35	5.76767e-33	68.3567
ELMO1	-0.892162	3.58989	-13.225	8.36434e-35	6.41318e-33	68.2471
GATA6	-1.17904	3.56972	-13.1826	1.28037e-34	9.77058e-33	67.8256
EMP1	-1.36252	6.32981	-13.1822	1.28623e-34	9.77058e-33	67.8211
COL6A1	-1.72648	7.9878	-13.1552	1.68603e-34	1.27486e-32	67.5531
PRDM1	-0.993004	4.46632	-13.1462	1.84487e-34	1.38856e-32	67.464
CPED1	-1.14986	3.69007	-13.1318	2.13066e-34	1.59634e-32	67.3215
CD86	-1.11571	3.76201	-13.1177	2.45441e-34	1.83054e-32	67.1814
CEP112	-0.756448	3.28015	-13.1063	2.75161e-34	2.04292e-32	67.0683
STAB1	-1.21408	5.24576	-13.1041	2.81299e-34	2.07908e-32	67.0465
P2RY14	-0.738481	2.40983	-13.1028	2.84875e-34	2.09607e-32	67.0339
CD69	-1.34212	3.57599	-13.1013	2.89402e-34	2.11987e-32	67.0183
CCL2	-1.67214	5.66819	-13.0976	3.00331e-34	2.19015e-32	66.9816
C1S	-1.83326	7.41383	-13.0936	3.12577e-34	2.26936e-32	66.9421
TWIST1	-1.39726	3.36363	-13.0926	3.1576e-34	2.28238e-32	66.9321
RHOJ	-0.913609	3.66512	-13.0909	3.20966e-34	2.30983e-32	66.9159
TPM2	-1.61243	7.42523	-13.0728	3.8489e-34	2.75776e-32	66.7361
DACT3	-1.19183	3.0173	-13.053	4.69006e-34	3.34585e-32	66.5404
CLMP	-1.3326	3.85763	-13.0472	4.96859e-34	3.52921e-32	66.4833
SSC5D	-1.51628	3.96331	-13.0404	5.31742e-34	3.7607e-32	66.4162
PDLIM7	-1.0478	5.4492	-13.0356	5.57796e-34	3.92803e-32	66.3688
PDZRN3	-1.27112	3.50688	-13.0314	5.81687e-34	4.07877e-32	66.3273
FAM124A	-0.620107	2.31002	-13.0254	6.17501e-34	4.31147e-32	66.2682
TSPAN4	-1.02409	4.76076	-13.019	6.58382e-34	4.57743e-32	66.2047
ACTA2	-1.79595	9.04377	-13.0148	6.86285e-34	4.75129e-32	66.1636
CLIP3	-1.34621	4.70165	-13.0103	7.17956e-34	4.94967e-32	66.119
ZYX	-0.827916	7.8968	-13.0084	7.32019e-34	5.02551e-32	66.0998
SPEG	-1.24751	2.96078	-13.0078	7.35824e-34	5.03059e-32	66.0947
ERG	-0.685096	3.05893	-13.0035	7.68709e-34	5.2336e-32	66.0514
ROR1	-0.922994	2.73322	-12.9926	8.56859e-34	5.79742e-32	65.9439
EPB41L2	-0.907628	4.09592	-12.9924	8.58589e-34	5.79742e-32	65.9419
VSTM4	-0.770925	2.88054	-12.9909	8.70932e-34	5.85666e-32	65.9278
AOAH	-1.25157	3.80396	-12.9897	8.82153e-34	5.9079e-32	65.9151
KATNAL1	-0.878351	3.0131	-12.9765	1.00608e-33	6.7105e-32	65.785
PLEKHO2	-0.854102	5.522	-12.9681	1.09289e-33	7.25999e-32	65.7031
CLIC4	-1.29162	6.1022	-12.9675	1.0998e-33	7.27644e-32	65.6969
MT1A	-1.5343	3.73065	-12.9643	1.13581e-33	7.48451e-32	65.665
NFIX	-1.15948	4.95828	-12.9632	1.14776e-33	7.53298e-32	65.6546
OGN	-1.46568	2.8381	-12.9592	1.19466e-33	7.80957e-32	65.615
FMOD	-1.44848	4.88045	-12.9577	1.21297e-33	7.8978e-32	65.5999
CCDC71L	-0.87596	3.84697	-12.9532	1.26876e-33	8.19464e-32	65.5554
CD163	-1.63855	4.3339	-12.953	1.27061e-33	8.19464e-32	65.554
NEK6	-1.15174	4.61628	-12.9528	1.27355e-33	8.19464e-32	65.5517
FBLN5	-1.26748	4.9601	-12.9506	1.3012e-33	8.3399e-32	65.5304
TTYH2	-0.790418	2.83504	-12.9498	1.31185e-33	8.37539e-32	65.5224
COPZ2	-1.36349	4.86179	-12.9376	1.48062e-33	9.41629e-32	65.4026
SYT11	-1.10002	3.90429	-12.9346	1.52547e-33	9.66407e-32	65.373
SEMA3A	-0.994704	3.03302	-12.9318	1.56869e-33	9.89967e-32	65.3454
GPRIN3	-0.713167	2.72162	-12.927	1.646e-33	1.03477e-31	65.2978
EDNRA	-1.16103	3.9981	-12.9114	1.92146e-33	1.20334e-31	65.1446
RCSD1	-1.00541	3.45048	-12.9089	1.96944e-33	1.22869e-31	65.1202
NAP1L3	-0.935328	2.80962	-12.9054	2.04025e-33	1.26805e-31	65.0853
MN1	-0.872242	2.5345	-12.8992	2.16926e-33	1.34314e-31	65.0246
SLC16A2	-0.972504	3.79169	-12.8775	2.68974e-33	1.65915e-31	64.8117
LRIG1	-1.37737	3.87932	-12.8698	2.9033e-33	1.78417e-31	64.7361
GPBAR1	-0.689962	2.553	-12.8633	3.09659e-33	1.89586e-31	64.6723
SERPING1	-1.59285	7.96974	-12.8579	3.26618e-33	1.99225e-31	64.6196
ACTG2	-2.51193	7.18428	-12.857	3.29665e-33	2.00338e-31	64.6104
BEST1	-0.486592	2.38181	-12.8459	3.68156e-33	2.22904e-31	64.5011
IL7R	-1.41235	4.00116	-12.845	3.71421e-33	2.23855e-31	64.4923
APOLD1	-1.0017	3.81581	-12.8447	3.72455e-33	2.23855e-31	64.4896
PRR16	-0.843505	2.83956	-12.8393	3.92991e-33	2.34839e-31	64.4365
CHRDL2	-1.86624	3.37334	-12.8391	3.93593e-33	2.34839e-31	64.4349
FILIP1	-0.897687	2.61691	-12.8341	4.1349e-33	2.45324e-31	64.3861
ALDH1L2	-0.973192	2.8202	-12.834	4.14155e-33	2.45324e-31	64.3845
RNASE6	-1.38408	4.51803	-12.828	4.39444e-33	2.59367e-31	64.3259
ANGPTL1	-1.02364	2.39926	-12.8229	4.62171e-33	2.71803e-31	64.276
FAM20A	-1.13683	3.33665	-12.7981	5.90777e-33	3.46195e-31	64.033
XPNPEP2	-0.995113	2.51603	-12.7967	5.98951e-33	3.49736e-31	64.0194
CCL4	-1.31082	4.31518	-12.791	6.33683e-33	3.68704e-31	63.9636
DCN	-1.89601	6.8842	-12.7802	7.04684e-33	4.08568e-31	63.8585
CTLA4	-1.11884	3.19016	-12.778	7.2024e-33	4.16116e-31	63.8369
ATP8B4	-0.710397	2.66981	-12.777	7.2739e-33	4.18773e-31	63.8271
EPHA3	-0.975067	3.30714	-12.7732	7.55276e-33	4.33307e-31	63.7899
FOXF1	-1.29583	4.67648	-12.7638	8.29031e-33	4.73963e-31	63.6977
HIC1	-0.746438	2.80866	-12.761	8.52238e-33	4.85539e-31	63.6704
PRUNE2	-1.50725	2.89562	-12.7525	9.26752e-33	5.26165e-31	63.5874
STX2	-0.938089	3.42356	-12.7437	1.01106e-32	5.72052e-31	63.5013
SMOC2	-1.65134	4.92689	-12.7367	1.0832e-32	6.09552e-31	63.4331
COL16A1	-1.62102	5.35312	-12.7365	1.08477e-32	6.09552e-31	63.4316
INHBA	-1.40477	4.16353	-12.7129	1.36906e-32	7.66672e-31	63.2013
DOCK10	-0.983806	3.49361	-12.7028	1.5129e-32	8.44342e-31	63.1024
ECM2	-0.913484	3.13028	-12.6959	1.6183e-32	9.00102e-31	63.0358
DYRK3	-0.755624	3.51088	-12.6935	1.65688e-32	9.18446e-31	63.0125
SCN1B	-0.816181	2.97369	-12.693	1.66658e-32	9.20717e-31	63.0067
HEG1	-1.05461	5.13592	-12.6903	1.71059e-32	9.41856e-31	62.9809
SLC43A3	-0.999426	4.4237	-12.6774	1.94223e-32	1.06582e-30	62.8552
GLT8D2	-1.25587	3.88889	-12.6737	2.01482e-32	1.10197e-30	62.8189
KLHL5	-1.01971	4.83133	-12.6667	2.15881e-32	1.17667e-30	62.7506
BTK	-1.06465	3.72896	-12.6663	2.16573e-32	1.17667e-30	62.7474
PLAUR	-1.09928	4.90828	-12.6566	2.38339e-32	1.29065e-30	62.6527
ANK2	-1.00035	2.83943	-12.6523	2.48711e-32	1.34239e-30	62.6105
C3AR1	-1.23099	4.01733	-12.6424	2.74077e-32	1.47444e-30	62.5144
NCKAP1L	-1.25528	4.39118	-12.6281	3.15322e-32	1.69079e-30	62.3757
C1orf54	-0.759518	5.12904	-12.6237	3.29297e-32	1.75997e-30	62.3328
PDE2A	-0.827077	3.22515	-12.6177	3.49117e-32	1.85984e-30	62.275
RAB23	-1.049	4.0123	-12.6114	3.71357e-32	1.97192e-30	62.2138
IL16	-0.841568	2.93092	-12.6084	3.82602e-32	2.02507e-30	62.1843
CD200	-1.03329	3.88761	-12.6049	3.96025e-32	2.08938e-30	62.1502
MSC	-1.44901	4.06636	-12.5997	4.16577e-32	2.19077e-30	62.1001
NEGR1	-0.932899	2.52999	-12.5949	4.36569e-32	2.28857e-30	62.0538
HSPB2	-0.852976	2.76119	-12.5924	4.47412e-32	2.33794e-30	62.0295
LRRC2	-0.459338	1.91168	-12.5896	4.6011e-32	2.39666e-30	62.0018
SPON2	-1.29439	4.56387	-12.5828	4.91914e-32	2.55422e-30	61.9356
LCP2	-1.12281	4.53682	-12.5691	5.62427e-32	2.91114e-30	61.8031
MPP1	-1.12892	4.17626	-12.5647	5.87118e-32	3.02938e-30	61.7606
LRRC32	-1.14498	4.49732	-12.5579	6.27314e-32	3.22663e-30	61.6951
SH3RF3	-0.759971	3.05483	-12.5575	6.30091e-32	3.23079e-30	61.6907
RHOB	-0.990467	8.02007	-12.557	6.32725e-32	3.23419e-30	61.6866
TIMP2	-1.5446	6.76229	-12.5514	6.68689e-32	3.4074e-30	61.6319
RGCC	-0.988962	6.2012	-12.5406	7.43016e-32	3.77443e-30	61.5276
GAB3	-0.595119	2.43945	-12.5303	8.22165e-32	4.16361e-30	61.4274
COL6A3	-1.74447	7.41278	-12.5155	9.49875e-32	4.79555e-30	61.2845
CPEB1	-0.427789	1.85866	-12.5135	9.6842e-32	4.87418e-30	61.2654
LIX1L	-0.850605	4.73382	-12.5021	1.08315e-31	5.43494e-30	61.1546
LRCH2	-0.904597	3.04106	-12.4998	1.10753e-31	5.54034e-30	61.1326
PDLIM4	-1.21607	3.97749	-12.4778	1.37219e-31	6.84343e-30	60.9206
FLI1	-0.810959	3.89095	-12.4775	1.37688e-31	6.84603e-30	60.9172
STOM	-1.14486	7.14384	-12.4704	1.47512e-31	7.3123e-30	60.849
SFRP2	-2.9875	5.59794	-12.4602	1.62943e-31	8.0529e-30	60.7506
RGS18	-0.73346	2.73634	-12.4478	1.83921e-31	9.06241e-30	60.6308
ADAMTS2	-1.359	4.39589	-12.4469	1.85563e-31	9.11594e-30	60.622
CDH11	-1.45895	4.55796	-12.4444	1.8999e-31	9.30555e-30	60.5986
GAS6	-1.38597	5.82449	-12.4439	1.90914e-31	9.32297e-30	60.5938
ANGPTL2	-1.36342	5.26475	-12.4433	1.92041e-31	9.35018e-30	60.588
PTGS1	-1.76467	4.30501	-12.4392	1.99948e-31	9.70635e-30	60.5481
CLCF1	-1.06323	3.94452	-12.4345	2.09348e-31	1.01327e-29	60.5026
PTGFR	-0.79063	2.28841	-12.4338	2.10814e-31	1.01737e-29	60.4957
HTRA3	-1.60038	4.61063	-12.4332	2.11995e-31	1.02006e-29	60.4902
FAS	-0.990354	4.28447	-12.4312	2.1617e-31	1.03711e-29	60.4709
G0S2	-1.41486	4.47165	-12.4302	2.18344e-31	1.04448e-29	60.461
NCAM1	-1.21324	2.7007	-12.4237	2.32446e-31	1.10872e-29	60.3991
DPYSL2	-1.12299	5.75376	-12.4213	2.37949e-31	1.13094e-29	60.376
TLL1	-0.763051	2.31587	-12.4211	2.38485e-31	1.13094e-29	60.3737
TNFAIP8L3	-1.05646	2.92292	-12.416	2.50525e-31	1.18462e-29	60.325
MYC	-1.32034	6.37357	-12.414	2.55527e-31	1.2048e-29	60.3054
SULF2	-1.54352	5.16036	-12.4127	2.5883e-31	1.21687e-29	60.2927
PTGDS	-1.89764	5.18096	-12.4113	2.62279e-31	1.22956e-29	60.2796
PDE1A	-0.813541	2.61057	-12.4084	2.69824e-31	1.26133e-29	60.2516
RBBP8NL	1.1963	4.56307	12.4071	2.73235e-31	1.27365e-29	60.2391
KANK2	-1.04335	5.53201	-12.4046	2.80018e-31	1.29992e-29	60.2149
CPA3	-1.59593	4.40553	-12.4044	2.80456e-31	1.29992e-29	60.2133
PLEKHO1	-1.111	5.76486	-12.3998	2.93425e-31	1.3562e-29	60.1686
IFITM3	-1.29589	9.49228	-12.3979	2.98709e-31	1.37675e-29	60.151
RAB31	-1.19756	6.34335	-12.3853	3.3776e-31	1.55237e-29	60.0294
STAT4	-0.861633	3.21122	-12.3743	3.75904e-31	1.72286e-29	59.9235
EVA1C	-1.10287	3.81217	-12.3711	3.87788e-31	1.77238e-29	59.8927
PHLDA1	-1.32095	5.88476	-12.3707	3.89323e-31	1.77445e-29	59.8888
AEBP1	-1.96574	7.63289	-12.3676	4.01273e-31	1.81987e-29	59.8589
POPDC2	-1.04073	3.26389	-12.3675	4.01508e-31	1.81987e-29	59.8583
IQGAP2	-0.894539	3.51872	-12.3435	5.0702e-31	2.29179e-29	59.6275
RASGRP2	-0.899036	2.92843	-12.3283	5.87154e-31	2.64671e-29	59.4823
IL2RA	-1.08619	3.41274	-12.3279	5.89566e-31	2.6503e-29	59.4783
TLN1	-0.719067	7.19362	-12.3269	5.9525e-31	2.66854e-29	59.4688
PTGER2	-0.837734	2.92787	-12.3251	6.05457e-31	2.7069e-29	59.452
DPT	-1.89811	3.68622	-12.324	6.12415e-31	2.73057e-29	59.4407
TNFSF8	-0.657041	2.32246	-12.316	6.61602e-31	2.94189e-29	59.3642
ITGAX	-1.06617	4.07586	-12.311	6.94311e-31	3.07899e-29	59.3165
CHSY3	-0.750177	2.75311	-12.3072	7.20378e-31	3.18598e-29	59.28
FAM107A	-0.968527	2.73018	-12.3069	7.22767e-31	3.18795e-29	59.2768
PRKG1	-0.90847	3.22649	-12.3001	7.7185e-31	3.39531e-29	59.2118
MS4A4A	-1.16393	3.86395	-12.2882	8.65709e-31	3.79801e-29	59.0982
NRXN2	-0.70197	2.316	-12.283	9.10505e-31	3.98388e-29	59.0483
CD209	-1.19663	3.26386	-12.2778	9.57225e-31	4.17717e-29	58.9988
PRELP	-1.45212	3.88814	-12.273	1.00276e-30	4.36428e-29	58.9529
CHRDL1	-1.32064	2.81669	-12.2684	1.04898e-30	4.55337e-29	58.9083
DOCK11	-1.10055	4.30216	-12.2586	1.15214e-30	4.98794e-29	58.8155
BHMT2	-0.86949	2.45735	-12.2569	1.17152e-30	5.05848e-29	58.799
F13A1	-1.44235	4.94075	-12.2508	1.24288e-30	5.35252e-29	58.7405
RNF122	-0.776868	4.76295	-12.2472	1.28711e-30	5.52852e-29	58.7059
KIAA1755	-0.81821	2.47851	-12.2439	1.32845e-30	5.69116e-29	58.6746
LAMA2	-1.01451	4.41486	-12.2434	1.33471e-30	5.70312e-29	58.67
CSRP1	-1.04575	7.37383	-12.2423	1.34932e-30	5.75056e-29	58.6592
CD300C	-0.816378	2.55663	-12.2289	1.53515e-30	6.52558e-29	58.5316
BATF3	-0.725829	2.6601	-12.2277	1.55384e-30	6.58795e-29	58.5196
PI15	-0.940795	2.66098	-12.2259	1.58107e-30	6.68614e-29	58.5024
DUSP5	-1.32996	6.51132	-12.2214	1.65109e-30	6.96428e-29	58.4595
ARL4C	-1.02155	4.90357	-12.2205	1.66479e-30	7.00407e-29	58.4514
PGM5	-1.73455	3.88376	-12.2137	1.77761e-30	7.45961e-29	58.3865
ITK	-0.982988	2.99936	-12.2131	1.78799e-30	7.484e-29	58.3807
TCEAL7	-1.02532	3.09668	-12.2092	1.85612e-30	7.74941e-29	58.3438
CSF1	-0.94319	4.02841	-12.2047	1.93835e-30	8.07219e-29	58.3009
IGFBP5	-2.00743	6.68977	-12.2028	1.97492e-30	8.20369e-29	58.2824
SLC39A14	-0.950117	4.33558	-12.2009	2.01158e-30	8.33484e-29	58.2642
ZFPM2	-0.983851	3.05946	-12.1979	2.07115e-30	8.56007e-29	58.2353
XIRP1	-0.605622	1.84794	-12.1949	2.13003e-30	8.77501e-29	58.2076
PID1	-0.890238	2.89035	-12.1948	2.13385e-30	8.77501e-29	58.2058
CD93	-1.00918	5.21533	-12.1933	2.16462e-30	8.87927e-29	58.1917
NRROS	-0.813027	3.32575	-12.1926	2.17957e-30	8.9183e-29	58.1848
ZNF521	-1.03538	3.56968	-12.1849	2.34709e-30	9.57988e-29	58.1116
TEK	-0.821209	3.56172	-12.1809	2.43762e-30	9.92469e-29	58.0742
HSPA12B	-0.841521	3.3746	-12.1796	2.46956e-30	1.00298e-28	58.0613
TRPS1	-0.993426	3.56353	-12.176	2.55547e-30	1.03531e-28	58.0275
TAGAP	-0.979714	3.22281	-12.1736	2.6154e-30	1.05698e-28	58.0045
LDB2	-0.774998	3.80458	-12.1715	2.66937e-30	1.07614e-28	57.9843
HPGDS	-0.703582	2.62852	-12.1695	2.72029e-30	1.09398e-28	57.9656
TRPV2	-0.930108	3.87185	-12.1683	2.75412e-30	1.10253e-28	57.9534
ITGB2	-1.53079	5.63934	-12.1682	2.75498e-30	1.10253e-28	57.9531
SGTB	-0.63157	3.018	-12.1609	2.95729e-30	1.18062e-28	57.883
IL6ST	-0.964758	5.56619	-12.1504	3.27007e-30	1.30231e-28	57.7836
ACVRL1	-0.794017	4.52091	-12.1499	3.28565e-30	1.30535e-28	57.7788
HSPB7	-1.38521	2.91713	-12.1413	3.56967e-30	1.41476e-28	57.6968
COX7A1	-1.15756	4.77071	-12.1394	3.63345e-30	1.43657e-28	57.6793
HGF	-0.923073	2.83108	-12.137	3.72012e-30	1.4673e-28	57.656
ICAM1	-1.40082	5.31109	-12.1341	3.82502e-30	1.50506e-28	57.6285
IRF8	-1.28171	4.11392	-12.1273	4.08224e-30	1.60243e-28	57.5641
SACS	-0.859207	3.27737	-12.1258	4.14331e-30	1.62252e-28	57.5494
GREM1	-1.58565	3.45132	-12.122	4.29598e-30	1.6783e-28	57.5136
CFL2	-0.909778	4.43198	-12.1133	4.67191e-30	1.82082e-28	57.4307
COL15A1	-1.33684	5.71774	-12.1069	4.96489e-30	1.93043e-28	57.3705
RASA3	-1.01247	4.62804	-12.1024	5.18385e-30	2.0108e-28	57.3278
GGT5	-1.02312	4.30577	-12.1014	5.23561e-30	2.02608e-28	57.318
PDE5A	-0.94065	3.93387	-12.0969	5.46533e-30	2.11e-28	57.2755
PIK3R6	-0.540089	2.37574	-12.0922	5.71718e-30	2.19711e-28	57.231
FGF10	-0.786817	2.26725	-12.0922	5.71773e-30	2.19711e-28	57.2309
CD28	-0.704075	2.5465	-12.0874	5.98399e-30	2.29405e-28	57.1858
CTSG	-1.48491	3.28213	-12.076	6.67481e-30	2.55292e-28	57.0778
GNG2	-0.866828	3.09386	-12.0722	6.92329e-30	2.6418e-28	57.0416
NR3C1	-0.848982	4.36787	-12.0712	6.99457e-30	2.66281e-28	57.0315
ACOX2	-0.915962	2.76188	-12.0689	7.14835e-30	2.71505e-28	57.01
CST7	-1.29496	4.20034	-12.0468	8.8347e-30	3.3478e-28	56.8005
MAPRE2	-0.950733	4.61466	-12.041	9.33493e-30	3.52921e-28	56.746
MOXD1	-1.43861	4.17627	-12.0395	9.46994e-30	3.57202e-28	56.7318
CORO1C	-0.837738	6.67773	-12.0385	9.56558e-30	3.59982e-28	56.7219
SH2B3	-0.896559	4.37068	-12.0351	9.87335e-30	3.70714e-28	56.6906
CYBB	-1.39587	5.14288	-12.0309	1.02807e-29	3.85126e-28	56.6506
RBPMS2	-1.407	4.18453	-12.0301	1.03586e-29	3.8716e-28	56.6431
RCAN1	-1.11021	5.25298	-12.0174	1.16927e-29	4.36032e-28	56.5233
TYROBP	-1.49819	7.11148	-12.0031	1.3415e-29	4.99123e-28	56.3874
ITGA7	-1.09894	4.22213	-11.9995	1.38834e-29	5.15381e-28	56.3534
NID1	-1.01536	5.68203	-11.9982	1.40554e-29	5.20591e-28	56.3413
SGCD	-0.832348	2.39681	-11.99	1.51995e-29	5.61698e-28	56.2639
AIF1	-1.34268	4.79488	-11.9835	1.61623e-29	5.95934e-28	56.2031
FAP	-1.38757	3.86409	-11.9786	1.69395e-29	6.2319e-28	56.1567
VSIG4	-1.45672	4.38883	-11.9745	1.76101e-29	6.46412e-28	56.1183
P4HA3	-0.932286	2.90299	-11.969	1.85583e-29	6.79698e-28	56.0664
CASS4	-0.519635	2.37471	-11.9662	1.90755e-29	6.97084e-28	56.0392
EVI2B	-1.25759	4.21283	-11.9644	1.94026e-29	7.06447e-28	56.0224
MS4A6A	-1.28611	4.6004	-11.9643	1.94178e-29	7.06447e-28	56.0216
FLRT2	-0.57815	2.16698	-11.9588	2.04521e-29	7.42431e-28	55.9703
DES	-3.21418	6.43278	-11.9431	2.37645e-29	8.60044e-28	55.8218
CD53	-1.36894	5.26525	-11.9429	2.37969e-29	8.60044e-28	55.8205
SORBS1	-1.46448	4.12385	-11.9425	2.39024e-29	8.61958e-28	55.8161
MCAM	-0.954713	5.45239	-11.9414	2.41416e-29	8.68675e-28	55.8063
ANXA6	-1.17506	5.91559	-11.9298	2.69626e-29	9.68057e-28	55.697
WAS	-1.15195	4.78447	-11.9281	2.74127e-29	9.82068e-28	55.6806
ARSI	-1.04531	2.74634	-11.9256	2.80759e-29	1.00364e-27	55.657
PDGFC	-1.06159	4.02001	-11.9249	2.82444e-29	1.00747e-27	55.651
SCRG1	-1.07865	2.38624	-11.9226	2.8888e-29	1.02819e-27	55.6288
ADAMTSL1	-0.668994	2.35862	-11.921	2.93247e-29	1.04147e-27	55.6139
HCK	-1.20835	4.07655	-11.9203	2.95067e-29	1.04567e-27	55.6078
PLEK	-1.39229	4.50871	-11.9141	3.13233e-29	1.10766e-27	55.5487
CILP	-1.64241	3.16663	-11.9118	3.19971e-29	1.12905e-27	55.5277
TPM1	-1.23847	6.42057	-11.9092	3.27956e-29	1.15474e-27	55.5033
FSTL1	-1.1633	7.59174	-11.9032	3.47178e-29	1.2198e-27	55.447
GNG11	-0.981602	5.12743	-11.9011	3.54231e-29	1.24193e-27	55.4271
PI16	-1.37936	2.59834	-11.8881	4.00686e-29	1.4018e-27	55.3052
CHST15	-1.17989	3.68884	-11.8872	4.04122e-29	1.41082e-27	55.2968
SLC9B2	-0.622347	2.73047	-11.8859	4.09453e-29	1.42639e-27	55.2838
OLFM1	-0.937312	2.81726	-11.8841	4.16307e-29	1.4472e-27	55.2674
MXRA8	-1.24624	5.06031	-11.8809	4.29344e-29	1.48936e-27	55.2369
GPR171	-1.02474	2.85383	-11.8791	4.36396e-29	1.51063e-27	55.2208
MXRA7	-0.849072	4.19802	-11.8787	4.38141e-29	1.51176e-27	55.2168
SPI1	-1.28442	5.0024	-11.8785	4.39209e-29	1.51176e-27	55.2144
PCOLCE	-1.25505	6.24248	-11.8782	4.40366e-29	1.51176e-27	55.2118
MBNL1	-0.58424	5.06009	-11.8782	4.40408e-29	1.51176e-27	55.2117
LILRA5	-0.933676	2.88837	-11.8754	4.52094e-29	1.54863e-27	55.1858
SLC22A3	-1.16515	2.80197	-11.8741	4.57694e-29	1.56455e-27	55.1737
PAPSS2	-1.09111	4.96644	-11.8734	4.60806e-29	1.57191e-27	55.167
SCARF2	-1.08941	3.90605	-11.8659	4.94979e-29	1.68498e-27	55.0962
OLFML1	-0.939845	3.32882	-11.8616	5.15649e-29	1.75171e-27	55.0558
MEF2D	-0.561994	5.53471	-11.858	5.33279e-29	1.80786e-27	55.0225
FCGR2A	-1.22781	4.731	-11.8567	5.39738e-29	1.82598e-27	55.0106
ANXA5	-1.06634	8.3821	-11.8529	5.59742e-29	1.88976e-27	54.9746
MPEG1	-1.10524	4.13361	-11.8518	5.65641e-29	1.90576e-27	54.9643
ARHGAP31	-0.802636	4.16957	-11.8509	5.70395e-29	1.91784e-27	54.956
VCAM1	-1.20879	4.73821	-11.8506	5.72062e-29	1.91951e-27	54.9531
SPRY1	-0.945875	5.77154	-11.8502	5.744e-29	1.92342e-27	54.9491
RGS9	-0.751223	2.646	-11.8482	5.85268e-29	1.95582e-27	54.9305
CCL21	-2.05497	4.10785	-11.835	6.63124e-29	2.21149e-27	54.807
HAVCR2	-1.1661	4.16337	-11.8344	6.66753e-29	2.21908e-27	54.8016
PARVG	-1.01764	3.61495	-11.8341	6.69043e-29	2.2222e-27	54.7982
COL5A2	-1.53836	7.12746	-11.8222	7.48428e-29	2.48085e-27	54.6874
ALDH1B1	-1.0213	5.39589	-11.82	7.64484e-29	2.52896e-27	54.6664
KLF4	-1.03404	4.93172	-11.8171	7.85754e-29	2.59409e-27	54.6392
APCDD1L	-0.886205	2.24567	-11.8149	8.01873e-29	2.64199e-27	54.6192
FNBP1	-0.87459	5.74756	-11.8015	9.10231e-29	2.993e-27	54.4938
TBXAS1	-0.985174	4.20907	-11.8004	9.19812e-29	3.01846e-27	54.4835
TMOD1	-1.14532	3.0883	-11.7968	9.519e-29	3.11752e-27	54.4496
GSN	-0.906826	7.34148	-11.7934	9.83409e-29	3.2143e-27	54.4174
MFAP4	-1.80929	6.18058	-11.7881	1.03361e-28	3.37167e-27	54.3681
LY96	-1.28857	5.21909	-11.7854	1.06079e-28	3.45345e-27	54.3425
MRAS	-0.865939	3.67838	-11.7827	1.08758e-28	3.53366e-27	54.3178
SMTN	-0.981697	5.13311	-11.7799	1.11702e-28	3.62214e-27	54.2914
CSF1R	-1.37447	5.11839	-11.7728	1.19419e-28	3.86476e-27	54.2253
CSDC2	-1.04762	2.56781	-11.7537	1.43048e-28	4.62032e-27	54.0468
ITGA1	-0.860351	4.85906	-11.7514	1.46208e-28	4.71313e-27	54.0252
CAMK2A	-0.496677	1.88082	-11.7453	1.54834e-28	4.9814e-27	53.9685
MRC1	-1.14183	4.70745	-11.7439	1.5685e-28	5.03638e-27	53.9557
HLF	-0.65238	2.09949	-11.7308	1.77471e-28	5.68738e-27	53.8336
CLEC4A	-0.862363	3.48257	-11.7281	1.82127e-28	5.82522e-27	53.808
HLX	-0.662498	3.5123	-11.7277	1.82711e-28	5.83253e-27	53.8048
CHN1	-0.890045	4.11909	-11.7247	1.87898e-28	5.98648e-27	53.7771
PECAM1	-0.848723	4.73917	-11.7165	2.03081e-28	6.45765e-27	53.7003
ACTC1	-2.27757	3.68608	-11.7155	2.05056e-28	6.50785e-27	53.6907
ABL2	-0.537192	3.78928	-11.7031	2.30294e-28	7.29473e-27	53.576
ITM2A	-1.19851	4.59373	-11.7	2.37249e-28	7.49736e-27	53.5466
FAT4	-0.68306	2.68458	-11.6998	2.37605e-28	7.49736e-27	53.5451
ARHGAP9	-1.08476	3.61003	-11.6981	2.41423e-28	7.60322e-27	53.5293
SULF1	-1.81338	5.17	-11.6918	2.56231e-28	8.05411e-27	53.4704
MYH11	-2.2749	6.56968	-11.6867	2.68734e-28	8.43096e-27	53.4233
COL3A1	-1.84977	9.87413	-11.6854	2.72011e-28	8.51747e-27	53.4114
SPON1	-1.63183	4.92879	-11.6802	2.85649e-28	8.92748e-27	53.363
ABCC9	-0.738923	2.84642	-11.6768	2.94993e-28	9.20198e-27	53.3312
FOLR2	-1.30265	4.68302	-11.6387	4.21815e-28	1.31331e-26	52.9776
JPH2	-1.17116	3.26875	-11.6378	4.25377e-28	1.32189e-26	52.9693
DENND5A	-0.671821	5.55457	-11.6357	4.34041e-28	1.34626e-26	52.9493
TNFSF4	-0.760943	2.54166	-11.6351	4.36416e-28	1.35108e-26	52.9439
DOK2	-1.08166	3.54951	-11.6339	4.41277e-28	1.36355e-26	52.933
FAM110B	-0.786048	2.66434	-11.633	4.45003e-28	1.37248e-26	52.9247
CCL3	-1.2199	3.8492	-11.6322	4.4858e-28	1.37969e-26	52.9168
VENTX	-0.590986	2.2779	-11.632	4.49021e-28	1.37969e-26	52.9158
RUNX1T1	-0.608589	2.2703	-11.6313	4.52047e-28	1.38639e-26	52.9091
HAS1	-0.895702	2.25846	-11.6217	4.94951e-28	1.51514e-26	52.8195
PIK3R5	-0.732497	2.85272	-11.6147	5.28547e-28	1.61497e-26	52.7546
CCL19	-2.02278	4.42813	-11.6094	5.54969e-28	1.69255e-26	52.7063
TNFSF13B	-1.04362	3.49472	-11.6084	5.60458e-28	1.70612e-26	52.6966
LILRB2	-0.870525	2.779	-11.6031	5.89125e-28	1.79007e-26	52.6473
PODN	-1.39556	4.54987	-11.5993	6.10357e-28	1.85115e-26	52.6123
COL18A1	-1.07267	6.34762	-11.5951	6.34441e-28	1.92065e-26	52.574
LOX	-1.15928	3.88212	-11.5812	7.22617e-28	2.18356e-26	52.4454
TMEM100	-0.719221	2.3094	-11.5809	7.24627e-28	2.1856e-26	52.4426
SOD3	-1.37679	4.74758	-11.566	8.33034e-28	2.50797e-26	52.3048
CD14	-1.42323	5.92142	-11.5657	8.35239e-28	2.51e-26	52.3022
CTHRC1	-1.82001	6.53061	-11.5595	8.85593e-28	2.65645e-26	52.2443
HSD11B1	-1.08815	3.63213	-11.5587	8.91754e-28	2.67006e-26	52.2375
ST6GALNAC5	-0.863602	2.72101	-11.5493	9.73686e-28	2.91006e-26	52.1506
RND3	-1.00711	6.18417	-11.5376	1.08632e-27	3.24079e-26	52.0423
PROS1	-1.00062	4.45694	-11.5314	1.15048e-27	3.42597e-26	51.9856
SIRPA	-1.16237	5.27421	-11.5277	1.19108e-27	3.54046e-26	51.9513
CLEC10A	-1.02518	3.0837	-11.5271	1.19788e-27	3.55423e-26	51.9457
SGCA	-1.21127	2.88174	-11.526	1.20988e-27	3.58334e-26	51.9359
CSGALNACT2	-0.704122	5.13227	-11.5214	1.26293e-27	3.73372e-26	51.8934
TNFSF12	-0.741372	4.58058	-11.5201	1.27882e-27	3.77389e-26	51.8811
SPARC	-1.2816	9.20101	-11.5169	1.31789e-27	3.88221e-26	51.8513
COL5A1	-1.60158	7.05782	-11.5132	1.36398e-27	4.01079e-26	51.8173
PCSK1	-0.851306	2.2333	-11.5126	1.37174e-27	4.0264e-26	51.8117
RHOH	-0.707614	2.39689	-11.5012	1.52451e-27	4.4668e-26	51.7074
NID2	-1.04242	4.11552	-11.497	1.58667e-27	4.64064e-26	51.6678
COL1A2	-1.75948	9.68918	-11.4962	1.59767e-27	4.66451e-26	51.661
NGF	-0.823394	2.58293	-11.4947	1.62063e-27	4.71493e-26	51.6469
IL33	-1.46533	3.96798	-11.4947	1.62069e-27	4.71493e-26	51.6469
TSHZ3	-1.04648	3.73076	-11.4892	1.70554e-27	4.95299e-26	51.5964
NCF2	-1.14649	4.41569	-11.4867	1.74519e-27	5.05921e-26	51.5737
MRC2	-1.09829	5.36494	-11.485	1.77428e-27	5.13447e-26	51.5574
CFI	-1.18157	5.10613	-11.4845	1.78141e-27	5.146e-26	51.5534
CCR4	-0.855099	2.90178	-11.4812	1.83687e-27	5.2969e-26	51.5231
CTSK	-1.49531	7.30574	-11.4785	1.88427e-27	5.42406e-26	51.4979
CYTH4	-1.04705	3.59004	-11.4729	1.98466e-27	5.70302e-26	51.4466
GRK5	-0.74867	4.2321	-11.4608	2.2213e-27	6.37188e-26	51.3352
STK32B	-0.526745	2.25665	-11.4506	2.44202e-27	6.9928e-26	51.2416
PDCD1LG2	-0.934026	2.80442	-11.4477	2.50794e-27	7.16904e-26	51.2153
PAPPA	-0.742458	2.71426	-11.4464	2.53823e-27	7.24299e-26	51.2034
TGM2	-1.52398	6.6963	-11.4448	2.57791e-27	7.34346e-26	51.1881
MNDA	-1.16803	3.87351	-11.4437	2.60233e-27	7.40018e-26	51.1788
FMNL1	-0.827087	4.24873	-11.4385	2.73122e-27	7.75326e-26	51.131
FCN1	-0.897012	2.89824	-11.4349	2.8258e-27	8.00789e-26	51.0973
PTPN22	-0.823102	3.19995	-11.4326	2.88626e-27	8.16513e-26	51.0764
PAM	-0.956997	5.81165	-11.4297	2.96487e-27	8.37307e-26	51.0498
PLA2G5	-0.856435	2.39729	-11.4286	2.9946e-27	8.44251e-26	51.04
PLA2G4C	-0.82369	2.97591	-11.4226	3.16613e-27	8.91079e-26	50.9849
PIP4K2A	-0.759803	5.40971	-11.4224	3.1718e-27	8.91146e-26	50.9831
DCLK1	-0.629637	2.08939	-11.4184	3.29284e-27	9.23572e-26	50.9461
AFF3	-0.666731	2.2855	-11.4108	3.53311e-27	9.89271e-26	50.8765
SAMD4A	-0.78933	3.63234	-11.4079	3.62992e-27	1.01465e-25	50.8498
ISLR	-1.79528	4.9947	-11.4073	3.65065e-27	1.0187e-25	50.8442
CD37	-1.2583	4.27876	-11.4054	3.71362e-27	1.03452e-25	50.8273
C7	-1.84761	3.83331	-11.4017	3.84369e-27	1.06894e-25	50.7932
PIK3CD	-0.940404	4.16269	-11.3975	3.99714e-27	1.10973e-25	50.7545
S100B	-1.0401	3.27695	-11.3962	4.04439e-27	1.12095e-25	50.7429
ACTN1	-1.02059	7.42456	-11.3959	4.056e-27	1.12227e-25	50.7401
RGS4	-0.971897	2.88294	-11.3861	4.44304e-27	1.2273e-25	50.65
MFGE8	-1.05268	6.61207	-11.3708	5.11535e-27	1.41063e-25	50.5107
GNAL	-0.673525	2.61306	-11.3663	5.33653e-27	1.46916e-25	50.4689
UNC5C	-0.524586	2.37183	-11.3595	5.68123e-27	1.56143e-25	50.407
ACKR1	-1.61281	4.33075	-11.3572	5.80001e-27	1.59141e-25	50.3866
SERPINF1	-1.45047	7.15897	-11.3568	5.82551e-27	1.59574e-25	50.3822
TGFBI	-1.41276	7.16646	-11.3477	6.3374e-27	1.73307e-25	50.299
CHRD	-0.678749	2.60187	-11.347	6.37556e-27	1.7406e-25	50.2931
HCST	-1.20342	4.78211	-11.3427	6.63371e-27	1.80807e-25	50.2538
SLCO2B1	-1.12216	4.02897	-11.3408	6.75364e-27	1.83771e-25	50.2361
STK17B	-0.829668	4.86427	-11.3385	6.89668e-27	1.87352e-25	50.2154
SERPINE1	-1.53475	7.34496	-11.3297	7.48072e-27	2.02882e-25	50.1351
SORCS2	-0.998219	2.83101	-11.3293	7.51066e-27	2.03358e-25	50.1311
KCTD12	-1.03462	4.84949	-11.3218	8.04617e-27	2.17499e-25	50.063
AREG	-1.53081	5.37783	-11.3216	8.06499e-27	2.17649e-25	50.0607
GPC6	-1.2096	3.79683	-11.3176	8.36093e-27	2.25264e-25	50.0251
GPR65	-0.768912	2.82267	-11.317	8.40875e-27	2.26182e-25	50.0195
A2M	-1.21595	8.93308	-11.3166	8.44334e-27	2.2674e-25	50.0154
SDS	-1.04035	3.27838	-11.3154	8.53609e-27	2.28857e-25	50.0046
F10	-0.791053	2.7249	-11.3075	9.18034e-27	2.45728e-25	49.9327
IGFBP7	-1.04259	9.41171	-11.2964	1.01661e-26	2.7167e-25	49.8319
MSR1	-1.03442	3.78918	-11.2896	1.08282e-26	2.88892e-25	49.7695
MGP	-1.74663	7.86903	-11.2714	1.28028e-26	3.41021e-25	49.604
MYO1F	-0.907143	3.86873	-11.2707	1.28847e-26	3.42646e-25	49.5977
CD33	-0.591614	2.47086	-11.2665	1.33988e-26	3.5574e-25	49.559
OLFML2B	-1.23483	4.51211	-11.2592	1.43278e-26	3.7979e-25	49.4928
DYSF	-0.877399	4.79113	-11.2587	1.43931e-26	3.80907e-25	49.4883
CASQ2	-1.64748	3.24521	-11.2564	1.47022e-26	3.8846e-25	49.4673
CCL23	-0.777452	2.2783	-11.2522	1.52805e-26	4.03092e-25	49.4291
PDE3A	-0.628706	2.77178	-11.2506	1.54994e-26	4.08209e-25	49.4151
GPR132	-0.764894	2.83482	-11.2493	1.56946e-26	4.12687e-25	49.4027
SOX5	-0.430296	2.32027	-11.2477	1.5918e-26	4.17891e-25	49.3888
MAF	-0.996131	4.72278	-11.2444	1.64094e-26	4.30104e-25	49.3587
RAB27A	-0.666717	4.47832	-11.2352	1.78519e-26	4.67167e-25	49.2754
FAM180A	-0.578167	2.01896	-11.2293	1.88597e-26	4.92754e-25	49.2212
DMD	-0.909819	3.04159	-11.229	1.89028e-26	4.93096e-25	49.2189
CD48	-1.22972	3.85639	-11.2201	2.05189e-26	5.34405e-25	49.1378
IGF1	-0.767293	2.38592	-11.2158	2.13292e-26	5.54628e-25	49.0996
MITF	-0.781122	3.14448	-11.2146	2.15673e-26	5.5993e-25	49.0886
CREM	-0.550263	3.7744	-11.2125	2.19931e-26	5.70084e-25	49.0693
COL1A1	-1.77652	10.0266	-11.2115	2.22061e-26	5.74696e-25	49.0598
F2RL2	-0.835326	2.45931	-11.2105	2.23965e-26	5.78711e-25	49.0513
PDK4	-1.38888	5.05767	-11.2088	2.27524e-26	5.86983e-25	49.0357
EBF3	-0.594413	2.46885	-11.1931	2.62828e-26	6.76999e-25	48.8932
ALOX5AP	-1.31592	5.04414	-11.1827	2.89079e-26	7.4345e-25	48.7991
ANTXR2	-1.03775	4.61851	-11.1807	2.94468e-26	7.55751e-25	48.7809
FMO1	-0.841081	2.46573	-11.1805	2.94783e-26	7.55751e-25	48.7798
ATP1A2	-1.172	2.75923	-11.1751	3.09846e-26	7.93128e-25	48.7306
LOXL3	-0.662092	3.23632	-11.1748	3.10744e-26	7.94188e-25	48.7277
RBM24	-0.663306	2.05766	-11.1738	3.13435e-26	7.99819e-25	48.7192
ARHGEF17	-0.739127	4.72527	-11.1716	3.20049e-26	8.15429e-25	48.6985
KLHL4	-0.486949	1.91164	-11.1657	3.3776e-26	8.59219e-25	48.6453
PIK3AP1	-1.03102	3.74198	-11.1648	3.40387e-26	8.64563e-25	48.6377
CACNA2D1	-0.903155	3.408	-11.1635	3.44626e-26	8.73976e-25	48.6254
TGFB2	-0.796549	2.54298	-11.156	3.69035e-26	9.34433e-25	48.5578
ZNF469	-0.936503	3.41276	-11.1555	3.70722e-26	9.37258e-25	48.5533
PDZRN4	-0.895805	2.30797	-11.1489	3.93769e-26	9.93994e-25	48.4937
IL18RAP	-0.651385	2.49277	-11.1464	4.03013e-26	1.01576e-24	48.4708
FOXC2	-0.864633	2.72965	-11.1417	4.20461e-26	1.05812e-24	48.4289
PALD1	-0.728856	3.72542	-11.1371	4.3839e-26	1.10155e-24	48.3876
ERBB3	1.13799	7.49789	11.1308	4.64565e-26	1.16553e-24	48.3303
FAM43A	-0.813512	3.81933	-11.1267	4.82326e-26	1.20824e-24	48.2933
DAAM2	-0.792071	3.38632	-11.1237	4.95614e-26	1.23964e-24	48.2664
F2R	-0.933841	5.132	-11.1189	5.17951e-26	1.29317e-24	48.2228
TRAF1	-0.748374	3.84427	-11.1187	5.18592e-26	1.29317e-24	48.2216
STARD9	-0.542324	2.81266	-11.118	5.2228e-26	1.30039e-24	48.2146
FLT3	-0.604073	2.3122	-11.1086	5.69028e-26	1.41464e-24	48.1299
BDKRB1	-0.884574	2.89036	-11.1055	5.84992e-26	1.45212e-24	48.1026
RGS22	-0.228812	1.70969	-11.1032	5.97439e-26	1.48078e-24	48.0818
FN1	-1.5972	7.69664	-11.0989	6.21753e-26	1.53872e-24	48.0424
CACNA1C	-0.828445	3.19817	-11.0941	6.49254e-26	1.60436e-24	47.9996
ARHGEF25	-1.00614	4.50744	-11.0939	6.5061e-26	1.60529e-24	47.9975
CD84	-0.799653	2.6904	-11.0933	6.543e-26	1.61198e-24	47.9919
HAPLN3	-1.07028	3.95679	-11.0901	6.73237e-26	1.65614e-24	47.9637
CADM3	-1.00317	2.34227	-11.0895	6.76829e-26	1.66249e-24	47.9585
LAT2	-0.778585	3.17622	-11.0855	7.01901e-26	1.72149e-24	47.9225
GULP1	-0.691518	2.64006	-11.0831	7.17696e-26	1.7576e-24	47.9006
TPST1	-0.932707	5.43502	-11.0742	7.78078e-26	1.90264e-24	47.8207
PRICKLE1	-0.964296	3.64179	-11.0671	8.30469e-26	2.02773e-24	47.7564
FIBIN	-1.21319	3.07961	-11.0637	8.56713e-26	2.0887e-24	47.7256
FBXO32	-1.09211	5.1712	-11.0608	8.78909e-26	2.13964e-24	47.7003
CNTN1	-1.25531	3.11856	-11.06	8.85438e-26	2.15234e-24	47.693
AKAP13	-0.616392	5.64474	-11.0582	9.00505e-26	2.18572e-24	47.6764
C5AR2	-0.621438	2.30899	-11.0573	9.07552e-26	2.19957e-24	47.6687
PTPRD	-0.841873	2.53666	-11.0508	9.63153e-26	2.33089e-24	47.6099
SGIP1	-0.580919	2.41558	-11.0495	9.74036e-26	2.35375e-24	47.5988
COL8A2	-1.17975	3.9181	-11.0485	9.83055e-26	2.37205e-24	47.5897
CMKLR1	-0.937996	3.09445	-11.0393	1.06938e-25	2.57657e-24	47.5065
C1QTNF1	-1.03858	3.90492	-11.0366	1.09515e-25	2.63479e-24	47.483
LST1	-0.898061	3.33707	-11.0358	1.10358e-25	2.65118e-24	47.4754
OMD	-1.02998	2.43906	-11.0352	1.10975e-25	2.66209e-24	47.4699
SPHK1	-1.11822	3.75529	-11.034	1.12208e-25	2.68775e-24	47.459
SOBP	-0.798163	3.15534	-11.0272	1.19314e-25	2.8538e-24	47.3983
GNAO1	-0.739364	2.25708	-11.0266	1.19965e-25	2.86519e-24	47.393
IL15RA	-0.895674	3.81254	-11.0238	1.23022e-25	2.93392e-24	47.3681
TCEAL2	-1.20792	2.68167	-11.0236	1.23338e-25	2.93721e-24	47.3656
SFRP4	-2.235	4.73549	-11.0168	1.31122e-25	3.11804e-24	47.3051
LY86	-1.05534	3.6143	-11.0144	1.33987e-25	3.18156e-24	47.2837
SMIM3	-0.89639	4.75374	-11.0127	1.36166e-25	3.22862e-24	47.2678
PCOLCE2	-1.14567	2.89804	-11.0098	1.39778e-25	3.30949e-24	47.2419
ARSJ	-0.73776	2.38314	-11.0057	1.45063e-25	3.42969e-24	47.2053
TSPAN2	-1.15032	3.86462	-11.0041	1.4709e-25	3.47259e-24	47.1916
ALDH2	-1.26235	5.31019	-11.0037	1.4768e-25	3.48152e-24	47.1876
RFTN2	-0.560644	3.00258	-11.0033	1.48283e-25	3.49071e-24	47.1836
FAIM2	-0.689737	2.09049	-11.0017	1.50435e-25	3.53631e-24	47.1693
PELI2	-0.843927	3.25307	-10.9948	1.60135e-25	3.75893e-24	47.1076
ASB2	-0.887502	2.91131	-10.985	1.74921e-25	4.10014e-24	47.0204
LAYN	-0.885018	3.64045	-10.97	2.00442e-25	4.69165e-24	46.8858
TCF7L1	-0.997172	4.02514	-10.9618	2.15919e-25	5.04673e-24	46.8123
ADAMTSL3	-0.659215	2.25773	-10.9533	2.33033e-25	5.43899e-24	46.737
SRF	-0.53807	6.5117	-10.9515	2.3691e-25	5.52161e-24	46.7207
GIMAP8	-0.806956	4.01959	-10.9485	2.4335e-25	5.66368e-24	46.6942
COL4A2	-1.0192	7.45995	-10.948	2.44478e-25	5.68186e-24	46.6896
FCER1G	-1.35604	6.26634	-10.9476	2.45518e-25	5.69797e-24	46.6854
GIMAP4	-0.927201	5.09435	-10.946	2.49004e-25	5.77071e-24	46.6715
ADAMTS10	-0.647911	2.95242	-10.9382	2.67055e-25	6.1803e-24	46.6023
TMEM119	-1.18527	4.29787	-10.9348	2.75397e-25	6.36439e-24	46.572
STC1	-1.09226	4.80867	-10.9341	2.77358e-25	6.40069e-24	46.5649
HTRA1	-1.20223	7.72516	-10.9328	2.80456e-25	6.46308e-24	46.554
TOX	-0.916798	2.9352	-10.9307	2.85907e-25	6.57946e-24	46.535
HSD17B6	-1.06459	3.51246	-10.9273	2.94777e-25	6.7741e-24	46.5048
TSPAN32	-0.476052	2.10954	-10.9259	2.98476e-25	6.8495e-24	46.4925
PLXNA4	-0.422734	1.92429	-10.9217	3.09997e-25	7.10394e-24	46.455
PCBP3	-0.542117	2.15011	-10.9186	3.18765e-25	7.2947e-24	46.4275
PKIG	-0.809933	5.53317	-10.9148	3.30082e-25	7.54316e-24	46.393
GZMK	-1.22406	3.41033	-10.9132	3.34796e-25	7.64023e-24	46.379
DSE	-0.86592	4.2531	-10.8965	3.89069e-25	8.86644e-24	46.2306
KCNIP3	-0.601435	2.24105	-10.8963	3.89774e-25	8.8702e-24	46.2288
HK3	-1.06546	3.17575	-10.8958	3.91602e-25	8.89946e-24	46.2242
SDC2	-1.02496	4.97999	-10.8951	3.9434e-25	8.94928e-24	46.2173
TIE1	-0.722199	3.83619	-10.894	3.98168e-25	9.02368e-24	46.2078
CCND2	-1.20994	4.70218	-10.8915	4.072e-25	9.21563e-24	46.1856
SLC9A9	-0.870543	4.11419	-10.8882	4.19319e-25	9.47684e-24	46.1566
MMP2	-1.33703	7.76275	-10.8807	4.48873e-25	1.01308e-23	46.0894
BIRC3	-1.18165	4.75898	-10.8724	4.83662e-25	1.0901e-23	46.0156
RERG	-0.851112	3.08547	-10.8715	4.87519e-25	1.09728e-23	46.0078
LUM	-1.72989	8.19394	-10.8706	4.91409e-25	1.10453e-23	45.9999
KLF10	-0.762559	5.42628	-10.8688	4.99725e-25	1.12168e-23	45.9834
GALNT15	-0.804921	2.45898	-10.864	5.21412e-25	1.16876e-23	45.9414
C1QTNF2	-0.528209	2.34831	-10.8526	5.77619e-25	1.29298e-23	45.8403
FERMT3	-1.04071	4.63329	-10.8519	5.81303e-25	1.29946e-23	45.834
ITGAM	-1.00517	3.68035	-10.85	5.91567e-25	1.3206e-23	45.8167
DENND5B	-0.665801	2.86242	-10.8478	6.03342e-25	1.34352e-23	45.7972
LGALS2	-1.02313	3.27013	-10.8478	6.03471e-25	1.34352e-23	45.797
MAMDC2	-1.03832	2.96551	-10.8136	8.20003e-25	1.82312e-23	45.4942
SGCB	-0.740263	4.56206	-10.8064	8.74529e-25	1.94172e-23	45.4306
SIGLEC1	-0.925561	3.06633	-10.8062	8.76675e-25	1.94385e-23	45.4281
PCDH18	-0.748147	3.17849	-10.8042	8.92177e-25	1.97555e-23	45.4108
SELE	-1.28617	3.25873	-10.8036	8.97305e-25	1.98423e-23	45.4052
CD109	-1.03976	3.73084	-10.8031	9.01252e-25	1.99028e-23	45.4008
CCDC102A	-0.771743	3.89291	-10.8015	9.14184e-25	2.01612e-23	45.3868
P2RY10	-0.755057	2.51139	-10.7958	9.62258e-25	2.11929e-23	45.3361
ECSCR	-0.726648	3.79434	-10.7941	9.76848e-25	2.14677e-23	45.3213
CCDC170	-0.487485	2.3679	-10.794	9.7735e-25	2.14677e-23	45.3208
ANGPTL7	-0.60566	1.92455	-10.7896	1.01745e-24	2.23185e-23	45.2811
HABP4	-0.706934	4.44915	-10.7883	1.02876e-24	2.25365e-23	45.2701
RASGRP4	-0.438602	2.20192	-10.782	1.08909e-24	2.38264e-23	45.2138
TMEM184A	1.11584	5.42476	10.7619	1.30345e-24	2.8478e-23	45.0364
RAMP3	-0.862138	4.9276	-10.7613	1.31061e-24	2.85964e-23	45.031
ADCYAP1	-0.575051	1.98009	-10.7608	1.31612e-24	2.86785e-23	45.0268
ZBTB16	-1.09286	3.27328	-10.7596	1.33062e-24	2.8956e-23	45.016
SLAMF6	-0.959091	3.02111	-10.7535	1.40427e-24	3.05183e-23	44.9628
SLC2A4	-0.870369	2.64834	-10.7372	1.62455e-24	3.52587e-23	44.8189
NLRC4	-0.480588	2.58347	-10.7323	1.69807e-24	3.68057e-23	44.7752
BIN2	-0.910455	3.37329	-10.7301	1.7313e-24	3.74766e-23	44.756
RTN1	-0.776403	2.60115	-10.7199	1.89594e-24	4.09862e-23	44.6663
AQP1	-0.926993	6.62937	-10.7098	2.07524e-24	4.48033e-23	44.5771
CPVL	-1.2019	4.94156	-10.7093	2.0835e-24	4.49226e-23	44.5732
DPYD	-1.07953	4.46841	-10.7065	2.13649e-24	4.60045e-23	44.5484
C1QA	-1.58711	7.72098	-10.7001	2.26265e-24	4.86573e-23	44.4917
CCDC88A	-0.756004	3.55273	-10.6941	2.38673e-24	5.12585e-23	44.439
C1QC	-1.52756	7.16111	-10.688	2.51948e-24	5.40387e-23	44.3855
TXLNB	-0.4523	2.15815	-10.6811	2.67926e-24	5.73908e-23	44.3248
EHD2	-0.979802	6.15905	-10.671	2.93011e-24	6.26822e-23	44.2364
CSF3	-1.04742	2.33309	-10.6609	3.20706e-24	6.85174e-23	44.1472
ADAM12	-1.10925	4.04456	-10.6555	3.3646e-24	7.17897e-23	44.0999
ITGA4	-0.726989	3.483	-10.6525	3.4546e-24	7.36143e-23	44.0738
EIF5A2	-0.752434	3.03116	-10.6506	3.51297e-24	7.47612e-23	44.0572
ATXN1	-0.74646	4.00456	-10.646	3.66011e-24	7.77915e-23	44.0167
PLK3	-0.699076	5.03965	-10.6448	3.70114e-24	7.85618e-23	44.0057
ASPN	-1.49752	4.49366	-10.6397	3.87101e-24	8.20615e-23	43.9614
STX11	-0.785592	3.24869	-10.6385	3.91349e-24	8.28548e-23	43.9506
CXCL13	-1.81222	4.35118	-10.6377	3.94184e-24	8.33476e-23	43.9435
ARHGAP15	-0.824477	3.66871	-10.6372	3.95776e-24	8.35765e-23	43.9395
MFNG	-0.80093	3.654	-10.634	4.07086e-24	8.58543e-23	43.9117
NXN	-1.0229	4.70743	-10.6329	4.11185e-24	8.66076e-23	43.9018
ADAMTS12	-0.977017	3.60341	-10.6315	4.16395e-24	8.75925e-23	43.8894
MKX	-0.638546	2.04314	-10.6204	4.59417e-24	9.65188e-23	43.7923
PLEKHA4	-0.981726	4.20177	-10.6189	4.65791e-24	9.77327e-23	43.7787
SRL	-0.425797	1.93526	-10.6134	4.88752e-24	1.02419e-22	43.7311
ABL1	-0.628688	6.18095	-10.6111	4.99055e-24	1.04445e-22	43.7105
SPN	-0.800514	3.22166	-10.6042	5.30602e-24	1.10906e-22	43.65
SOD2	-0.937541	6.36124	-10.6029	5.36618e-24	1.12021e-22	43.6389
ADCY4	-0.66788	3.7895	-10.5973	5.63569e-24	1.17497e-22	43.5905
OGFRL1	-0.803529	3.62303	-10.5925	5.88208e-24	1.22479e-22	43.5482
ICOS	-0.80307	2.73365	-10.5898	6.02375e-24	1.2527e-22	43.5247
EYA4	-0.523026	2.1795	-10.583	6.40103e-24	1.32947e-22	43.4648
TMCC3	-0.724439	3.16656	-10.5821	6.44768e-24	1.33747e-22	43.4576
NTNG2	-0.493343	2.2844	-10.5781	6.68145e-24	1.38421e-22	43.4224
NGFR	-1.1045	2.88053	-10.576	6.80652e-24	1.40834e-22	43.4041
LZTS1	-0.714544	3.04219	-10.5727	7.01193e-24	1.44902e-22	43.3747
POU6F1	-0.550838	2.97033	-10.5699	7.18458e-24	1.48283e-22	43.3507
PPFIBP2	1.0243	6.83839	10.5691	7.236e-24	1.49156e-22	43.3437
PPP1R18	-0.801952	5.80917	-10.5689	7.2474e-24	1.49204e-22	43.3421
CD72	-0.810178	3.2442	-10.5681	7.29881e-24	1.50074e-22	43.3352
PLXNC1	-0.814052	3.68726	-10.5655	7.47091e-24	1.5342e-22	43.3121
PDPN	-1.21972	5.18617	-10.558	7.98084e-24	1.63687e-22	43.247
DOK5	-0.682836	2.38072	-10.556	8.12161e-24	1.66366e-22	43.2297
ADAMTS3	-0.45344	2.18064	-10.5515	8.44993e-24	1.72876e-22	43.1906
SOX17	-0.679179	3.07019	-10.5493	8.61835e-24	1.76102e-22	43.1711
CLEC3B	-0.986623	4.08576	-10.5435	9.07038e-24	1.85108e-22	43.1206
NXPE3	-0.604719	3.34243	-10.5407	9.29555e-24	1.89468e-22	43.0964
VMO1	-0.959669	3.50168	-10.5402	9.33704e-24	1.90077e-22	43.092
ANTXR1	-1.04908	6.65841	-10.5367	9.63159e-24	1.9583e-22	43.0613
EYA1	-0.853995	2.39264	-10.5351	9.76849e-24	1.98368e-22	43.0474
PNMA1	-0.884391	5.01636	-10.5309	1.01383e-23	2.05624e-22	43.0107
CCDC3	-0.831498	4.23959	-10.5274	1.04554e-23	2.11793e-22	42.9803
FPR3	-1.19216	4.16409	-10.5262	1.05668e-23	2.13785e-22	42.9698
GPX8	-1.00023	4.33304	-10.5219	1.09762e-23	2.21795e-22	42.9323
SEC23A	-0.625689	5.6907	-10.5161	1.15517e-23	2.33138e-22	42.8818
BCL2A1	-1.15491	3.80904	-10.5159	1.15697e-23	2.33213e-22	42.8803
UCHL1	-1.559	4.53158	-10.5118	1.19983e-23	2.41556e-22	42.8444
IGSF21	-0.750712	2.42623	-10.5103	1.21613e-23	2.44537e-22	42.8311
LRRC17	-0.964837	3.0127	-10.5033	1.29311e-23	2.59698e-22	42.7705
NCOA7	-0.816226	5.41864	-10.5001	1.32991e-23	2.66762e-22	42.7428
SLA2	-0.722361	2.54484	-10.4991	1.34157e-23	2.68772e-22	42.7341
SASH3	-1.1126	3.96313	-10.4837	1.53708e-23	3.07566e-22	42.5998
PARVA	-0.654754	5.16833	-10.482	1.56003e-23	3.11778e-22	42.5852
ASB5	-0.835809	2.02674	-10.4807	1.57816e-23	3.15018e-22	42.5738
SHE	-0.497321	2.47934	-10.4793	1.59703e-23	3.18397e-22	42.562
NUDT11	-0.742376	2.30396	-10.4736	1.67918e-23	3.3437e-22	42.5125
NRP1	-0.853494	4.72804	-10.4689	1.75022e-23	3.48092e-22	42.4716
PPP1R16B	-0.772918	3.10848	-10.4687	1.75363e-23	3.48348e-22	42.4697
FNDC1	-1.49015	3.55661	-10.4605	1.88318e-23	3.73631e-22	42.3993
SLC8A1	-0.613378	3.01073	-10.4593	1.90446e-23	3.77396e-22	42.3882
TLR1	-0.795862	3.17935	-10.4436	2.18504e-23	4.32475e-22	42.2526
ADAMTS8	-0.845226	2.80383	-10.4346	2.36519e-23	4.67568e-22	42.1743
HPSE2	-1.00583	2.52447	-10.4299	2.46485e-23	4.86682e-22	42.1336
MCL1	-0.646632	7.6335	-10.4258	2.55351e-23	5.03581e-22	42.0987
C1QB	-1.56905	7.17403	-10.4111	2.90565e-23	5.72339e-22	41.9712
RUNX3	-0.943921	3.24326	-10.4019	3.14792e-23	6.19317e-22	41.8921
THY1	-1.15584	6.28743	-10.3924	3.42298e-23	6.72625e-22	41.8094
EID3	-0.703476	3.43006	-10.3898	3.50158e-23	6.87248e-22	41.787
SELPLG	-1.11966	4.66332	-10.3888	3.53e-23	6.91999e-22	41.779
IL3RA	-0.63905	4.09727	-10.3802	3.80634e-23	7.4528e-22	41.7046
CHSY1	-0.61602	6.33381	-10.3756	3.96213e-23	7.74859e-22	41.665
CFP	-0.697035	2.70978	-10.3643	4.37375e-23	8.54338e-22	41.5675
RARRES2	-1.35207	6.21994	-10.3595	4.56157e-23	8.89967e-22	41.526
PPP1R14A	-1.03152	4.87595	-10.3591	4.57477e-23	8.91482e-22	41.5231
AKAP6	-0.562581	2.29201	-10.3564	4.68743e-23	9.12353e-22	41.4991
S1PR3	-0.951053	4.0519	-10.3548	4.74991e-23	9.23419e-22	41.486
AOC3	-1.17652	4.64002	-10.3529	4.83239e-23	9.38342e-22	41.469
CLIC2	-0.763391	4.12192	-10.3472	5.07925e-23	9.8511e-22	41.4199
MYO1G	-0.898338	3.5025	-10.3462	5.12345e-23	9.9251e-22	41.4113
UBE2E2	-1.11337	4.54992	-10.3277	6.01749e-23	1.16433e-21	41.2525
RAI2	-0.837791	3.58747	-10.3263	6.09087e-23	1.17714e-21	41.2406
PPM1K	-0.61917	3.4287	-10.3251	6.15716e-23	1.18855e-21	41.2299
SIGLEC7	-0.585116	2.42871	-10.3169	6.61128e-23	1.27471e-21	41.1597
HVCN1	-0.684453	3.51048	-10.3116	6.92424e-23	1.33349e-21	41.114
PCSK5	-0.731767	2.97235	-10.3018	7.53864e-23	1.45011e-21	41.0301
CLEC4E	-0.774406	2.60004	-10.2998	7.66874e-23	1.4734e-21	41.0132
MAP4K1	-0.939076	3.85855	-10.2976	7.81953e-23	1.50062e-21	40.994
KDF1	0.754364	5.42668	10.2894	8.39418e-23	1.60901e-21	40.924
CCIN	-0.289162	1.74985	-10.2848	8.74211e-23	1.67375e-21	40.8839
BGN	-1.35887	8.50498	-10.282	8.95617e-23	1.71274e-21	40.86
TMEM158	-1.10293	4.24187	-10.2805	9.07476e-23	1.7334e-21	40.8471
LRRC8C	-0.583749	3.46036	-10.2798	9.12288e-23	1.74056e-21	40.8418
GPR155	-0.636006	3.20828	-10.2795	9.15026e-23	1.74376e-21	40.8389
ACTB	-0.506599	12.997	-10.2715	9.80691e-23	1.86673e-21	40.7705
RASAL3	-0.888219	3.76499	-10.2669	1.02051e-22	1.94027e-21	40.7312
LAIR1	-0.904935	3.27788	-10.2664	1.02493e-22	1.94642e-21	40.7269
SLAMF1	-0.697511	2.48893	-10.2628	1.05817e-22	2.00722e-21	40.6954
RNASE2	-0.828598	2.83091	-10.257	1.11188e-22	2.10666e-21	40.6466
FXYD1	-0.558324	2.28084	-10.2508	1.17377e-22	2.22137e-21	40.5931
SIGLEC10	-0.968808	3.4201	-10.2488	1.19457e-22	2.25813e-21	40.5758
FOXP3	-0.706824	3.25418	-10.2431	1.25465e-22	2.36896e-21	40.5273
PDLIM5	-0.573908	5.09946	-10.2417	1.27005e-22	2.39528e-21	40.5153
NOVA1	-0.508462	2.05586	-10.2405	1.28313e-22	2.41717e-21	40.5052
CPNE5	-0.601922	2.9299	-10.24	1.2888e-22	2.42507e-21	40.5008
NXPH3	-0.707109	2.53777	-10.2358	1.33646e-22	2.51187e-21	40.465
PRICKLE2	-0.756206	3.91826	-10.2344	1.35311e-22	2.54026e-21	40.4528
HMCN1	-0.79435	3.20334	-10.2341	1.35594e-22	2.54265e-21	40.4507
NR2F6	0.616784	7.30601	10.2333	1.36547e-22	2.5576e-21	40.4438
ACOT9	-0.656296	5.24586	-10.2294	1.41313e-22	2.64287e-21	40.4099
CREB3L1	-1.11849	4.77722	-10.2293	1.41421e-22	2.64287e-21	40.4092
MYOCD	-0.825297	2.62958	-10.2267	1.44663e-22	2.70038e-21	40.3868
CNKSR1	0.73231	5.83944	10.2255	1.46063e-22	2.7234e-21	40.3773
KLHL13	-0.723744	2.70417	-10.2226	1.49811e-22	2.79013e-21	40.3523
NCF1	-0.762886	2.69369	-10.2193	1.54149e-22	2.86582e-21	40.3241
OSCAR	-0.813615	2.90969	-10.2193	1.54225e-22	2.86582e-21	40.3237
SAMD3	-0.437551	2.13715	-10.2185	1.55248e-22	2.88157e-21	40.3171
APBB1	-0.77817	3.46883	-10.2165	1.57909e-22	2.92766e-21	40.3004
P2RX7	-0.642947	2.72548	-10.2143	1.60931e-22	2.98031e-21	40.2816
CD300A	-0.828937	3.5757	-10.202	1.78966e-22	3.31056e-21	40.1768
IGDCC4	-0.572283	2.46612	-10.1947	1.90636e-22	3.52248e-21	40.1145
JAK3	-0.746288	4.02345	-10.193	1.93513e-22	3.57161e-21	40.0997
CD5	-0.882177	3.07623	-10.19	1.98594e-22	3.66126e-21	40.0741
THBS2	-1.70005	6.70867	-10.1851	2.07242e-22	3.81641e-21	40.0321
TM6SF1	-0.582928	3.00146	-10.1845	2.08296e-22	3.83152e-21	40.0271
GPR68	-0.829237	3.35082	-10.1785	2.19384e-22	4.03097e-21	39.9759
RNF112	-0.500228	2.35893	-10.1779	2.20525e-22	4.04741e-21	39.9708
REEP2	-0.815177	2.76701	-10.167	2.42162e-22	4.43955e-21	39.8784
TMTC1	-0.800455	3.0759	-10.1662	2.43945e-22	4.46724e-21	39.8712
IFITM1	-1.27651	7.76913	-10.1654	2.45487e-22	4.49047e-21	39.8649
SORBS3	-0.741519	5.09059	-10.1602	2.56784e-22	4.69188e-21	39.8205
PRSS35	-0.521889	2.081	-10.1586	2.60261e-22	4.75013e-21	39.8073
CD99L2	-0.672088	5.15059	-10.1567	2.647e-22	4.82578e-21	39.7906
ENPP1	-0.780252	2.99851	-10.1545	2.69789e-22	4.91309e-21	39.7718
CEBPD	-0.791591	7.02449	-10.1487	2.83586e-22	5.15862e-21	39.7226
GNGT2	-0.547184	2.5201	-10.1477	2.86002e-22	5.19681e-21	39.7142
CD80	-0.581584	2.46248	-10.1449	2.9296e-22	5.31735e-21	39.6905
PLEKHG2	-0.641189	4.39475	-10.1386	3.0938e-22	5.60918e-21	39.6367
PDGFRA	-1.02633	4.785	-10.1353	3.18225e-22	5.76318e-21	39.6089
POSTN	-1.87715	6.2403	-10.1312	3.29655e-22	5.96359e-21	39.574
SCARA5	-0.948279	2.67904	-10.1305	3.31528e-22	5.99088e-21	39.5684
FBLN2	-1.35133	5.12926	-10.1304	3.31975e-22	5.99235e-21	39.5671
ITGBL1	-0.968072	3.32045	-10.1286	3.36968e-22	6.07579e-21	39.5524
CCL8	-1.06752	3.28318	-10.1276	3.40019e-22	6.12407e-21	39.5435
RNF150	-0.799701	2.93785	-10.1149	3.7919e-22	6.8221e-21	39.4359
CD300E	-0.736064	2.39225	-10.1132	3.84743e-22	6.91441e-21	39.4216
DTNA	-0.734904	2.44762	-10.1095	3.9713e-22	7.12922e-21	39.3903
BDKRB2	-0.754799	3.28588	-10.1007	4.28444e-22	7.67791e-21	39.3154
FKBP10	-1.13497	6.07707	-10.1006	4.2863e-22	7.67791e-21	39.315
AFAP1	-0.736923	4.26764	-10.0995	4.32702e-22	7.74239e-21	39.3056
GLI1	-0.613673	2.36673	-10.0973	4.41074e-22	7.88361e-21	39.2867
TLR8	-0.609747	2.25661	-10.0964	4.44321e-22	7.93299e-21	39.2795
TRAT1	-0.665018	2.41108	-10.0962	4.45165e-22	7.93942e-21	39.2776
ACAP1	-0.860334	3.5762	-10.0855	4.87968e-22	8.69336e-21	39.187
SIGLEC9	-0.648446	2.76338	-10.0791	5.1559e-22	9.17549e-21	39.1327
LILRA1	-0.28608	1.87589	-10.0777	5.21853e-22	9.27129e-21	39.1208
ADH1B	-1.2906	3.1429	-10.0776	5.22103e-22	9.27129e-21	39.1203
ST8SIA4	-0.661984	3.26443	-10.0743	5.37105e-22	9.52737e-21	39.0924
LILRB5	-0.650265	2.43513	-10.0718	5.48756e-22	9.72354e-21	39.0712
RFTN1	-0.831436	5.49112	-10.0703	5.5607e-22	9.8425e-21	39.0581
ITGAL	-1.01845	3.89126	-10.0651	5.81119e-22	1.02748e-20	39.0147
ALDH1A1	-1.58515	4.94299	-10.0627	5.93441e-22	1.04813e-20	38.994
LRRC25	-0.78821	3.0066	-10.0622	5.95968e-22	1.05147e-20	38.9898
SH2D1A	-0.785089	2.77971	-10.0554	6.3157e-22	1.11308e-20	38.9325
SLC16A1	-1.12542	4.534	-10.0537	6.41014e-22	1.12851e-20	38.9179
VCAN	-1.41651	6.31877	-10.0488	6.67995e-22	1.17476e-20	38.8772
SLC7A7	-0.968186	4.14537	-10.0407	7.16016e-22	1.25697e-20	38.8087
ZFHX4	-0.762553	2.75841	-10.0407	7.16275e-22	1.25697e-20	38.8084
PTGS2	-1.40942	5.41309	-10.0357	7.47364e-22	1.31012e-20	38.7664
CNTNAP1	-0.683707	4.06751	-10.0297	7.86623e-22	1.37747e-20	38.7159
SETBP1	-0.850894	4.15259	-10.0241	8.25246e-22	1.44356e-20	38.6686
IKZF1	-0.732851	2.64568	-10.0239	8.26261e-22	1.4438e-20	38.6674
GHR	-0.724651	2.68756	-10.0181	8.68394e-22	1.51581e-20	38.6184
CD38	-0.944132	3.04878	-10.017	8.76727e-22	1.52873e-20	38.6089
NES	-0.900297	5.11723	-10.0148	8.93697e-22	1.55666e-20	38.59
PRRX2	-0.945986	3.59008	-10.0131	9.06481e-22	1.57726e-20	38.576
MAPK12	-0.646747	2.8493	-10.0088	9.40632e-22	1.63495e-20	38.5395
INMT	-0.842332	3.41579	-10.0078	9.48022e-22	1.64605e-20	38.5318
MYOM1	-0.878511	3.333	-10.0064	9.59886e-22	1.66488e-20	38.5195
JAK2	-0.692595	4.33702	-10.0052	9.69268e-22	1.67938e-20	38.5099
ADARB1	-0.770858	3.91295	-10.0032	9.86356e-22	1.70719e-20	38.4927
MFAP5	-1.25358	2.86845	-9.99468	1.06061e-21	1.83377e-20	38.4211
TDRD10	-0.414069	2.07749	-9.99277	1.07804e-21	1.86194e-20	38.405
CAV2	-0.906442	4.78545	-9.99044	1.09958e-21	1.89715e-20	38.3855
WDFY4	-0.757849	3.00871	-9.98399	1.16171e-21	2.00223e-20	38.3313
CD226	-0.404276	2.16803	-9.98216	1.17994e-21	2.03152e-20	38.3159
PMP22	-1.25147	6.14806	-9.97641	1.23912e-21	2.13118e-20	38.2676
BCAT2	0.853538	7.24106	9.97597	1.24384e-21	2.13706e-20	38.2639
HTR2A	-0.417956	2.11494	-9.97239	1.28233e-21	2.19922e-20	38.2338
NPAS4	-0.451541	1.8481	-9.97235	1.2827e-21	2.19922e-20	38.2335
CSPG4	-0.956105	4.44455	-9.97188	1.28785e-21	2.20575e-20	38.2296
PCDH7	-1.10653	3.45443	-9.96584	1.3558e-21	2.31971e-20	38.1789
APBB2	-0.520291	4.06318	-9.96538	1.36103e-21	2.3253e-20	38.1751
SLAMF8	-1.03397	3.61111	-9.96531	1.36191e-21	2.3253e-20	38.1744
FOSL1	-0.923532	4.5221	-9.95676	1.46457e-21	2.49798e-20	38.1028
RCN3	-1.06941	5.35359	-9.94711	1.58976e-21	2.7087e-20	38.0218
FPR2	-0.640869	2.38159	-9.93829	1.71335e-21	2.91454e-20	37.948
IRAK3	-0.76808	3.42657	-9.93824	1.71412e-21	2.91454e-20	37.9475
TGFBR1	-0.635224	5.21088	-9.93078	1.82612e-21	3.10176e-20	37.8851
NLRC5	-0.857756	4.2927	-9.9277	1.87458e-21	3.18078e-20	37.8593
PYGM	-0.71316	2.89949	-9.91845	2.02749e-21	3.43668e-20	37.7819
DZIP1	-0.737477	3.39614	-9.91607	2.06882e-21	3.50311e-20	37.762
FMNL2	-0.792958	4.51217	-9.91574	2.07471e-21	3.50947e-20	37.7592
CD1D	-0.577728	2.65441	-9.91488	2.08979e-21	3.53134e-20	37.7521
RCAN2	-0.8152	3.83827	-9.90832	2.20925e-21	3.72873e-20	37.6972
ELN	-1.13388	4.95078	-9.90822	2.21115e-21	3.72873e-20	37.6964
GFRA2	-0.463298	2.16244	-9.90523	2.26793e-21	3.82055e-20	37.6714
ABCB4	-0.482233	2.61546	-9.90213	2.32823e-21	3.91811e-20	37.6455
ECM1	-0.897855	5.39914	-9.90157	2.33925e-21	3.93263e-20	37.6408
AARD	-0.57744	2.08291	-9.9009	2.35255e-21	3.95094e-20	37.6353
TLDC2	-0.437926	2.22126	-9.89967	2.37723e-21	3.9883e-20	37.625
SLC11A1	-0.777449	3.07983	-9.8975	2.42125e-21	4.05801e-20	37.6069
PGR	-0.223331	1.79958	-9.89691	2.43341e-21	4.07422e-20	37.6019
RIN3	-0.589974	4.27359	-9.89626	2.44674e-21	4.09237e-20	37.5965
PRDM6	-0.628015	2.50989	-9.89065	2.56588e-21	4.28367e-20	37.5496
LAX1	-0.713663	2.62163	-9.89063	2.56634e-21	4.28367e-20	37.5495
PHLDB1	-0.656405	4.36925	-9.88908	2.60025e-21	4.33586e-20	37.5365
TLR6	-0.607742	2.62544	-9.8885	2.61287e-21	4.35248e-20	37.5317
SAMHD1	-0.817686	6.31378	-9.88753	2.63451e-21	4.38409e-20	37.5236
AKAP12	-1.04756	4.22791	-9.8858	2.67325e-21	4.44404e-20	37.5092
IGFBP6	-1.25146	5.5236	-9.88108	2.78228e-21	4.62061e-20	37.4698
ST6GALNAC6	-0.582027	4.8064	-9.87774	2.86187e-21	4.74799e-20	37.442
ACVR1	-0.601941	5.97939	-9.87648	2.8925e-21	4.79396e-20	37.4315
KCNA5	-0.525568	2.08893	-9.87485	2.93278e-21	4.85581e-20	37.4178
MCTP1	-0.606021	2.85875	-9.86501	3.18707e-21	5.27151e-20	37.3358
ZMYND15	-0.61353	3.12582	-9.86456	3.19905e-21	5.286e-20	37.3321
CDK6	-0.852202	3.50568	-9.8603	3.31618e-21	5.47403e-20	37.2966
ADAMTS5	-0.567165	2.60776	-9.85949	3.33897e-21	5.50611e-20	37.2899
HEYL	-0.794457	4.05629	-9.8438	3.81173e-21	6.2794e-20	37.1593
DKK3	-0.892188	5.43357	-9.84239	3.85748e-21	6.34839e-20	37.1475
IRF4	-0.688891	2.56566	-9.84209	3.86715e-21	6.35794e-20	37.145
LY9	-0.60574	2.34989	-9.84075	3.91109e-21	6.42374e-20	37.1339
RASGRF2	-0.54578	3.02894	-9.8397	3.94604e-21	6.47466e-20	37.1251
PPP3CC	-0.534717	5.18686	-9.83931	3.95902e-21	6.48946e-20	37.1219
LSAMP	-0.700714	2.90184	-9.83907	3.96681e-21	6.49575e-20	37.1199
SPOCK2	-0.928447	4.27964	-9.8377	4.01287e-21	6.56463e-20	37.1086
TNFRSF1B	-0.931502	5.51949	-9.83587	4.07537e-21	6.66023e-20	37.0933
TNFRSF8	-0.453671	2.15316	-9.82739	4.37747e-21	7.14681e-20	37.0228
SERPINA3	-0.936425	3.07063	-9.82421	4.49615e-21	7.33329e-20	36.9964
NFATC2	-0.600397	3.12572	-9.823	4.5424e-21	7.40136e-20	36.9863
PTGDR	-0.311309	1.84392	-9.81226	4.97236e-21	8.09389e-20	36.8971
CCDC102B	-0.514199	3.37675	-9.80936	5.09495e-21	8.28522e-20	36.8731
ELK3	-0.589046	5.36507	-9.8078	5.16238e-21	8.38657e-20	36.8601
RARB	-0.749647	3.06364	-9.80327	5.36309e-21	8.70402e-20	36.8225
JDP2	-0.703921	4.1218	-9.80169	5.43455e-21	8.81128e-20	36.8095
RGMA	-0.699755	2.48538	-9.80077	5.47674e-21	8.86478e-20	36.8019
COL13A1	-0.607192	2.87482	-9.80074	5.47836e-21	8.86478e-20	36.8016
IFI30	-0.76385	4.92163	-9.79111	5.9402e-21	9.60263e-20	36.7217
LBH	-0.791759	5.41571	-9.79036	5.97803e-21	9.65428e-20	36.7155
SYDE1	-0.70357	3.94173	-9.7899	6.00077e-21	9.68148e-20	36.7117
ST6GAL1	-0.989296	4.15825	-9.78917	6.03774e-21	9.72608e-20	36.7057
PTGER3	-0.557475	2.11968	-9.78912	6.04027e-21	9.72608e-20	36.7053
ABCD2	-0.382722	2.02181	-9.78812	6.09126e-21	9.79856e-20	36.697
IGFN1	-0.686649	2.20478	-9.78538	6.23325e-21	1.00171e-19	36.6743
FBXO17	-0.760449	2.71494	-9.78459	6.27482e-21	1.00741e-19	36.6677
IL1RL1	-0.59255	2.20575	-9.78227	6.39844e-21	1.02625e-19	36.6485
GPR176	-0.703883	3.11122	-9.77851	6.60373e-21	1.05814e-19	36.6173
TMEM176A	-1.12731	5.37783	-9.77579	6.75626e-21	1.08153e-19	36.5948
PYHIN1	-0.625001	2.37465	-9.77257	6.94124e-21	1.11006e-19	36.5682
MMRN1	-0.835069	2.71795	-9.77244	6.94854e-21	1.11014e-19	36.5671
GLTP	0.669867	8.13057	9.77229	6.9572e-21	1.11044e-19	36.5659
HSPG2	-0.781158	5.69888	-9.77134	7.01336e-21	1.11832e-19	36.558
KLF12	-0.65232	2.94247	-9.76862	7.1752e-21	1.14302e-19	36.5355
TNFRSF4	-0.608465	3.1044	-9.76724	7.25886e-21	1.15522e-19	36.524
SUGCT	-0.842353	3.21948	-9.7653	7.37797e-21	1.17304e-19	36.508
ZAP70	-0.806134	3.08821	-9.75978	7.7275e-21	1.22742e-19	36.4623
SVIL	-0.841058	6.20664	-9.74827	8.51002e-21	1.35041e-19	36.3672
KCNA3	-0.420227	2.07231	-9.74776	8.54656e-21	1.3549e-19	36.363
CD4	-0.924469	4.85406	-9.73696	9.35595e-21	1.48178e-19	36.2738
LILRA6	-0.541393	2.38887	-9.73227	9.73076e-21	1.53966e-19	36.2351
COPS8	-0.423955	5.42461	-9.73151	9.79226e-21	1.54789e-19	36.2288
ZNF385D	-0.485656	2.08482	-9.73036	9.88746e-21	1.56144e-19	36.2193
HDAC4	-0.506617	3.69887	-9.72137	1.06592e-20	1.68169e-19	36.1452
TCF21	-0.839651	3.34585	-9.72063	1.0726e-20	1.69061e-19	36.139
DNASE1L3	-0.738545	2.66991	-9.71776	1.09862e-20	1.72996e-19	36.1154
DEGS1	-0.903016	6.36018	-9.71415	1.13225e-20	1.78121e-19	36.0857
CAMSAP3	0.800509	5.42803	9.71269	1.14616e-20	1.80136e-19	36.0736
DOK6	-0.525167	2.16321	-9.70988	1.1734e-20	1.84241e-19	36.0505
PJA2	-0.613789	6.84969	-9.70944	1.17778e-20	1.84752e-19	36.0468
TRAM2	-0.642897	4.7414	-9.7073	1.199e-20	1.87901e-19	36.0292
GZMB	-1.34888	4.25042	-9.70576	1.21456e-20	1.90158e-19	36.0165
SLC35G2	-0.703439	3.12376	-9.70513	1.22092e-20	1.90971e-19	36.0113
ZNF831	-0.389541	1.8644	-9.70475	1.22477e-20	1.91391e-19	36.0082
MYCL	1.27588	6.13012	9.70307	1.24212e-20	1.93917e-19	35.9944
ILK	-0.646074	5.64026	-9.70195	1.2538e-20	1.95555e-19	35.9851
DUSP8	-0.702756	3.41911	-9.69797	1.29621e-20	2.01977e-19	35.9523
GATA5	-0.758767	2.14802	-9.69693	1.30743e-20	2.03533e-19	35.9438
EDN1	-1.03104	4.80176	-9.69544	1.3238e-20	2.05886e-19	35.9316
WNT5B	-0.957302	3.35707	-9.69256	1.35605e-20	2.10701e-19	35.9078
TGFBR2	-0.774781	6.53063	-9.68545	1.43893e-20	2.23368e-19	35.8493
CMA1	-0.862081	2.42532	-9.68382	1.45867e-20	2.26219e-19	35.8359
CD52	-1.13932	5.47835	-9.68345	1.4632e-20	2.26705e-19	35.8328
MILR1	-0.739497	2.90795	-9.6795	1.51216e-20	2.34071e-19	35.8004
PGM2L1	-0.739663	3.77731	-9.67924	1.5155e-20	2.34366e-19	35.7982
FMO2	-0.560958	2.09511	-9.67496	1.57054e-20	2.4265e-19	35.763
ADAMTS14	-0.803087	3.18355	-9.67339	1.5912e-20	2.45611e-19	35.7502
HLA-DPB1	-1.23484	6.59004	-9.67244	1.60379e-20	2.47321e-19	35.7424
ADCY5	-0.859417	2.86382	-9.66675	1.68174e-20	2.59099e-19	35.6956
CD27	-1.01945	3.68936	-9.66648	1.68554e-20	2.5944e-19	35.6934
GLIS2	-0.810736	4.16973	-9.6649	1.7078e-20	2.62621e-19	35.6804
CACNB2	-0.662161	2.69454	-9.66408	1.71951e-20	2.64173e-19	35.6737
LAPTM5	-1.1649	7.06739	-9.65864	1.79929e-20	2.76172e-19	35.629
OSR2	-0.916663	3.49612	-9.6583	1.8044e-20	2.76697e-19	35.6262
RYR2	-0.687907	2.63772	-9.65411	1.86846e-20	2.86253e-19	35.5918
ANPEP	-1.17484	4.2019	-9.65044	1.92635e-20	2.94846e-19	35.5617
FAM126A	-0.598265	3.40699	-9.64827	1.96138e-20	2.99928e-19	35.5439
SFMBT2	-0.724124	3.29477	-9.64811	1.96413e-20	3.00069e-19	35.5426
IL15	-0.482027	2.59008	-9.64281	2.05266e-20	3.13303e-19	35.4991
RBP1	-1.09428	4.82462	-9.64092	2.08516e-20	3.17967e-19	35.4836
PLAC9	-0.968953	3.87452	-9.63695	2.15504e-20	3.28318e-19	35.4511
CHST11	-1.01494	4.302	-9.63459	2.19786e-20	3.34531e-19	35.4317
TSPAN18	-0.875943	3.57819	-9.63302	2.22669e-20	3.38605e-19	35.4189
PRAM1	-0.54139	2.66544	-9.63179	2.24945e-20	3.4175e-19	35.4088
PLCD4	-0.569222	2.5089	-9.63	2.28329e-20	3.46569e-19	35.3941
RASSF4	-0.802205	3.92619	-9.62058	2.46915e-20	3.74434e-19	35.317
CCL24	-0.809742	2.58672	-9.62002	2.48058e-20	3.75821e-19	35.3124
THBS4	-1.1557	3.01951	-9.61741	2.53502e-20	3.83714e-19	35.291
LILRA2	-0.301315	1.89006	-9.61461	2.5945e-20	3.92355e-19	35.2682
TNFAIP8L2	-0.76659	3.2465	-9.6129	2.63156e-20	3.97594e-19	35.2542
PRSS23	-0.839739	5.38258	-9.60713	2.76072e-20	4.16723e-19	35.2069
KLHL6	-0.68395	2.80301	-9.60376	2.83903e-20	4.28151e-19	35.1794
FHL3	-0.64787	5.17626	-9.60256	2.8675e-20	4.32047e-19	35.1695
MAPK11	-0.618195	3.718	-9.60162	2.88975e-20	4.35001e-19	35.1619
LDLR	-0.964603	5.65723	-9.60025	2.92274e-20	4.39563e-19	35.1507
PSTPIP1	-0.760742	3.25329	-9.59944	2.94259e-20	4.42143e-19	35.144
TACR2	-0.796374	2.41523	-9.59901	2.95314e-20	4.43323e-19	35.1405
BCL2	-0.588879	2.99636	-9.59542	3.04225e-20	4.56282e-19	35.1112
KIAA1522	0.696733	7.34869	9.59266	3.11265e-20	4.66414e-19	35.0887
SCN2B	-0.240589	1.69053	-9.5925	3.11671e-20	4.66596e-19	35.0874
C8orf88	-0.882855	3.19331	-9.58842	3.22398e-20	4.82216e-19	35.054
SHANK3	-0.631347	4.98741	-9.58076	3.43502e-20	5.13313e-19	34.9915
TRAF3IP3	-0.68708	2.87251	-9.57865	3.49563e-20	5.21895e-19	34.9743
TMEM200A	-0.755162	2.88026	-9.57771	3.52309e-20	5.25517e-19	34.9666
PTPN7	-0.77399	2.92659	-9.57528	3.59445e-20	5.35674e-19	34.9468
CD6	-0.879594	3.20026	-9.57445	3.61948e-20	5.38914e-19	34.94
COL23A1	-0.494892	2.22322	-9.57086	3.72848e-20	5.54641e-19	34.9107
CD8A	-1.06113	3.6096	-9.56986	3.75956e-20	5.58758e-19	34.9025
ABI3	-0.704806	3.89377	-9.5689	3.78941e-20	5.62685e-19	34.8947
LRFN5	-0.562393	2.1004	-9.56038	4.06601e-20	6.0321e-19	34.8253
PCP4	-1.89804	3.95708	-9.55889	4.11643e-20	6.10139e-19	34.8131
RRAS	-0.818555	6.79871	-9.55732	4.17013e-20	6.1754e-19	34.8004
IL11	-0.926177	2.82967	-9.55259	4.33656e-20	6.41607e-19	34.7618
CD3E	-1.09439	4.68316	-9.54946	4.45016e-20	6.57822e-19	34.7363
GBP1	-1.05305	6.17958	-9.54603	4.57796e-20	6.76104e-19	34.7084
BHLHE40	-0.897668	8.35443	-9.5448	4.62495e-20	6.82429e-19	34.6983
IL24	-0.795225	2.7957	-9.54143	4.75549e-20	7.01062e-19	34.6709
AHNAK2	-1.30527	4.17839	-9.54128	4.76127e-20	7.01283e-19	34.6697
VIT	-0.618062	1.96711	-9.54103	4.7712e-20	7.02115e-19	34.6676
ODF3L1	-0.409091	2.01962	-9.54008	4.80847e-20	7.06965e-19	34.66
TUB	-0.650986	2.7782	-9.5387	4.8636e-20	7.14431e-19	34.6487
TSPAN11	-0.594209	2.66624	-9.53425	5.04568e-20	7.40515e-19	34.6125
LTBP1	-0.744275	5.81258	-9.52907	5.26601e-20	7.72159e-19	34.5704
ST8SIA1	-0.445734	2.06035	-9.52639	5.38359e-20	7.88696e-19	34.5486
HS3ST3A1	-0.621589	2.07405	-9.52257	5.55615e-20	8.13249e-19	34.5175
PLP1	-0.635584	2.30182	-9.52246	5.5611e-20	8.13249e-19	34.5166
TMC4	0.900438	6.17196	9.52228	5.56922e-20	8.13711e-19	34.5152
ITGB3	-0.695734	3.37041	-9.51686	5.82371e-20	8.50138e-19	34.4711
TRPC4	-0.431867	2.4293	-9.51585	5.87266e-20	8.56521e-19	34.4629
KCNB1	-0.382106	1.78252	-9.51559	5.88502e-20	8.57561e-19	34.4608
DIRAS3	-0.584511	2.3996	-9.50846	6.24138e-20	9.08683e-19	34.4029
ADAP2	-0.731485	4.50257	-9.50771	6.28012e-20	9.13513e-19	34.3968
ADAMDEC1	-1.07714	3.29277	-9.50324	6.51541e-20	9.46899e-19	34.3605
STAP1	-0.635338	2.18755	-9.49634	6.89595e-20	1.00132e-18	34.3046
GALNT18	-0.649049	3.93556	-9.48888	7.33245e-20	1.06376e-18	34.2441
LEF1	-0.698606	3.44074	-9.48819	7.37472e-20	1.06894e-18	34.2384
MYOT	-0.414436	2.04951	-9.48359	7.65891e-20	1.10916e-18	34.2012
CRB3	0.818038	5.33868	9.48143	7.79582e-20	1.12799e-18	34.1837
MAP3K3	-0.504871	4.61122	-9.4763	8.13179e-20	1.17556e-18	34.1421
SORCS1	-0.332334	1.87055	-9.47078	8.50907e-20	1.22902e-18	34.0974
STAP2	0.753238	6.99442	9.46796	8.70873e-20	1.25675e-18	34.0746
CYP2J2	1.23714	5.90444	9.46714	8.76718e-20	1.26408e-18	34.068
C16orf89	-0.709191	2.42183	-9.46655	8.80949e-20	1.26906e-18	34.0632
GYPE	-0.231861	1.75651	-9.46554	8.88324e-20	1.27856e-18	34.055
PLK2	-0.771843	5.55297	-9.45458	9.71968e-20	1.39773e-18	33.9663
TNFRSF9	-0.67308	3.09436	-9.45165	9.95572e-20	1.43042e-18	33.9427
CHST7	-0.542882	3.19391	-9.45045	1.00542e-19	1.44331e-18	33.933
C3	-1.52452	7.48992	-9.43691	1.12346e-19	1.61134e-18	33.8236
ZFP36L1	-0.715436	8.21864	-9.43289	1.16112e-19	1.6639e-18	33.7911
MMP9	-1.6091	5.26415	-9.42677	1.22073e-19	1.7478e-18	33.7418
GRAP2	-0.425682	2.16542	-9.42564	1.23211e-19	1.76255e-18	33.7326
IL18R1	-0.649125	3.15485	-9.41686	1.32393e-19	1.89225e-18	33.6618
PRDM8	-0.739572	2.83992	-9.41549	1.33884e-19	1.9119e-18	33.6507
MATK	-0.637608	2.59207	-9.39873	1.53548e-19	2.1908e-18	33.5157
NFIA	-0.754151	4.63603	-9.39856	1.53761e-19	2.19194e-18	33.5143
MYCT1	-0.586727	3.38339	-9.39354	1.60199e-19	2.28172e-18	33.4739
ADRB3	-0.456847	1.87172	-9.39246	1.61613e-19	2.29986e-18	33.4653
RAB15	0.872962	6.44531	9.38864	1.66733e-19	2.37067e-18	33.4345
NLRC3	-0.523233	2.4873	-9.3885	1.66932e-19	2.37145e-18	33.4333
HLA-DMB	-1.11377	5.41294	-9.3858	1.7065e-19	2.42216e-18	33.4116
SLC43A1	-0.715453	3.87679	-9.37899	1.80399e-19	2.55833e-18	33.3569
FZD8	-0.591361	2.87496	-9.37333	1.88919e-19	2.67684e-18	33.3114
CD7	-0.990495	3.53385	-9.37251	1.90197e-19	2.69262e-18	33.3048
CLEC4D	-0.324995	1.854	-9.37173	1.91405e-19	2.70739e-18	33.2985
SYNPO	-0.651391	4.85057	-9.37059	1.93197e-19	2.73038e-18	33.2894
CCL13	-1.15077	3.7718	-9.3702	1.93804e-19	2.7366e-18	33.2863
GIMAP7	-0.84698	5.12516	-9.36887	1.95917e-19	2.76406e-18	33.2756
SGCE	-1.04075	4.78659	-9.36615	2.00308e-19	2.82359e-18	33.2537
UBASH3A	-0.537778	2.29662	-9.36515	2.0195e-19	2.84428e-18	33.2457
ARSB	-0.472297	3.89434	-9.36192	2.07337e-19	2.91766e-18	33.2198
EPN3	0.987409	5.94761	9.36128	2.08427e-19	2.93049e-18	33.2146
COL5A3	-0.862808	4.06035	-9.35525	2.18913e-19	3.07527e-18	33.1662
CR1	-0.608003	2.65929	-9.35407	2.21025e-19	3.10229e-18	33.1568
PTX3	-1.01872	3.06308	-9.35343	2.22181e-19	3.11585e-18	33.1516
CDON	-0.66761	2.84286	-9.35023	2.28045e-19	3.19536e-18	33.126
KCNN3	-0.453199	2.61365	-9.34643	2.35217e-19	3.29304e-18	33.0955
HIPK3	-0.49949	5.54646	-9.34302	2.41839e-19	3.38286e-18	33.0681
RANBP3L	-0.694574	2.18408	-9.33927	2.49326e-19	3.48461e-18	33.0381
TRAK1	0.747438	6.77524	9.33797	2.51969e-19	3.51856e-18	33.0277
ZBTB32	-0.390334	2.16659	-9.33669	2.54621e-19	3.55257e-18	33.0174
PRF1	-1.04648	3.70501	-9.33511	2.57909e-19	3.59539e-18	33.0047
NCAM2	-0.500853	2.00329	-9.33161	2.65359e-19	3.6961e-18	32.9767
FAM174B	1.09186	6.73644	9.33066	2.67418e-19	3.72163e-18	32.969
CCL26	-0.556997	2.30062	-9.33043	2.67919e-19	3.72543e-18	32.9672
IL12RB1	-0.689479	2.66937	-9.33021	2.68388e-19	3.7288e-18	32.9655
ARHGAP22	-0.500959	2.61736	-9.32882	2.71442e-19	3.76804e-18	32.9543
RAB33A	-0.583341	2.96729	-9.32497	2.80069e-19	3.88451e-18	32.9235
SBSPON	-1.04512	3.57881	-9.32302	2.84545e-19	3.94325e-18	32.9079
PTH1R	-0.674342	2.85718	-9.31761	2.97315e-19	4.11674e-18	32.8646
ACKR3	-1.00154	6.40705	-9.31032	3.15459e-19	4.36429e-18	32.8063
CD34	-0.582988	4.60651	-9.31019	3.15798e-19	4.3653e-18	32.8052
RGS13	-0.461266	1.9873	-9.30679	3.2462e-19	4.48347e-18	32.7781
DENND3	-0.531953	3.57397	-9.30558	3.27821e-19	4.52387e-18	32.7684
CSMD2	-0.404822	2.09084	-9.30333	3.33865e-19	4.60341e-18	32.7504
TMA7	0.434038	8.86561	9.30307	3.34578e-19	4.60937e-18	32.7483
FSTL3	-1.03514	4.91477	-9.30163	3.38515e-19	4.65969e-18	32.7368
SLFN11	-1.02078	4.59941	-9.28774	3.78842e-19	5.21043e-18	32.6259
ISG20	-0.80341	4.05508	-9.28544	3.85976e-19	5.30409e-18	32.6075
HLA-DPA1	-1.35892	7.11157	-9.27761	4.11234e-19	5.64647e-18	32.5451
KITLG	-0.824632	3.67492	-9.272	4.30338e-19	5.90383e-18	32.5003
FMNL3	-0.512528	3.77454	-9.27144	4.32314e-19	5.92599e-18	32.4958
ZNF532	-0.652679	4.8997	-9.26367	4.60348e-19	6.30499e-18	32.4339
CCR5	-0.760192	2.90305	-9.26304	4.62707e-19	6.33202e-18	32.4289
ZNF823	0.685558	5.29159	9.26124	4.69492e-19	6.41952e-18	32.4146
CPNE8	-0.789967	3.582	-9.25793	4.82243e-19	6.58838e-18	32.3882
TPSD1	-0.76616	2.48699	-9.25632	4.88539e-19	6.66884e-18	32.3754
TIMP1	-0.95543	9.50414	-9.25468	4.9508e-19	6.75251e-18	32.3623
GBP5	-1.15874	3.68184	-9.25258	5.03529e-19	6.86205e-18	32.3456
CALU	-0.708527	7.09826	-9.24777	5.23515e-19	7.12849e-18	32.3073
VSIG2	1.59872	7.96835	9.24502	5.35241e-19	7.28212e-18	32.2854
PRDM5	-0.408216	2.30986	-9.23426	5.83855e-19	7.93694e-18	32.1998
LRP1	-0.778433	6.31668	-9.23335	5.88117e-19	7.98826e-18	32.1926
CLDN5	-0.795288	3.74409	-9.23216	5.93822e-19	8.05467e-18	32.1831
CEBPB	-0.75499	7.43455	-9.23212	5.93988e-19	8.05467e-18	32.1829
CALCRL	-0.644227	3.72635	-9.22865	6.10871e-19	8.27677e-18	32.1552
SLC24A3	-0.961536	3.96838	-9.22849	6.11672e-19	8.28079e-18	32.154
REEP1	-0.813935	2.61446	-9.22835	6.12348e-19	8.28311e-18	32.1529
HS3ST3B1	-0.521374	2.15596	-9.21993	6.5539e-19	8.85802e-18	32.086
EVPL	1.06616	7.56761	9.213	6.93017e-19	9.35887e-18	32.031
CYTL1	-0.773142	2.84783	-9.2092	7.14565e-19	9.64193e-18	32.0008
LGALS1	-1.05372	9.26579	-9.20723	7.26012e-19	9.78834e-18	31.9852
FHL5	-0.539296	2.469	-9.20034	7.67376e-19	1.03375e-17	31.9306
COL8A1	-1.13042	4.92415	-9.19558	7.97399e-19	1.07332e-17	31.8928
SELP	-0.929706	3.46549	-9.19523	7.99591e-19	1.07538e-17	31.8901
EBF2	-0.373395	1.98119	-9.19388	8.08358e-19	1.08628e-17	31.8793
PHYHIP	-0.687254	2.49424	-9.18974	8.35734e-19	1.12215e-17	31.8465
RAB37	-0.500087	2.34584	-9.18865	8.43082e-19	1.13109e-17	31.8379
COL12A1	-1.12895	6.22736	-9.18787	8.48385e-19	1.13728e-17	31.8317
RAB11FIP4	0.725301	4.71461	9.18691	8.54973e-19	1.14517e-17	31.8241
TMEM106A	-0.593021	2.84679	-9.18076	8.9827e-19	1.20219e-17	31.7755
ZBP1	-0.785607	2.83522	-9.18044	9.00635e-19	1.20437e-17	31.7729
CCL11	-1.33125	4.50465	-9.17433	9.45918e-19	1.26389e-17	31.7245
ABCB5	-0.20893	1.66145	-9.16503	1.01927e-18	1.36079e-17	31.651
SNCA	-0.786715	3.18954	-9.16378	1.02953e-18	1.37337e-17	31.6411
DPP4	-0.911307	3.25747	-9.16154	1.04824e-18	1.3972e-17	31.6234
RSPO1	-0.324706	1.82627	-9.15983	1.06274e-18	1.41538e-17	31.6099
IGSF6	-0.820259	4.42234	-9.1589	1.07064e-18	1.42474e-17	31.6026
FBXL22	-0.539648	2.53644	-9.15389	1.11462e-18	1.48206e-17	31.5629
LILRB1	-0.646971	2.56803	-9.15247	1.12734e-18	1.49776e-17	31.5517
GGT6	1.26818	5.97309	9.15051	1.14522e-18	1.52029e-17	31.5362
TYMP	-1.09958	6.22177	-9.1473	1.17501e-18	1.55858e-17	31.511
PER2	-0.573315	4.54403	-9.1466	1.18168e-18	1.56616e-17	31.5054
PILRA	-0.791283	3.79345	-9.14404	1.20615e-18	1.5973e-17	31.4852
TMEM71	-0.588663	2.68538	-9.14296	1.21666e-18	1.60992e-17	31.4766
NTN1	-0.849027	2.70119	-9.13974	1.24845e-18	1.65064e-17	31.4512
NFIC	-0.575894	5.05368	-9.13528	1.29387e-18	1.70932e-17	31.4161
IDO1	-1.32443	3.95083	-9.13159	1.33265e-18	1.75914e-17	31.387
STXBP1	-0.747722	3.90973	-9.13077	1.34148e-18	1.76937e-17	31.3805
SCG2	-0.911631	2.74665	-9.12758	1.37609e-18	1.81356e-17	31.3554
GLIS1	-0.486779	2.17364	-9.12027	1.45905e-18	1.92135e-17	31.2977
ELANE	-0.311021	1.81221	-9.11937	1.46959e-18	1.93369e-17	31.2906
ITIH5	-0.816421	3.6387	-9.11904	1.47342e-18	1.93664e-17	31.2881
MEOX1	-0.581899	2.38269	-9.11898	1.4742e-18	1.93664e-17	31.2876
CSF2RB	-0.87668	3.87761	-9.11877	1.47662e-18	1.93828e-17	31.2859
MSX1	-0.798444	3.51044	-9.1183	1.48215e-18	1.94397e-17	31.2823
LDLRAD4	-0.523179	2.69733	-9.11604	1.50929e-18	1.978e-17	31.2644
CPE	-1.02654	5.32411	-9.09753	1.7499e-18	2.29148e-17	31.1187
TIGIT	-0.711798	2.91782	-9.09723	1.75409e-18	2.29515e-17	31.1164
CXCL3	-0.865898	2.79817	-9.097	1.75732e-18	2.29754e-17	31.1146
STAT3	-0.532152	6.86722	-9.09255	1.82081e-18	2.37864e-17	31.0796
ITPR1	-0.73939	4.55374	-9.09197	1.82925e-18	2.38778e-17	31.0751
PLA2G2F	1.67766	5.31761	9.09048	1.85117e-18	2.41446e-17	31.0633
ADRA2A	-0.754171	3.18802	-9.08325	1.9611e-18	2.55582e-17	31.0065
ADAMTS16	-0.735047	2.59881	-9.08066	2.00196e-18	2.607e-17	30.9862
CAP2	-0.825313	4.32683	-9.08017	2.00976e-18	2.61508e-17	30.9824
VASN	-0.864618	4.96789	-9.07979	2.0159e-18	2.62099e-17	30.9794
BACH2	-0.487148	2.19405	-9.07548	2.08649e-18	2.71062e-17	30.9455
GDF10	-0.247879	1.65482	-9.07498	2.09478e-18	2.71923e-17	30.9416
MAP7D3	-0.582522	3.2675	-9.07391	2.11269e-18	2.74031e-17	30.9332
OSBPL6	-0.409711	2.03801	-9.06875	2.20142e-18	2.85315e-17	30.8927
OXSM	0.376948	4.77831	9.06637	2.24344e-18	2.90531e-17	30.8741
NFAM1	-0.723093	2.95847	-9.06465	2.27441e-18	2.9431e-17	30.8606
IL12B	-0.24471	1.77836	-9.06075	2.34612e-18	3.03351e-17	30.83
CD300LF	-0.618071	2.70874	-9.05476	2.46073e-18	3.17919e-17	30.783
COL4A1	-0.883614	8.37121	-9.05388	2.47812e-18	3.19913e-17	30.7761
NTRK2	-0.7665	2.36332	-9.05072	2.54113e-18	3.2779e-17	30.7514
KLRG1	-0.475103	2.50756	-9.05014	2.55288e-18	3.29046e-17	30.7469
CAMK1	-0.599736	3.7691	-9.04954	2.56513e-18	3.30366e-17	30.7421
SLC18A2	-0.414272	2.12054	-9.04918	2.57252e-18	3.31058e-17	30.7393
NT5DC3	-0.616679	3.61331	-9.04858	2.58485e-18	3.32385e-17	30.7346
RNF130	-0.689024	5.19426	-9.04835	2.58964e-18	3.32739e-17	30.7328
DCUN1D3	-0.414188	4.67514	-9.04556	2.64768e-18	3.3993e-17	30.711
GRHL1	0.964764	5.58239	9.04532	2.65278e-18	3.4032e-17	30.7091
STK38L	-0.559405	5.24074	-9.04356	2.6902e-18	3.4485e-17	30.6953
PLXNB1	0.675221	6.83365	9.04112	2.7428e-18	3.51318e-17	30.6762
CAPS	0.984318	6.5138	9.03872	2.7956e-18	3.57801e-17	30.6574
GFRA1	-0.609438	2.31421	-9.03511	2.87707e-18	3.67942e-17	30.6291
RBP7	-0.905632	4.24528	-9.03281	2.93e-18	3.74419e-17	30.6112
RNF128	1.34044	6.6963	9.02881	3.02475e-18	3.86227e-17	30.5799
TBC1D10C	-0.777422	3.07397	-9.02366	3.15097e-18	4.0203e-17	30.5396
NPR1	-0.674117	3.37335	-9.02324	3.16147e-18	4.03057e-17	30.5363
ARHGAP25	-0.644651	3.98507	-9.01834	3.28679e-18	4.18708e-17	30.4981
PIK3CG	-0.614184	2.97963	-9.01569	3.35657e-18	4.27266e-17	30.4774
OAT	-1.02388	5.95319	-9.01434	3.39293e-18	4.31559e-17	30.4668
EDIL3	-0.734625	3.87466	-9.01344	3.41699e-18	4.34283e-17	30.4598
NKAPL	-0.24784	1.90867	-9.01279	3.4348e-18	4.36209e-17	30.4547
APLNR	-0.813814	3.88969	-9.00713	3.59258e-18	4.55894e-17	30.4105
VEGFC	-0.735452	4.5526	-9.0042	3.67675e-18	4.66215e-17	30.3877
CYP27A1	-0.998103	4.93098	-9.00357	3.6954e-18	4.68217e-17	30.3827
BICC1	-0.87376	3.41492	-8.99441	3.97349e-18	5.03064e-17	30.3113
CCDC8	-1.01938	3.72763	-8.99158	4.06352e-18	5.14064e-17	30.2892
RSPO2	-0.509032	1.91959	-8.98932	4.13697e-18	5.22953e-17	30.2716
GLB1L	-0.425319	3.8048	-8.98876	4.15519e-18	5.24853e-17	30.2672
AGTR1	-0.720007	2.49294	-8.98849	4.16417e-18	5.25582e-17	30.2651
BPI	-0.140838	1.63853	-8.98565	4.25895e-18	5.37131e-17	30.243
RASSF8	-0.680278	3.65676	-8.98342	4.3347e-18	5.46265e-17	30.2256
CHRM2	-0.739328	2.31305	-8.98321	4.34173e-18	5.46732e-17	30.224
ALPK2	-0.753912	2.5516	-8.98005	4.45174e-18	5.60154e-17	30.1994
LRRN2	-0.552112	2.28461	-8.97911	4.48508e-18	5.63917e-17	30.192
NFASC	-0.544926	2.77395	-8.97853	4.50561e-18	5.66065e-17	30.1875
NOS3	-0.580089	3.51252	-8.97534	4.62079e-18	5.80091e-17	30.1627
EFEMP2	-0.809017	6.13434	-8.97049	4.8016e-18	6.02329e-17	30.1249
GPR141	-0.353894	1.99501	-8.96731	4.92377e-18	6.17182e-17	30.1002
ETV1	-0.560996	2.79729	-8.96593	4.97762e-18	6.23457e-17	30.0895
LTBP2	-0.8681	5.50436	-8.9619	5.13885e-18	6.4316e-17	30.0581
SULT1C4	-0.456687	2.2616	-8.95734	5.32726e-18	6.66232e-17	30.0226
FCGR1A	-0.774449	2.84808	-8.95423	5.45962e-18	6.82265e-17	29.9985
IL32	-1.06876	5.26027	-8.95385	5.47592e-18	6.83782e-17	29.9955
FFAR3	-0.270712	1.82324	-8.9503	5.63166e-18	7.02694e-17	29.9679
RAB25	0.968998	8.66346	8.94796	5.73651e-18	7.15232e-17	29.9498
PODNL1	-0.70749	2.9389	-8.94605	5.8236e-18	7.2554e-17	29.9349
CORO1A	-0.910329	5.74279	-8.94549	5.84949e-18	7.28213e-17	29.9306
PLCL2	-0.764789	3.80035	-8.94429	5.90524e-18	7.34595e-17	29.9212
KLRD1	-0.386087	2.07721	-8.94395	5.92076e-18	7.35969e-17	29.9186
LGALS12	-0.446094	1.88805	-8.94297	5.96711e-18	7.41168e-17	29.911
TFEC	-0.543791	2.41958	-8.93055	6.5806e-18	8.16751e-17	29.8146
TBXA2R	-0.456113	2.73981	-8.9278	6.72508e-18	8.34052e-17	29.7933
NREP	-0.820285	4.47857	-8.9264	6.79959e-18	8.42656e-17	29.7824
IGSF9B	-0.53078	2.32414	-8.92142	7.07165e-18	8.75711e-17	29.7438
STEAP4	-0.911615	3.48468	-8.92103	7.09343e-18	8.77745e-17	29.7408
PLA2G4F	0.91841	4.05908	8.92059	7.11763e-18	8.80076e-17	29.7374
CDK15	-0.161106	1.71732	-8.91823	7.25152e-18	8.95956e-17	29.7191
UPK2	2.16411	8.54892	8.91647	7.35248e-18	9.07747e-17	29.7055
UTRN	-0.633273	4.85627	-8.91106	7.67242e-18	9.46535e-17	29.6635
TRIM22	-0.979092	5.63839	-8.90981	7.74796e-18	9.55135e-17	29.6539
PEAK1	-0.41366	3.80114	-8.89738	8.54332e-18	1.05239e-16	29.5577
ST6GALNAC3	-0.338851	2.02914	-8.89614	8.62759e-18	1.06198e-16	29.5481
JAKMIP1	-0.493499	2.18765	-8.89545	8.67403e-18	1.06689e-16	29.5428
DGKG	-0.493202	2.36203	-8.89228	8.89321e-18	1.09303e-16	29.5182
MAFB	-0.936806	5.08667	-8.88877	9.14187e-18	1.12275e-16	29.4911
CRTAM	-0.514179	2.24996	-8.88826	9.178e-18	1.12635e-16	29.4872
NTRK3	-0.449889	2.11014	-8.88473	9.43653e-18	1.15721e-16	29.4598
PLEKHG6	0.846734	5.62664	8.88356	9.52301e-18	1.16694e-16	29.4509
CD74	-1.16201	9.73413	-8.88334	9.53936e-18	1.16747e-16	29.4492
CD247	-0.858435	3.71962	-8.88332	9.54158e-18	1.16747e-16	29.4489
CYLD	-0.554752	4.92104	-8.88264	9.59229e-18	1.1728e-16	29.4437
ANGPT1	-0.650506	2.72652	-8.87793	9.95378e-18	1.2161e-16	29.4073
GFOD1	-0.653785	3.54215	-8.87127	1.04875e-17	1.28035e-16	29.3559
PPARG	1.09303	7.82207	8.86709	1.08366e-17	1.32199e-16	29.3237
FCGR2B	-0.725696	3.14214	-8.86574	1.09521e-17	1.33509e-16	29.3133
MMP19	-0.749308	3.72745	-8.86502	1.10138e-17	1.34161e-16	29.3077
JUND	-0.5524	8.59838	-8.86423	1.10821e-17	1.34893e-16	29.3016
CAMK4	-0.467332	2.57613	-8.86293	1.11957e-17	1.36174e-16	29.2916
RAB32	-0.68613	5.65044	-8.86071	1.13921e-17	1.3846e-16	29.2745
OAF	-0.586879	5.28369	-8.85871	1.15722e-17	1.40545e-16	29.2591
NACAD	-0.600277	2.68305	-8.85688	1.17392e-17	1.42468e-16	29.2449
MYO5A	-0.62734	4.56617	-8.85566	1.18518e-17	1.43728e-16	29.2356
SNX20	-0.562317	2.42566	-8.85257	1.21424e-17	1.47143e-16	29.2117
PLA2G7	-0.912432	4.68088	-8.84735	1.26486e-17	1.53164e-16	29.1715
LGI4	-0.609851	2.96328	-8.84625	1.27584e-17	1.5438e-16	29.163
STON1-GTF2A1L	-0.241703	1.64394	-8.84072	1.33229e-17	1.61092e-16	29.1204
IL21R	-0.644656	2.60767	-8.84022	1.33752e-17	1.61605e-16	29.1166
HLA-DRA	-1.36649	9.78359	-8.83782	1.36278e-17	1.64536e-16	29.0981
RNF175	-0.357737	2.11202	-8.83534	1.38951e-17	1.6764e-16	29.079
ESRP2	0.749624	5.73439	8.83423	1.40166e-17	1.68982e-16	29.0705
MICU3	-0.36934	2.22744	-8.83385	1.40579e-17	1.69355e-16	29.0676
NMUR1	-0.276775	1.84174	-8.82563	1.49904e-17	1.80456e-16	29.0044
GPM6B	-0.582321	2.85471	-8.82503	1.50609e-17	1.81173e-16	28.9997
NMT2	-0.626676	3.92892	-8.82479	1.50893e-17	1.81381e-16	28.9979
PBX3	-0.629354	4.7955	-8.82411	1.51696e-17	1.82213e-16	28.9927
PLXDC2	-0.911716	4.68405	-8.82319	1.5279e-17	1.83393e-16	28.9856
LYZ	-1.49915	7.16983	-8.81949	1.57274e-17	1.88636e-16	28.9571
CLEC11A	-0.887389	4.79211	-8.81829	1.58755e-17	1.90274e-16	28.9479
MAP3K8	-0.650278	5.32569	-8.81782	1.59341e-17	1.90837e-16	28.9443
LPAR1	-0.7626	4.35168	-8.81448	1.63543e-17	1.95727e-16	28.9187
MEFV	-0.443376	2.23567	-8.8131	1.65313e-17	1.97701e-16	28.9081
SEMA6B	-0.589523	3.89596	-8.81013	1.69194e-17	2.02194e-16	28.8852
SNCG	1.38093	8.49065	8.8097	1.69766e-17	2.02731e-16	28.8819
PDE4D	-0.602891	3.71961	-8.80664	1.73857e-17	2.07465e-16	28.8585
ARHGAP4	-0.789625	5.08147	-8.80561	1.7526e-17	2.08987e-16	28.8506
PIM2	-0.754235	5.05217	-8.80383	1.77722e-17	2.1177e-16	28.8368
MPP3	-0.485954	2.66305	-8.80149	1.80994e-17	2.15511e-16	28.8189
LCN6	-0.362798	1.77064	-8.80041	1.82519e-17	2.1717e-16	28.8106
CDH5	-0.663824	4.89545	-8.79986	1.83303e-17	2.17945e-16	28.8064
PDLIM2	-0.452275	2.96396	-8.79334	1.92854e-17	2.29135e-16	28.7564
IL2RG	-1.02975	4.74428	-8.79303	1.93322e-17	2.29525e-16	28.7541
SUSD3	-0.787788	3.32246	-8.79259	1.9399e-17	2.30151e-16	28.7507
CFD	-1.09127	6.06283	-8.79238	1.94311e-17	2.30365e-16	28.749
FCAR	-0.399625	1.99359	-8.7894	1.98867e-17	2.35596e-16	28.7262
TMEM45B	1.21787	5.99	8.78452	2.06573e-17	2.4455e-16	28.6888
KCNH2	-0.762515	2.64024	-8.78408	2.0729e-17	2.45221e-16	28.6854
SP140	-0.756779	3.16853	-8.78109	2.12159e-17	2.508e-16	28.6626
KCNAB1	-0.348026	2.28821	-8.77983	2.1426e-17	2.53101e-16	28.6529
GNG7	-0.607734	2.76952	-8.77585	2.21e-17	2.60876e-16	28.6224
BTLA	-0.470455	2.28035	-8.77356	2.24969e-17	2.6537e-16	28.6049
SERPINB9	-0.761332	3.94926	-8.769	2.33092e-17	2.74754e-16	28.57
RGL1	-0.713874	4.65894	-8.76811	2.34714e-17	2.76468e-16	28.5632
MS4A1	-1.05372	2.95472	-8.76738	2.36057e-17	2.77849e-16	28.5575
ABCB1	-0.55519	3.30662	-8.7651	2.40268e-17	2.82604e-16	28.5401
STMN3	-0.86928	4.56119	-8.76188	2.46363e-17	2.89565e-16	28.5155
SMAP2	-0.564941	6.19399	-8.76104	2.4797e-17	2.91245e-16	28.5091
WT1	-0.592936	2.16049	-8.76029	2.49416e-17	2.92734e-16	28.5034
PDE1C	-0.481228	2.3046	-8.76001	2.49973e-17	2.93178e-16	28.5012
PHF19	-0.632661	4.26251	-8.75825	2.5341e-17	2.96997e-16	28.4877
ZNF385B	-0.464186	1.88224	-8.75743	2.5502e-17	2.9867e-16	28.4815
EPDR1	-0.952009	3.91182	-8.75497	2.5994e-17	3.04215e-16	28.4627
PRKAR2B	-0.777582	3.85857	-8.74671	2.77168e-17	3.24147e-16	28.3996
SYNDIG1	-0.701914	2.45816	-8.74536	2.80082e-17	3.27321e-16	28.3893
PTP4A1	-0.603096	5.76127	-8.74211	2.87232e-17	3.35438e-16	28.3645
CD79B	-0.918954	3.64755	-8.74049	2.90879e-17	3.39455e-16	28.3521
IL34	-0.64827	3.1052	-8.7399	2.92206e-17	3.40762e-16	28.3476
RAB30	-0.449835	2.94042	-8.73788	2.96835e-17	3.45914e-16	28.3321
GZMM	-0.694745	2.70692	-8.73622	3.00661e-17	3.50124e-16	28.3195
TNFRSF11B	-0.959947	3.47057	-8.72592	3.25669e-17	3.78978e-16	28.2409
CNN3	-0.788005	7.96759	-8.72425	3.29898e-17	3.83626e-16	28.2282
SPINT1	0.741712	8.11137	8.7219	3.35975e-17	3.90416e-16	28.2103
PRG4	-0.660907	2.26735	-8.71749	3.47647e-17	4.03694e-16	28.1767
GIMAP1	-0.48672	2.64875	-8.7171	3.48678e-17	4.04605e-16	28.1738
THEM6	0.711689	6.67904	8.71458	3.55546e-17	4.12283e-16	28.1546
CCL18	-1.41931	4.53535	-8.71083	3.66045e-17	4.24157e-16	28.1259
ADCY9	-0.589871	3.9618	-8.70815	3.73708e-17	4.32731e-16	28.1056
WNT2B	-0.392033	2.51484	-8.70663	3.78122e-17	4.37534e-16	28.094
TUBA1A	-1.03236	7.65001	-8.70247	3.90501e-17	4.51539e-16	28.0623
DUSP3	-0.482074	6.04826	-8.70223	3.91213e-17	4.52044e-16	28.0605
KCND3	-0.714646	2.96559	-8.70213	3.91526e-17	4.52088e-16	28.0597
SYNE3	-0.471185	2.75218	-8.69447	4.15409e-17	4.79327e-16	28.0015
PDCD1	-0.711773	2.54838	-8.69431	4.15917e-17	4.79576e-16	28.0003
ITGA9	-0.664475	4.22098	-8.69153	4.24957e-17	4.89655e-16	27.9791
LRCH1	-0.421725	4.30207	-8.68939	4.32034e-17	4.97461e-16	27.9629
NCS1	-0.687303	5.13307	-8.68783	4.37263e-17	5.03129e-16	27.9511
GPR174	-0.585086	2.47576	-8.68521	4.46203e-17	5.13055e-16	27.9311
SRC	0.621745	7.09786	8.68384	4.50952e-17	5.18152e-16	27.9207
UGCG	-0.523733	6.67342	-8.67817	4.71134e-17	5.40963e-16	27.8777
EHBP1	-0.525714	5.51634	-8.6779	4.72109e-17	5.41703e-16	27.8756
SARDH	-0.471911	2.46942	-8.67765	4.73022e-17	5.42372e-16	27.8737
BCL6B	-0.585299	3.69037	-8.67739	4.73967e-17	5.43077e-16	27.8718
GPR3	-0.424728	2.59827	-8.67678	4.76199e-17	5.45252e-16	27.8671
ADIPOQ	-0.630152	1.85919	-8.67036	5.00381e-17	5.72542e-16	27.8184
MASP1	-0.519402	2.067	-8.66913	5.05161e-17	5.77609e-16	27.8091
NUDT10	-0.441194	1.91193	-8.66683	5.14186e-17	5.87519e-16	27.7916
CEACAM4	-0.460575	2.0832	-8.6662	5.16696e-17	5.89975e-16	27.7869
OLFML2A	-0.763836	4.4183	-8.6646	5.23102e-17	5.96875e-16	27.7747
MLXIP	-0.463116	4.97302	-8.6637	5.26778e-17	6.00432e-16	27.7678
TMEM132C	-0.365859	1.9029	-8.66365	5.26952e-17	6.00432e-16	27.7675
NOX4	-0.537035	2.56789	-8.65933	5.44794e-17	6.20092e-16	27.7348
LDB3	-0.504722	2.28782	-8.65929	5.44961e-17	6.20092e-16	27.7345
BEND6	-0.546668	2.58164	-8.65757	5.52232e-17	6.2793e-16	27.7214
ABLIM2	-0.534445	2.47234	-8.65704	5.54482e-17	6.30052e-16	27.7174
TREM2	-0.952659	4.35656	-8.65569	5.60276e-17	6.36194e-16	27.7072
TMEM255A	-0.470135	2.07841	-8.65319	5.71212e-17	6.48164e-16	27.6882
CD79A	-1.33178	4.00244	-8.65307	5.71699e-17	6.48268e-16	27.6874
ARID5B	-0.686898	6.17804	-8.65296	5.72206e-17	6.48394e-16	27.6865
RAPGEFL1	1.06518	6.50272	8.64711	5.9858e-17	6.77812e-16	27.6422
PARP15	-0.586091	2.74216	-8.64394	6.13358e-17	6.94067e-16	27.6182
ST3GAL6	-0.475462	2.58155	-8.63763	6.43866e-17	7.28087e-16	27.5704
THEMIS	-0.452361	2.21902	-8.63617	6.51121e-17	7.35785e-16	27.5594
DTX1	-0.63556	2.49676	-8.63108	6.77096e-17	7.6461e-16	27.5209
NME8	-0.382667	2.14348	-8.63079	6.78652e-17	7.6584e-16	27.5187
BACE1	-0.593021	4.16962	-8.63037	6.8083e-17	7.6777e-16	27.5155
CYP1B1	-1.2498	4.11677	-8.62929	6.86481e-17	7.73611e-16	27.5074
BCHE	-0.758472	2.49255	-8.62513	7.08775e-17	7.98187e-16	27.476
VWF	-0.724919	6.98611	-8.62307	7.2008e-17	8.10361e-16	27.4604
CEACAM21	-0.48482	2.34297	-8.61943	7.40526e-17	8.328e-16	27.4329
KCTD10	-0.411197	5.5717	-8.61542	7.63692e-17	8.58264e-16	27.4026
JUNB	-0.582612	7.96306	-8.61398	7.72174e-17	8.67203e-16	27.3917
EML1	-0.692707	4.03857	-8.60277	8.41517e-17	9.44433e-16	27.3071
PLXDC1	-0.573022	3.68781	-8.60151	8.49696e-17	9.5296e-16	27.2976
CDK14	-0.793975	3.79578	-8.5943	8.97953e-17	1.00639e-15	27.2433
CACNA2D4	-0.330151	2.16047	-8.59353	9.03258e-17	1.01165e-15	27.2375
PLAGL1	-0.698914	3.51177	-8.5914	9.18154e-17	1.02763e-15	27.2214
REEP6	1.08853	6.27212	8.59104	9.20709e-17	1.02979e-15	27.2187
DTX4	0.767624	5.4127	8.59039	9.25301e-17	1.03422e-15	27.2138
ACP6	0.666293	5.36954	8.585	9.64267e-17	1.07683e-15	27.1732
TXNRD1	-0.839545	5.48518	-8.58494	9.64733e-17	1.07683e-15	27.1727
RELN	-0.68897	2.31984	-8.58383	9.72982e-17	1.08529e-15	27.1644
SLFN12L	-0.500117	2.59394	-8.57996	1.00218e-16	1.11711e-15	27.1353
ETS1	-0.642598	6.29071	-8.57977	1.00366e-16	1.11799e-15	27.1338
CSTB	0.693339	10.7562	8.57818	1.01592e-16	1.13088e-15	27.1219
EOMES	-0.594048	2.39914	-8.57765	1.02012e-16	1.13479e-15	27.1178
C1QTNF7	-0.532831	2.51112	-8.57713	1.02413e-16	1.13848e-15	27.114
SLC44A3	0.80708	6.39619	8.57489	1.04182e-16	1.15735e-15	27.0971
ME1	-0.776579	4.44738	-8.57094	1.07381e-16	1.19209e-15	27.0674
CD2	-1.0879	4.73132	-8.56788	1.0992e-16	1.21945e-15	27.0444
CPQ	-0.725662	5.12329	-8.56679	1.10846e-16	1.22889e-15	27.0362
SH3PXD2B	-0.666573	5.43604	-8.56638	1.1119e-16	1.23187e-15	27.0331
ARMC9	-0.462456	3.65373	-8.56411	1.13134e-16	1.25257e-15	27.0161
LRRN4CL	-0.60947	2.74632	-8.56111	1.15759e-16	1.28076e-15	26.9935
GABARAPL1	-0.587241	6.67934	-8.56016	1.16601e-16	1.28921e-15	26.9864
NTRK1	-0.379271	1.96409	-8.55875	1.17865e-16	1.30231e-15	26.9758
TMEM150B	-0.541873	2.3289	-8.55855	1.18049e-16	1.30347e-15	26.9742
RNF145	-0.708794	5.86852	-8.55748	1.19016e-16	1.31326e-15	26.9662
ARHGAP1	-0.4765	7.46097	-8.55006	1.25957e-16	1.38891e-15	26.9105
LPAR4	-0.208747	1.82802	-8.54758	1.28364e-16	1.4145e-15	26.8919
CCL3L1	-0.677631	2.62745	-8.54344	1.32487e-16	1.45896e-15	26.8608
SSPN	-0.643503	4.31694	-8.53604	1.40172e-16	1.54255e-15	26.8053
GPM6A	-0.293607	1.77454	-8.53502	1.41265e-16	1.55354e-15	26.7977
CLNK	-0.357425	2.0692	-8.53291	1.4356e-16	1.57771e-15	26.7819
CD22	-0.758215	2.50942	-8.53183	1.4475e-16	1.58973e-15	26.7737
TMEM220	-0.438446	2.54121	-8.52005	1.58335e-16	1.73777e-15	26.6855
PDZD4	-0.689151	2.64003	-8.51444	1.65243e-16	1.81237e-15	26.6435
ADPRH	-0.539524	3.40216	-8.51381	1.66041e-16	1.8199e-15	26.6388
REM1	-0.541412	2.46545	-8.51218	1.68107e-16	1.84132e-15	26.6266
TPP1	-0.530747	7.26834	-8.5101	1.70793e-16	1.86847e-15	26.6111
POU2F2	-0.573513	2.94887	-8.51009	1.70813e-16	1.86847e-15	26.6109
MARVELD1	-0.729056	5.36244	-8.50659	1.75412e-16	1.91749e-15	26.5848
RFX8	-0.430121	2.14547	-8.50563	1.767e-16	1.93029e-15	26.5776
HIP1R	0.521685	6.20976	8.50065	1.83526e-16	2.00352e-15	26.5404
TPO	-0.327143	1.73408	-8.49985	1.84638e-16	2.01432e-15	26.5344
PTCH2	-0.364155	2.37598	-8.49841	1.86666e-16	2.0351e-15	26.5237
NCALD	-0.676418	3.46379	-8.49683	1.88924e-16	2.05834e-15	26.5119
GPIHBP1	-0.599073	2.61617	-8.49009	1.98859e-16	2.16515e-15	26.4615
LAG3	-0.893242	3.3825	-8.48938	1.99931e-16	2.17538e-15	26.4562
RASSF9	-0.556318	2.30332	-8.48855	2.01192e-16	2.18765e-15	26.45
KLRB1	-0.746657	3.50456	-8.48676	2.03949e-16	2.21616e-15	26.4366
SIK3	-0.42217	4.35622	-8.48575	2.05508e-16	2.23162e-15	26.4291
PTPRJ	-0.639685	4.117	-8.48518	2.06399e-16	2.23981e-15	26.4249
CD3G	-0.676752	2.98876	-8.48506	2.06598e-16	2.24049e-15	26.4239
NINJ2	-0.632777	3.11961	-8.48368	2.08768e-16	2.26131e-15	26.4137
GALE	0.566966	6.46396	8.48366	2.08794e-16	2.26131e-15	26.4135
CD83	-0.681651	4.7576	-8.48127	2.12628e-16	2.30132e-15	26.3957
NFATC4	-0.623137	3.97799	-8.48022	2.14318e-16	2.31808e-15	26.3879
SPINK13	-0.366928	1.76905	-8.47903	2.16267e-16	2.33762e-15	26.379
NCR3	-0.433628	2.10405	-8.4762	2.20962e-16	2.3868e-15	26.3579
COL21A1	-0.680254	2.62659	-8.47461	2.23649e-16	2.41423e-15	26.346
HLA-DRB1	-1.31837	7.86752	-8.46993	2.31725e-16	2.49977e-15	26.3111
FAM216A	-0.504398	3.53448	-8.46556	2.39522e-16	2.58218e-15	26.2786
SEMA3F	0.804579	7.34472	8.46499	2.40556e-16	2.59162e-15	26.2743
TMIGD3	-0.443766	2.50604	-8.46264	2.44882e-16	2.6365e-15	26.2568
MS4A7	-0.913734	4.5296	-8.46225	2.45617e-16	2.64267e-15	26.2539
ELL2	-0.639077	5.15143	-8.45974	2.50322e-16	2.69153e-15	26.2352
FCGR3A	-1.15306	4.89285	-8.45911	2.51513e-16	2.70257e-15	26.2305
AMPH	-0.573862	2.39986	-8.4531	2.63233e-16	2.82665e-15	26.1858
DSEL	-0.579452	2.8101	-8.44817	2.73235e-16	2.93214e-15	26.1491
SERINC2	0.881356	8.74283	8.44765	2.7431e-16	2.94175e-15	26.1452
RELT	-0.446246	3.3784	-8.44586	2.78062e-16	2.98004e-15	26.1319
CYGB	-0.652623	5.03505	-8.44325	2.836e-16	3.03741e-15	26.1125
FAM78A	-0.552127	2.75148	-8.44285	2.8447e-16	3.04474e-15	26.1095
AKT3	-0.641818	3.52039	-8.44187	2.86585e-16	3.06538e-15	26.1022
SOCS1	-0.716012	3.8419	-8.43935	2.92096e-16	3.12229e-15	26.0835
CXorf65	-0.396348	2.0298	-8.43839	2.9421e-16	3.1427e-15	26.0764
LPP	-0.559756	6.17492	-8.43831	2.94389e-16	3.1427e-15	26.0758
GJA5	-0.790341	3.96717	-8.43823	2.9458e-16	3.1427e-15	26.0752
LPL	-0.791576	3.42097	-8.43654	2.98362e-16	3.18097e-15	26.0626
ACTN2	-0.508187	2.04492	-8.43361	3.0504e-16	3.25007e-15	26.0409
ITPKB	-0.481168	5.05998	-8.43181	3.09209e-16	3.29235e-15	26.0275
VIPR2	-0.354629	1.94757	-8.43044	3.12435e-16	3.32454e-15	26.0173
SNAP25	-0.714731	2.46855	-8.42967	3.1425e-16	3.34169e-15	26.0116
DHH	-0.260095	1.96485	-8.42944	3.14808e-16	3.34545e-15	26.0099
SH2D4A	0.766576	5.86927	8.42562	3.24017e-16	3.44108e-15	25.9815
PPP1R15A	-0.595306	8.03953	-8.42467	3.26348e-16	3.46359e-15	25.9745
STK17A	-0.527557	4.81122	-8.42136	3.34603e-16	3.54891e-15	25.9499
CYP7B1	-0.623056	3.5152	-8.42119	3.3505e-16	3.55135e-15	25.9486
HOXB7	0.722524	6.32515	8.4187	3.41394e-16	3.61627e-15	25.9302
TMEM59L	-0.504233	2.11312	-8.41822	3.42649e-16	3.62721e-15	25.9266
SGMS2	-0.652927	3.86157	-8.41442	3.52594e-16	3.73009e-15	25.8985
ITGA11	-0.955937	3.91805	-8.41064	3.62809e-16	3.83567e-15	25.8704
TIAM2	-0.415089	2.86411	-8.41025	3.63884e-16	3.84457e-15	25.8675
SLCO2A1	-0.771879	4.92341	-8.40904	3.67216e-16	3.87727e-15	25.8585
PMEPA1	-0.957766	4.8507	-8.40343	3.83084e-16	4.04221e-15	25.8169
EMILIN2	-0.739989	4.81556	-8.40274	3.85062e-16	4.06047e-15	25.8119
BMP2K	-0.412314	3.57896	-8.40185	3.87667e-16	4.08532e-15	25.8052
NLRP6	-0.245794	1.80016	-8.40082	3.90677e-16	4.1144e-15	25.7976
IL2RB	-0.829573	3.68761	-8.40042	3.91863e-16	4.12424e-15	25.7947
TIMP3	-0.743542	4.45932	-8.39551	4.06624e-16	4.27685e-15	25.7583
VNN1	-0.569436	2.17871	-8.39436	4.10157e-16	4.31125e-15	25.7498
PABPC5	-0.352299	2.10519	-8.39207	4.17309e-16	4.38361e-15	25.7328
HPD	-0.635634	2.39605	-8.3859	4.37124e-16	4.58882e-15	25.6872
MT1X	-1.01704	6.41647	-8.37556	4.72488e-16	4.95689e-15	25.6108
MACF1	-0.524744	5.97685	-8.37545	4.72898e-16	4.95739e-15	25.6099
LCP1	-1.00412	7.15199	-8.37538	4.7314e-16	4.95739e-15	25.6094
HAS2	-0.943617	3.6771	-8.37452	4.76193e-16	4.9862e-15	25.6031
PLEKHH1	0.77289	4.39833	8.36987	4.93132e-16	5.16027e-15	25.5687
RAB40C	0.440294	5.53344	8.36758	5.01686e-16	5.24644e-15	25.5518
GPR162	-0.53076	2.78804	-8.36692	5.04181e-16	5.26918e-15	25.547
CEBPA	0.922032	6.45609	8.36671	5.04974e-16	5.2741e-15	25.5454
RASGRP3	-0.475813	3.67053	-8.36424	5.14424e-16	5.36938e-15	25.5272
MKRN2OS	0.731364	3.9479	8.36319	5.18508e-16	5.40857e-15	25.5194
RBFOX3	-0.459933	1.92586	-8.3628	5.20031e-16	5.42101e-15	25.5165
SSH3	0.800954	7.37454	8.36218	5.22443e-16	5.4427e-15	25.512
SNX9	-0.383044	5.79012	-8.35927	5.34006e-16	5.55962e-15	25.4905
TRPC1	-0.612395	3.62922	-8.358	5.39107e-16	5.60917e-15	25.4811
DLL1	-0.697123	4.11664	-8.35733	5.41833e-16	5.63397e-15	25.4762
CYSLTR1	-0.537265	2.65186	-8.3568	5.43998e-16	5.6529e-15	25.4723
SLC2A5	-0.71306	3.0047	-8.35616	5.46602e-16	5.67636e-15	25.4676
CD1C	-0.756843	3.05411	-8.35411	5.55107e-16	5.76104e-15	25.4524
ARHGEF10	-0.535801	3.58402	-8.34841	5.79332e-16	6.00865e-15	25.4104
LAP3	-0.672763	6.95405	-8.34085	6.13132e-16	6.3552e-15	25.3547
GZMA	-1.13873	4.47097	-8.33705	6.3086e-16	6.53481e-15	25.3267
NR2F1	-0.791351	4.65203	-8.33569	6.37289e-16	6.59724e-15	25.3167
CCDC50	-0.452599	5.56398	-8.3314	6.58091e-16	6.80829e-15	25.2851
NDUFA7	0.389729	4.89122	8.32698	6.80236e-16	7.03296e-15	25.2526
ENPP2	-0.835527	4.59902	-8.32614	6.84566e-16	7.07327e-15	25.2464
DDX24	-0.416903	6.83765	-8.32488	6.91025e-16	7.13551e-15	25.2372
CPEB4	-0.472413	4.2843	-8.32359	6.97723e-16	7.20015e-15	25.2277
PRPH2	-0.475427	2.3523	-8.31643	7.36129e-16	7.59171e-15	25.175
PLA1A	-0.827667	3.15366	-8.31605	7.38224e-16	7.60853e-15	25.1722
VCL	-0.587446	7.68657	-8.3142	7.48486e-16	7.70946e-15	25.1587
HIF1A	-0.630493	7.19858	-8.31382	7.5062e-16	7.72658e-15	25.1559
DPEP1	-0.587543	2.19576	-8.31084	7.67538e-16	7.89578e-15	25.134
GAPT	-0.44834	2.17684	-8.29818	8.4367e-16	8.67352e-15	25.041
MEIS1	-0.561015	4.04178	-8.29692	8.51675e-16	8.75034e-15	25.0317
MS4A2	-0.553082	2.66288	-8.29667	8.53263e-16	8.76116e-15	25.0299
CUBN	-0.320871	2.45662	-8.29592	8.58076e-16	8.80507e-15	25.0244
SLC15A3	-0.798695	4.61833	-8.29281	8.78209e-16	9.00603e-15	25.0016
TSC22D1	-0.591162	6.22803	-8.29121	8.88734e-16	9.10827e-15	24.9899
FAM124B	-0.348052	2.16181	-8.2905	8.93456e-16	9.15096e-15	24.9847
TPM4	-0.530015	8.03126	-8.29001	8.96753e-16	9.17899e-15	24.9811
CYS1	-0.505839	2.28821	-8.28947	9.00378e-16	9.21035e-15	24.9771
MGARP	-0.380286	2.07332	-8.28556	9.2701e-16	9.47687e-15	24.9485
IGSF10	-0.56321	2.07191	-8.27574	9.97383e-16	1.019e-14	24.8766
CD274	-0.703002	2.97781	-8.27436	1.00774e-15	1.02894e-14	24.8664
CERK	-0.694737	4.74162	-8.27319	1.01652e-15	1.03726e-14	24.8579
FAM183A	0.939216	4.60744	8.27015	1.03986e-15	1.06041e-14	24.8356
NFKBIZ	-0.722768	5.92645	-8.26914	1.04767e-15	1.06771e-14	24.8282
GPRASP1	-0.531894	3.81104	-8.26905	1.0484e-15	1.0678e-14	24.8276
ZNF816	0.555801	5.81316	8.26765	1.05936e-15	1.07829e-14	24.8173
KCNQ5	-0.385999	1.93766	-8.26567	1.07511e-15	1.09364e-14	24.8028
COMP	-1.66468	5.31981	-8.26426	1.08647e-15	1.10451e-14	24.7925
MCOLN2	-0.638352	3.10055	-8.26371	1.09091e-15	1.10834e-14	24.7885
TM7SF2	0.766754	6.13917	8.2635	1.09263e-15	1.10939e-14	24.787
KLHL41	-0.504689	2.38126	-8.25903	1.12953e-15	1.14616e-14	24.7543
ADCY7	-0.579167	3.18278	-8.25274	1.18366e-15	1.20034e-14	24.7083
SH3GLB2	0.560542	7.12145	8.24878	1.21906e-15	1.23514e-14	24.6794
ANKH	-0.675691	4.26721	-8.24873	1.21948e-15	1.23514e-14	24.679
MRPL27	0.373844	6.96039	8.2481	1.22522e-15	1.24018e-14	24.6744
FAM167A	-0.387362	2.00196	-8.24713	1.23412e-15	1.24828e-14	24.6673
IL13	-0.13018	1.61297	-8.24706	1.23474e-15	1.24828e-14	24.6668
RARA	-0.400396	5.27071	-8.24369	1.266e-15	1.2791e-14	24.6423
CR2	-0.887766	2.35131	-8.24299	1.27267e-15	1.28504e-14	24.6371
FGF13	-0.327062	2.05833	-8.24258	1.2765e-15	1.28812e-14	24.6342
CNGA1	1.05864	4.61013	8.23881	1.31274e-15	1.32387e-14	24.6067
CD180	-0.557655	2.56145	-8.2385	1.31583e-15	1.32618e-14	24.6043
MAPK13	0.56334	6.50792	8.23487	1.35177e-15	1.36156e-14	24.5779
AP1M2	0.75782	6.94177	8.23345	1.36606e-15	1.37511e-14	24.5675
LDLRAD3	-0.589359	3.55739	-8.23243	1.37647e-15	1.38475e-14	24.5601
PCGF5	-0.389477	4.31357	-8.22923	1.40957e-15	1.41717e-14	24.5367
FXYD3	1.09825	8.03987	8.22723	1.43058e-15	1.43741e-14	24.5222
PNMA2	-0.511258	2.13102	-8.22707	1.43228e-15	1.43824e-14	24.521
TMEM200B	-0.716446	3.13526	-8.22534	1.45081e-15	1.45595e-14	24.5084
CLIP4	-0.674714	4.19124	-8.22363	1.46927e-15	1.47358e-14	24.496
COMT	0.560514	7.45601	8.22349	1.47088e-15	1.47429e-14	24.4949
HLA-F	-0.963738	5.90894	-8.21872	1.52381e-15	1.52641e-14	24.4602
IFIT5	-0.549184	4.81763	-8.21698	1.54351e-15	1.5452e-14	24.4476
PAFAH1B3	0.602648	7.26249	8.21195	1.60212e-15	1.6029e-14	24.4109
PREX1	-0.625718	4.80884	-8.20769	1.65358e-15	1.65338e-14	24.3799
TM6SF2	-0.347882	2.13748	-8.20203	1.72431e-15	1.72305e-14	24.3387
ATP1B2	-0.48899	2.75647	-8.19994	1.75115e-15	1.7488e-14	24.3236
CYP4F22	1.54377	5.52588	8.19584	1.80508e-15	1.80157e-14	24.2938
ZNF438	-0.459672	4.25301	-8.19472	1.82013e-15	1.81549e-14	24.2856
FAXDC2	-0.522398	2.90379	-8.19233	1.85254e-15	1.84669e-14	24.2683
ARMC12	-0.292955	1.90797	-8.17825	2.05582e-15	2.04808e-14	24.166
LEFTY2	-0.455656	1.97591	-8.17456	2.11249e-15	2.10326e-14	24.1393
FAAH	0.765628	6.3795	8.17269	2.14186e-15	2.13121e-14	24.1257
HID1	0.834263	5.83394	8.16265	2.30658e-15	2.29372e-14	24.053
RSU1	-0.459247	6.26622	-8.16225	2.31339e-15	2.2991e-14	24.0501
SLC37A4	0.443286	5.59275	8.15753	2.39525e-15	2.37901e-14	24.0159
RNF217	-0.548065	3.02092	-8.15719	2.40132e-15	2.3836e-14	24.0134
MMD	-0.808984	4.61002	-8.15632	2.41673e-15	2.39744e-14	24.0072
CDA	-0.789364	3.98088	-8.15407	2.45716e-15	2.43608e-14	23.9909
MAGEH1	-0.68404	5.16921	-8.15351	2.46744e-15	2.4448e-14	23.9868
MSANTD3	-0.43972	4.71767	-8.15266	2.48279e-15	2.45851e-14	23.9807
CD40LG	-0.47975	2.33185	-8.1473	2.58293e-15	2.55613e-14	23.9418
DIO2	-0.813709	2.88523	-8.14551	2.6171e-15	2.58839e-14	23.9289
ADAMTS15	-0.650942	2.59326	-8.13929	2.73973e-15	2.70804e-14	23.884
ASAP1	-0.56048	6.03894	-8.13827	2.76037e-15	2.7268e-14	23.8766
PLXND1	-0.622875	5.44357	-8.13705	2.78518e-15	2.74965e-14	23.8678
CXADR	0.890203	6.63701	8.13638	2.79898e-15	2.76158e-14	23.8629
CCR6	-0.279881	1.95857	-8.1363	2.80062e-15	2.76158e-14	23.8624
S1PR2	-0.433825	3.92953	-8.13613	2.80418e-15	2.76342e-14	23.8611
SPSB1	-0.562736	5.51416	-8.13287	2.87221e-15	2.82877e-14	23.8376
TMEM156	-0.502021	2.51239	-8.12654	3.00906e-15	2.96177e-14	23.7919
MEF2A	-0.443541	4.76109	-8.12535	3.03544e-15	2.98594e-14	23.7833
DOK3	-0.491843	3.01175	-8.11797	3.20462e-15	3.15047e-14	23.73
SAV1	-0.449614	5.04228	-8.11645	3.24067e-15	3.18401e-14	23.719
MMP16	-0.404293	2.30274	-8.1151	3.27282e-15	3.21367e-14	23.7093
TRANK1	-0.563035	4.96144	-8.11468	3.283e-15	3.22174e-14	23.7063
ZNF692	0.521202	5.97273	8.11389	3.30202e-15	3.23847e-14	23.7006
MGLL	-0.695342	4.15526	-8.11132	3.36492e-15	3.29818e-14	23.6821
F8	-0.471528	2.92438	-8.10711	3.47059e-15	3.39973e-14	23.6517
PLD4	-0.481112	2.34765	-8.10684	3.47738e-15	3.40435e-14	23.6498
CDH19	-0.486206	2.00556	-8.10631	3.49106e-15	3.4157e-14	23.646
BVES	-0.68342	2.7856	-8.1062	3.49379e-15	3.41634e-14	23.6452
CDC42BPG	0.593036	5.41187	8.10022	3.6504e-15	3.56735e-14	23.6021
SLC17A9	-0.639657	3.14713	-8.10013	3.65291e-15	3.56767e-14	23.6015
EPSTI1	-0.99068	5.15803	-8.09661	3.74848e-15	3.65883e-14	23.5761
PTPN5	-0.234052	1.8666	-8.09354	3.83375e-15	3.73984e-14	23.554
MFSD5	0.415642	6.672	8.09149	3.89174e-15	3.79416e-14	23.5393
SEMA3G	-0.499007	3.11293	-8.08979	3.94055e-15	3.83946e-14	23.527
CXCL9	-1.45145	4.45868	-8.08951	3.94843e-15	3.84485e-14	23.5251
TMEM130	-0.497546	2.20191	-8.08581	4.05704e-15	3.94827e-14	23.4984
ACAT1	-0.581798	5.64559	-8.08552	4.06551e-15	3.95417e-14	23.4964
CXCR6	-0.657427	2.92976	-8.08268	4.15088e-15	4.03481e-14	23.476
TCL1A	-0.649339	2.04518	-8.0801	4.23021e-15	4.10949e-14	23.4574
ENPP3	-0.276582	1.91434	-8.07876	4.27171e-15	4.14735e-14	23.4478
RYR3	-0.402094	2.15518	-8.07827	4.28727e-15	4.15999e-14	23.4442
RAP1GAP	0.85454	5.05651	8.07696	4.3285e-15	4.19751e-14	23.4348
TM4SF1	-1.12819	7.14747	-8.07636	4.34742e-15	4.21338e-14	23.4305
LAMC1	-0.582444	7.5903	-8.07574	4.36716e-15	4.23001e-14	23.4261
PPP1R12A	-0.481915	5.40601	-8.07545	4.37647e-15	4.23652e-14	23.424
SCARA3	-0.935032	4.62851	-8.07077	4.52904e-15	4.38164e-14	23.3904
FCHSD2	-0.406672	6.01789	-8.06837	4.60907e-15	4.45643e-14	23.3732
CC2D2B	-0.172819	1.90322	-8.06453	4.74028e-15	4.5806e-14	23.3456
C2CD4B	-0.658531	2.72084	-8.06334	4.78171e-15	4.61791e-14	23.337
CYTH3	-0.514969	4.58515	-8.06211	4.82481e-15	4.65679e-14	23.3282
TEAD4	-0.714202	4.60537	-8.05864	4.94885e-15	4.77371e-14	23.3033
VNN2	-0.645692	2.69146	-8.04946	5.29181e-15	5.10153e-14	23.2375
ARMCX1	-0.797289	4.45863	-8.04773	5.35913e-15	5.16339e-14	23.2251
ICAM3	-0.564682	3.81655	-8.04594	5.4294e-15	5.22803e-14	23.2123
TSPAN7	-0.903986	4.32111	-8.0387	5.72387e-15	5.50835e-14	23.1605
PMCH	-0.226382	1.87479	-8.03613	5.83216e-15	5.60927e-14	23.1421
IL12RB2	-0.521764	2.33739	-8.03198	6.01099e-15	5.77788e-14	23.1124
VIPR1	0.859588	4.87491	8.02935	6.12745e-15	5.88637e-14	23.0936
SSTR2	-0.509172	4.0671	-8.02861	6.16041e-15	5.91457e-14	23.0883
PRPH	-0.390544	1.78218	-8.02747	6.21208e-15	5.96069e-14	23.0801
CACNA1H	-0.860012	3.8524	-8.02176	6.47546e-15	6.20978e-14	23.0393
LTB	-0.89879	4.17662	-8.01538	6.78311e-15	6.50101e-14	22.9938
ADRA1D	-0.253233	1.85268	-8.01023	7.04189e-15	6.74509e-14	22.957
ZBED2	-0.670557	2.44091	-8.00323	7.40965e-15	7.0932e-14	22.9071
AZIN2	-0.347207	2.60129	-8.00253	7.44735e-15	7.12199e-14	22.9021
SNAI2	-0.870778	5.49963	-8.00251	7.4484e-15	7.12199e-14	22.9019
MGST2	0.551374	7.70289	7.99962	7.60641e-15	7.26884e-14	22.8813
PALM	-0.870054	3.71023	-7.99712	7.74571e-15	7.39765e-14	22.8635
GFI1	-0.548147	2.63257	-7.99573	7.82448e-15	7.46853e-14	22.8536
CYP46A1	-0.230516	1.84618	-7.99251	8.00964e-15	7.64082e-14	22.8306
PHLDB3	0.590209	5.45288	7.98945	8.18908e-15	7.80746e-14	22.8089
FOXD3	-0.321269	1.83462	-7.9889	8.22227e-15	7.83455e-14	22.8049
SIRT7	0.400563	5.74462	7.98771	8.29359e-15	7.89792e-14	22.7964
TMC8	-0.630782	3.78936	-7.98624	8.38242e-15	7.97789e-14	22.786
TCN2	-0.685621	5.46308	-7.98249	8.61369e-15	8.19324e-14	22.7593
SCAP	0.55563	7.61746	7.98218	8.63268e-15	8.20655e-14	22.7571
ARHGAP18	-0.448768	4.83081	-7.9814	8.68193e-15	8.24859e-14	22.7515
HLA-DOB	-0.839236	3.544	-7.98032	8.75016e-15	8.3086e-14	22.7438
CARD16	-0.638006	4.56039	-7.97934	8.81216e-15	8.36263e-14	22.7369
SH2D3C	-0.494794	3.86924	-7.97798	8.89944e-15	8.44057e-14	22.7272
FCRLB	1.04685	4.26718	7.97686	8.97211e-15	8.50458e-14	22.7192
TCEAL3	-0.557489	6.37208	-7.97655	8.99214e-15	8.51865e-14	22.717
HMGCS2	2.0116	7.33246	7.97531	9.07388e-15	8.59112e-14	22.7082
CLEC1A	-0.435492	2.58927	-7.97411	9.1526e-15	8.66066e-14	22.6997
PFKFB3	-0.726184	5.58234	-7.9731	9.22019e-15	8.71959e-14	22.6925
ANKRD53	-0.281413	2.06872	-7.96589	9.7146e-15	9.18186e-14	22.6412
GJA4	-0.656425	4.42165	-7.96542	9.74746e-15	9.20762e-14	22.6379
FAM83H	0.608415	7.02004	7.96465	9.80179e-15	9.25361e-14	22.6324
UBLCP1	-0.453079	5.87201	-7.96393	9.85327e-15	9.29686e-14	22.6273
TBX3	1.03016	7.62926	7.96303	9.91777e-15	9.35235e-14	22.6209
SLC46A3	-0.680131	4.30291	-7.96217	9.97955e-15	9.4052e-14	22.6148
PRKCQ	-0.739261	3.06297	-7.96051	1.01001e-14	9.51333e-14	22.603
SAMD10	0.519204	4.64291	7.95845	1.02521e-14	9.65095e-14	22.5883
DTHD1	-0.28412	1.9515	-7.95698	1.03615e-14	9.7484e-14	22.5779
TSPYL2	-0.494589	5.64949	-7.95633	1.04105e-14	9.78883e-14	22.5733
REV3L	-0.484601	4.491	-7.95394	1.05913e-14	9.95317e-14	22.5564
GDPD5	-0.513272	3.20058	-7.9533	1.06408e-14	9.99391e-14	22.5518
XKR4	-0.239301	1.68346	-7.9513	1.07958e-14	1.01337e-13	22.5376
NPRL2	0.380434	6.08128	7.94787	1.10666e-14	1.0382e-13	22.5133
CCDC107	-0.411924	4.25118	-7.94453	1.13375e-14	1.06301e-13	22.4896
PTCRA	-0.249047	1.74361	-7.94324	1.14429e-14	1.07227e-13	22.4805
CDC25B	-0.624989	5.91018	-7.93755	1.19235e-14	1.1161e-13	22.4401
BCAT1	-0.916163	3.80889	-7.93754	1.19242e-14	1.1161e-13	22.44
LRRTM2	-0.180172	1.80614	-7.93226	1.23877e-14	1.15882e-13	22.4026
FUT7	-0.430562	2.22361	-7.93193	1.2417e-14	1.1609e-13	22.4003
PPDPF	0.528743	9.33311	7.93168	1.24391e-14	1.1623e-13	22.3986
ITGA8	-0.737657	3.80309	-7.92735	1.28341e-14	1.19853e-13	22.3679
CORO6	-0.593355	2.57031	-7.92702	1.28644e-14	1.20068e-13	22.3656
FCER2	-0.620954	2.06749	-7.92508	1.30458e-14	1.21692e-13	22.3518
OTUD1	-0.536492	4.81031	-7.92344	1.32011e-14	1.2307e-13	22.3402
PHLDB2	-0.706601	4.99411	-7.92269	1.32725e-14	1.23666e-13	22.3349
PPP1R12B	-0.617007	3.8772	-7.92019	1.35145e-14	1.25849e-13	22.3172
IER2	-0.462767	6.43367	-7.91951	1.35803e-14	1.2639e-13	22.3124
DEGS2	0.935494	4.15491	7.91854	1.36756e-14	1.27204e-13	22.3056
PAPLN	-0.666683	3.55649	-7.91739	1.37899e-14	1.28195e-13	22.2974
GLIS3	-0.629998	3.38563	-7.91484	1.40453e-14	1.30496e-13	22.2794
CDO1	-0.607665	2.41118	-7.91125	1.44129e-14	1.33835e-13	22.254
TBX4	-0.631297	2.46233	-7.91007	1.45366e-14	1.34908e-13	22.2456
SP110	-0.480277	4.71363	-7.90829	1.47234e-14	1.36564e-13	22.2331
NACC2	-0.528179	4.19193	-7.90765	1.47919e-14	1.37122e-13	22.2286
FAM219B	0.441297	4.45767	7.90693	1.48684e-14	1.37753e-13	22.2235
DHRS2	1.86936	8.07557	7.90663	1.49009e-14	1.37976e-13	22.2213
IL27RA	-0.68294	4.09677	-7.90591	1.49778e-14	1.3861e-13	22.2163
HAAO	-0.551658	3.5696	-7.90109	1.55067e-14	1.43424e-13	22.1822
HRH2	-0.420382	2.21844	-7.89852	1.57963e-14	1.4602e-13	22.1641
SLC2A13	-0.38795	2.91407	-7.89691	1.59807e-14	1.47641e-13	22.1527
CSF2RA	-0.77912	4.32951	-7.89178	1.65803e-14	1.53094e-13	22.1166
MAP7D1	-0.461334	6.68437	-7.8904	1.67454e-14	1.54532e-13	22.1068
APOE	-1.21894	7.7163	-7.88669	1.71985e-14	1.58625e-13	22.0806
GPR17	-0.191923	1.71311	-7.8865	1.7222e-14	1.58752e-13	22.0793
TJP3	0.88934	5.61042	7.88585	1.73024e-14	1.59404e-13	22.0747
SIT1	-0.725106	2.97103	-7.88102	1.79139e-14	1.64945e-13	22.0406
SCNN1G	1.36266	5.60755	7.87948	1.81124e-14	1.66678e-13	22.0298
RASGEF1B	-0.542451	2.92711	-7.87724	1.84062e-14	1.69288e-13	22.014
KIAA1614	-0.367468	2.41127	-7.87422	1.88097e-14	1.72901e-13	21.9928
RILPL2	-0.463078	4.89781	-7.87072	1.92877e-14	1.77197e-13	21.9681
GPER1	-0.470958	2.53785	-7.8673	1.97668e-14	1.81497e-13	21.9441
MVK	0.460309	5.36698	7.86697	1.98142e-14	1.8183e-13	21.9417
KIF17	-0.311578	2.18293	-7.8633	2.03412e-14	1.86562e-13	21.916
NUMBL	-0.479239	4.43186	-7.86285	2.04079e-14	1.87069e-13	21.9127
CYYR1	-0.531391	3.95442	-7.86111	2.06645e-14	1.89315e-13	21.9005
PTPRF	0.595691	7.56959	7.85753	2.12014e-14	1.94125e-13	21.8753
NIN	-0.411916	4.93525	-7.85549	2.15129e-14	1.96868e-13	21.861
EEPD1	-0.544338	3.78253	-7.85459	2.16517e-14	1.98028e-13	21.8547
NUAK1	-0.691374	4.39285	-7.84923	2.24991e-14	2.05663e-13	21.817
DGAT2	0.849078	5.46982	7.84838	2.26358e-14	2.06797e-13	21.8111
OSBPL5	-0.482691	4.76009	-7.84596	2.30326e-14	2.10225e-13	21.794
CYTH1	-0.413436	5.2951	-7.84593	2.30365e-14	2.10225e-13	21.7939
IP6K2	0.427896	5.94439	7.84558	2.30945e-14	2.10637e-13	21.7914
GPCPD1	-0.451117	4.85555	-7.84523	2.31522e-14	2.11045e-13	21.789
RERGL	-0.561739	2.28073	-7.8429	2.35419e-14	2.14479e-13	21.7726
CGN	0.948889	6.86756	7.83681	2.4589e-14	2.23894e-13	21.7299
PDGFRL	-0.872297	3.86952	-7.83245	2.53684e-14	2.30862e-13	21.6993
PRND	-0.384466	1.87143	-7.82809	2.61712e-14	2.38036e-13	21.6687
TMEM54	0.537848	7.67544	7.82688	2.63974e-14	2.3996e-13	21.6603
LOXL2	-0.672066	5.02058	-7.82538	2.66827e-14	2.42419e-13	21.6497
GATA3	1.07404	8.41256	7.82516	2.6724e-14	2.42661e-13	21.6482
ACOT11	0.617375	4.74828	7.82477	2.67991e-14	2.43208e-13	21.6455
IRF2BP2	-0.447452	6.55418	-7.82005	2.77179e-14	2.51407e-13	21.6124
ARNTL	-0.386299	3.23334	-7.81825	2.80763e-14	2.54517e-13	21.5998
SPIRE1	-0.669919	4.46767	-7.81658	2.84136e-14	2.57432e-13	21.5881
BLVRA	-0.596281	6.90459	-7.81641	2.84465e-14	2.57588e-13	21.5869
SYTL3	-0.564107	3.82675	-7.81567	2.85982e-14	2.58819e-13	21.5817
SGCG	-0.381796	1.88612	-7.81533	2.86677e-14	2.59306e-13	21.5793
P2RY8	-0.475462	2.66599	-7.80743	3.03292e-14	2.74183e-13	21.5241
CLEC2B	-0.899696	4.93807	-7.80447	3.09766e-14	2.79881e-13	21.5033
ZNF552	0.652254	5.40219	7.80026	3.192e-14	2.88246e-13	21.4739
NKG7	-0.961042	3.8583	-7.79993	3.19941e-14	2.88757e-13	21.4716
MMEL1	0.525463	2.8587	7.79846	3.23308e-14	2.91635e-13	21.4614
SLC24A4	-0.0946733	1.66867	-7.79798	3.24423e-14	2.9248e-13	21.458
BHLHE22	-0.405048	2.23345	-7.79701	3.26661e-14	2.94336e-13	21.4512
PSD	-0.639501	2.9367	-7.7967	3.27396e-14	2.94836e-13	21.449
CCR1	-0.733351	3.60906	-7.79547	3.30277e-14	2.97267e-13	21.4405
SEC14L1	-0.411538	5.11067	-7.79436	3.3288e-14	2.99446e-13	21.4328
CD19	-0.792782	2.54866	-7.79409	3.3353e-14	2.99867e-13	21.4308
TXNDC15	-0.349711	5.37608	-7.79313	3.35824e-14	3.01747e-13	21.4241
STAT5B	-0.345721	6.36151	-7.79306	3.35989e-14	3.01747e-13	21.4236
RAPGEF1	-0.476459	5.90173	-7.79226	3.37915e-14	3.0331e-13	21.418
DGKI	-0.311781	2.15954	-7.79166	3.39352e-14	3.04434e-13	21.4139
CCSER2	-0.409747	4.88772	-7.7889	3.46071e-14	3.10292e-13	21.3946
KLF17	-0.261384	1.8294	-7.78645	3.52171e-14	3.15588e-13	21.3775
CDC37L1	-0.393985	5.50744	-7.78442	3.57298e-14	3.20008e-13	21.3633
HHEX	-0.594292	3.86254	-7.78386	3.58711e-14	3.21099e-13	21.3594
NOD2	-0.516585	2.81521	-7.78353	3.59557e-14	3.2168e-13	21.3571
IL18BP	-0.435587	3.79996	-7.78277	3.61517e-14	3.23257e-13	21.3518
STXBP2	0.423969	7.17673	7.78181	3.63988e-14	3.25289e-13	21.3451
P2RY12	-0.420933	2.1205	-7.78007	3.68511e-14	3.29152e-13	21.333
IFI16	-0.905964	6.94454	-7.77952	3.69954e-14	3.30261e-13	21.3292
CLEC9A	-0.220724	1.87119	-7.77019	3.95327e-14	3.5272e-13	21.2641
BMX	-0.436378	2.43065	-7.76689	4.04709e-14	3.60895e-13	21.2411
TNFRSF13B	-0.516456	2.19199	-7.76497	4.10256e-14	3.65643e-13	21.2278
CCDC184	-0.38769	2.39592	-7.75619	4.36632e-14	3.88939e-13	21.1666
ROBO4	-0.458885	3.62018	-7.7517	4.50744e-14	4.01292e-13	21.1354
NRG1	-0.548048	2.24971	-7.74823	4.61965e-14	4.11058e-13	21.1113
PTP4A3	-0.557122	4.60401	-7.74716	4.65506e-14	4.13985e-13	21.1038
PCDHGC3	-0.563938	3.61166	-7.7392	4.92484e-14	4.3774e-13	21.0486
GPR4	-0.425197	3.36924	-7.73688	5.00643e-14	4.44751e-13	21.0325
VAT1L	-0.498749	2.40135	-7.73567	5.04949e-14	4.48333e-13	21.0241
EMCN	-0.532434	3.38526	-7.735	5.07371e-14	4.5024e-13	21.0194
ACVR2B	0.505448	3.75393	7.73265	5.15875e-14	4.57539e-13	21.0031
ZSCAN16	0.537721	5.46589	7.72678	5.37736e-14	4.76671e-13	20.9624
SIRPB2	-0.468032	2.45798	-7.72553	5.4254e-14	4.80669e-13	20.9537
ZHX2	-0.461347	4.84854	-7.72366	5.49749e-14	4.86794e-13	20.9407
TBX5	-0.51095	2.50351	-7.71972	5.6527e-14	5.00267e-13	20.9134
ZMYND8	0.502158	6.33559	7.71473	5.85547e-14	5.17933e-13	20.8788
HLA-DQA1	-1.0302	4.27751	-7.71403	5.8847e-14	5.20238e-13	20.874
LAMB2	-0.633857	7.21842	-7.70702	6.18347e-14	5.46357e-13	20.8254
SETX	-0.404839	6.10992	-7.70561	6.24532e-14	5.51524e-13	20.8156
GAP43	-0.605339	2.23038	-7.7054	6.25417e-14	5.52008e-13	20.8143
SLC6A9	-0.602503	3.89234	-7.70487	6.2779e-14	5.53805e-13	20.8105
OXCT1	-0.892515	4.87416	-7.70416	6.30927e-14	5.56274e-13	20.8057
LDLRAD2	-0.26123	2.18323	-7.70348	6.3395e-14	5.58639e-13	20.801
TSHZ2	-0.68751	3.48541	-7.70325	6.35019e-14	5.5928e-13	20.7993
ZNF436	0.538529	6.01414	7.70018	6.48895e-14	5.71194e-13	20.7781
PMP2	-0.268001	1.66289	-7.69908	6.53957e-14	5.75342e-13	20.7705
SEL1L2	-0.102597	1.58985	-7.699	6.54333e-14	5.75364e-13	20.7699
FGR	-0.641828	4.30814	-7.69723	6.62548e-14	5.82276e-13	20.7577
PTHLH	-0.880306	3.20389	-7.69206	6.8716e-14	6.03582e-13	20.7219
ZNF25	-0.407704	4.08363	-7.69092	6.92682e-14	6.08107e-13	20.7141
AKNA	-0.527229	4.87019	-7.69019	6.96241e-14	6.10905e-13	20.7091
RAB3C	-0.239303	1.69971	-7.69	6.97193e-14	6.11413e-13	20.7077
CC2D2A	-0.413671	3.63766	-7.68635	7.15363e-14	6.27012e-13	20.6825
GPR84	-0.519002	2.63131	-7.68142	7.40634e-14	6.48816e-13	20.6485
MAS1L	-0.209671	1.74562	-7.67855	7.55753e-14	6.61707e-13	20.6286
ILDR1	0.637175	4.99389	7.67281	7.86883e-14	6.88596e-13	20.5891
RCVRN	-0.149888	1.69406	-7.67246	7.88827e-14	6.89929e-13	20.5867
GSTO2	0.57896	4.63785	7.66786	8.14773e-14	7.12243e-13	20.5549
GLP2R	-0.367194	1.85379	-7.66565	8.27524e-14	7.23004e-13	20.5397
COL19A1	-0.404084	1.9253	-7.66537	8.29145e-14	7.24034e-13	20.5378
CGNL1	-0.715768	3.82703	-7.6643	8.35395e-14	7.29105e-13	20.5304
TPSG1	-0.254226	1.83113	-7.65843	8.70581e-14	7.59409e-13	20.49
KCNIP1	-0.199298	1.68166	-7.657	8.79395e-14	7.6669e-13	20.4801
ATP8B1	0.71883	6.61847	7.65554	8.88421e-14	7.74149e-13	20.4701
TP53INP2	-0.538707	4.66817	-7.65126	9.15558e-14	7.97371e-13	20.4406
GRAP	-0.273535	2.07178	-7.64757	9.39546e-14	8.17829e-13	20.4152
NTNG1	-0.457056	1.97365	-7.64416	9.62296e-14	8.36891e-13	20.3918
MEIS3	-0.630413	3.25745	-7.64414	9.62466e-14	8.36891e-13	20.3916
DCBLD2	-0.762223	4.72411	-7.64025	9.89091e-14	8.59587e-13	20.3648
EPM2A	-0.339629	2.9734	-7.63801	1.00472e-13	8.72707e-13	20.3495
SSBP2	-0.517205	4.05979	-7.63668	1.01415e-13	8.80437e-13	20.3403
JUP	0.613137	8.62218	7.63637	1.01631e-13	8.8184e-13	20.3382
TRIM47	-0.692716	4.93411	-7.63495	1.0265e-13	8.90211e-13	20.3285
PLA2G2D	-0.793265	2.58667	-7.63462	1.02886e-13	8.91786e-13	20.3262
CTSL	-0.753627	7.671	-7.63408	1.03277e-13	8.947e-13	20.3225
MRO	-0.222541	1.77867	-7.63338	1.03788e-13	8.98653e-13	20.3176
GRB7	0.750341	5.93108	7.62879	1.07175e-13	9.27494e-13	20.2862
NUAK2	-0.613316	3.2958	-7.62773	1.07978e-13	9.33949e-13	20.2788
ZNF440	0.655669	5.69059	7.62511	1.09972e-13	9.50694e-13	20.2609
LMO3	-0.738353	2.6553	-7.62205	1.12354e-13	9.70775e-13	20.2399
ARHGEF15	-0.454553	3.35042	-7.6198	1.14141e-13	9.857e-13	20.2244
TRIL	-0.460447	2.57632	-7.61591	1.17286e-13	1.01232e-12	20.1978
KANK3	-0.406573	3.07912	-7.61316	1.19562e-13	1.03143e-12	20.179
NFKBIA	-0.51294	9.3737	-7.61267	1.19976e-13	1.03446e-12	20.1756
AGT	-0.881558	3.74754	-7.61208	1.20467e-13	1.03814e-12	20.1716
ZNF80	-0.178656	1.76059	-7.60946	1.22694e-13	1.05678e-12	20.1536
DBN1	-0.754055	6.09547	-7.60831	1.23683e-13	1.06474e-12	20.1457
FAM3B	1.20152	5.55755	7.60795	1.23995e-13	1.06687e-12	20.1433
ENOX1	-0.578839	2.9888	-7.60751	1.24384e-13	1.06965e-12	20.1402
GOLT1A	0.901371	5.16745	7.6068	1.24997e-13	1.07436e-12	20.1354
NAALADL1	-0.481878	2.69695	-7.60216	1.2912e-13	1.10922e-12	20.1036
UPK1A	1.91016	7.78902	7.59897	1.32028e-13	1.13361e-12	20.0817
KCNAB2	-0.530773	3.4839	-7.59232	1.383e-13	1.18683e-12	20.0363
GREB1	-0.403554	2.20355	-7.59182	1.38785e-13	1.19037e-12	20.0328
SCARF1	-0.344991	3.2628	-7.58797	1.4256e-13	1.22211e-12	20.0065
NADSYN1	0.559324	6.97027	7.58696	1.43572e-13	1.23015e-12	19.9996
GCNT1	-0.73329	3.20794	-7.58345	1.47124e-13	1.25992e-12	19.9756
B4GALNT1	-0.568358	2.32581	-7.58163	1.48999e-13	1.27531e-12	19.9632
ENG	-0.521594	6.92075	-7.57917	1.51579e-13	1.29672e-12	19.9464
TMEM108	-0.492101	2.22694	-7.57782	1.5301e-13	1.30828e-12	19.9372
CEACAM3	-0.253862	1.85273	-7.57699	1.53898e-13	1.31519e-12	19.9315
OSTM1	-0.429671	5.05996	-7.56949	1.62148e-13	1.38497e-12	19.8803
NIPAL1	0.874769	5.46967	7.56847	1.63303e-13	1.39411e-12	19.8734
ECE1	-0.438861	6.3232	-7.56614	1.65973e-13	1.41617e-12	19.8575
KCNK2	-0.38306	1.93424	-7.56599	1.66154e-13	1.41697e-12	19.8564
HLA-DQB1	-1.0859	5.47747	-7.56361	1.68923e-13	1.43984e-12	19.8402
CNTN4	-0.392373	2.54383	-7.55584	1.78299e-13	1.51897e-12	19.7873
ZHX3	-0.355051	3.62511	-7.55509	1.79234e-13	1.52614e-12	19.7821
FOXO1	-0.517903	5.09059	-7.55085	1.8459e-13	1.57093e-12	19.7533
PTGIR	-0.357034	2.40309	-7.54936	1.8651e-13	1.58645e-12	19.7432
VASH1	-0.492863	4.09939	-7.54682	1.8984e-13	1.61393e-12	19.7258
CLC	-0.605477	2.20687	-7.54664	1.90067e-13	1.61503e-12	19.7246
CXCL1	-1.2032	4.76683	-7.5461	1.90787e-13	1.62031e-12	19.7209
ACACB	-0.578659	4.00607	-7.54529	1.91856e-13	1.62855e-12	19.7155
GCSAML	-0.199091	1.74039	-7.54479	1.92529e-13	1.63341e-12	19.712
MYH3	-0.616061	3.36534	-7.54241	1.95736e-13	1.65976e-12	19.6958
JAK1	-0.432584	6.85711	-7.54175	1.96633e-13	1.66651e-12	19.6914
HOMEZ	0.432542	4.99949	7.53935	1.99937e-13	1.69345e-12	19.675
CXCR3	-0.585395	2.58078	-7.53929	2.00018e-13	1.69345e-12	19.6746
VSTM1	-0.20242	1.68605	-7.53666	2.03711e-13	1.72382e-12	19.6567
LYL1	-0.438206	3.03155	-7.53554	2.05294e-13	1.73632e-12	19.6491
SLC39A8	-0.601925	3.99277	-7.53531	2.05629e-13	1.73826e-12	19.6475
CIDEC	-0.582266	2.0894	-7.53459	2.06651e-13	1.746e-12	19.6427
THRA	-0.477324	4.52212	-7.53448	2.06803e-13	1.74638e-12	19.6419
STRN3	-0.387439	5.50213	-7.53413	2.07311e-13	1.74977e-12	19.6395
BMP6	-0.572237	3.16897	-7.52938	2.14249e-13	1.8074e-12	19.6073
FOXP2	-0.504361	2.46577	-7.52724	2.17451e-13	1.83347e-12	19.5927
MAP4K4	-0.509305	5.95343	-7.52715	2.17591e-13	1.83371e-12	19.5921
RAB9B	-0.497459	2.6911	-7.52235	2.24951e-13	1.89476e-12	19.5595
CD163L1	-0.565142	2.96658	-7.51561	2.3569e-13	1.9842e-12	19.5138
IL17B	-0.238562	1.969	-7.51206	2.41566e-13	2.03262e-12	19.4897
ETS2	-0.615082	7.48243	-7.50655	2.50948e-13	2.11045e-12	19.4524
CD68	-0.524947	5.02283	-7.50648	2.51073e-13	2.11045e-12	19.4519
LCK	-0.6938	3.82494	-7.50418	2.55086e-13	2.14309e-12	19.4363
IL11RA	-0.50583	4.34166	-7.50094	2.60868e-13	2.19054e-12	19.4144
UBE2F	-0.364103	5.44875	-7.50065	2.61393e-13	2.19383e-12	19.4124
PRTFDC1	-0.758625	3.88726	-7.50053	2.61616e-13	2.19458e-12	19.4116
FZD7	-0.615276	4.58682	-7.49994	2.62679e-13	2.20237e-12	19.4076
SCN4B	-0.472868	2.82215	-7.49663	2.68749e-13	2.25211e-12	19.3852
KCTD9	-0.420543	4.64558	-7.49442	2.7289e-13	2.28564e-12	19.3702
STX1B	-0.287473	1.91381	-7.48919	2.82928e-13	2.36851e-12	19.3348
DENND1C	-0.464075	3.72788	-7.48444	2.92359e-13	2.44621e-12	19.3027
CLEC7A	-0.713005	3.41647	-7.48362	2.94014e-13	2.45881e-12	19.2972
NCR1	-0.349344	2.11934	-7.48036	3.00704e-13	2.51348e-12	19.2752
TNFRSF19	-0.841799	2.98994	-7.47746	3.06789e-13	2.56303e-12	19.2555
DNASE1L2	0.436132	2.76681	7.4772	3.07339e-13	2.56632e-12	19.2538
STARD4	-0.510927	2.93244	-7.47619	3.09474e-13	2.58283e-12	19.247
ELMO3	0.707114	6.24395	7.47476	3.12548e-13	2.60716e-12	19.2373
PLEKHA6	0.579207	5.05556	7.47053	3.21779e-13	2.6828e-12	19.2088
ST6GALNAC4	-0.491908	4.54457	-7.46932	3.24488e-13	2.70401e-12	19.2006
AK1	-0.529367	4.24927	-7.46687	3.29996e-13	2.74852e-12	19.1841
VAV1	-0.671186	3.9968	-7.46391	3.36807e-13	2.80382e-12	19.1641
RAB11A	0.380739	7.84626	7.46236	3.40421e-13	2.83247e-12	19.1536
CD300LG	-0.188922	1.68264	-7.45886	3.48724e-13	2.90008e-12	19.13
PNRC1	-0.454817	6.60489	-7.45657	3.54248e-13	2.94453e-12	19.1146
CKMT1B	0.749401	4.10116	7.45268	3.63871e-13	3.02299e-12	19.0884
FCRL1	-0.466848	1.98165	-7.44935	3.72292e-13	3.09138e-12	19.066
CYP4B1	1.53624	7.2839	7.44879	3.73718e-13	3.10165e-12	19.0622
RBMS2	-0.40477	4.14214	-7.44617	3.80524e-13	3.15654e-12	19.0445
PDE1B	-0.615753	2.6226	-7.44406	3.86072e-13	3.20094e-12	19.0304
SLCO1C1	-0.174917	1.74996	-7.44112	3.93943e-13	3.26455e-12	19.0106
SECTM1	-0.90581	4.14498	-7.44094	3.94448e-13	3.26709e-12	19.0093
EVL	-0.554744	6.0679	-7.44069	3.95123e-13	3.27103e-12	19.0077
FGFR3	1.36126	7.20112	7.43956	3.98196e-13	3.29481e-12	19.0001
SNRK	-0.372779	5.23454	-7.4393	3.98902e-13	3.29899e-12	18.9983
SLC39A4	0.475712	5.03973	7.43859	4.00865e-13	3.31355e-12	18.9935
ELOVL5	-0.639762	5.7432	-7.43678	4.05879e-13	3.35291e-12	18.9813
TH	1.05585	3.37931	7.43672	4.06036e-13	3.35291e-12	18.981
CDIP1	-0.678142	3.76989	-7.43664	4.06266e-13	3.35312e-12	18.9804
SYPL2	-0.35922	2.04971	-7.4362	4.07475e-13	3.36141e-12	18.9775
CERCAM	-0.736455	5.56902	-7.43503	4.1076e-13	3.38681e-12	18.9696
BLK	-0.649441	2.29111	-7.43333	4.15581e-13	3.42484e-12	18.9582
IL1R2	-0.676386	3.02823	-7.43302	4.16466e-13	3.43041e-12	18.9561
TBX21	-0.456647	2.32308	-7.42351	4.44565e-13	3.66002e-12	18.8922
SLC19A3	-0.468053	2.20185	-7.42185	4.49652e-13	3.70004e-12	18.881
FCRL5	-0.592915	2.40255	-7.42113	4.51866e-13	3.7164e-12	18.8762
CDK17	-0.34556	4.56823	-7.42099	4.52301e-13	3.71811e-12	18.8753
CKMT2	-0.421712	2.37194	-7.41516	4.7073e-13	3.86767e-12	18.8362
CDH2	-0.838697	3.11131	-7.41351	4.76087e-13	3.90973e-12	18.8251
SIGLEC12	-0.497161	2.33269	-7.41283	4.78316e-13	3.92607e-12	18.8205
[truncated: 14,409 more rows]
