# Supplementary material for: A Novel m7G-Related Genes-Based Signature with Prognostic Value and Predictive Ability to Select Patients Responsive to Personalized Treatment Strategies in Bladder Cancer
Source: Cancers (Basel). 2022 Oct 29;14(21):5346. doi: 10.3390/cancers14215346 (PMC9656096; doi:10.3390/cancers14215346)
Supplement: Supplementary file 1 [file cancers-14-05346-s001.zip › Table S5.xlsx]

## Sheet: 337 VS 218差异表达基因
genesymbol	logFC	AveExpr	t	P.Value	adj.P.Val	B
MYC	-2.16322	6.72387	-22.1512	2.2504e-78	3.69246e-74	167.613
PPFIBP2	1.83681	6.50432	19.329	4.94337e-64	4.05554e-60	134.904
VSIG2	3.22982	7.30439	18.7767	2.91352e-61	1.5935e-57	128.585
HID1	1.91963	5.39547	17.9115	5.85369e-57	2.40119e-53	118.769
CAPN5	1.94252	6.05821	17.5001	6.24346e-55	2.04885e-51	114.143
TLE2	1.7909	5.11168	17.3009	5.92635e-54	1.62066e-50	111.913
FAM3B	2.63437	4.97723	17.0909	6.2994e-53	1.47658e-49	109.572
SPINK1	4.60311	8.44014	16.9772	2.25781e-52	4.63076e-49	108.307
CD109	-1.83392	4.05793	-16.787	1.8963e-51	3.45717e-48	106.199
UPK1A	3.77374	7.0292	16.5697	2.1384e-50	3.50869e-47	103.799
UPK3A	3.435	5.63	16.3267	3.17249e-49	4.73219e-46	101.127
KRT6B	-3.99889	4.1488	-16.316	3.57307e-49	4.88558e-46	101.009
UPK2	3.78358	7.88128	16.2121	1.12623e-48	1.42148e-45	99.8721
FBP1	2.07636	7.58749	16.1972	1.32862e-48	1.55714e-45	99.7084
FAM174B	1.96855	6.37618	16.1884	1.46273e-48	1.59261e-45	99.6132
VIPR1	1.64317	4.55461	16.183	1.553e-48	1.59261e-45	99.5539
RGS20	-1.19486	2.4885	-16.1392	2.5195e-48	2.43176e-45	99.0746
CORO1C	-1.02017	6.76159	-16.0188	9.47591e-48	8.63782e-45	97.7624
SLC16A1	-1.93311	4.86765	-15.9546	1.92027e-47	1.65831e-44	97.0628
FOSL1	-1.46672	4.74891	-15.882	4.25956e-47	3.49454e-44	96.2736
FGFBP1	-2.9555	4.14193	-15.8136	9.00761e-47	7.03795e-44	95.5319
TBX2	2.13718	6.26317	15.7276	2.30547e-46	1.71946e-43	94.601
TUBB6	-1.81963	5.83588	-15.6886	3.53159e-46	2.51941e-43	94.1786
TEAD4	-1.38588	4.8796	-15.6731	4.18244e-46	2.85939e-43	94.0111
SCUBE2	2.35152	4.96689	15.6446	5.70481e-46	3.74418e-43	93.7036
HMGCS2	3.70504	6.63799	15.5089	2.499e-45	1.57706e-42	92.2406
TMPRSS2	2.37541	5.57055	15.4957	2.88255e-45	1.75173e-42	92.0992
RAB15	1.49057	6.19	15.4633	4.09898e-45	2.402e-42	91.7505
DSG3	-3.21759	3.7545	-15.4491	4.78201e-45	2.70563e-42	91.5978
PTHLH	-2.30364	3.77578	-15.3094	2.16895e-44	1.18627e-41	90.1004
F3	-1.99857	5.30668	-15.2673	3.41957e-44	1.80994e-41	89.6495
PRNP	-1.5504	8.11943	-15.2256	5.36361e-44	2.75019e-41	89.2037
CYFIP2	1.12824	4.67303	15.1749	9.2611e-44	4.60473e-41	88.6628
BNC1	-1.92901	2.55674	-15.1693	9.83705e-44	4.74724e-41	88.6031
SUOX	0.889665	6.06036	15.1666	1.01278e-43	4.74792e-41	88.5742
GPR160	1.59549	4.59304	15.1614	1.07099e-43	4.88134e-41	88.5189
PLAUR	-1.35265	5.02381	-15.1462	1.26112e-43	5.59255e-41	88.357
CCNB1	-1.12704	6.9663	-15.1152	1.76149e-43	7.60594e-41	88.0261
MTHFD1L	-0.958652	5.58532	-15.0664	2.97402e-43	1.25122e-40	87.5074
AHNAK2	-2.18519	4.54302	-15.0477	3.63485e-43	1.49101e-40	87.3087
BEND5	1.25937	3.63646	15.0313	4.33485e-43	1.73479e-40	87.1343
LDHA	-1.18197	9.45422	-15.0045	5.7807e-43	2.25833e-40	86.8493
DLGAP5	-1.22764	5.53447	-14.9426	1.12168e-42	4.28012e-40	86.1928
LYAR	-0.757477	6.05345	-14.9288	1.30062e-42	4.85012e-40	86.0462
BCAS1	2.41162	5.51653	14.8799	2.1944e-42	8.00126e-40	85.5283
ICA1	1.28393	6.25329	14.856	2.83224e-42	1.01025e-39	85.2756
DEGS2	1.61189	3.87561	14.8184	4.23108e-42	1.4771e-39	84.8781
CENPW	-1.10701	5.76863	-14.7961	5.36252e-42	1.83309e-39	84.6435
CDC25B	-1.26445	6.17046	-14.7819	6.24228e-42	2.07297e-39	84.493
ANLN	-1.29348	6.06782	-14.7808	6.31695e-42	2.07297e-39	84.4813
OSMR	-1.5161	4.91405	-14.7092	1.35235e-41	4.35086e-39	83.7275
GGT6	1.95872	5.68337	14.7002	1.48818e-41	4.69579e-39	83.6328
MT2A	-2.17964	8.36024	-14.6983	1.51959e-41	4.70443e-39	83.6121
REEP6	1.73834	6.00103	14.6415	2.77641e-41	8.43618e-39	83.0153
CYP4F12	2.10691	4.94562	14.5964	4.47705e-41	1.31829e-38	82.5422
SNCG	2.38334	8.0768	14.596	4.4993e-41	1.31829e-38	82.5373
ZNF763	0.787578	4.25402	14.5836	5.12938e-41	1.47654e-38	82.4075
ANXA1	-1.93208	8.64697	-14.5679	6.05778e-41	1.71372e-38	82.2428
DHRS2	3.20283	7.52457	14.5615	6.47884e-41	1.80178e-38	82.1762
CYP4B1	2.91539	6.7198	14.5595	6.62209e-41	1.81092e-38	82.1546
RBBP8NL	1.37773	4.47438	14.5455	7.67878e-41	2.06546e-38	82.008
FAM126A	-0.915995	3.54051	-14.5127	1.0867e-40	2.8759e-38	81.6641
PLEKHA6	1.22903	4.79188	14.5046	1.18343e-40	3.08218e-38	81.5797
ANXA2	-1.13154	8.73835	-14.4922	1.34902e-40	3.45856e-38	81.45
TBX3	2.01576	7.22711	14.4784	1.55997e-40	3.93785e-38	81.3062
CDK6	-1.38682	3.72808	-14.4567	1.96236e-40	4.87854e-38	81.079
RALGPS1	0.962782	4.02826	14.4006	3.54613e-40	8.68431e-38	80.4931
ZNF552	1.12974	5.20514	14.3919	3.88531e-40	9.37503e-38	80.4027
ERICH5	1.56881	3.91159	14.3716	4.81002e-40	1.13777e-37	80.1913
PSCA	3.40652	8.45452	14.3707	4.85397e-40	1.13777e-37	80.1823
ADCY7	-1.02409	3.36598	-14.3686	4.96428e-40	1.14724e-37	80.1601
CAV1	-1.59816	6.14587	-14.3652	5.14767e-40	1.1731e-37	80.1241
KRT14	-3.96905	6.20602	-14.3492	6.09103e-40	1.36906e-37	79.9575
LRP8	-1.05606	3.77715	-14.3385	6.81356e-40	1.49411e-37	79.8466
PIK3C2B	1.06291	5.20441	14.3383	6.82949e-40	1.49411e-37	79.8442
SLC7A5	-1.55626	7.54246	-14.29	1.13398e-39	2.4482e-37	79.3422
ZNF69	1.18412	5.16725	14.2542	1.65053e-39	3.51712e-37	78.9706
HBEGF	-1.19419	4.90496	-14.213	2.5434e-39	5.35027e-37	78.5425
SH3GLB2	0.89335	6.98256	14.1895	3.25165e-39	6.75356e-37	78.2993
CPA4	-1.87879	3.09312	-14.1633	4.27783e-39	8.77383e-37	78.0278
KRT6C	-2.81555	3.21408	-14.1435	5.25862e-39	1.06523e-36	77.8234
MSN	-1.4534	7.40654	-14.1329	5.87385e-39	1.17534e-36	77.7139
TUBA1C	-0.826274	9.08055	-14.1056	7.81334e-39	1.54459e-36	77.4314
DDX21	-0.948243	7.13858	-14.1017	8.13297e-39	1.58864e-36	77.3917
IL1RAP	-1.1628	3.85285	-14.0929	8.919e-39	1.72168e-36	77.3004
CDKN3	-1.13953	5.33079	-14.072	1.10968e-38	2.11716e-36	77.0841
FSCN1	-1.48577	8.12362	-14.0669	1.16989e-38	2.20639e-36	77.0318
GOLT1A	1.67499	4.85045	14.0522	1.36293e-38	2.54124e-36	76.8806
MTHFD2	-1.19937	6.0115	-14.0093	2.13005e-38	3.92695e-36	76.4386
TTC21A	0.728394	3.44124	13.975	3.04288e-38	5.5475e-36	76.0855
TMC4	1.25022	6.02145	13.9725	3.12297e-38	5.63095e-36	76.0598
ENO1	-0.791412	11.0369	-13.9691	3.23656e-38	5.77234e-36	76.0245
GATA3	2.01041	8.02912	13.9594	3.57852e-38	6.31358e-36	75.925
IGF2BP2	-1.87997	4.36023	-13.9559	3.70983e-38	6.47562e-36	75.8894
SARM1	0.771416	3.32108	13.9301	4.85125e-38	8.37887e-36	75.6238
TRAK1	1.08306	6.63252	13.9225	5.24626e-38	8.96673e-36	75.5463
PNP	-0.812441	6.60674	-13.9193	5.42571e-38	9.17785e-36	75.513
TNC	-1.91717	5.21845	-13.8988	6.71121e-38	1.12365e-35	75.3026
IPPK	-0.814659	3.71017	-13.8888	7.43933e-38	1.23297e-35	75.2006
NEIL3	-0.939283	3.64593	-13.8787	8.26384e-38	1.35593e-35	75.0966
SPHK1	-1.42454	3.89189	-13.8748	8.60047e-38	1.39719e-35	75.057
YPEL3	0.896563	6.68565	13.8318	1.34303e-37	2.16044e-35	74.6159
CMSS1	-0.763206	5.63879	-13.8265	1.41842e-37	2.25955e-35	74.5618
TM7SF2	1.28931	5.92274	13.8131	1.62863e-37	2.56948e-35	74.425
CCNA2	-1.08356	6.14996	-13.8064	1.74507e-37	2.72696e-35	74.3567
KLHDC7A	1.68951	3.62915	13.7818	2.25018e-37	3.48311e-35	74.105
TGFBR3	1.37801	5.6196	13.7777	2.3478e-37	3.60025e-35	74.063
CEP55	-1.14057	5.65873	-13.7767	2.37271e-37	3.60476e-35	74.0526
SNAI2	-1.55079	5.77942	-13.7725	2.47686e-37	3.72848e-35	74.01
MYCL	1.74951	5.9255	13.6559	8.22567e-37	1.22697e-34	72.822
SNX31	2.64225	5.62828	13.6426	9.43702e-37	1.39498e-34	72.6861
PTTG1	-1.08832	6.81638	-13.6211	1.17651e-36	1.72358e-34	72.4678
CLCF1	-1.13125	3.98673	-13.6174	1.22167e-36	1.7739e-34	72.4306
MT1X	-1.8348	6.75249	-13.6027	1.4202e-36	2.04409e-34	72.2815
TJP3	1.54294	5.34074	13.5761	1.86514e-36	2.66115e-34	72.0118
PPARG	1.89318	7.49186	13.564	2.11229e-36	2.9878e-34	71.8886
PGPEP1	0.770568	3.98656	13.5343	2.86309e-36	4.01518e-34	71.5876
LMNB2	-0.79661	7.39812	-13.5289	3.02672e-36	4.20867e-34	71.5326
CRACR2B	1.3857	4.71071	13.5167	3.4273e-36	4.72564e-34	71.4096
MAGI1	0.892005	3.99387	13.5148	3.49623e-36	4.78051e-34	71.3899
METTL7A	1.64886	6.4379	13.5092	3.70221e-36	5.02032e-34	71.3332
CDH23	1.14865	3.02021	13.5024	3.96571e-36	5.33356e-34	71.2652
MYO1B	-1.15861	5.85924	-13.4526	6.59305e-36	8.79502e-34	70.7621
ZNF823	0.93313	5.18436	13.4362	7.79559e-36	1.03153e-33	70.5963
SERPINB1	-1.33931	6.50216	-13.4284	8.43929e-36	1.10778e-33	70.5178
AURKA	-1.05555	6.31537	-13.4075	1.04485e-35	1.36063e-33	70.3065
TMEM45A	-1.98526	5.11726	-13.3854	1.30768e-35	1.68948e-33	70.0844
CAPS	1.62328	6.24848	13.3772	1.4215e-35	1.82219e-33	70.0018
CGN	1.54444	6.61982	13.3484	1.90532e-35	2.42344e-33	69.7119
SLC14A1	2.52209	5.72016	13.3435	2.00285e-35	2.5279e-33	69.6625
CDCA4	-0.771503	5.36056	-13.3064	2.91743e-35	3.65414e-33	69.2903
SERPINB4	-2.50761	3.66276	-13.2896	3.46194e-35	4.3033e-33	69.121
CACNA1D	1.26586	3.3516	13.2714	4.16132e-35	5.13376e-33	68.9389
SCNN1B	2.24607	6.09097	13.2671	4.3476e-35	5.32354e-33	68.8956
EHBP1	-0.75749	5.61504	-13.2589	4.72219e-35	5.73938e-33	68.8138
ACSF2	1.23122	6.29824	13.2518	5.07587e-35	6.12389e-33	68.7423
SERPINB2	-2.05592	3.23423	-13.2491	5.21731e-35	6.24858e-33	68.7151
IL20RB	-1.98455	4.14584	-13.2335	6.10463e-35	7.25831e-33	68.5597
GNB4	-1.10289	3.7684	-13.2261	6.58215e-35	7.76978e-33	68.4852
POLR3G	-0.763634	2.74139	-13.2237	6.74095e-35	7.90039e-33	68.4616
SCNN1G	2.1015	5.29749	13.2158	7.30726e-35	8.50337e-33	68.3818
CNGA1	1.58569	4.38769	13.2024	8.36599e-35	9.66685e-33	68.2479
SORL1	1.5049	5.9759	13.1981	8.7347e-35	1.00223e-32	68.2052
SMIM6	0.99785	2.83854	13.1746	1.10686e-34	1.2612e-32	67.9709
PI3	-3.4685	5.66315	-13.1727	1.12936e-34	1.27796e-32	67.951
IFT140	0.891493	4.85834	13.1703	1.15606e-34	1.29922e-32	67.9278
AMD1	-0.702355	5.84991	-13.1464	1.47131e-34	1.64227e-32	67.6892
ACBD4	0.743166	4.29148	13.1398	1.57347e-34	1.74443e-32	67.6228
ACP6	0.95771	5.24537	13.1373	1.61356e-34	1.77687e-32	67.5979
PALM3	2.09535	4.7472	13.1359	1.63669e-34	1.79032e-32	67.5838
ASPM	-1.10362	5.414	-13.0811	2.84003e-34	3.08604e-32	67.0385
GDF7	0.918234	2.62029	13.0749	3.02302e-34	3.26327e-32	66.9767
HMGA2	-1.28039	2.36935	-13.0565	3.63676e-34	3.90013e-32	66.7939
IL15RA	-1.09124	3.9024	-13.0512	3.83558e-34	4.08663e-32	66.7412
EMP1	-1.33126	6.33738	-12.9877	7.2496e-34	7.67428e-32	66.1113
LDLR	-1.31646	5.80948	-12.9854	7.42066e-34	7.80502e-32	66.0882
BCAT2	1.12677	7.12131	12.9737	8.34472e-34	8.72103e-32	65.9721
YBX3	-0.728795	7.88482	-12.9615	9.43063e-34	9.79353e-32	65.8511
NFIL3	-0.923799	5.38718	-12.9578	9.78713e-34	1.00998e-31	65.8144
SERPINB13	-2.06	3.17179	-12.9536	1.02058e-33	1.04661e-31	65.7729
ME1	-1.193	4.62226	-12.9466	1.09475e-33	1.11569e-31	65.7035
PPP1R3C	1.89496	5.76877	12.8993	1.75575e-33	1.77829e-31	65.2362
PARVB	-1.05077	4.23936	-12.8937	1.85753e-33	1.86984e-31	65.1805
MPP3	-0.704534	2.75598	-12.8689	2.377e-33	2.37816e-31	64.9365
CAV2	-1.20255	4.91496	-12.8358	3.3064e-33	3.28796e-31	64.61
SLC9A2	1.62185	4.30327	12.8136	4.12417e-33	4.07647e-31	64.3914
TYMP	-1.63528	6.4482	-12.8123	4.17773e-33	4.10469e-31	64.3786
DIAPH3	-0.882193	4.23499	-12.8032	4.5735e-33	4.46679e-31	64.2891
RHOU	1.53351	6.34847	12.7825	5.61806e-33	5.4545e-31	64.0856
HMMR	-1.03369	5.04605	-12.7746	6.07783e-33	5.86618e-31	64.0078
NCAPG	-1.0212	4.92983	-12.7721	6.22962e-33	5.97752e-31	63.9834
TEKT5	0.957383	2.61163	12.7514	7.64817e-33	7.29599e-31	63.7804
KIF11	-0.929834	5.63599	-12.7252	9.91795e-33	9.40657e-31	63.5234
DUSP7	-1.09137	5.09619	-12.7178	1.06765e-32	1.00678e-30	63.4505
ITPRIP	-0.817502	4.30351	-12.6846	1.48313e-32	1.39059e-30	63.1253
BAMBI	1.91683	6.91462	12.6694	1.72367e-32	1.60693e-30	62.9766
SLC44A4	2.17724	5.7861	12.6495	2.09888e-32	1.94568e-30	62.7818
TOX3	2.04822	4.11405	12.644	2.21498e-32	2.04176e-30	62.7286
SAMD10	0.793155	4.52774	12.6006	3.40084e-32	3.11737e-30	62.3045
NOD2	-1.03498	3.02635	-12.5985	3.47207e-32	3.16498e-30	62.284
CDC20	-1.24297	7.47283	-12.5952	3.58521e-32	3.23401e-30	62.2522
PPP1R9A	1.2056	3.57073	12.5952	3.58721e-32	3.23401e-30	62.2517
THEM6	1.04975	6.53589	12.5829	4.04889e-32	3.63028e-30	62.1319
FMO5	0.896041	3.06178	12.5817	4.09714e-32	3.65358e-30	62.1202
FAM83D	-1.097	6.00244	-12.5677	4.7014e-32	4.16976e-30	61.9842
TREM1	-1.22343	3.01282	-12.5561	5.27029e-32	4.64919e-30	61.8712
ORMDL3	0.748671	6.63075	12.5518	5.49559e-32	4.82202e-30	61.8298
CHAC2	-0.701466	3.78148	-12.5385	6.26798e-32	5.47048e-30	61.6997
FUCA1	0.975456	7.82839	12.53	6.81108e-32	5.91302e-30	61.6175
GBP6	-1.5859	3.17937	-12.5277	6.9702e-32	6.01932e-30	61.5947
ATP1B3	-0.789346	8.22042	-12.5188	7.60599e-32	6.51241e-30	61.5083
SLC29A3	1.03805	6.03045	12.5186	7.62057e-32	6.51241e-30	61.5064
ZNF737	1.54814	4.87335	12.4954	9.56851e-32	8.13472e-30	61.2813
RHBG	1.43898	3.36541	12.488	1.02922e-31	8.70483e-30	61.2092
FKBP5	-1.20138	4.48948	-12.483	1.08081e-31	9.09432e-30	61.1608
GSDMC	-1.73699	3.73456	-12.4729	1.19323e-31	9.98906e-30	61.063
ARHGEF10L	0.815334	5.35726	12.4412	1.62775e-31	1.35574e-29	60.7559
PLIN4	1.44008	4.38168	12.4394	1.65574e-31	1.37209e-29	60.739
SIGIRR	0.796071	5.31019	12.4359	1.71435e-31	1.41352e-29	60.7046
SHCBP1	-0.846354	4.51879	-12.426	1.88817e-31	1.54906e-29	60.6091
SERPINB3	-2.94214	4.68073	-12.4219	1.96669e-31	1.60545e-29	60.5688
ZSCAN16	0.831362	5.34272	12.4106	2.19556e-31	1.78341e-29	60.4599
ORC1	-0.899809	4.91925	-12.4066	2.28348e-31	1.84568e-29	60.4211
ZNF91	0.987324	5.5918	12.4045	2.33029e-31	1.87428e-29	60.401
EMX2	1.56432	3.23493	12.3976	2.4925e-31	1.99497e-29	60.3345
FMNL2	-1.07443	4.63428	-12.373	3.16972e-31	2.5247e-29	60.0968
FGD3	1.10801	5.55391	12.3625	3.51063e-31	2.78272e-29	59.9957
TPD52L1	-1.08338	4.22348	-12.3533	3.84231e-31	3.03099e-29	59.9065
MELK	-1.1102	5.52235	-12.3434	4.23079e-31	3.32148e-29	59.8112
PHLDA1	-1.30192	5.89652	-12.3311	4.76862e-31	3.72588e-29	59.6929
NEIL1	0.796397	3.78678	12.3254	5.04253e-31	3.92122e-29	59.6376
GPRC5C	1.34354	4.77204	12.313	5.68696e-31	4.40149e-29	59.5187
ENGASE	0.819923	4.99892	12.3102	5.8453e-31	4.5028e-29	59.4916
S100A10	-1.47541	9.07677	-12.3083	5.95624e-31	4.56682e-29	59.473
ZNF433	0.709792	4.2528	12.3073	6.01235e-31	4.5884e-29	59.4637
ACTN1	-1.03305	7.44431	-12.3004	6.42859e-31	4.88334e-29	59.3975
ARSI	-1.16536	2.80872	-12.2984	6.55841e-31	4.95901e-29	59.3777
ELF5	1.4322	4.03367	12.297	6.64466e-31	5.00117e-29	59.3648
CYB5A	1.19831	7.18347	12.2936	6.87045e-31	5.1475e-29	59.3318
ZNF440	0.934666	5.57146	12.2855	7.43277e-31	5.54349e-29	59.254
PPM1H	1.24077	4.20829	12.2828	7.63393e-31	5.66776e-29	59.2276
CCL3	-1.3215	3.90688	-12.2815	7.72718e-31	5.71115e-29	59.2156
CENPN	-0.84276	4.97701	-12.2619	9.34608e-31	6.8767e-29	59.0275
OVGP1	1.15138	4.08541	12.2549	1.00059e-30	7.3293e-29	58.96
PTP4A1	-0.860042	5.87098	-12.2542	1.00767e-30	7.34437e-29	58.953
PITPNB	-0.527441	6.91428	-12.2538	1.0116e-30	7.34437e-29	58.9492
EXT1	-0.903254	6.58008	-12.2505	1.04428e-30	7.54829e-29	58.9177
MSANTD3	-0.675037	4.81651	-12.2445	1.10658e-30	7.96349e-29	58.8604
DSC2	-1.77185	5.11012	-12.2401	1.1555e-30	8.27925e-29	58.8177
ZNF439	1.06794	4.62015	12.2327	1.2419e-30	8.85962e-29	58.7464
LYRM9	0.571411	3.0321	12.2316	1.25492e-30	8.91371e-29	58.7361
LIPE	0.857355	3.61042	12.2221	1.37545e-30	9.72777e-29	58.6454
CHST15	-1.23641	3.72822	-12.2206	1.39558e-30	9.82775e-29	58.631
FAM3D	1.92859	4.26388	12.2104	1.54139e-30	1.08081e-28	58.5327
TRIP13	-1.07949	5.55084	-12.2067	1.59736e-30	1.1153e-28	58.4975
KIF14	-0.878245	4.45015	-12.1861	1.95025e-30	1.35592e-28	58.3001
STK17A	-0.79421	4.92365	-12.1752	2.16605e-30	1.4996e-28	58.1963
SLC7A1	-0.991129	5.9497	-12.1742	2.18718e-30	1.50787e-28	58.1867
IL6	-1.25524	3.00373	-12.1735	2.20156e-30	1.51143e-28	58.1803
PLK2	-1.07107	5.68174	-12.1724	2.22542e-30	1.52145e-28	58.1696
BOP1	-0.708872	7.50417	-12.1696	2.28736e-30	1.5573e-28	58.1425
KIF23	-0.880902	5.00697	-12.1589	2.53573e-30	1.71927e-28	58.0405
CENPE	-0.850968	4.83942	-12.153	2.68446e-30	1.81262e-28	57.9842
ITGA5	-1.21385	6.13275	-12.1325	3.27366e-30	2.2014e-28	57.788
PSMD14	-0.588887	6.79685	-12.117	3.80151e-30	2.54593e-28	57.6402
VSNL1	-1.58229	3.03713	-12.109	4.10723e-30	2.73949e-28	57.5637
NPC1	-0.720048	5.60109	-12.0921	4.83069e-30	3.20899e-28	57.4033
TPX2	-1.15117	7.05346	-12.0912	4.87669e-30	3.22648e-28	57.3939
NR3C1	-0.914372	4.40592	-12.0837	5.2399e-30	3.45286e-28	57.3229
CKAP2L	-0.963622	4.87042	-12.0593	6.62374e-30	4.34729e-28	57.0912
ZNF816	0.820971	5.70091	12.0511	7.16906e-30	4.68645e-28	57.013
SHROOM1	1.06786	4.86255	12.0408	7.91732e-30	5.15505e-28	56.9148
RACGAP1	-0.812938	5.76313	-12.0318	8.63222e-30	5.59832e-28	56.8293
ZFHX2	0.642287	2.7309	12.0037	1.13092e-29	7.30556e-28	56.5623
PLK1	-0.92389	5.66834	-12.0028	1.14056e-29	7.33893e-28	56.5539
IER3	-1.11384	6.8158	-11.9983	1.19018e-29	7.6004e-28	56.5118
COLGALT1	-0.706421	7.48258	-11.9983	1.19046e-29	7.6004e-28	56.5116
ADA	-1.21082	5.01455	-11.9946	1.23326e-29	7.84315e-28	56.4766
OR13A1	0.891296	2.70831	11.9906	1.28219e-29	8.12286e-28	56.4382
NCF2	-1.20575	4.45566	-11.9772	1.45797e-29	9.20088e-28	56.3112
BICD2	-0.711306	5.85997	-11.9763	1.47035e-29	9.24348e-28	56.3028
NCL	-0.605785	8.88733	-11.9744	1.49759e-29	9.37877e-28	56.2847
RNF217	-0.893321	3.16452	-11.9724	1.52599e-29	9.52032e-28	56.2661
PHF19	-0.861615	4.36165	-11.9667	1.6124e-29	1.00213e-27	56.2116
CCT4	-0.613711	7.86862	-11.9653	1.63289e-29	1.01104e-27	56.1992
FOXA1	1.82061	7.1474	11.9515	1.86458e-29	1.15015e-27	56.068
LDLRAD3	-0.910118	3.69197	-11.9506	1.88031e-29	1.15551e-27	56.0597
NADSYN1	0.834842	6.8539	11.9468	1.95016e-29	1.19396e-27	56.0236
FLNA	-1.14269	8.14164	-11.9307	2.27505e-29	1.38488e-27	55.8713
TAP2	-0.986784	5.44086	-11.9305	2.27888e-29	1.38488e-27	55.8696
CHADL	0.687355	3.35166	11.9278	2.33878e-29	1.41604e-27	55.844
PKMYT1	-0.858934	4.24997	-11.9013	3.01217e-29	1.81365e-27	55.5938
PRC1	-0.982185	5.89447	-11.9011	3.01759e-29	1.81365e-27	55.5921
TNNC1	1.78022	4.70748	11.898	3.10759e-29	1.86093e-27	55.563
TXN	-0.753091	9.90038	-11.8903	3.34598e-29	1.99639e-27	55.49
CDA	-1.49084	4.26791	-11.8883	3.41183e-29	2.02831e-27	55.4707
ZNF493	0.657029	3.4634	11.8853	3.50962e-29	2.07891e-27	55.4428
KRT5	-3.42509	8.06402	-11.8826	3.60189e-29	2.12589e-27	55.4171
CD44	-1.48215	7.54118	-11.8773	3.78925e-29	2.22846e-27	55.367
ECHDC2	0.729261	6.06016	11.8719	3.98766e-29	2.33677e-27	55.3165
PTPN12	-0.744565	6.68632	-11.863	4.34264e-29	2.53573e-27	55.2322
CCDC71L	-0.791516	3.82656	-11.8582	4.54333e-29	2.64351e-27	55.1876
KNSTRN	-0.685817	4.90765	-11.8564	4.62237e-29	2.67999e-27	55.1705
KATNAL1	-0.785896	2.98958	-11.8525	4.79797e-29	2.7636e-27	55.1337
PRR11	-0.91686	5.14653	-11.8524	4.80025e-29	2.7636e-27	55.1332
TMEM184A	1.17804	5.38407	11.847	5.05594e-29	2.90063e-27	55.0819
PSMD1	-0.55361	7.01057	-11.8299	5.95036e-29	3.40186e-27	54.9209
SLC44A3	1.18141	6.2374	11.8142	6.90604e-29	3.93453e-27	54.7737
ACTB	-0.562045	13.0262	-11.8081	7.32194e-29	4.15704e-27	54.7159
GPD1L	1.13185	6.42935	11.8018	7.77378e-29	4.39835e-27	54.6567
SERPINB7	-1.32862	2.42518	-11.8014	7.80125e-29	4.39872e-27	54.6532
LRRC8A	-0.844666	6.26159	-11.7997	7.9267e-29	4.45416e-27	54.6374
SIGLEC15	1.13712	3.07032	11.7989	7.98994e-29	4.4649e-27	54.6296
UCP2	1.2728	7.64148	11.7987	8.00025e-29	4.4649e-27	54.6283
TESC	2.01581	5.29606	11.7978	8.07496e-29	4.49132e-27	54.6191
SLC30A2	1.9477	3.97642	11.7954	8.25997e-29	4.5787e-27	54.5967
TNFAIP6	-1.23829	3.74609	-11.7947	8.3116e-29	4.59181e-27	54.5905
ZBED2	-1.31286	2.70297	-11.783	9.2939e-29	5.11726e-27	54.4801
KIF20A	-0.975295	5.84539	-11.7774	9.79503e-29	5.37515e-27	54.4282
G3BP1	-0.53719	7.35966	-11.7691	1.05962e-28	5.7954e-27	54.3505
SULF2	-1.6245	5.21465	-11.7671	1.08028e-28	5.88876e-27	54.3314
PUS7	-0.627257	5.40688	-11.7562	1.19807e-28	6.50926e-27	54.2291
MKRN2OS	0.981199	3.83912	11.7298	1.5384e-28	8.3307e-27	53.982
KRT16	-2.83007	6.82666	-11.7244	1.61911e-28	8.72714e-27	53.9315
TMEM178A	0.951716	2.86969	11.7242	1.62224e-28	8.72714e-27	53.9296
SGK1	-1.23789	5.69416	-11.7204	1.68173e-28	9.01757e-27	53.894
EIF3B	-0.499925	7.80415	-11.7188	1.7076e-28	9.12648e-27	53.8789
GAL	-1.56986	2.81339	-11.7174	1.72931e-28	9.21251e-27	53.8664
KIF4A	-0.928685	5.66693	-11.7162	1.75002e-28	9.29264e-27	53.8546
KLF10	-0.814626	5.45784	-11.7104	1.8484e-28	9.78339e-27	53.8006
WDR43	-0.508438	6.48513	-11.7089	1.8742e-28	9.88807e-27	53.7869
INHBA	-1.31772	4.1498	-11.7066	1.91567e-28	1.00745e-26	53.7652
DENND2D	0.930298	6.39623	11.7037	1.9693e-28	1.03234e-26	53.7379
TGFBI	-1.61131	7.26503	-11.6996	2.04662e-28	1.06946e-26	53.6999
PRMT5	-0.690436	6.50956	-11.6908	2.2246e-28	1.15618e-26	53.6175
AREG	-1.72779	5.4775	-11.6907	2.22668e-28	1.15618e-26	53.6165
GLIPR1	-0.92757	4.1141	-11.6856	2.33537e-28	1.2088e-26	53.5694
CXCL8	-1.94876	5.39088	-11.6776	2.51965e-28	1.30007e-26	53.4944
ILDR1	0.949089	4.86209	11.6752	2.57828e-28	1.32616e-26	53.4716
ZFHX3	0.795661	5.56197	11.6714	2.67053e-28	1.36795e-26	53.4369
RIOK1	-0.581904	5.87224	-11.6712	2.67621e-28	1.36795e-26	53.4348
S100A8	-2.92178	7.85915	-11.6661	2.80897e-28	1.43135e-26	53.3869
PLIN3	-0.660702	6.89863	-11.6652	2.83325e-28	1.43926e-26	53.3784
DSP	-1.539	7.73257	-11.6589	3.00535e-28	1.52197e-26	53.3202
STRAP	-0.644347	8.15194	-11.6526	3.18985e-28	1.61043e-26	53.2613
ADORA2B	-1.15784	4.55336	-11.641	3.55784e-28	1.79071e-26	53.1534
ST3GAL5	1.42012	5.45166	11.6396	3.60433e-28	1.80856e-26	53.1405
PAQR8	1.20824	4.51822	11.6362	3.7225e-28	1.86216e-26	53.1087
SPRR2A	-2.29112	3.36206	-11.6202	4.32984e-28	2.15939e-26	52.9593
DTL	-0.884217	5.04325	-11.6183	4.40757e-28	2.1915e-26	52.9417
CAB39L	1.21737	5.28492	11.6177	4.43357e-28	2.19777e-26	52.9359
CDCA2	-0.820287	4.27993	-11.6089	4.81653e-28	2.38041e-26	52.854
TENM2	-1.36852	2.39559	-11.5979	5.33882e-28	2.63061e-26	52.7523
TMEM45B	1.6014	5.82162	11.5972	5.37661e-28	2.6413e-26	52.7453
OCEL1	0.628804	5.5747	11.5912	5.68542e-28	2.78467e-26	52.6901
SERPINB9	-1.07948	4.08532	-11.5845	6.0553e-28	2.957e-26	52.6278
ERBB3	1.10201	7.49545	11.5701	6.93543e-28	3.37675e-26	52.4937
PLA2G2F	2.09967	5.12741	11.5678	7.0852e-28	3.43947e-26	52.4726
FAM221A	0.752815	3.39857	11.5558	7.93008e-28	3.83825e-26	52.3613
MYLIP	1.0183	6.49017	11.544	8.85639e-28	4.27399e-26	52.2521
CENPA	-0.95411	4.51446	-11.5433	8.91917e-28	4.29167e-26	52.2451
SPRR1B	-2.73476	5.33663	-11.5429	8.95283e-28	4.29526e-26	52.2414
SLC9B2	-0.567683	2.71806	-11.5384	9.33368e-28	4.46493e-26	52.2002
PTPRM	1.12432	6.01496	11.5343	9.7034e-28	4.6283e-26	52.1619
CTSH	1.22358	8.25924	11.5283	1.02607e-27	4.87995e-26	52.1067
CASQ1	1.73531	4.1488	11.5259	1.04915e-27	4.9753e-26	52.0847
ZNF682	0.82584	3.70666	11.5241	1.06739e-27	5.04717e-26	52.0677
GART	-0.558169	6.51602	-11.506	1.26406e-27	5.95999e-26	51.9005
ME3	0.937937	4.73369	11.5	1.33733e-27	6.28739e-26	51.8449
CKS2	-0.903146	7.70707	-11.4936	1.42057e-27	6.65965e-26	51.7852
FOXM1	-1.01445	5.6489	-11.473	1.72199e-27	8.04969e-26	51.5951
EGFR	-1.21575	6.12203	-11.4618	1.91063e-27	8.90614e-26	51.4923
KLK10	-1.6289	2.83868	-11.46	1.94362e-27	9.03095e-26	51.4754
PPP1R18	-0.842903	5.83693	-11.4597	1.94841e-27	9.03095e-26	51.473
MAD2L1	-0.904983	4.96696	-11.449	2.15462e-27	9.95859e-26	51.3736
PLAU	-1.39591	7.15637	-11.4422	2.29416e-27	1.05738e-25	51.3116
RUVBL1	-0.62609	6.07022	-11.4396	2.35134e-27	1.08069e-25	51.2873
PSMD2	-0.630126	8.3762	-11.4309	2.55078e-27	1.16907e-25	51.2068
DDN	-0.475666	2.03485	-11.4306	2.55788e-27	1.16907e-25	51.2041
SLC39A14	-0.864422	4.31576	-11.4282	2.61547e-27	1.19207e-25	51.1821
PGK1	-0.861169	9.21556	-11.4191	2.84525e-27	1.29321e-25	51.0989
PRPF4	-0.563211	6.27945	-11.4155	2.9428e-27	1.33385e-25	51.0656
ZNF253	0.724409	4.86593	11.407	3.18462e-27	1.43948e-25	50.9875
DCUN1D5	-0.706231	5.94941	-11.4062	3.21037e-27	1.44714e-25	50.9796
CXCL1	-1.89288	5.05526	-11.3973	3.48748e-27	1.56774e-25	50.8978
KIF20B	-0.740466	4.91628	-11.3965	3.51377e-27	1.57525e-25	50.8904
YWHAG	-0.659206	7.52341	-11.3942	3.58777e-27	1.60404e-25	50.8698
LOX	-1.18833	3.91042	-11.3896	3.74539e-27	1.66996e-25	50.8273
ZNF846	0.658505	3.97272	11.3873	3.82797e-27	1.70215e-25	50.8057
DKC1	-0.553718	7.24464	-11.3812	4.05234e-27	1.79705e-25	50.7495
ELF3	1.30359	8.1233	11.3793	4.12419e-27	1.82398e-25	50.7321
NR2F6	0.634451	7.29009	11.377	4.21113e-27	1.85743e-25	50.7115
IDUA	0.894253	5.17057	11.3766	4.22639e-27	1.85916e-25	50.7079
NIP7	-0.563663	6.12124	-11.3759	4.25455e-27	1.86654e-25	50.7014
ACAA1	0.669935	6.41249	11.3688	4.54644e-27	1.98928e-25	50.6358
CROT	1.07868	6.6905	11.3642	4.74262e-27	2.0696e-25	50.5941
SRCIN1	0.801749	2.93824	11.3608	4.8973e-27	2.13143e-25	50.5623
ANXA9	1.47393	5.32968	11.36	4.93318e-27	2.14136e-25	50.5551
SPC25	-0.802462	4.51357	-11.3442	5.71106e-27	2.47248e-25	50.4105
PGLYRP3	-1.3568	2.81492	-11.3345	6.24692e-27	2.69735e-25	50.3219
POLD2	-0.590226	7.57359	-11.3315	6.42376e-27	2.76643e-25	50.2943
ASIC1	-0.711585	2.49573	-11.3272	6.68626e-27	2.86705e-25	50.2547
SACS	-0.748265	3.2463	-11.3271	6.69236e-27	2.86705e-25	50.2538
KIF2C	-0.928387	5.67819	-11.3248	6.83624e-27	2.92107e-25	50.2328
BAG3	-0.686378	7.2591	-11.324	6.88884e-27	2.9359e-25	50.2252
NPM1	-0.669388	8.90565	-11.3224	6.98865e-27	2.97072e-25	50.211
SEMA5A	1.55411	5.28935	11.3196	7.17276e-27	3.0411e-25	50.1853
POF1B	1.48043	5.27541	11.3194	7.19143e-27	3.04116e-25	50.1828
LRRC42	-0.677389	6.41753	-11.3135	7.59509e-27	3.20361e-25	50.1288
CACFD1	0.66422	5.0076	11.3124	7.67286e-27	3.22811e-25	50.1187
MFAP3L	0.933461	3.31546	11.3042	8.27325e-27	3.46927e-25	50.0443
MAMLD1	-0.612015	2.5098	-11.304	8.28836e-27	3.46927e-25	50.0425
MKI67	-0.886305	6.23508	-11.3003	8.58299e-27	3.58345e-25	50.008
DSE	-0.996403	4.31696	-11.2991	8.67385e-27	3.6122e-25	49.9976
EIF2S1	-0.567086	6.43693	-11.2959	8.93595e-27	3.71193e-25	49.9682
HSPD1	-0.619675	8.76753	-11.2954	8.97648e-27	3.71935e-25	49.9637
P4HA2	-0.793906	5.55452	-11.2928	9.19666e-27	3.80098e-25	49.9398
RHCG	-1.97321	3.91658	-11.2836	1.00134e-26	4.12816e-25	49.8557
PBK	-0.929653	4.87049	-11.2825	1.01121e-26	4.1584e-25	49.846
SGTB	-0.570875	3.00336	-11.2703	1.13206e-26	4.64371e-25	49.7345
SERPINE1	-1.51165	7.35824	-11.2662	1.17584e-26	4.81127e-25	49.697
CXCL2	-1.20308	3.19176	-11.2655	1.18328e-26	4.82966e-25	49.6908
UTP14A	-0.475902	6.00345	-11.2648	1.19143e-26	4.84559e-25	49.684
RNF128	1.72666	6.52508	11.2646	1.19309e-26	4.84559e-25	49.6826
DAPK1	1.2206	6.10354	11.2631	1.21031e-26	4.90339e-25	49.6685
ATP1A4	1.18021	2.89699	11.2498	1.36798e-26	5.52851e-25	49.5475
DEGS1	-1.05632	6.43355	-11.2425	1.46325e-26	5.89903e-25	49.481
ARSJ	-0.811395	2.42281	-11.2377	1.52959e-26	6.15134e-25	49.4372
SRC	0.78442	7.02491	11.2348	1.57211e-26	6.30688e-25	49.4101
SH3RF2	-1.07642	3.29915	-11.233	1.59741e-26	6.39274e-25	49.3943
CDCA5	-0.997273	5.42221	-11.2322	1.61002e-26	6.42755e-25	49.3866
RAB31	-1.07583	6.31298	-11.2202	1.79776e-26	7.15961e-25	49.2776
SIRPA	-1.14895	5.28586	-11.2164	1.86181e-26	7.39674e-25	49.243
EHD2	-1.01283	6.18629	-11.2159	1.87069e-26	7.41409e-25	49.2383
ZNF83	0.780465	6.22448	11.1985	2.1963e-26	8.68357e-25	49.0798
RHPN1	1.13352	5.01234	11.1951	2.26583e-26	8.93697e-25	49.049
PLXNB1	0.779035	6.78304	11.1899	2.37568e-26	9.34777e-25	49.0023
EXO1	-0.819083	4.71946	-11.1861	2.46187e-26	9.66374e-25	48.9671
PLEKHG6	1.08809	5.51951	11.1843	2.50286e-26	9.80116e-25	48.9507
SH3BGRL2	0.984288	5.21083	11.1778	2.65739e-26	1.03815e-24	48.8916
CCL4	-1.15951	4.27483	-11.1773	2.66821e-26	1.0399e-24	48.8876
RND3	-0.95337	6.17773	-11.1702	2.84747e-26	1.10714e-24	48.8233
FREM1	0.804213	2.54051	11.1662	2.95627e-26	1.14673e-24	48.7863
TMEM63A	0.742961	5.88521	11.1636	3.02773e-26	1.17167e-24	48.7627
CYP4F8	2.14515	4.02226	11.1621	3.07008e-26	1.18527e-24	48.749
KIF18A	-0.698474	4.1326	-11.1618	3.07826e-26	1.18563e-24	48.7463
DEPDC1	-0.87324	4.14608	-11.1594	3.1464e-26	1.20904e-24	48.7247
NDRG2	1.24127	6.10038	11.1579	3.18988e-26	1.22289e-24	48.7112
ZFP14	0.584077	3.6553	11.153	3.33797e-26	1.27667e-24	48.6663
CLIC4	-1.03531	6.02034	-11.1455	3.57425e-26	1.36387e-24	48.5988
SIDT1	1.01323	3.68257	11.1231	4.38884e-26	1.67081e-24	48.396
PCP2	0.834361	2.87274	11.121	4.47299e-26	1.69891e-24	48.3772
NOLC1	-0.554517	6.90914	-11.105	5.18085e-26	1.96322e-24	48.2321
YWHAH	-0.641944	8.42105	-11.1023	5.3093e-26	2.00726e-24	48.2079
SEC14L2	-0.921246	3.7394	-11.0997	5.43846e-26	2.05136e-24	48.1842
TRAPPC6A	0.797725	6.33715	11.0984	5.5061e-26	2.07211e-24	48.172
AGTRAP	-0.667038	5.95237	-11.0976	5.54334e-26	2.08135e-24	48.1653
CDK1	-0.87	6.05054	-11.0968	5.58336e-26	2.09159e-24	48.1582
ARNTL2	-0.938637	4.65059	-11.0927	5.80035e-26	2.16793e-24	48.1206
SPATA6	0.632106	3.28283	11.0918	5.84741e-26	2.18055e-24	48.1126
SOCS3	-0.958444	5.7293	-11.0796	6.53667e-26	2.43206e-24	48.0025
ACOT9	-0.755719	5.29447	-11.0767	6.71604e-26	2.49314e-24	47.9758
RRM2	-0.946728	6.10277	-11.0574	8.00935e-26	2.96653e-24	47.8019
NAALADL2	0.897636	3.54003	11.0509	8.49445e-26	3.13912e-24	47.7438
RBPMS	0.800981	5.08296	11.0486	8.67739e-26	3.19952e-24	47.7227
NEK8	0.610773	4.61426	11.0466	8.83846e-26	3.2516e-24	47.7046
PDCD1LG2	-0.978482	2.83549	-11.0443	9.02266e-26	3.31194e-24	47.6842
GPRIN1	-0.911574	3.48601	-11.0402	9.36889e-26	3.43136e-24	47.647
ERCC6L	-0.776075	3.93128	-11.0399	9.39172e-26	3.43206e-24	47.6446
SLC35G2	-0.847703	3.19067	-11.0363	9.71196e-26	3.5412e-24	47.6115
DGAT2	1.17857	5.32803	11.0328	1.00238e-25	3.64106e-24	47.5803
SLC25A42	0.519516	3.54454	11.0327	1.00302e-25	3.64106e-24	47.5796
IL1R2	-1.06178	3.18946	-11.024	1.08588e-25	3.93314e-24	47.5012
BCL2A1	-1.15537	3.82604	-11.0228	1.0977e-25	3.96719e-24	47.4906
ATF7IP2	1.05267	4.92183	11.0171	1.15627e-25	4.16969e-24	47.4392
IDO1	-1.76718	4.14402	-11.0153	1.17574e-25	4.23061e-24	47.4227
CCT6A	-0.538549	8.29328	-11.0083	1.25364e-25	4.50105e-24	47.3594
CD274	-1.0766	3.1348	-11.0067	1.27141e-25	4.55488e-24	47.3455
PLS3	-0.894204	7.20642	-10.9999	1.3524e-25	4.83447e-24	47.2845
ABL2	-0.486462	3.77718	-10.9826	1.58285e-25	5.64594e-24	47.1291
ANP32B	-0.636288	9.56241	-10.9792	1.63307e-25	5.81247e-24	47.0982
HMGA1	-0.734867	8.11617	-10.977	1.66546e-25	5.91491e-24	47.0788
NAA20	-0.474445	7.75788	-10.9747	1.70174e-25	6.0307e-24	47.0576
PIGZ	0.959983	4.30258	10.9699	1.77768e-25	6.28626e-24	47.0145
PLA2G6	0.639055	4.09061	10.9634	1.88547e-25	6.65307e-24	46.9563
KRTAP5-9	1.22719	3.23485	10.9608	1.92965e-25	6.79435e-24	46.9334
TGM1	-1.51037	3.83688	-10.9485	2.15815e-25	7.58263e-24	46.8229
CYP3A5	1.65893	4.74198	10.9453	2.22227e-25	7.78873e-24	46.794
RAB17	0.811672	3.57485	10.9451	2.2263e-25	7.78873e-24	46.7922
C2orf15	0.790454	3.8875	10.9405	2.32106e-25	8.10297e-24	46.7511
S100A7	-3.10262	5.32233	-10.9392	2.34803e-25	8.1797e-24	46.7397
RABEPK	-0.464273	5.84498	-10.9389	2.3543e-25	8.18417e-24	46.737
AK4	-1.10456	3.55341	-10.9373	2.39045e-25	8.2923e-24	46.722
FTSJ1	-0.479869	5.83637	-10.9367	2.40152e-25	8.31312e-24	46.7174
DEPDC1B	-0.764742	4.22168	-10.9362	2.41445e-25	8.34026e-24	46.7121
ARHGAP11A	-0.687179	4.26111	-10.9316	2.51638e-25	8.67412e-24	46.6713
IL12RB2	-0.94811	2.51246	-10.9309	2.53162e-25	8.70834e-24	46.6653
SRMS	0.875522	3.125	10.9292	2.57283e-25	8.82856e-24	46.6494
HPRT1	-0.664632	7.20315	-10.929	2.57733e-25	8.82856e-24	46.6476
WDHD1	-0.667888	4.41197	-10.9233	2.71395e-25	9.27718e-24	46.5966
IL36G	-1.30632	2.48516	-10.9122	3.00106e-25	1.02373e-23	46.4973
MMEL1	0.73847	2.76738	10.9118	3.01231e-25	1.02544e-23	46.4936
KCNQ1	1.059	4.70429	10.909	3.08863e-25	1.04924e-23	46.4689
VDAC2	-0.540743	6.90364	-10.9028	3.26569e-25	1.1071e-23	46.4139
GSDMB	0.981325	6.01372	10.8964	3.46059e-25	1.17075e-23	46.3567
ECE2	-0.592929	3.9488	-10.8954	3.49257e-25	1.17914e-23	46.3476
MAP7D3	-0.713926	3.3276	-10.8823	3.9327e-25	1.325e-23	46.2304
SOX7	-1.09749	3.27931	-10.8821	3.94075e-25	1.325e-23	46.2284
MCM10	-0.873113	4.55514	-10.8805	3.99587e-25	1.34078e-23	46.2146
TCOF1	-0.421084	4.9167	-10.8686	4.45239e-25	1.49091e-23	46.1078
CYP2J2	1.37038	5.83409	10.86	4.80966e-25	1.60727e-23	46.0316
ACSM3	1.09169	3.59596	10.8531	5.11846e-25	1.70698e-23	45.9702
OGFRL1	-0.85272	3.65405	-10.8349	6.03489e-25	2.00604e-23	45.8075
XPO5	-0.517632	6.22914	-10.8348	6.03965e-25	2.00604e-23	45.8068
TRPT1	0.492695	5.74878	10.8294	6.33875e-25	2.10114e-23	45.759
BIRC5	-0.799577	5.27382	-10.8262	6.52358e-25	2.15804e-23	45.7307
PAQR7	0.904326	6.299	10.8248	6.60999e-25	2.18223e-23	45.7177
PPA1	-0.61247	7.98561	-10.8228	6.73103e-25	2.21773e-23	45.6997
PMEPA1	-1.2669	4.98608	-10.8221	6.77045e-25	2.22624e-23	45.694
SGK2	1.40386	3.43538	10.8084	7.66069e-25	2.51393e-23	45.572
CCNB2	-0.946915	6.4561	-10.8052	7.88735e-25	2.58315e-23	45.5432
NEK6	-0.93599	4.5483	-10.8031	8.03162e-25	2.62515e-23	45.5253
KLK6	-1.79127	2.85611	-10.796	8.56369e-25	2.79177e-23	45.462
RELT	-0.518889	3.41344	-10.7959	8.57539e-25	2.79177e-23	45.4606
ABHD12	0.702697	7.96873	10.7918	8.89856e-25	2.89124e-23	45.4241
CREB5	-0.558294	2.37984	-10.7858	9.38607e-25	3.04361e-23	45.3715
CMYA5	1.07931	4.33113	10.783	9.63047e-25	3.1167e-23	45.3461
RAP1GAP	1.12319	4.93854	10.7792	9.95851e-25	3.21652e-23	45.313
TNFAIP2	1.24486	8.52616	10.7775	1.01114e-24	3.25947e-23	45.298
TTK	-0.877577	5.39507	-10.7738	1.04556e-24	3.36382e-23	45.2649
PRDM1	-0.854713	4.42646	-10.7719	1.06404e-24	3.41658e-23	45.2476
EREG	-1.37922	2.80641	-10.7678	1.10377e-24	3.53724e-23	45.2114
PLCE1	0.977038	4.41806	10.7646	1.13605e-24	3.6336e-23	45.183
EIF5A	-0.509277	8.83618	-10.7597	1.18711e-24	3.7895e-23	45.1396
GPATCH4	-0.554847	5.52193	-10.7559	1.22797e-24	3.91234e-23	45.1061
SLC9A4	1.34791	3.08192	10.7509	1.28474e-24	4.08526e-23	45.0615
CCDC174	0.474074	5.77412	10.7484	1.31393e-24	4.17002e-23	45.0393
OSM	-0.784295	2.66741	-10.7471	1.32934e-24	4.21077e-23	45.0278
DUSP14	-0.658988	4.81965	-10.746	1.34273e-24	4.24498e-23	45.0179
KLK7	-1.47824	2.46978	-10.7455	1.34844e-24	4.25484e-23	45.0138
BUB1B	-0.835382	5.77216	-10.7449	1.35577e-24	4.26977e-23	45.0084
CTSC	-1.0346	6.5029	-10.7401	1.41451e-24	4.43876e-23	44.9665
FAM219B	0.574046	4.3991	10.7401	1.41484e-24	4.43876e-23	44.9663
CXCL10	-2.0152	5.81191	-10.7316	1.52725e-24	4.78228e-23	44.8908
COPS3	-0.562834	6.85688	-10.725	1.61977e-24	5.06231e-23	44.8328
PAICS	-0.630779	6.97904	-10.7244	1.62918e-24	5.08206e-23	44.827
PSMG1	-0.635286	6.24491	-10.7173	1.73588e-24	5.40463e-23	44.7644
NPTXR	1.24251	3.75373	10.7144	1.78208e-24	5.53796e-23	44.7385
GFPT2	-1.27679	3.39924	-10.7068	1.90715e-24	5.9154e-23	44.6715
AVEN	-0.551578	5.43511	-10.701	2.0078e-24	6.21586e-23	44.6207
ETF1	-0.543787	6.33597	-10.6899	2.21779e-24	6.85301e-23	44.5226
MND1	-0.692527	4.08476	-10.6893	2.23083e-24	6.88033e-23	44.5168
CDC42EP1	-0.880485	5.67317	-10.6888	2.24037e-24	6.89682e-23	44.5125
FAAH	0.909399	6.31187	10.6855	2.30643e-24	7.08688e-23	44.4839
ERP27	1.59914	5.49845	10.6837	2.34452e-24	7.19046e-23	44.4677
LRR1	-0.582984	4.47072	-10.6788	2.44917e-24	7.48558e-23	44.4246
JUN	-0.838342	6.77322	-10.6786	2.45421e-24	7.48558e-23	44.4226
SLC37A1	0.840107	5.3711	10.6786	2.45444e-24	7.48558e-23	44.4225
OSBPL6	-0.588058	2.11403	-10.676	2.51178e-24	7.64624e-23	44.3997
ANXA5	-0.961346	8.35639	-10.6757	2.51737e-24	7.64907e-23	44.3975
MTFR1L	0.440554	5.87128	10.675	2.53368e-24	7.68441e-23	44.3911
DNAJB5	-0.674364	3.34487	-10.6714	2.6167e-24	7.92156e-23	44.3593
ACTR3	-0.590303	7.098	-10.6706	2.63504e-24	7.96239e-23	44.3524
SPRR2E	-1.80276	2.71075	-10.6632	2.8156e-24	8.49234e-23	44.287
CDCA7	-1.00117	5.07601	-10.6582	2.94448e-24	8.86477e-23	44.2428
TMEM125	0.966388	4.33188	10.6477	3.23308e-24	9.71581e-23	44.1505
ATP1A1	-0.687758	8.92514	-10.6444	3.32845e-24	9.98412e-23	44.1218
FCGR2A	-1.16398	4.72381	-10.6368	3.56325e-24	1.06689e-22	44.0545
IFITM3	-1.19226	9.47045	-10.6346	3.63293e-24	1.08578e-22	44.0354
NUAK2	-0.884963	3.41143	-10.616	4.28708e-24	1.27895e-22	43.8719
AURKB	-0.890899	5.87918	-10.5986	5.00839e-24	1.49143e-22	43.7184
BLNK	0.913506	4.96824	10.5977	5.04594e-24	1.49989e-22	43.7111
SERBP1	-0.455001	7.33311	-10.5965	5.09913e-24	1.51296e-22	43.7007
MCFD2	-0.60945	5.97103	-10.5954	5.14986e-24	1.52525e-22	43.6909
AMT	0.87851	4.93543	10.5928	5.27112e-24	1.55835e-22	43.668
FN1	-1.5901	7.71711	-10.5912	5.34917e-24	1.57858e-22	43.6535
HAPLN3	-1.03361	3.95798	-10.5838	5.71234e-24	1.68273e-22	43.5886
PITX1	-1.18367	5.52244	-10.5708	6.41062e-24	1.88252e-22	43.4748
GJB2	-1.87645	7.53122	-10.5707	6.41351e-24	1.88252e-22	43.4744
CSE1L	-0.554503	7.95185	-10.5618	6.94294e-24	2.03428e-22	43.3961
LAMA3	-1.60262	5.02209	-10.5576	7.20726e-24	2.10796e-22	43.3592
EVA1A	-1.04931	2.79608	-10.5537	7.4583e-24	2.17751e-22	43.3254
ALDH4A1	0.886709	5.84266	10.5518	7.58692e-24	2.21112e-22	43.3085
RRM1	-0.696858	7.53323	-10.5493	7.75578e-24	2.25633e-22	43.2868
CBX7	0.554798	4.00687	10.5483	7.82359e-24	2.27203e-22	43.2782
TBC1D9	0.822719	6.05108	10.5431	8.19695e-24	2.37625e-22	43.2322
GMPS	-0.582138	6.91828	-10.5406	8.37768e-24	2.42435e-22	43.2107
GPR68	-1.02583	3.44011	-10.5378	8.58875e-24	2.48106e-22	43.1861
RAB11FIP4	0.850167	4.655	10.5297	9.22354e-24	2.65975e-22	43.1157
B4GALNT1	-0.801775	2.42577	-10.5276	9.39632e-24	2.70482e-22	43.0974
CEBPB	-0.838001	7.47815	-10.5261	9.52696e-24	2.73762e-22	43.0838
SRGN	-1.24452	6.88946	-10.5242	9.6839e-24	2.77786e-22	43.0677
BARX2	-1.42745	3.45107	-10.5217	9.89954e-24	2.83476e-22	43.0459
SLAMF9	-0.673303	2.19563	-10.5185	1.01871e-23	2.91202e-22	43.0177
PSMB7	-0.523109	8.58074	-10.518	1.02353e-23	2.9207e-22	43.013
LRRC8C	-0.636891	3.48973	-10.5122	1.07705e-23	3.0681e-22	42.9627
RBM6	0.593941	7.01922	10.4986	1.21461e-23	3.45395e-22	42.8441
FAM83A	-1.79627	4.98615	-10.4978	1.22312e-23	3.47215e-22	42.8372
ECM1	-1.02857	5.46357	-10.4975	1.22615e-23	3.47471e-22	42.8347
SMC2	-0.729671	4.88042	-10.4962	1.24125e-23	3.51145e-22	42.8227
NDUFAF2	-0.516186	6.4688	-10.4948	1.25679e-23	3.54931e-22	42.8104
BUB1	-0.788646	5.65055	-10.4909	1.29985e-23	3.65843e-22	42.7771
SPTSSB	1.79722	5.32987	10.4909	1.29989e-23	3.65843e-22	42.7771
LLGL2	0.800959	5.58783	10.4902	1.30881e-23	3.67721e-22	42.7704
SFN	-1.20627	9.58134	-10.4898	1.31334e-23	3.68364e-22	42.7669
BTG2	1.04818	7.15889	10.4825	1.40103e-23	3.92288e-22	42.7032
GBP5	-1.45779	3.81618	-10.4809	1.42054e-23	3.97072e-22	42.6895
PRPS1	-0.716594	6.61422	-10.4758	1.48628e-23	4.14743e-22	42.6449
PSMB5	-0.507819	8.01447	-10.4748	1.49902e-23	4.17588e-22	42.6364
CCSER1	0.834664	3.50684	10.4744	1.50354e-23	4.18138e-22	42.6335
FN3K	0.640883	5.12124	10.4677	1.59631e-23	4.43185e-22	42.5744
ZNF233	0.49191	2.6046	10.4595	1.71612e-23	4.75644e-22	42.503
MSX2	1.31661	5.42961	10.455	1.78535e-23	4.93997e-22	42.4639
PPAT	-0.604634	4.86409	-10.4539	1.80236e-23	4.97865e-22	42.4546
CEACAM19	-0.665885	2.66682	-10.4413	2.01323e-23	5.55178e-22	42.3454
PDLIM7	-0.76902	5.35496	-10.4391	2.05235e-23	5.65015e-22	42.3264
G0S2	-1.22523	4.41777	-10.4293	2.23884e-23	6.15326e-22	42.2406
CDCA8	-0.861689	6.04644	-10.4289	2.24653e-23	6.16406e-22	42.2372
TMCO4	0.605832	5.44726	10.4282	2.25955e-23	6.18943e-22	42.2315
KRTAP5-10	0.829336	2.41538	10.4228	2.36898e-23	6.47836e-22	42.1848
SH3GL3	-0.622664	1.91699	-10.4226	2.37476e-23	6.48336e-22	42.1824
EPB41L1	0.921044	6.42404	10.4142	2.55557e-23	6.96542e-22	42.11
RERE	0.570607	6.73464	10.4126	2.59313e-23	7.05607e-22	42.0956
PCYT2	0.629086	5.59101	10.4122	2.60245e-23	7.06969e-22	42.0921
NUP188	-0.577037	6.22497	-10.4103	2.6448e-23	7.17288e-22	42.0761
FPR2	-0.667186	2.40127	-10.4056	2.75676e-23	7.46418e-22	42.0352
GFOD1	-0.778271	3.60057	-10.4036	2.80492e-23	7.58206e-22	42.0181
PYROXD2	0.894923	4.10967	10.4031	2.81762e-23	7.60388e-22	42.0137
PLCD1	1.00349	5.86584	10.3952	3.02117e-23	8.13979e-22	41.9448
LYPD6B	1.13254	5.74033	10.3941	3.05028e-23	8.20475e-22	41.9354
PANX1	-0.659702	4.8949	-10.3928	3.08527e-23	8.28529e-22	41.9241
CLEC5A	-0.644336	2.44485	-10.39	3.16038e-23	8.47312e-22	41.9004
REPIN1	0.598295	5.67054	10.3772	3.53637e-23	9.46571e-22	41.7895
POP1	-0.527331	4.66904	-10.3763	3.56379e-23	9.51499e-22	41.7819
IRAK1	-0.659999	7.65001	-10.3763	3.56638e-23	9.51499e-22	41.7811
ACOT7	-0.748955	5.90497	-10.3694	3.78741e-23	1.00883e-21	41.7218
PRR15L	1.32389	4.37896	10.3672	3.86267e-23	1.02721e-21	41.7024
GBP1	-1.22671	6.26312	-10.3655	3.92043e-23	1.04088e-21	41.6877
TAF4B	-0.723731	3.34164	-10.3634	3.9904e-23	1.05774e-21	41.6703
RRAS2	-0.804128	5.04472	-10.361	4.07705e-23	1.07897e-21	41.6491
PPM1J	-0.617469	2.82063	-10.3565	4.2403e-23	1.12037e-21	41.6104
KLK8	-1.29651	2.42719	-10.3252	5.57848e-23	1.47157e-21	41.3397
MEFV	-0.592811	2.30082	-10.3245	5.6098e-23	1.47746e-21	41.3342
NDC80	-0.892276	5.62951	-10.3225	5.70761e-23	1.50081e-21	41.3171
NOC3L	-0.443082	5.17335	-10.315	6.0977e-23	1.60082e-21	41.2519
ATOH8	1.14155	3.15812	10.3141	6.14322e-23	1.61019e-21	41.2446
NUP205	-0.52143	6.71642	-10.3119	6.26608e-23	1.63978e-21	41.225
ZC3H12B	0.497068	2.2911	10.31	6.369e-23	1.66405e-21	41.209
TK1	-0.840538	6.6448	-10.3071	6.53236e-23	1.70402e-21	41.184
NBPF11	0.610032	3.75959	10.3062	6.58289e-23	1.71448e-21	41.1764
KCTD9	-0.596209	4.72071	-10.3056	6.61586e-23	1.72033e-21	41.1714
DERA	-0.601041	6.11527	-10.3036	6.73231e-23	1.74784e-21	41.1542
TSPAN6	0.839597	6.60208	10.2978	7.08514e-23	1.83654e-21	41.1038
ABCF2	-0.454298	6.18037	-10.2918	7.46771e-23	1.93265e-21	41.0519
ADM	-1.0781	6.6304	-10.2897	7.60099e-23	1.96405e-21	41.0345
TLR6	-0.592969	2.62849	-10.2895	7.61623e-23	1.96489e-21	41.0325
CD86	-0.874809	3.68364	-10.2889	7.65633e-23	1.97214e-21	41.0273
EVX1	1.00943	2.73875	10.2885	7.68039e-23	1.97523e-21	41.0242
CDH3	-1.54326	6.76807	-10.2829	8.06917e-23	2.07197e-21	40.9755
PTGFRN	-0.783018	6.18933	-10.2621	9.66993e-23	2.47913e-21	40.797
VSIG10	0.734799	4.74505	10.2599	9.85406e-23	2.52239e-21	40.7784
PCSK9	-0.986359	2.52055	-10.2557	1.02277e-22	2.61397e-21	40.7417
NPRL2	0.486314	6.03415	10.2548	1.03073e-22	2.6302e-21	40.734
NCK1	-0.645811	5.02324	-10.2533	1.04395e-22	2.65979e-21	40.7214
CXCL11	-1.64594	3.86294	-10.2529	1.04755e-22	2.66484e-21	40.718
LAP3	-0.791887	7.01064	-10.2494	1.08025e-22	2.74377e-21	40.6877
NCAPD2	-0.685799	7.2267	-10.2418	1.15347e-22	2.92522e-21	40.623
IKBIP	-0.56927	4.52084	-10.24	1.17228e-22	2.96834e-21	40.6071
EBNA1BP2	-0.522015	7.55196	-10.2341	1.23312e-22	3.11758e-21	40.5571
CCT5	-0.634267	8.06087	-10.2289	1.29111e-22	3.25915e-21	40.5118
PATZ1	0.648373	4.9799	10.2245	1.34116e-22	3.3803e-21	40.4743
SLC3A2	-0.593367	7.35077	-10.2213	1.37926e-22	3.47098e-21	40.4467
HK3	-0.92976	3.13797	-10.2126	1.48749e-22	3.73763e-21	40.3721
CDC45	-0.794333	5.33072	-10.2123	1.49016e-22	3.73861e-21	40.3704
SOX9	-1.4819	5.10545	-10.2075	1.55354e-22	3.89168e-21	40.3293
TSPAN12	1.17018	5.09497	10.2062	1.57178e-22	3.93136e-21	40.3178
SOD2	-0.913273	6.36536	-10.2045	1.59521e-22	3.98389e-21	40.3032
SLCO1B3	-1.13171	2.26362	-10.1929	1.76462e-22	4.40029e-21	40.2036
BYSL	-0.500891	6.22882	-10.1918	1.78111e-22	4.43466e-21	40.1944
ZNF222	0.6143	4.43709	10.1857	1.87674e-22	4.6657e-21	40.1428
MMRN2	1.09711	5.10088	10.1839	1.90628e-22	4.73196e-21	40.1274
DYRK1B	0.628025	5.13487	10.1818	1.94239e-22	4.8143e-21	40.1089
HOXB5	1.23349	4.79839	10.1761	2.04045e-22	5.04973e-21	40.0603
CACNB3	0.575953	4.99859	10.1758	2.04563e-22	5.05492e-21	40.0578
CALU	-0.73787	7.12011	-10.167	2.20721e-22	5.44193e-21	39.9828
CENPF	-0.891559	5.86775	-10.1669	2.20888e-22	5.44193e-21	39.9821
TMCC3	-0.750253	3.18725	-10.1654	2.2385e-22	5.50664e-21	39.969
ECT2	-0.783652	5.13657	-10.1634	2.27778e-22	5.59489e-21	39.9518
IPO7	-0.563783	6.65318	-10.1616	2.31337e-22	5.67381e-21	39.9365
CHST11	-1.02239	4.31971	-10.1609	2.32765e-22	5.70032e-21	39.9304
HIF1A	-0.771514	7.26316	-10.1566	2.41459e-22	5.90441e-21	39.8943
KLK5	-1.67935	2.59332	-10.1542	2.46497e-22	6.01863e-21	39.8739
ZNF443	0.592445	3.9524	10.1536	2.47749e-22	6.04021e-21	39.8689
KSR2	0.618094	2.29707	10.1527	2.49805e-22	6.08132e-21	39.8607
LMF1	0.542027	3.64698	10.1517	2.51899e-22	6.1232e-21	39.8525
CAPN2	-0.841103	6.92293	-10.1475	2.61325e-22	6.34292e-21	39.8163
BRMS1L	-0.544032	4.26688	-10.1456	2.65671e-22	6.43888e-21	39.8
VMAC	0.441038	3.77785	10.1394	2.80133e-22	6.77937e-21	39.7477
PFKP	-0.786987	7.78396	-10.1357	2.89182e-22	6.98806e-21	39.7164
BMP3	1.4902	3.84613	10.1294	3.05512e-22	7.37183e-21	39.6622
NLN	-0.580148	4.14826	-10.1248	3.1775e-22	7.65587e-21	39.6234
B3GNT4	-0.517529	2.44914	-10.1238	3.20659e-22	7.71463e-21	39.6145
CKAP5	-0.56984	7.00428	-10.1225	3.24075e-22	7.78538e-21	39.604
GAPDH	-0.589992	11.7422	-10.1202	3.30795e-22	7.93521e-21	39.5838
CYP4F22	1.89332	5.36609	10.1135	3.50401e-22	8.39327e-21	39.527
NRAS	-0.579054	6.1848	-10.1127	3.52949e-22	8.44197e-21	39.5198
EPGN	-0.898363	2.29877	-10.1083	3.66564e-22	8.75486e-21	39.4825
MAP4K4	-0.707434	6.03867	-10.1031	3.83226e-22	9.13762e-21	39.4386
ATAD2	-0.781579	6.02227	-10.103	3.83704e-22	9.13762e-21	39.4374
SH3YL1	0.765921	5.89732	10.0998	3.9426e-22	9.37539e-21	39.4106
PPDPF	0.612498	9.29251	10.0951	4.10701e-22	9.75222e-21	39.3703
SRXN1	-0.676131	3.98834	-10.0946	4.12332e-22	9.77004e-21	39.3664
RRP12	-0.483287	5.6173	-10.0945	4.12643e-22	9.77004e-21	39.3657
ZNF540	0.497832	2.74882	10.0901	4.28747e-22	1.01367e-20	39.3279
ID2	0.989129	6.84085	10.0773	4.78378e-22	1.12938e-20	39.2199
TMEM97	1.25803	7.59463	10.0695	5.11605e-22	1.20609e-20	39.1537
LAMC2	-1.58807	6.47426	-10.0623	5.44341e-22	1.28143e-20	39.0925
FAM216A	-0.637231	3.59401	-10.0592	5.59128e-22	1.31416e-20	39.0661
CIRBP	0.565799	7.63235	10.059	5.59845e-22	1.31416e-20	39.0648
CAMSAP3	0.765053	5.4303	10.053	5.89644e-22	1.38213e-20	39.0137
ST3GAL4	1.08464	6.87545	10.0499	6.05443e-22	1.41713e-20	38.9876
SPIRE2	1.01357	4.60395	10.0482	6.14629e-22	1.43659e-20	38.9727
SETMAR	0.548195	5.19985	10.0475	6.18301e-22	1.44311e-20	38.9669
FAP	-1.17731	3.80171	-10.0392	6.63639e-22	1.54673e-20	38.8971
PACRG	0.689359	2.44035	10.0278	7.3189e-22	1.70338e-20	38.8005
HSD17B14	1.02304	4.947	10.0276	7.33395e-22	1.70447e-20	38.7985
C12orf54	-0.749266	2.25549	-10.0176	7.98999e-22	1.85187e-20	38.714
SCAMP5	0.910767	4.2036	10.0176	7.99075e-22	1.85187e-20	38.7139
NETO2	-0.997599	4.44412	-10.0152	8.15553e-22	1.88634e-20	38.6938
SAMD9	-1.07919	5.25479	-10.0151	8.16249e-22	1.88634e-20	38.693
MALL	-1.16602	3.8024	-10.0047	8.92283e-22	2.05915e-20	38.6051
PARD6A	0.734102	4.01033	10.003	9.0537e-22	2.08642e-20	38.5908
BHMT	2.10186	4.39822	9.99236	9.91456e-22	2.2816e-20	38.5012
SLC12A8	-0.816989	4.41678	-9.9921	9.93679e-22	2.28351e-20	38.499
DENND1A	-0.511242	4.31969	-9.98853	1.02444e-21	2.3509e-20	38.4689
IFITM1	-1.3676	7.8235	-9.98798	1.02927e-21	2.3587e-20	38.4643
STYX	-0.448384	4.95371	-9.98778	1.03106e-21	2.35951e-20	38.4626
LMBR1L	0.493061	5.53083	9.98587	1.048e-21	2.39492e-20	38.4465
DESI1	-0.434279	5.57889	-9.9782	1.11903e-21	2.55368e-20	38.3818
HJURP	-0.743723	5.42877	-9.97566	1.14355e-21	2.60602e-20	38.3605
ACER2	1.50882	5.39731	9.97531	1.14702e-21	2.6103e-20	38.3575
MMP12	-1.82743	5.18747	-9.97314	1.16847e-21	2.65544e-20	38.3392
ACOX1	0.83949	6.86549	9.97174	1.18247e-21	2.68353e-20	38.3275
ELOVL4	-0.994053	3.16509	-9.96926	1.20779e-21	2.73722e-20	38.3066
ELK3	-0.616668	5.38449	-9.96466	1.25623e-21	2.84305e-20	38.2678
AIMP2	-0.542388	6.42433	-9.96445	1.25844e-21	2.84414e-20	38.2661
SAMSN1	-0.870924	3.89087	-9.96204	1.28464e-21	2.89936e-20	38.2457
STC2	-0.933417	3.74501	-9.95982	1.30913e-21	2.95059e-20	38.2271
KLF4	-0.873813	4.88385	-9.95946	1.31318e-21	2.95564e-20	38.2241
ALDH1L2	-0.735919	2.74117	-9.94602	1.47266e-21	3.31006e-20	38.111
ABHD14A	0.606682	5.08262	9.9441	1.49705e-21	3.36027e-20	38.0949
DIAPH1	-0.517197	7.70518	-9.93733	1.58591e-21	3.55486e-20	38.038
BTBD16	2.00713	5.27445	9.93458	1.62349e-21	3.63413e-20	38.0149
MMP15	0.742731	5.55603	9.93424	1.62812e-21	3.63954e-20	38.0121
HOXB3	1.00947	4.19694	9.93408	1.63034e-21	3.63955e-20	38.0107
DDAH1	0.989793	5.0354	9.93293	1.64651e-21	3.67065e-20	38.001
MAPK10	0.847189	3.90099	9.93074	1.67747e-21	3.73424e-20	37.9827
PLEKHH1	0.840491	4.36052	9.93059	1.67959e-21	3.73424e-20	37.9814
CD14	-1.2311	5.86668	-9.92795	1.71774e-21	3.8139e-20	37.9593
UBE2D4	0.403227	4.38612	9.92242	1.80055e-21	3.99235e-20	37.9128
SLC25A5	-0.616429	9.94361	-9.92197	1.80754e-21	4.00245e-20	37.909
SKA3	-0.678129	4.7392	-9.90596	2.07118e-21	4.58004e-20	37.7748
MAPK12	-0.654777	2.86187	-9.90395	2.10684e-21	4.65229e-20	37.7579
KCTD1	-0.737583	3.91165	-9.9038	2.10952e-21	4.65229e-20	37.7567
COL9A2	1.15351	4.84121	9.90273	2.12876e-21	4.68841e-20	37.7477
RALA	-0.47292	6.76747	-9.89902	2.19708e-21	4.8324e-20	37.7166
SLC11A1	-0.718968	3.06818	-9.89836	2.20945e-21	4.85311e-20	37.7111
NPM3	-0.531954	6.22857	-9.89779	2.22004e-21	4.86985e-20	37.7063
ZNF620	0.580689	3.22184	9.89604	2.25346e-21	4.93654e-20	37.6916
ISG20	-0.831881	4.07797	-9.88878	2.39661e-21	5.23718e-20	37.6309
OIP5	-0.726684	4.30826	-9.88876	2.39707e-21	5.23718e-20	37.6307
STRIP2	-0.689623	3.26417	-9.88749	2.42316e-21	5.28712e-20	37.62
ADCY3	-0.597158	5.83061	-9.88722	2.42865e-21	5.29206e-20	37.6178
STX2	-0.717367	3.35052	-9.8833	2.5109e-21	5.46404e-20	37.585
CRYGS	0.539449	3.89173	9.88077	2.56534e-21	5.5751e-20	37.5638
SIGLEC12	-0.704117	2.42122	-9.86486	2.93607e-21	6.37236e-20	37.4307
CYP26B1	-0.929149	2.83661	-9.86281	2.98748e-21	6.47538e-20	37.4136
STAT1	-0.978128	8.20185	-9.86114	3.02992e-21	6.55869e-20	37.3997
CASP5	-0.447364	1.94085	-9.86004	3.05843e-21	6.61169e-20	37.3905
VGLL1	1.78562	6.78273	9.85929	3.07798e-21	6.64521e-20	37.3842
C5AR1	-0.811265	3.60681	-9.84794	3.38849e-21	7.30596e-20	37.2894
EIF4H	-0.529457	7.4628	-9.83788	3.68965e-21	7.94485e-20	37.2055
PDZD3	0.638329	2.16467	9.8365	3.73302e-21	8.02769e-20	37.194
NDE1	-0.659788	5.24562	-9.83558	3.76225e-21	8.07998e-20	37.1863
FRY	0.907239	4.67861	9.83527	3.77212e-21	8.09059e-20	37.1837
HSPA5	-0.55286	9.14037	-9.83365	3.82425e-21	8.19169e-20	37.1702
IL2RA	-0.914086	3.36095	-9.82987	3.94837e-21	8.44653e-20	37.1387
RRAD	-1.2703	3.64524	-9.82795	4.01289e-21	8.57338e-20	37.1227
C1orf74	-0.793228	4.49866	-9.82438	4.13589e-21	8.82467e-20	37.0929
UCHL5	-0.474858	4.78921	-9.82304	4.1832e-21	8.91402e-20	37.0817
CCDC88A	-0.705539	3.54392	-9.82114	4.2509e-21	9.04654e-20	37.0659
SGSM2	0.592197	6.19627	9.81902	4.32759e-21	9.19781e-20	37.0483
CFAP44	0.593179	3.61012	9.81664	4.41542e-21	9.36599e-20	37.0285
RNF186	0.860121	2.38833	9.81657	4.41814e-21	9.36599e-20	37.0279
ZNF211	0.65402	5.64447	9.81554	4.45673e-21	9.43561e-20	37.0193
PPM1N	0.966567	3.35489	9.81078	4.6395e-21	9.80992e-20	36.9797
DDX31	-0.394861	4.37024	-9.80828	4.73882e-21	1.0007e-19	36.9588
TICRR	-0.639536	4.13024	-9.80723	4.78104e-21	1.00832e-19	36.95
S100A7A	-1.19111	2.38649	-9.79906	5.12235e-21	1.07885e-19	36.8821
EPN3	0.991048	5.9318	9.79891	5.12862e-21	1.07885e-19	36.8809
CTSV	-1.23384	3.7431	-9.79675	5.22284e-21	1.09727e-19	36.8629
CKS1B	-0.808244	6.13284	-9.79593	5.25918e-21	1.10349e-19	36.8561
CSF2	-0.954169	2.61519	-9.7922	5.42736e-21	1.13732e-19	36.825
SAMD12	0.712544	3.28637	9.79195	5.43881e-21	1.13827e-19	36.823
TNFRSF10A	-0.697428	5.16272	-9.78854	5.59748e-21	1.16998e-19	36.7946
THEMIS2	-0.788712	3.70962	-9.78501	5.76684e-21	1.20286e-19	36.7652
NRARP	-0.924911	4.1133	-9.78495	5.76944e-21	1.20286e-19	36.7648
E2F7	-0.768853	4.01369	-9.77865	6.08418e-21	1.26687e-19	36.7124
TPI1	-0.606382	10.3538	-9.77697	6.17104e-21	1.28333e-19	36.6985
TSGA10	0.477468	3.07324	9.77498	6.2755e-21	1.3034e-19	36.6819
PEX11G	0.493532	4.10799	9.77477	6.28628e-21	1.30399e-19	36.6802
PPP4R4	-0.653798	1.99233	-9.77376	6.34019e-21	1.31351e-19	36.6718
SSH3	0.890817	7.32758	9.77149	6.46223e-21	1.3371e-19	36.653
PLA2G4F	0.965937	4.02703	9.77059	6.51145e-21	1.34559e-19	36.6455
COL5A2	-1.20354	7.01835	-9.76965	6.56356e-21	1.35465e-19	36.6377
FJX1	-0.823127	4.29364	-9.76857	6.62317e-21	1.36524e-19	36.6288
SLC38A5	-1.32131	4.22541	-9.76685	6.71981e-21	1.38342e-19	36.6145
TAP1	-1.10253	7.90963	-9.76374	6.8984e-21	1.41841e-19	36.5886
FOXD1	-1.091	2.87745	-9.76004	7.11653e-21	1.46143e-19	36.5579
ZNF320	0.764938	4.68354	9.75634	7.34168e-21	1.50578e-19	36.5272
GNAI3	-0.462265	5.41813	-9.75515	7.41553e-21	1.51903e-19	36.5174
PALLD	-0.935949	5.77373	-9.75283	7.56169e-21	1.54703e-19	36.4981
HPSE	-0.796417	3.11901	-9.73615	8.69993e-21	1.77769e-19	36.3599
CRTAC1	2.09361	4.14657	9.73467	8.80872e-21	1.79768e-19	36.3477
NCS1	-0.694673	5.14597	-9.73034	9.13469e-21	1.86189e-19	36.3119
LIMCH1	1.13292	5.64196	9.72269	9.74038e-21	1.98288e-19	36.2486
COL5A3	-0.905168	4.08955	-9.71739	1.01841e-20	2.07065e-19	36.2047
TM4SF1	-1.35639	7.25354	-9.71674	1.02397e-20	2.07936e-19	36.1993
SATB1	0.797782	4.52243	9.71591	1.03111e-20	2.09128e-19	36.1925
PIK3IP1	0.787574	6.09565	9.7157	1.03292e-20	2.09237e-19	36.1907
AP3S1	-0.624213	6.41398	-9.71467	1.04187e-20	2.1079e-19	36.1822
MXD1	-0.762492	4.87707	-9.71452	1.04316e-20	2.1079e-19	36.181
ZNF559	0.494276	4.66588	9.70948	1.08827e-20	2.19634e-19	36.1393
MCCC1	0.659445	6.53809	9.70014	1.17682e-20	2.37215e-19	36.0622
RAB40C	0.474998	5.51339	9.69388	1.2402e-20	2.49683e-19	36.0105
YWHAQ	-0.620163	9.30838	-9.69298	1.24963e-20	2.51069e-19	36.003
UBQLN1	-0.492996	6.90254	-9.69293	1.25014e-20	2.51069e-19	36.0026
LILRA5	-0.775949	2.84002	-9.69263	1.25332e-20	2.514e-19	36.0001
ZNF10	0.589668	3.89809	9.69124	1.26793e-20	2.5402e-19	35.9887
KRTAP5-7	0.815732	2.73736	9.69064	1.27432e-20	2.54989e-19	35.9837
STARD4	-0.719065	3.02164	-9.6864	1.32038e-20	2.63883e-19	35.9487
ZNF774	0.428157	2.77581	9.68597	1.32513e-20	2.6451e-19	35.9452
CD163	-1.19561	4.18378	-9.68476	1.33869e-20	2.66893e-19	35.9352
TPM3	-0.478322	7.91883	-9.68453	1.34126e-20	2.67079e-19	35.9333
RABEP2	0.480703	5.20656	9.68371	1.35051e-20	2.68597e-19	35.9265
PDE9A	1.02722	4.20461	9.68303	1.35818e-20	2.69794e-19	35.9209
PSMA6	-0.479626	6.39942	-9.68267	1.3623e-20	2.70286e-19	35.9179
SMAD6	0.916507	3.7825	9.68132	1.37772e-20	2.72906e-19	35.9068
MTDH	-0.571769	6.8139	-9.68123	1.37883e-20	2.72906e-19	35.906
DNAJA4	0.772759	6.70466	9.68078	1.384e-20	2.73598e-19	35.9024
TP53INP1	0.655307	5.56575	9.67925	1.40186e-20	2.76796e-19	35.8897
S100A9	-2.11117	9.44467	-9.67803	1.41623e-20	2.79297e-19	35.8797
PMAIP1	-0.875698	4.52657	-9.6757	1.44408e-20	2.84447e-19	35.8605
NUSAP1	-0.849295	6.46763	-9.66929	1.52358e-20	2.99747e-19	35.8077
CENPI	-0.621479	4.07591	-9.66854	1.53325e-20	3.01289e-19	35.8014
PSRC1	-0.590498	4.21257	-9.66529	1.57545e-20	3.0921e-19	35.7747
ARHGAP27	0.565204	5.22958	9.66245	1.61328e-20	3.16256e-19	35.7513
EMP3	-1.04733	6.04136	-9.66184	1.62157e-20	3.17503e-19	35.7462
SPDL1	-0.529057	4.77516	-9.6613	1.62887e-20	3.18551e-19	35.7418
DSCC1	-0.703749	4.67953	-9.66037	1.64162e-20	3.20664e-19	35.7341
UBLCP1	-0.560731	5.92089	-9.647	1.83558e-20	3.58123e-19	35.6241
SNAI1	-0.675246	3.40291	-9.63833	1.9733e-20	3.84535e-19	35.5528
PKHD1	0.746002	2.57758	9.6342	2.04236e-20	3.97522e-19	35.5189
GRHL3	1.48868	6.17866	9.63208	2.07887e-20	4.04148e-19	35.5014
SPAG4	0.851202	5.23107	9.63157	2.08778e-20	4.054e-19	35.4972
ZNF792	0.597424	3.58222	9.63142	2.09036e-20	4.05422e-19	35.496
S100A16	-1.02483	8.70059	-9.62612	2.18482e-20	4.23241e-19	35.4524
GNLY	-1.15677	3.35439	-9.62571	2.19215e-20	4.24161e-19	35.4491
ADAMTS4	-0.816105	3.41803	-9.62425	2.21911e-20	4.28872e-19	35.4371
NAB1	-0.6498	5.68152	-9.62309	2.24062e-20	4.3252e-19	35.4276
GPR176	-0.743643	3.13708	-9.62163	2.26808e-20	4.37042e-19	35.4155
SCCPDH	0.996716	8.02924	9.62156	2.26938e-20	4.37042e-19	35.415
EPOR	0.731088	4.111	9.61892	2.31986e-20	4.4624e-19	35.3933
TGFB2	-0.669789	2.5048	-9.61481	2.40062e-20	4.61234e-19	35.3596
ST3GAL6	-0.558742	2.62119	-9.61324	2.43222e-20	4.66759e-19	35.3467
MZF1	0.536809	4.78923	9.6121	2.45541e-20	4.70659e-19	35.3373
POMP	-0.455761	9.03293	-9.60571	2.58956e-20	4.95794e-19	35.2849
TEX10	-0.447463	5.24027	-9.60441	2.61778e-20	5.00613e-19	35.2742
SLC22A5	0.581108	4.42027	9.60378	2.63163e-20	5.02676e-19	35.269
ARVCF	0.6146	3.83884	9.6015	2.68188e-20	5.11678e-19	35.2504
SYT17	0.840283	4.64453	9.59927	2.73218e-20	5.20669e-19	35.2321
RPS6KA6	0.732363	3.12677	9.59334	2.87022e-20	5.46341e-19	35.1835
RNF145	-0.79944	5.91445	-9.58833	2.99235e-20	5.68928e-19	35.1425
FBXO5	-0.655747	4.68025	-9.58742	3.01519e-20	5.72608e-19	35.135
BHLHE40	-0.871705	8.35731	-9.58669	3.03355e-20	5.75073e-19	35.129
MOGAT2	0.944358	2.47938	9.58662	3.03518e-20	5.75073e-19	35.1285
MMS22L	-0.434631	3.41604	-9.58609	3.04876e-20	5.76978e-19	35.1241
IFIH1	-0.912658	5.32649	-9.58501	3.07603e-20	5.81469e-19	35.1153
FPR1	-0.94604	3.67183	-9.58324	3.12177e-20	5.89437e-19	35.1007
PCYT1A	-0.371951	5.7565	-9.5831	3.12543e-20	5.89448e-19	35.0996
MTHFD1	-0.503864	6.52027	-9.58103	3.17951e-20	5.9896e-19	35.0827
CD80	-0.566931	2.4652	-9.57848	3.24761e-20	6.11088e-19	35.0618
RGS1	-1.22087	5.09216	-9.57795	3.26192e-20	6.13077e-19	35.0575
PBXIP1	0.551743	6.89222	9.57616	3.31089e-20	6.21568e-19	35.0428
GZMB	-1.28923	4.24664	-9.57555	3.32762e-20	6.23995e-19	35.0378
MMP9	-1.52811	5.25577	-9.57241	3.41569e-20	6.39779e-19	35.0121
DSC3	-2.11018	4.65083	-9.56922	3.50723e-20	6.56176e-19	34.986
CXCL5	-1.20158	2.82529	-9.5689	3.51653e-20	6.57166e-19	34.9834
PCMT1	-0.481454	6.64171	-9.56618	3.59697e-20	6.71435e-19	34.9611
NTMT1	-0.441775	4.46659	-9.56599	3.60269e-20	6.71737e-19	34.9596
TPM4	-0.590278	8.06265	-9.56369	3.67212e-20	6.83906e-19	34.9408
OSBPL7	0.588151	4.585	9.55782	3.8554e-20	7.17227e-19	34.8928
CXXC1	0.563962	6.83569	9.55562	3.92631e-20	7.29591e-19	34.8748
SAV1	-0.517498	5.0755	-9.55389	3.98307e-20	7.393e-19	34.8607
DYRK3	-0.56082	3.44537	-9.54239	4.38143e-20	8.12322e-19	34.7667
MECOM	1.08988	6.37369	9.53204	4.77335e-20	8.83986e-19	34.6823
PTTG2	0.557213	2.67076	9.53094	4.81706e-20	8.91074e-19	34.6733
RPF2	-0.424272	6.28375	-9.52823	4.92649e-20	9.10292e-19	34.6512
DCBLD1	-0.709528	4.75516	-9.52287	5.14969e-20	9.50462e-19	34.6076
XRCC4	-0.423523	4.28318	-9.52047	5.25326e-20	9.68488e-19	34.5879
ADCY6	0.675632	5.3029	9.51324	5.57653e-20	1.02693e-18	34.5291
HIP1R	0.539028	6.19535	9.50722	5.86118e-20	1.07814e-18	34.48
SMIM13	-0.469533	4.18346	-9.50521	5.95955e-20	1.09396e-18	34.4636
RNF208	0.64496	4.52356	9.50519	5.96051e-20	1.09396e-18	34.4635
UHRF1	-0.77941	4.77223	-9.50286	6.07625e-20	1.11396e-18	34.4445
LILRA6	-0.541856	2.39693	-9.49984	6.22968e-20	1.14081e-18	34.42
GDPGP1	0.404141	3.55968	9.4995	6.24729e-20	1.14276e-18	34.4172
NEK2	-0.748794	4.99051	-9.4993	6.25774e-20	1.1434e-18	34.4155
SAA1	-1.84097	4.22892	-9.49749	6.35161e-20	1.15926e-18	34.4009
DPYD	-1.04347	4.46996	-9.49703	6.37623e-20	1.16246e-18	34.3971
NEDD4L	0.724308	5.59347	9.49678	6.38935e-20	1.16356e-18	34.395
IFI16	-1.19595	7.07164	-9.49531	6.46748e-20	1.17648e-18	34.3831
POLE2	-0.621077	4.39413	-9.49319	6.58167e-20	1.19593e-18	34.3658
SLC2A3	-1.06329	5.37239	-9.48792	6.87409e-20	1.24768e-18	34.323
TNFRSF18	-0.95777	3.4576	-9.48631	6.96604e-20	1.26196e-18	34.3099
HS3ST6	1.1533	2.99081	9.48627	6.96814e-20	1.26196e-18	34.3096
NLRP3	-0.587837	2.84113	-9.48462	7.06365e-20	1.27784e-18	34.2962
ZNF224	0.473593	4.42214	9.48015	7.32899e-20	1.32438e-18	34.2599
NRBF2	-0.473936	5.05526	-9.47764	7.48262e-20	1.35066e-18	34.2394
MYEOV	-1.42859	3.61498	-9.47357	7.73797e-20	1.39522e-18	34.2064
CCL8	-1.08528	3.3057	-9.46973	7.98651e-20	1.43845e-18	34.1752
GPX8	-0.890602	4.30455	-9.46182	8.52449e-20	1.53366e-18	34.111
CSF3	-0.835221	2.26499	-9.45825	8.77882e-20	1.57769e-18	34.082
FCER1G	-1.16694	6.21181	-9.45522	9.00057e-20	1.61577e-18	34.0575
KLF15	0.779749	2.97165	9.45371	9.11315e-20	1.63419e-18	34.0452
HCK	-0.931447	3.98539	-9.45332	9.14197e-20	1.63757e-18	34.0421
ZNF254	0.67664	4.4883	9.45052	9.35565e-20	1.67402e-18	34.0194
DEPDC7	-0.82223	2.94833	-9.44723	9.61214e-20	1.71804e-18	33.9927
TMEM51	0.683911	7.28964	9.44553	9.74752e-20	1.74034e-18	33.9789
ITGA2	-1.11479	6.06637	-9.44475	9.80986e-20	1.74957e-18	33.9727
LAMP2	-0.702888	6.70991	-9.44386	9.88264e-20	1.76063e-18	33.9654
ZNF429	0.594627	4.38349	9.43987	1.02116e-19	1.81727e-18	33.9331
TMEM219	0.456491	7.68227	9.43956	1.02379e-19	1.81997e-18	33.9306
PES1	-0.458865	6.89913	-9.43406	1.07113e-19	1.90207e-18	33.8861
BCAP29	-0.40194	4.66708	-9.43355	1.07569e-19	1.9081e-18	33.8819
FREM2	1.25071	3.12435	9.4326	1.08406e-19	1.92088e-18	33.8742
ACSM1	0.404309	2.16299	9.43163	1.09277e-19	1.93422e-18	33.8663
GRPEL2	-0.460855	5.06047	-9.43006	1.10696e-19	1.95722e-18	33.8536
PWP1	-0.365191	7.455	-9.42953	1.1118e-19	1.96367e-18	33.8493
SLC7A11	-0.931253	3.02079	-9.42692	1.1359e-19	2.00407e-18	33.8282
S100P	1.7354	10.274	9.41781	1.22415e-19	2.15744e-18	33.7545
IP6K2	0.518801	5.90245	9.41699	1.23242e-19	2.16969e-18	33.7479
ZYX	-0.565979	7.80597	-9.4152	1.25058e-19	2.19931e-18	33.7335
EIF4G1	-0.432233	8.49019	-9.40991	1.30609e-19	2.29447e-18	33.6907
LAG3	-1.01675	3.44403	-9.40641	1.3442e-19	2.3589e-18	33.6624
NOP56	-0.496606	7.93419	-9.40507	1.35898e-19	2.38229e-18	33.6516
ATAT1	0.484129	4.10752	9.40356	1.37596e-19	2.40948e-18	33.6394
PINX1	-0.370668	3.67776	-9.40162	1.39798e-19	2.44526e-18	33.6237
ZNF563	0.401787	3.27902	9.40145	1.4e-19	2.44526e-18	33.6223
ICAM1	-1.10574	5.21559	-9.40137	1.40087e-19	2.44526e-18	33.6217
PSMB9	-1.17689	5.76295	-9.39511	1.4747e-19	2.5714e-18	33.5711
MT1G	-1.378	4.13847	-9.39216	1.51067e-19	2.62866e-18	33.5474
FCGR3A	-1.19153	4.92476	-9.39216	1.51074e-19	2.62866e-18	33.5473
TMC7	0.924112	4.45404	9.38926	1.54701e-19	2.68892e-18	33.5239
OR10H1	0.691475	2.32548	9.38767	1.56739e-19	2.71901e-18	33.5111
HSPA4L	-0.854601	3.68197	-9.38765	1.56764e-19	2.71901e-18	33.5109
AP2S1	-0.456157	8.0454	-9.3873	1.57204e-19	2.72376e-18	33.5081
SRM	-0.470561	7.37503	-9.38523	1.59894e-19	2.76744e-18	33.4914
APCDD1L	-0.787159	2.21967	-9.38425	1.61179e-19	2.78674e-18	33.4835
PHGR1	1.56461	3.26359	9.37903	1.68217e-19	2.90537e-18	33.4414
FNBP1L	0.64846	6.33062	9.37583	1.72685e-19	2.9794e-18	33.4156
RGS2	-0.963336	5.78535	-9.36934	1.82099e-19	3.13854e-18	33.3633
SLC22A3	-0.84434	2.69293	-9.3684	1.8351e-19	3.15953e-18	33.3557
HES2	-1.21795	3.37228	-9.36404	1.90178e-19	3.27091e-18	33.3206
FAM210A	-0.513906	4.6765	-9.36294	1.91886e-19	3.29682e-18	33.3118
MT1M	-1.10577	3.22392	-9.36279	1.92118e-19	3.29736e-18	33.3106
RRP15	-0.459555	4.74171	-9.36261	1.92407e-19	3.29886e-18	33.3091
B3GNT5	-0.768986	4.56396	-9.36247	1.92624e-19	3.29914e-18	33.308
KLHL5	-0.731444	4.73295	-9.36195	1.93443e-19	3.30971e-18	33.3038
SLC26A5	0.408092	2.00221	9.3612	1.94636e-19	3.32665e-18	33.2978
MFSD6L	0.784376	2.75768	9.35855	1.98899e-19	3.39598e-18	33.2764
KIR2DL4	-0.514535	2.07391	-9.35276	2.08535e-19	3.5568e-18	33.2298
SYT12	-0.818743	2.56191	-9.34536	2.21536e-19	3.77462e-18	33.1703
NRP1	-0.790803	4.71585	-9.3395	2.32377e-19	3.95524e-18	33.1232
NOP2	-0.434735	6.42839	-9.33886	2.33591e-19	3.97177e-18	33.1181
ATP8B1	0.841368	6.55986	9.33863	2.34047e-19	3.9754e-18	33.1162
YKT6	-0.418796	6.67357	-9.33663	2.37884e-19	4.03639e-18	33.1001
MYO10	-0.862851	5.65558	-9.33623	2.38672e-19	4.04559e-18	33.0969
CHSY3	-0.570212	2.69335	-9.33466	2.41746e-19	4.09347e-18	33.0843
RGL2	0.49067	6.48582	9.33367	2.43708e-19	4.12244e-18	33.0763
DTX4	0.879016	5.35777	9.3262	2.59015e-19	4.37685e-18	33.0163
HTRA3	-1.11433	4.44302	-9.32519	2.61157e-19	4.4085e-18	33.0082
NXN	-0.970967	4.70192	-9.32247	2.67013e-19	4.50272e-18	32.9864
ZNF708	0.557376	4.16733	9.32147	2.69191e-19	4.5348e-18	32.9784
ZFP2	0.425498	2.51753	9.3109	2.93409e-19	4.93769e-18	32.8935
PDLIM4	-0.985231	3.90453	-9.30872	2.98649e-19	5.02072e-18	32.8761
UCK2	-0.581181	5.73859	-9.30762	3.01336e-19	5.06072e-18	32.8673
TNFAIP3	-0.902041	5.47988	-9.30395	3.1048e-19	5.20895e-18	32.8378
SLC39A8	-0.783334	4.07279	-9.30148	3.16798e-19	5.30952e-18	32.818
PVR	-0.65703	5.4623	-9.2983	3.25091e-19	5.44295e-18	32.7925
NOP58	-0.422654	7.68033	-9.29709	3.28311e-19	5.49126e-18	32.7828
PPP4R1	-0.545709	6.94984	-9.28794	3.53671e-19	5.90941e-18	32.7096
TMEM62	0.529141	5.80514	9.28776	3.54173e-19	5.91176e-18	32.7082
SRP72	-0.429708	7.0714	-9.28668	3.57318e-19	5.9582e-18	32.6995
ADIPOR2	-0.472804	6.45581	-9.28368	3.66127e-19	6.09889e-18	32.6755
RPL26L1	-0.473855	5.80173	-9.28352	3.66592e-19	6.10045e-18	32.6742
PSMC1	-0.480831	5.60419	-9.26924	4.11697e-19	6.84409e-18	32.56
SLC23A2	0.757414	5.17537	9.26851	4.14141e-19	6.87775e-18	32.5541
ADK	-0.540914	6.40313	-9.26109	4.39836e-19	7.29709e-18	32.4949
RAD51AP1	-0.790002	4.88685	-9.26011	4.43351e-19	7.34799e-18	32.487
SRD5A1	-0.680545	4.15774	-9.25874	4.48315e-19	7.42276e-18	32.4761
EPHB4	-0.630725	6.0353	-9.25808	4.50719e-19	7.45503e-18	32.4708
ZNF226	0.416875	4.70263	9.25503	4.62009e-19	7.63408e-18	32.4464
GNPNAT1	-0.520687	5.12849	-9.2547	4.63224e-19	7.64645e-18	32.4438
SLC25A15	-0.535475	4.58649	-9.25457	4.63726e-19	7.64704e-18	32.4428
SPP1	-1.55337	7.38239	-9.24705	4.92864e-19	8.11938e-18	32.3828
GDPD3	1.28175	5.59533	9.24666	4.94444e-19	8.13725e-18	32.3796
POLE3	-0.535055	6.79345	-9.24118	5.16855e-19	8.49755e-18	32.336
TUBA1B	-0.69938	9.90412	-9.23674	5.35796e-19	8.80013e-18	32.3005
SLC10A6	-0.796118	2.46342	-9.23474	5.44536e-19	8.93475e-18	32.2846
CCDC160	0.519506	2.30274	9.22986	5.66501e-19	9.28586e-18	32.2457
NDST1	-0.585253	5.26994	-9.22557	5.86506e-19	9.60418e-18	32.2115
NSUN6	0.574006	5.3081	9.22134	6.06902e-19	9.92827e-18	32.1778
GORASP1	0.416078	5.4354	9.22107	6.08216e-19	9.93985e-18	32.1757
FOXQ1	1.40675	6.7414	9.22044	6.11343e-19	9.98101e-18	32.1706
TBC1D1	0.608949	5.54679	9.21875	6.19736e-19	1.0108e-17	32.1572
CEP128	-0.418474	3.73667	-9.21367	6.45742e-19	1.05217e-17	32.1167
NUDCD1	-0.482378	4.90159	-9.21316	6.48432e-19	1.0555e-17	32.1127
NPAS2	0.809022	5.33768	9.21098	6.59932e-19	1.07316e-17	32.0953
MMP1	-1.89857	6.10741	-9.20474	6.94071e-19	1.12756e-17	32.0457
NUDT1	-0.516682	6.36194	-9.20275	7.05312e-19	1.14468e-17	32.0299
IPO4	-0.404974	4.51088	-9.20116	7.14418e-19	1.15832e-17	32.0172
CENPH	-0.565416	4.9462	-9.19821	7.31636e-19	1.18506e-17	31.9938
DIP2B	-0.536621	5.31521	-9.19557	7.47429e-19	1.20945e-17	31.9728
RUNX3	-0.795331	3.19864	-9.19304	7.6284e-19	1.23317e-17	31.9527
ALOX5AP	-1.08921	4.97425	-9.18621	8.06016e-19	1.30168e-17	31.8985
MUC20	1.35836	5.92297	9.18351	8.23765e-19	1.32904e-17	31.877
IMPA2	-0.930909	5.42389	-9.18183	8.35005e-19	1.34585e-17	31.8637
RALGAPA2	0.823278	5.36671	9.17859	8.57123e-19	1.38014e-17	31.8379
PSMA3	-0.440935	7.73915	-9.17632	8.72938e-19	1.40423e-17	31.8199
DCLRE1B	-0.500474	4.0378	-9.17471	8.84338e-19	1.42118e-17	31.8072
SLC19A2	0.695621	5.5429	9.17446	8.86145e-19	1.42269e-17	31.8052
KIFC1	-0.682046	5.29526	-9.17004	9.18211e-19	1.47273e-17	31.7702
CD38	-0.858726	3.02898	-9.16629	9.46428e-19	1.5165e-17	31.7404
SLAIN1	0.790115	3.16994	9.16457	9.59578e-19	1.53607e-17	31.7268
CHCHD3	-0.491428	6.23807	-9.16331	9.69373e-19	1.55024e-17	31.7168
SGSM3	0.427482	5.94117	9.16254	9.75424e-19	1.5584e-17	31.7106
TOB1	0.790877	7.62326	9.16145	9.83983e-19	1.57054e-17	31.702
RHBDF2	-0.544868	5.39	-9.16039	9.92436e-19	1.5825e-17	31.6936
COL7A1	-1.24505	6.93785	-9.15969	9.98039e-19	1.58989e-17	31.6881
SLC35F2	-0.701303	4.83538	-9.15584	1.02948e-18	1.63839e-17	31.6575
C2CD2	0.595957	5.71797	9.15255	1.05708e-18	1.68067e-17	31.6315
KRT9	-0.730515	2.37681	-9.15204	1.06139e-18	1.68483e-17	31.6275
CNTN3	0.959101	2.94648	9.152	1.06174e-18	1.68483e-17	31.6272
GTF2F2	-0.417018	6.06425	-9.15115	1.06909e-18	1.69484e-17	31.6204
ZNF738	0.625895	4.0487	9.14527	1.12078e-18	1.77508e-17	31.5739
PGAM1	-0.659212	5.33224	-9.14446	1.12812e-18	1.78498e-17	31.5675
ZBTB8B	0.599948	2.39069	9.14004	1.16898e-18	1.84784e-17	31.5324
MCTS1	-0.47738	5.88346	-9.13935	1.17542e-18	1.85512e-17	31.527
PRR16	-0.594636	2.75409	-9.13931	1.17585e-18	1.85512e-17	31.5267
ZMYND12	0.535171	2.80268	9.13852	1.1833e-18	1.86508e-17	31.5205
PLOD1	-0.572208	8.08575	-9.13718	1.19607e-18	1.88341e-17	31.5099
CD209	-0.818012	3.13257	-9.1358	1.20942e-18	1.90253e-17	31.499
CSAD	0.61221	4.93281	9.13564	1.21101e-18	1.90253e-17	31.4977
SMS	-0.655608	8.02673	-9.13557	1.21169e-18	1.90253e-17	31.4971
LILRB2	-0.685179	2.71888	-9.13258	1.24116e-18	1.94693e-17	31.4735
AKIRIN2	-0.430907	6.48114	-9.12997	1.26744e-18	1.98627e-17	31.4528
CISD1	-0.476952	4.72606	-9.12697	1.29834e-18	2.03275e-17	31.4291
AGFG1	-0.583073	5.25611	-9.12388	1.331e-18	2.08189e-17	31.4047
POU5F1	1.09065	4.10412	9.12291	1.34135e-18	2.09609e-17	31.397
AIFM3	0.755528	3.37357	9.12266	1.34404e-18	2.09829e-17	31.3951
UBE2V2	-0.48975	5.56013	-9.12076	1.36468e-18	2.12849e-17	31.3801
PCMTD1	0.532206	6.3841	9.11825	1.39247e-18	2.16977e-17	31.3602
WSCD2	0.917846	2.71466	9.11628	1.41465e-18	2.20223e-17	31.3447
GPX2	2.05877	8.13479	9.11483	1.43122e-18	2.22592e-17	31.3332
CIT	-0.613048	4.512	-9.10921	1.49722e-18	2.32636e-17	31.2888
RCOR1	-0.489438	4.90982	-9.10771	1.51524e-18	2.3508e-17	31.277
CTHRC1	-1.36864	6.37982	-9.10761	1.51645e-18	2.3508e-17	31.2763
CLSPN	-0.667179	4.02555	-9.10755	1.51725e-18	2.3508e-17	31.2757
HAT1	-0.540205	5.60352	-9.10198	1.58655e-18	2.45585e-17	31.2318
PDE4B	-0.541904	2.61554	-9.10141	1.5938e-18	2.46476e-17	31.2273
CDK5R1	-0.753465	3.84512	-9.10107	1.59806e-18	2.46902e-17	31.2247
KPNB1	-0.416752	8.39652	-9.10031	1.60781e-18	2.48175e-17	31.2187
NKTR	0.572363	5.84929	9.09948	1.61853e-18	2.49594e-17	31.2121
ARSD	0.715516	5.2521	9.09755	1.64379e-18	2.53251e-17	31.1969
PRDX4	-0.656069	7.76261	-9.09311	1.7033e-18	2.62174e-17	31.1619
SYTL2	0.847322	4.40463	9.09084	1.73458e-18	2.66739e-17	31.144
FAM20A	-0.802198	3.22177	-9.08881	1.76296e-18	2.70848e-17	31.128
ALAS1	0.670001	7.08018	9.08765	1.77938e-18	2.73116e-17	31.1189
CTSE	1.92391	4.40817	9.0868	1.79155e-18	2.74727e-17	31.1122
TTL	-0.474867	4.55882	-9.08519	1.81483e-18	2.78036e-17	31.0995
FGD6	-0.636303	4.04831	-9.08151	1.86896e-18	2.86063e-17	31.0705
PNO1	-0.430797	5.79688	-9.08125	1.87288e-18	2.86395e-17	31.0685
IL11	-0.656564	2.73726	-9.07952	1.89901e-18	2.9012e-17	31.0548
POLR1E	-0.498023	5.63914	-9.07872	1.91121e-18	2.91712e-17	31.0485
ACSS1	0.720093	4.57708	9.07841	1.91599e-18	2.9217e-17	31.0461
THYN1	0.437091	6.68901	9.07809	1.92091e-18	2.92648e-17	31.0435
SUMO3	-0.474118	7.52542	-9.07787	1.92425e-18	2.92886e-17	31.0418
PGAM5	-0.445248	5.9104	-9.07463	1.97474e-18	3.00292e-17	31.0163
MSANTD2	0.466465	3.9114	9.07237	2.01075e-18	3.05485e-17	30.9985
PKP3	-0.735456	6.38927	-9.06201	2.18425e-18	3.31538e-17	30.9171
GTPBP4	-0.469062	6.95509	-9.06017	2.21665e-18	3.36144e-17	30.9026
RASSF9	-0.7472	2.3864	-9.05723	2.2692e-18	3.43796e-17	30.8795
KPNA2	-0.616359	7.37418	-9.05329	2.34186e-18	3.54476e-17	30.8485
OSCAR	-0.679256	2.86877	-9.05085	2.38779e-18	3.61096e-17	30.8294
SBSN	-1.89262	3.96475	-9.04988	2.40639e-18	3.63573e-17	30.8217
GEMIN2	-0.47796	4.75784	-9.04699	2.46258e-18	3.7172e-17	30.799
PAEP	-0.639448	1.92496	-9.04191	2.56427e-18	3.86715e-17	30.7592
MSI2	0.571458	4.80436	9.04032	2.59712e-18	3.91309e-17	30.7467
TPCN1	0.591434	5.20149	9.03924	2.61959e-18	3.94332e-17	30.7382
IKZF2	0.725562	4.3259	9.03787	2.64827e-18	3.98285e-17	30.7275
EGR3	-0.559475	2.63543	-9.03681	2.67071e-18	4.01291e-17	30.7192
PDE7B	0.745331	3.42055	9.02855	2.85244e-18	4.28206e-17	30.6544
DHRS9	-1.13863	2.89282	-9.02208	3.00331e-18	4.50441e-17	30.6037
SERPINB5	-1.48827	6.44854	-9.01585	3.15606e-18	4.72919e-17	30.5548
CXCL9	-1.62142	4.54658	-9.01519	3.1726e-18	4.74963e-17	30.5497
NIFK	-0.407429	7.00753	-9.0132	3.22339e-18	4.82127e-17	30.5341
PLEKHH3	0.559352	5.5445	9.01228	3.24705e-18	4.85224e-17	30.5269
TSPAN15	0.738834	6.70023	9.01175	3.2608e-18	4.86836e-17	30.5227
IFI27	-1.57097	7.00046	-9.01045	3.29448e-18	4.91416e-17	30.5126
TRIM47	-0.812064	4.99108	-9.00934	3.32384e-18	4.95345e-17	30.5039
MCEMP1	-0.546665	2.28757	-9.00909	3.33056e-18	4.95897e-17	30.5019
SWSAP1	0.405118	3.96286	9.00806	3.3579e-18	4.99514e-17	30.4938
SGMS2	-0.694033	3.88722	-9.00776	3.36581e-18	5.00237e-17	30.4915
CXADR	0.92155	6.61173	9.00629	3.4054e-18	5.05664e-17	30.48
LMNB1	-0.6895	6.41888	-9.00205	3.52216e-18	5.22528e-17	30.4468
ZNF441	0.397475	3.61386	9.00064	3.56193e-18	5.27951e-17	30.4358
IL27RA	-0.810728	4.15691	-8.9996	3.59152e-18	5.31855e-17	30.4276
ZNF862	0.469421	3.39555	8.99881	3.61419e-18	5.34731e-17	30.4214
DCBLD2	-0.972299	4.81772	-8.9985	3.6229e-18	5.35537e-17	30.4191
RAP2C	-0.410448	4.78603	-8.99804	3.63618e-18	5.37016e-17	30.4155
PLK4	-0.584211	4.78646	-8.99696	3.66771e-18	5.41185e-17	30.407
MCM6	-0.637811	6.07993	-8.9938	3.76091e-18	5.54439e-17	30.3823
TLE6	0.955361	3.48835	8.99359	3.76723e-18	5.54872e-17	30.3806
NPDC1	0.821095	5.91649	8.98845	3.92416e-18	5.77468e-17	30.3405
IL7R	-0.987337	3.85479	-8.9877	3.94746e-18	5.80375e-17	30.3346
BATF	0.841203	6.34763	8.98591	4.00417e-18	5.88187e-17	30.3206
THBD	-1.15159	5.9037	-8.98484	4.03821e-18	5.92655e-17	30.3123
LUC7L	0.518696	5.63044	8.98449	4.04939e-18	5.93765e-17	30.3096
SMIM5	0.782616	3.14983	8.98388	4.06914e-18	5.9613e-17	30.3048
TXNRD1	-0.86376	5.50692	-8.9819	4.13369e-18	6.05045e-17	30.2893
ARPC5L	-0.457816	6.73299	-8.98117	4.15754e-18	6.07994e-17	30.2836
MRPL37	-0.459368	7.65585	-8.9778	4.27019e-18	6.23911e-17	30.2573
CCT7	-0.416154	8.35697	-8.97765	4.27535e-18	6.2411e-17	30.2561
C9orf40	-0.624471	3.89553	-8.97632	4.3206e-18	6.30154e-17	30.2458
RFC4	-0.626756	6.29616	-8.97581	4.33827e-18	6.31797e-17	30.2417
ITGA6	-0.862441	6.41082	-8.97577	4.33956e-18	6.31797e-17	30.2414
CDCA3	-0.642953	4.32642	-8.97391	4.40417e-18	6.40635e-17	30.2269
TMEM8B	0.487441	4.25272	8.97347	4.41959e-18	6.42309e-17	30.2235
METTL8	-0.400034	3.84026	-8.97322	4.42823e-18	6.42994e-17	30.2215
KLF16	-0.359872	4.59828	-8.96994	4.54476e-18	6.59332e-17	30.196
PLLP	0.77804	3.92538	8.96504	4.72483e-18	6.8485e-17	30.1577
MPND	0.482012	6.18039	8.96393	4.76666e-18	6.90303e-17	30.1491
MED27	-0.424007	4.98082	-8.96315	4.7963e-18	6.93983e-17	30.143
FOXN2	-0.506312	4.767	-8.96236	4.82654e-18	6.97743e-17	30.1368
MYO5A	-0.682948	4.59714	-8.9616	4.85549e-18	7.01311e-17	30.1309
PPM1L	0.591969	3.49143	8.95985	4.92344e-18	7.105e-17	30.1172
PRR15	1.00525	4.10246	8.95958	4.93399e-18	7.10711e-17	30.1151
ACSL5	1.08551	7.25931	8.95953	4.93593e-18	7.10711e-17	30.1147
RHOF	-0.593475	2.65126	-8.95948	4.9379e-18	7.10711e-17	30.1143
PCBD1	0.564401	7.43933	8.95831	4.98374e-18	7.1668e-17	30.1052
BHLHE41	1.09073	6.33593	8.9541	5.15258e-18	7.40312e-17	30.0725
FA2H	0.985176	4.19144	8.94647	5.47339e-18	7.85716e-17	30.013
ZNF626	1.16912	4.41058	8.94427	5.56985e-18	7.98864e-17	29.9958
HS3ST3A1	-0.55926	2.05862	-8.94402	5.58079e-18	7.99734e-17	29.9939
AGPS	-0.456109	5.64765	-8.94073	5.72773e-18	8.20075e-17	29.9683
TTLL12	-0.500167	6.5997	-8.93904	5.80512e-18	8.30431e-17	29.9551
ARHGEF4	-1.00081	3.20129	-8.93754	5.87427e-18	8.39591e-17	29.9435
UBE2C	-0.840806	7.48234	-8.93662	5.91693e-18	8.44951e-17	29.9364
TNFSF15	0.720447	3.06192	8.93633	5.93076e-18	8.46191e-17	29.9341
SH2B1	0.475255	5.52575	8.93612	5.94074e-18	8.46878e-17	29.9324
RFC3	-0.631903	5.08727	-8.93551	5.9694e-18	8.50224e-17	29.9277
SLC25A35	0.66989	3.8426	8.93359	6.06039e-18	8.62436e-17	29.9128
GALNT18	-0.646872	3.94416	-8.93212	6.13126e-18	8.71766e-17	29.9013
EFEMP1	-1.3035	4.76378	-8.92844	6.31234e-18	8.96735e-17	29.8727
BMPR1B	-0.60663	2.23426	-8.92428	6.52324e-18	9.25894e-17	29.8404
WFDC13	0.492335	2.05682	8.9235	6.56363e-18	9.30822e-17	29.8343
ZNF709	0.229384	2.37022	8.92061	6.7149e-18	9.51452e-17	29.8119
TMEM50B	0.502813	5.59431	8.91549	6.9924e-18	9.89917e-17	29.772
AIM2	-1.53843	4.73371	-8.91461	7.04118e-18	9.95962e-17	29.7652
BANK1	0.63139	3.34034	8.91098	7.24559e-18	1.02399e-16	29.737
HOXB4	0.697214	4.16292	8.90829	7.40079e-18	1.04503e-16	29.7162
DNAJB4	-0.53158	4.41142	-8.90443	7.62995e-18	1.07646e-16	29.6862
FAM214A	0.633419	5.03658	8.90138	7.81535e-18	1.10167e-16	29.6626
ENTPD3	1.17527	4.92854	8.89885	7.97307e-18	1.12294e-16	29.6429
ASB12	0.315182	2.02031	8.89512	8.21098e-18	1.15545e-16	29.614
SMCO2	-0.455742	2.25425	-8.89436	8.26041e-18	1.16072e-16	29.6081
PBX4	0.604352	3.66188	8.89432	8.26254e-18	1.16072e-16	29.6078
SMC4	-0.676255	5.92859	-8.89315	8.33963e-18	1.17054e-16	29.5987
GALM	0.679644	5.76778	8.89291	8.35525e-18	1.17174e-16	29.5968
ARHGAP21	-0.567322	5.7037	-8.88869	8.63749e-18	1.21028e-16	29.5641
EVPL	0.926931	7.60677	8.8873	8.73233e-18	1.22253e-16	29.5534
CD300A	-0.720444	3.54516	-8.88217	9.09266e-18	1.27189e-16	29.5136
SAT2	0.443584	6.32027	8.87748	9.43452e-18	1.31858e-16	29.4773
IGFBP6	-1.19245	5.51864	-8.87661	9.49933e-18	1.32651e-16	29.4706
CD300C	-0.571717	2.47242	-8.87626	9.52539e-18	1.32902e-16	29.4679
NT5E	-1.21352	4.79363	-8.87065	9.95505e-18	1.38779e-16	29.4245
NISCH	0.49062	6.44554	8.86809	1.01578e-17	1.41484e-16	29.4046
ABCE1	-0.457138	6.45223	-8.86422	1.04715e-17	1.4573e-16	29.3747
FIG4	0.473908	6.10471	8.86182	1.06711e-17	1.48382e-16	29.3561
SLC5A7	0.574623	2.11574	8.86149	1.06991e-17	1.48646e-16	29.3536
IDH1	0.90949	7.96132	8.85766	1.10256e-17	1.53052e-16	29.324
PEBP1	0.59138	9.98987	8.85339	1.14014e-17	1.58136e-16	29.291
NRP2	-0.770306	3.9193	-8.8514	1.15818e-17	1.60501e-16	29.2756
GPR183	-0.856942	4.12277	-8.85115	1.16044e-17	1.6068e-16	29.2737
TMEM175	0.480093	5.09721	8.84812	1.18838e-17	1.6441e-16	29.2502
PHLDB3	0.685088	5.40702	8.84786	1.1908e-17	1.64605e-16	29.2483
GTF2H3	-0.471123	5.44619	-8.84675	1.20121e-17	1.65904e-16	29.2397
CCT3	-0.425115	8.74311	-8.84481	1.21965e-17	1.68208e-16	29.2247
ZNF513	0.459363	6.14973	8.84478	1.21994e-17	1.68208e-16	29.2245
TNK2	0.520583	5.76508	8.84434	1.22414e-17	1.68646e-16	29.2211
GDPD1	0.554014	3.62168	8.83506	1.31662e-17	1.81235e-16	29.1494
IGSF5	0.451393	2.06261	8.83173	1.35137e-17	1.85862e-16	29.1238
PPP1R14C	-1.29123	3.72098	-8.8302	1.36772e-17	1.87953e-16	29.112
ADAMTS2	-0.927556	4.24621	-8.83005	1.36929e-17	1.88011e-16	29.1109
MN1	-0.601438	2.44083	-8.82714	1.40087e-17	1.92103e-16	29.0884
CDK5RAP3	0.44938	7.47748	8.82709	1.40143e-17	1.92103e-16	29.088
SKAP1	0.857517	4.18189	8.8268	1.40467e-17	1.92385e-16	29.0858
COPZ2	-0.837319	4.67497	-8.82214	1.45687e-17	1.99369e-16	29.0499
TNFRSF12A	-0.87141	6.33139	-8.82072	1.47318e-17	2.01432e-16	29.0389
CLN3	0.488829	5.95012	8.82044	1.47647e-17	2.01715e-16	29.0367
PSMC3	-0.44395	8.61938	-8.81866	1.49718e-17	2.04374e-16	29.023
PELO	-0.461795	5.38031	-8.81558	1.53366e-17	2.0918e-16	28.9993
RPS6KA4	-0.51623	6.11915	-8.81249	1.57129e-17	2.14134e-16	28.9755
BTNL9	0.67127	2.52398	8.81198	1.57747e-17	2.14798e-16	28.9716
PIK3AP1	-0.814914	3.67211	-8.81143	1.58434e-17	2.15555e-16	28.9674
SLC43A3	-0.733638	4.33385	-8.81039	1.59724e-17	2.17129e-16	28.9594
SNRPD1	-0.457512	6.2876	-8.81021	1.59951e-17	2.17258e-16	28.958
DPP4	-0.930643	3.27834	-8.80944	1.60924e-17	2.18399e-16	28.952
NUP93	-0.396951	5.86171	-8.8087	1.6185e-17	2.19474e-16	28.9464
GPR153	-0.695287	3.94322	-8.80852	1.62086e-17	2.19612e-16	28.9449
UBE2E2	-0.965075	4.50789	-8.80596	1.65365e-17	2.23871e-16	28.9252
ZNF175	0.772322	4.09545	8.80562	1.65807e-17	2.24284e-16	28.9226
CCDC24	0.557851	5.25099	8.80526	1.66276e-17	2.24733e-16	28.9198
C4orf19	1.00037	4.22418	8.80476	1.6692e-17	2.25417e-16	28.916
UBE2T	-0.626817	6.80035	-8.80455	1.67192e-17	2.25599e-16	28.9144
CLDN23	0.841161	4.83597	8.80283	1.69462e-17	2.28474e-16	28.9012
ZNF266	0.491904	5.72829	8.79779	1.76277e-17	2.37468e-16	28.8624
FAM3C	-0.682616	5.70325	-8.79582	1.79013e-17	2.40955e-16	28.8472
SYNGR1	0.797643	4.20772	8.79565	1.79246e-17	2.41071e-16	28.846
OSBPL2	0.440527	6.05097	8.79419	1.81305e-17	2.4364e-16	28.8347
PRKDC	-0.59798	7.33243	-8.7924	1.83864e-17	2.46878e-16	28.8209
MRTO4	-0.395395	6.55848	-8.7819	1.9958e-17	2.6776e-16	28.7403
APH1B	0.487229	4.18617	8.78037	2.01964e-17	2.70737e-16	28.7286
ELL2	-0.680313	5.17693	-8.78009	2.02408e-17	2.71111e-16	28.7264
HDGF	-0.504159	8.70755	-8.77972	2.02994e-17	2.71674e-16	28.7236
NUP37	-0.459489	6.29622	-8.77655	2.08078e-17	2.78252e-16	28.6992
DUSP1	-0.978232	7.39677	-8.7762	2.08658e-17	2.78799e-16	28.6965
TMC6	0.563069	6.64803	8.77181	2.1592e-17	2.88269e-16	28.6629
ZNF681	0.594137	3.88668	8.77136	2.16685e-17	2.89055e-16	28.6594
SCEL	-1.28365	3.25837	-8.76703	2.24131e-17	2.98745e-16	28.6262
PITPNM2	-0.45632	3.23657	-8.76535	2.27081e-17	3.0243e-16	28.6133
DNMT1	-0.595454	7.12663	-8.76399	2.29501e-17	3.05406e-16	28.6029
TMBIM4	0.405496	6.69031	8.76288	2.31488e-17	3.078e-16	28.5944
TIMM9	-0.372249	6.21516	-8.7617	2.33643e-17	3.10414e-16	28.5853
SNTG1	0.734193	2.27331	8.75928	2.38091e-17	3.16068e-16	28.5667
FPR3	-1.00534	4.10807	-8.7553	2.45581e-17	3.25747e-16	28.5363
TAF5	-0.38658	4.07436	-8.75385	2.48374e-17	3.29186e-16	28.5251
B3GALNT2	-0.489429	4.29054	-8.75114	2.53679e-17	3.35736e-16	28.5044
MED6	-0.352902	5.43087	-8.75111	2.53725e-17	3.35736e-16	28.5042
NLRC5	-0.761353	4.26733	-8.74972	2.565e-17	3.39133e-16	28.4935
PRF1	-1.00445	3.70375	-8.74754	2.60891e-17	3.44661e-16	28.4768
LCP2	-0.781806	4.41923	-8.74737	2.61223e-17	3.44823e-16	28.4755
CEBPA	0.998039	6.41281	8.74674	2.62506e-17	3.46238e-16	28.4707
KRT81	-1.25581	2.73301	-8.74612	2.63781e-17	3.47641e-16	28.4659
ABCD3	0.690348	6.77268	8.74555	2.64948e-17	3.48898e-16	28.4616
GPR37	-0.695617	2.36384	-8.74401	2.68144e-17	3.52823e-16	28.4498
ZNF345	0.482197	3.57624	8.74205	2.72278e-17	3.57975e-16	28.4348
LRFN4	-0.864604	4.70948	-8.7391	2.78585e-17	3.65974e-16	28.4122
ATL2	-0.523539	5.76044	-8.73688	2.83445e-17	3.72061e-16	28.3952
VSIG4	-1.06794	4.25733	-8.73577	2.85893e-17	3.74975e-16	28.3868
ZNF43	0.698447	4.41233	8.73493	2.87778e-17	3.77145e-16	28.3803
TRAF3	-0.445753	4.94622	-8.7299	2.99265e-17	3.91887e-16	28.3418
SUSD3	-0.735854	3.31353	-8.72896	3.01461e-17	3.94448e-16	28.3346
SSR3	-0.393846	6.63541	-8.72866	3.02156e-17	3.95042e-16	28.3324
BCAT1	-1.06065	3.87898	-8.72771	3.04393e-17	3.97649e-16	28.3251
SCAP	0.606055	7.58956	8.72538	3.09957e-17	4.04596e-16	28.3073
CDCP1	-0.771415	5.8641	-8.72453	3.12e-17	4.06939e-16	28.3008
TMEM237	-0.509584	4.8402	-8.72289	3.16009e-17	4.11841e-16	28.2883
GFI1	-0.674252	2.69008	-8.71598	3.33433e-17	4.34203e-16	28.2355
HOXD11	-1.00166	3.02737	-8.71463	3.36942e-17	4.38426e-16	28.2252
GPSM2	-0.623751	5.19636	-8.71261	3.42268e-17	4.45002e-16	28.2098
PSMB2	-0.474905	7.47548	-8.71077	3.47196e-17	4.51053e-16	28.1957
MCM4	-0.677226	7.17772	-8.70844	3.53537e-17	4.58927e-16	28.1779
EGR2	-0.78861	3.68699	-8.70821	3.54163e-17	4.59376e-16	28.1762
CLMP	-0.929673	3.71877	-8.70656	3.58731e-17	4.64934e-16	28.1636
FXYD4	1.52011	3.74153	8.70332	3.67857e-17	4.76385e-16	28.1389
NCAPH	-0.621369	4.90032	-8.70297	3.6886e-17	4.77138e-16	28.1362
PDSS1	-0.453354	4.89119	-8.70291	3.6902e-17	4.77138e-16	28.1358
PAK1IP1	-0.452327	6.69171	-8.70255	3.70056e-17	4.781e-16	28.133
LRRC25	-0.672443	2.97261	-8.70169	3.72537e-17	4.80928e-16	28.1264
DAB1	0.894513	2.50442	8.70054	3.75865e-17	4.84842e-16	28.1177
ZNF814	0.539118	3.92128	8.69772	3.8418e-17	4.95179e-16	28.0962
PRDX6	-0.484987	8.73534	-8.69663	3.87434e-17	4.98981e-16	28.0879
IL24	-0.755982	2.79187	-8.69592	3.8957e-17	5.01338e-16	28.0825
RAB27A	-0.483066	4.4159	-8.69577	3.90031e-17	5.01538e-16	28.0813
PNMA1	-0.690275	4.95299	-8.69488	3.92718e-17	5.04598e-16	28.0746
MOCS1	0.716191	4.62604	8.69087	4.05145e-17	5.20158e-16	28.0439
CPAMD8	0.900342	3.18935	8.68992	4.0812e-17	5.23568e-16	28.0367
SEMA3F	0.776066	7.3442	8.68634	4.19602e-17	5.37877e-16	28.0095
TRAF4	0.533682	7.05238	8.6853	4.22997e-17	5.41806e-16	28.0015
UCHL1	-1.40458	4.49362	-8.68406	4.2706e-17	5.46583e-16	27.9921
CELSR1	-0.846242	4.35295	-8.68164	4.35167e-17	5.56525e-16	27.9736
TCAIM	0.425185	4.52024	8.67975	4.41579e-17	5.64286e-16	27.9593
ZNF223	0.517606	4.73073	8.678	4.47592e-17	5.71524e-16	27.946
WDR3	-0.431024	5.29643	-8.67722	4.50285e-17	5.74516e-16	27.9401
HDHD3	0.465562	5.53445	8.67476	4.58947e-17	5.85113e-16	27.9213
SET	-0.516792	8.81611	-8.6735	4.63451e-17	5.90396e-16	27.9117
ASCC2	0.523707	7.88718	8.67046	4.74461e-17	6.03953e-16	27.8886
THBS1	-0.936721	7.0967	-8.66616	4.90516e-17	6.23906e-16	27.8559
GARNL3	0.493818	3.29576	8.66217	5.0588e-17	6.42949e-16	27.8256
TIMM8A	-0.390092	4.55367	-8.66041	5.12819e-17	6.51264e-16	27.8122
USP1	-0.66379	6.09172	-8.65846	5.2058e-17	6.60609e-16	27.7974
LRRFIP2	-0.38398	4.99908	-8.65751	5.2444e-17	6.64993e-16	27.7902
NAA15	-0.41854	5.46936	-8.65544	5.32891e-17	6.75187e-16	27.7744
HPS5	-0.439595	4.50438	-8.65526	5.33626e-17	6.75597e-16	27.7731
IL32	-1.11144	5.2926	-8.65427	5.37713e-17	6.80246e-16	27.7656
LGALS1	-0.976639	9.25085	-8.65241	5.45497e-17	6.89562e-16	27.7515
SH2D4A	0.737814	5.8694	8.65017	5.55032e-17	7.01075e-16	27.7344
ZNF90	0.753137	3.81757	8.6453	5.76282e-17	7.27356e-16	27.6975
CAD	-0.472467	6.11481	-8.64445	5.80101e-17	7.31122e-16	27.691
HAVCR2	-0.86571	4.06236	-8.64443	5.80157e-17	7.31122e-16	27.6909
PM20D1	1.96343	4.1281	8.64278	5.876e-17	7.39934e-16	27.6784
GATA2	1.15516	5.45746	8.63969	6.01779e-17	7.57208e-16	27.6549
C3orf62	0.398023	4.36144	8.63684	6.15171e-17	7.73466e-16	27.6333
OGFOD1	-0.336763	5.8696	-8.63606	6.18864e-17	7.77513e-16	27.6274
TOP2A	-0.855697	7.53652	-8.63498	6.24031e-17	7.83405e-16	27.6192
CYCS	-0.42058	7.05985	-8.63366	6.30453e-17	7.90862e-16	27.6091
SMDT1	0.434706	6.06332	8.63331	6.32141e-17	7.92373e-16	27.6065
SRPRB	-0.388577	7.20589	-8.63206	6.38252e-17	7.99423e-16	27.5971
MTUS2	0.834574	2.95621	8.63087	6.44139e-17	8.06181e-16	27.588
WFS1	0.609863	6.94446	8.62865	6.55247e-17	8.19459e-16	27.5712
GCNT4	0.914042	4.35824	8.62718	6.62738e-17	8.28195e-16	27.56
HSD17B2	1.39158	4.99826	8.62696	6.63863e-17	8.2897e-16	27.5584
CENPL	-0.508855	3.91691	-8.62331	6.8276e-17	8.51918e-16	27.5308
NARF	0.448868	6.34345	8.62309	6.83947e-17	8.52751e-16	27.5291
HSP90B1	-0.47176	10.3968	-8.62202	6.89585e-17	8.59061e-16	27.521
ZNF436	0.621006	5.9739	8.62193	6.90055e-17	8.59061e-16	27.5203
CCL3L1	-0.654104	2.62808	-8.62147	6.92511e-17	8.61464e-16	27.5168
EIF3J	-0.422656	6.5347	-8.61774	7.12692e-17	8.85897e-16	27.4886
EGR1	-0.976581	7.27285	-8.61479	7.29066e-17	9.05565e-16	27.4663
EXOSC2	-0.427254	5.2868	-8.61403	7.3335e-17	9.10197e-16	27.4605
TMEM65	-0.543115	4.27841	-8.61235	7.42886e-17	9.21335e-16	27.4478
PAN2	0.603387	5.76648	8.61124	7.49279e-17	9.27931e-16	27.4394
DPM3	0.534501	7.28438	8.61123	7.49335e-17	9.27931e-16	27.4393
CASP9	0.379738	4.44135	8.61103	7.50497e-17	9.28669e-16	27.4378
MERTK	0.690371	5.21479	8.60841	7.65802e-17	9.46893e-16	27.4179
EFNB2	-0.844708	5.85536	-8.60719	7.73005e-17	9.55081e-16	27.4087
ADAMTS6	-0.457279	2.48568	-8.60584	7.81059e-17	9.64305e-16	27.3985
TRIM62	0.471388	4.36421	8.60438	7.89879e-17	9.74461e-16	27.3875
UTP6	-0.365279	6.45211	-8.60163	8.06745e-17	9.94521e-16	27.3667
UGT2B7	1.30294	3.57538	8.5999	8.17541e-17	1.00707e-15	27.3537
TLR2	-0.759896	4.04784	-8.5984	8.27079e-17	1.01806e-15	27.3423
PI15	-0.591184	2.53736	-8.5949	8.49603e-17	1.045e-15	27.3158
ZMAT1	0.628186	2.76118	8.59436	8.53108e-17	1.04852e-15	27.3118
PSMA1	-0.386471	7.12197	-8.59407	8.55014e-17	1.05008e-15	27.3096
RNF19B	-0.59395	5.6444	-8.59384	8.56578e-17	1.05121e-15	27.3078
PEX11A	0.589313	4.34882	8.59229	8.66807e-17	1.06297e-15	27.2961
EIF5A2	-0.67121	3.01022	-8.59183	8.69911e-17	1.06598e-15	27.2926
WWTR1	-0.539903	4.49055	-8.59098	8.75562e-17	1.07211e-15	27.2863
DEK	-0.742155	7.9016	-8.5899	8.82895e-17	1.08028e-15	27.2781
NKRF	-0.341176	5.2118	-8.58973	8.83999e-17	1.08082e-15	27.2768
ZNF248	0.423572	3.95541	8.58845	8.92761e-17	1.09072e-15	27.2671
IRF2BP2	-0.477833	6.57263	-8.58697	9.02946e-17	1.10235e-15	27.256
C1QC	-1.24017	7.07047	-8.58539	9.14024e-17	1.11504e-15	27.244
SYNE4	0.925138	4.39712	8.58235	9.35612e-17	1.14053e-15	27.221
PSMC2	-0.363553	7.72522	-8.58188	9.38965e-17	1.14377e-15	27.2175
NSUN7	0.710395	3.55523	8.58167	9.40441e-17	1.14472e-15	27.216
LIMK1	-0.47377	5.92979	-8.57995	9.52993e-17	1.15913e-15	27.2029
TFAP2A	-0.943799	5.37676	-8.57782	9.6869e-17	1.17735e-15	27.1869
PODNL1	-0.666112	2.93295	-8.5748	9.91422e-17	1.20409e-15	27.1641
MAOA	1.1954	7.55994	8.57203	1.01264e-16	1.22896e-15	27.1433
UBE2F	-0.413275	5.47337	-8.56897	1.03671e-16	1.25723e-15	27.1202
C3AR1	-0.896169	3.90374	-8.56187	1.09474e-16	1.32662e-15	27.0666
FEN1	-0.652281	6.19763	-8.56062	1.10521e-16	1.33833e-15	27.0573
PNPLA2	0.57356	7.01347	8.55739	1.13292e-16	1.37087e-15	27.0329
CNIH1	-0.494397	6.13759	-8.55636	1.14188e-16	1.38069e-15	27.0252
MAP7D1	-0.497502	6.7053	-8.55597	1.14533e-16	1.38384e-15	27.0222
IL9R	0.730007	2.74744	8.55485	1.15515e-16	1.39468e-15	27.0138
GEMIN5	-0.397385	4.96561	-8.5535	1.1672e-16	1.40819e-15	27.0036
S100A5	0.787678	3.10814	8.55148	1.18536e-16	1.42905e-15	26.9885
FARP1	0.632882	5.27317	8.54826	1.21502e-16	1.46373e-15	26.9642
SEC23A	-0.475504	5.64082	-8.54672	1.2294e-16	1.47997e-15	26.9526
ZC3HAV1L	-0.520403	3.74993	-8.54024	1.29188e-16	1.55404e-15	26.9039
EXOSC3	-0.494831	5.72468	-8.53974	1.29682e-16	1.55884e-15	26.9001
SSRP1	-0.458049	8.11754	-8.53818	1.31237e-16	1.57638e-15	26.8884
CES4A	0.594712	3.42943	8.53797	1.31447e-16	1.57775e-15	26.8868
AR	0.950121	3.1398	8.53658	1.32854e-16	1.59347e-15	26.8764
NUP155	-0.568039	5.99043	-8.53551	1.33943e-16	1.60536e-15	26.8683
CNTNAP3	-0.427612	2.06242	-8.53498	1.34486e-16	1.61069e-15	26.8644
ZNF446	0.371788	4.11941	8.53197	1.37616e-16	1.64678e-15	26.8418
ASAP1	-0.602154	6.06347	-8.53189	1.377e-16	1.64678e-15	26.8412
RSRP1	0.541674	6.34607	8.53177	1.37833e-16	1.64717e-15	26.8402
KPNA3	-0.559441	5.89994	-8.5307	1.38964e-16	1.65948e-15	26.8322
CDT1	-0.721832	5.50363	-8.52941	1.4034e-16	1.67469e-15	26.8225
MAPK8IP3	0.598344	5.73992	8.52929	1.40472e-16	1.67504e-15	26.8216
MCL1	-0.489847	7.58134	-8.52735	1.42564e-16	1.69876e-15	26.807
ISYNA1	0.879458	6.5641	8.52659	1.43398e-16	1.70745e-15	26.8013
F12	-0.808198	3.84685	-8.52479	1.45385e-16	1.72985e-15	26.7878
ZNF610	0.673365	3.55355	8.52461	1.45586e-16	1.73099e-15	26.7864
NNMT	-1.26198	5.75852	-8.52007	1.50711e-16	1.79064e-15	26.7524
RAD51	-0.545122	4.79304	-8.51685	1.54472e-16	1.83399e-15	26.7282
SIRT7	0.379527	5.74705	8.51675	1.54589e-16	1.83406e-15	26.7274
SULT2A1	1.44784	3.13743	8.51541	1.56176e-16	1.85154e-15	26.7174
BZW1	-0.503426	6.58432	-8.51372	1.58196e-16	1.87414e-15	26.7048
VILL	0.998649	4.32752	8.51088	1.61671e-16	1.91392e-15	26.6834
PHLDB2	-0.737604	5.01658	-8.50861	1.64494e-16	1.94594e-15	26.6664
STIL	-0.604596	5.11524	-8.50665	1.66964e-16	1.97374e-15	26.6518
RAD54L	-0.70102	5.19771	-8.5034	1.71163e-16	2.02192e-15	26.6273
SRPX	-1.03768	4.19756	-8.50199	1.73004e-16	2.04219e-15	26.6168
SLC35B4	-0.345356	4.04566	-8.49894	1.77081e-16	2.08882e-15	26.5939
SLC25A38	0.407323	6.73644	8.49509	1.82352e-16	2.14945e-15	26.5651
SLC6A9	-0.65992	3.92367	-8.49452	1.83137e-16	2.15715e-15	26.5609
CTSB	-0.752191	8.60782	-8.49303	1.85227e-16	2.1802e-15	26.5497
MTFR2	-0.537975	4.37699	-8.49159	1.87277e-16	2.20275e-15	26.5389
DUSP5	-0.848876	6.34173	-8.48945	1.90352e-16	2.23732e-15	26.5229
MYL5	0.549075	4.33881	8.48107	2.02883e-16	2.3829e-15	26.4602
PLCH1	0.67835	2.72745	8.47982	2.0483e-16	2.40404e-15	26.4509
FAM149A	0.743523	3.04634	8.4783	2.07215e-16	2.43029e-15	26.4395
TNIP3	-0.508393	2.21998	-8.47714	2.09044e-16	2.45e-15	26.4308
C1QB	-1.27689	7.08212	-8.47545	2.11746e-16	2.47989e-15	26.4182
CASP14	-1.71881	4.05625	-8.47314	2.15498e-16	2.52204e-15	26.401
RECQL5	0.404287	5.05828	8.47217	2.17099e-16	2.53735e-15	26.3937
TTC7A	-0.538218	4.93553	-8.47216	2.17116e-16	2.53735e-15	26.3936
TMEM139	1.10859	3.74416	8.47015	2.20469e-16	2.5747e-15	26.3786
XPOT	-0.535159	6.80158	-8.46915	2.22146e-16	2.59243e-15	26.3711
PRELID1	-0.361746	7.24717	-8.46747	2.24998e-16	2.62386e-15	26.3586
AHNAK	-0.693643	7.99547	-8.46675	2.2624e-16	2.63647e-15	26.3532
UBAC1	-0.442658	6.65018	-8.46523	2.28869e-16	2.66521e-15	26.3418
IPO11	-0.387525	5.23445	-8.46502	2.29224e-16	2.66745e-15	26.3403
LATS2	-0.501114	4.23413	-8.46326	2.32312e-16	2.70147e-15	26.3271
PAM	-0.702179	5.7255	-8.46209	2.34391e-16	2.72372e-15	26.3184
COQ3	-0.414247	5.41324	-8.46176	2.34966e-16	2.72847e-15	26.316
CNKSR1	0.556123	5.89798	8.46102	2.36293e-16	2.74194e-15	26.3104
MRPL13	-0.457743	6.47885	-8.46051	2.37214e-16	2.75068e-15	26.3066
KLK13	-0.918293	2.2108	-8.46031	2.37586e-16	2.75305e-15	26.3051
SLAMF8	-0.887317	3.56856	-8.45857	2.40745e-16	2.78768e-15	26.2921
CHEK1	-0.578101	4.48611	-8.4551	2.47158e-16	2.85992e-15	26.2663
ITPR3	-0.634203	6.85777	-8.4519	2.53236e-16	2.92818e-15	26.2424
SLC25A32	-0.405671	4.80616	-8.44895	2.58974e-16	2.99242e-15	26.2204
MMGT1	-0.504104	5.65273	-8.4439	2.69084e-16	3.10706e-15	26.1827
CTPS1	-0.607254	5.9452	-8.43671	2.84165e-16	3.27889e-15	26.1292
PPP1R14D	1.06558	2.91368	8.43607	2.85549e-16	3.29254e-15	26.1244
JAZF1	-0.562774	3.56411	-8.43089	2.96971e-16	3.42156e-15	26.0858
METAP2	-0.394774	7.36471	-8.43081	2.97156e-16	3.42156e-15	26.0852
FUT9	0.615403	2.43143	8.4286	3.0217e-16	3.47686e-15	26.0688
SMOX	-0.630424	4.30793	-8.42713	3.05566e-16	3.51347e-15	26.0578
TMPRSS11F	-0.491719	1.8408	-8.42667	3.06631e-16	3.52326e-15	26.0544
FAM189A2	0.549557	2.6673	8.42404	3.12784e-16	3.59143e-15	26.0349
ASTN2	0.730088	3.17314	8.42235	3.16828e-16	3.63533e-15	26.0222
LARP1	-0.365814	7.60026	-8.4218	3.1813e-16	3.64771e-15	26.0182
HS3ST5	0.598944	2.19277	8.42113	3.19757e-16	3.6638e-15	26.0132
NDC1	-0.468504	5.36502	-8.41933	3.24145e-16	3.71149e-15	25.9998
EFCC1	0.436887	2.59327	8.41896	3.25066e-16	3.71944e-15	25.997
CLEC4A	-0.617595	3.39898	-8.41615	3.32032e-16	3.7965e-15	25.9762
G2E3	-0.386366	4.36247	-8.41512	3.34642e-16	3.82368e-15	25.9685
BAIAP3	0.840286	3.65194	8.41429	3.3674e-16	3.84498e-15	25.9623
PTPRZ1	-1.0427	2.42708	-8.41405	3.37346e-16	3.84921e-15	25.9606
GTF3C4	-0.435914	4.85539	-8.41305	3.39911e-16	3.87579e-15	25.9531
QSOX2	-0.521843	4.81961	-8.40687	3.56185e-16	4.05853e-15	25.9072
PPIL1	-0.492105	6.26547	-8.40541	3.60132e-16	4.10066e-15	25.8964
CPOX	-0.411999	5.7301	-8.40399	3.64023e-16	4.14208e-15	25.8858
IFT27	0.476512	4.78954	8.40368	3.64884e-16	4.14901e-15	25.8835
HEMK1	0.428457	3.93276	8.40281	3.67272e-16	4.17326e-15	25.8771
TOMM5	-0.512664	5.96636	-8.39984	3.75611e-16	4.26507e-15	25.855
FAM91A1	-0.448527	5.60988	-8.39749	3.82337e-16	4.33844e-15	25.8376
CTSL	-0.874504	7.72945	-8.39376	3.93253e-16	4.45922e-15	25.8099
ZNF423	0.553292	2.83549	8.39127	4.00717e-16	4.54072e-15	25.7914
XXYLT1	-0.426221	4.59434	-8.38726	4.13031e-16	4.67567e-15	25.7617
BAG2	-0.552865	3.38413	-8.38721	4.13196e-16	4.67567e-15	25.7613
C9orf116	0.593479	4.0089	8.38518	4.19577e-16	4.7446e-15	25.7463
ANKDD1A	0.622888	4.26021	8.38358	4.24683e-16	4.79904e-15	25.7344
SURF4	-0.473233	7.74017	-8.38149	4.31406e-16	4.87165e-15	25.7189
SULT2B1	-1.07401	3.54333	-8.37979	4.36985e-16	4.93126e-15	25.7063
NRIP2	0.272607	2.70213	8.37922	4.3888e-16	4.94923e-15	25.7021
NRG1	-0.706926	2.3201	-8.37681	4.46919e-16	5.03644e-15	25.6842
MRPL11	-0.450464	6.2169	-8.37584	4.50213e-16	5.07007e-15	25.677
ATL3	-0.544961	5.73357	-8.3716	4.64834e-16	5.23113e-15	25.6456
ASCC3	-0.483585	5.66115	-8.3704	4.69038e-16	5.27483e-15	25.6368
NUF2	-0.738108	5.31566	-8.37026	4.69543e-16	5.27689e-15	25.6357
ADAMTS12	-0.764847	3.5343	-8.36552	4.86597e-16	5.46481e-15	25.6007
SAMD11	0.666019	2.84285	8.36531	4.87361e-16	5.46964e-15	25.5991
DCAKD	0.428407	6.2767	8.35871	5.12186e-16	5.74432e-15	25.5503
APLN	-0.770791	3.50332	-8.3559	5.23138e-16	5.86314e-15	25.5295
AXL	-0.864668	5.18054	-8.35539	5.25179e-16	5.882e-15	25.5257
KLF6	-0.586792	7.62437	-8.35476	5.27646e-16	5.9056e-15	25.5211
EXT2	-0.434913	6.63864	-8.35305	5.34499e-16	5.97823e-15	25.5084
LRRC59	-0.480682	6.74363	-8.35205	5.38525e-16	6.01915e-15	25.501
DDX24	-0.389755	6.83306	-8.35192	5.39036e-16	6.02077e-15	25.5001
KRT20	2.31036	5.71736	8.35102	5.42731e-16	6.05791e-15	25.4934
GOLT1B	-0.477383	5.97667	-8.35052	5.44762e-16	6.07644e-15	25.4897
FHIT	0.434438	2.70191	8.35039	5.45288e-16	6.07818e-15	25.4888
CSF1	-0.659256	3.93062	-8.34852	5.53034e-16	6.16034e-15	25.4749
BMS1	-0.344831	6.37452	-8.34695	5.59587e-16	6.22911e-15	25.4634
CCL24	-0.761545	2.57958	-8.34517	5.67116e-16	6.30864e-15	25.4502
PVALB	1.55882	3.38535	8.34501	5.67791e-16	6.31186e-15	25.4491
TRPM4	0.598036	6.58553	8.34228	5.79562e-16	6.43835e-15	25.4289
ICA1L	0.342786	2.5917	8.34153	5.82865e-16	6.47067e-15	25.4233
ITGAX	-0.700244	3.94766	-8.34111	5.84682e-16	6.48645e-15	25.4203
CTLA4	-0.693678	3.03945	-8.33993	5.89893e-16	6.53984e-15	25.4115
PAQR4	-0.670862	4.62323	-8.33652	6.05224e-16	6.70528e-15	25.3863
CTF1	0.606991	4.04364	8.33532	6.10686e-16	6.76123e-15	25.3775
CCL18	-1.26247	4.49441	-8.33197	6.26268e-16	6.92907e-15	25.3528
GRAMD1C	0.612436	3.98547	8.33146	6.28671e-16	6.95096e-15	25.349
ZSCAN9	0.475857	5.10505	8.33111	6.30335e-16	6.96467e-15	25.3464
EMC1	-0.388104	5.82277	-8.33091	6.31248e-16	6.97006e-15	25.345
SIGMAR1	-0.451617	6.30441	-8.32727	6.48752e-16	7.15852e-15	25.3181
MGST2	0.612136	7.67099	8.32192	6.75306e-16	7.44652e-15	25.2787
FAS	-0.691559	4.18153	-8.32171	6.76409e-16	7.45367e-15	25.2771
SEC61G	-0.550512	8.46969	-8.32005	6.84872e-16	7.54187e-15	25.2649
B4GALT2	-0.427738	6.07921	-8.31936	6.88393e-16	7.57556e-15	25.2599
TMPRSS11D	-0.906671	2.13106	-8.31907	6.8994e-16	7.58749e-15	25.2577
AK9	0.410298	3.07415	8.31815	6.94705e-16	7.63477e-15	25.2509
KIFC2	0.722176	5.92289	8.30856	7.46449e-16	8.19795e-15	25.1803
SEMA3A	-0.634584	2.90605	-8.30838	7.47494e-16	8.20393e-15	25.1789
ZNF692	0.523478	5.96425	8.30514	7.65855e-16	8.39983e-15	25.1551
CCNL2	0.452693	6.08456	8.30279	7.79455e-16	8.54328e-15	25.1378
ZNF19	0.273518	2.64064	8.29723	8.12578e-16	8.90039e-15	25.0969
ZSCAN2	0.413352	3.65382	8.29078	8.52766e-16	9.33435e-15	25.0495
KRT7	1.6081	9.8351	8.29036	8.55453e-16	9.35568e-15	25.0464
DNAJB11	-0.39576	7.45804	-8.2903	8.55856e-16	9.35568e-15	25.046
GAST	-0.45779	1.82028	-8.28973	8.59478e-16	9.38903e-15	25.0418
MCMBP	-0.386584	5.88618	-8.28938	8.61767e-16	9.40777e-15	25.0392
AEN	-0.416819	4.87102	-8.28887	8.65003e-16	9.43682e-15	25.0355
DUSP28	0.25405	3.11146	8.28837	8.68273e-16	9.46619e-15	25.0318
MRGBP	-0.389941	6.25671	-8.28611	8.83052e-16	9.62092e-15	25.0153
MOB3B	-0.712605	3.57034	-8.28497	8.90639e-16	9.69715e-15	25.0068
RC3H2	-0.448871	5.78801	-8.28426	8.9538e-16	9.74231e-15	25.0016
SIGLEC7	-0.456489	2.38671	-8.28377	8.98691e-16	9.77185e-15	24.998
RNASET2	0.622227	7.08231	8.28362	8.99654e-16	9.77584e-15	24.997
KRTDAP	-1.95417	3.92111	-8.28199	9.1071e-16	9.88943e-15	24.985
C20orf96	0.575484	4.92363	8.28154	9.13753e-16	9.91592e-15	24.9817
TRIM8	0.449866	7.38519	8.28135	9.15102e-16	9.92398e-15	24.9802
ITM2C	0.907479	7.6782	8.27993	9.24838e-16	1.00229e-14	24.9698
CD70	-0.66624	2.44843	-8.27451	9.63071e-16	1.04263e-14	24.9301
ZNF546	0.26896	2.35894	8.27447	9.63329e-16	1.04263e-14	24.9298
AQP7	0.701349	2.43306	8.27369	9.6895e-16	1.04803e-14	24.9241
SPON2	-0.772778	4.37784	-8.27282	9.75309e-16	1.05421e-14	24.9177
DLEC1	0.280531	2.0739	8.27158	9.84337e-16	1.06327e-14	24.9086
GEMIN8	0.34449	4.6362	8.2693	1.00125e-15	1.08082e-14	24.8919
RBM18	-0.391322	4.82281	-8.26849	1.00737e-15	1.08672e-14	24.8859
PSMD5	-0.441171	5.33427	-8.26627	1.02418e-15	1.10412e-14	24.8696
GSTM2	1.41602	5.22303	8.26546	1.03037e-15	1.11007e-14	24.8637
TMEM205	0.499982	7.48637	8.26365	1.04438e-15	1.12442e-14	24.8505
SUPT16H	-0.432925	7.47702	-8.26085	1.06648e-15	1.14712e-14	24.8299
B3GNT3	1.05764	6.16398	8.2608	1.06686e-15	1.14712e-14	24.8295
CLIP4	-0.67136	4.19975	-8.25964	1.07613e-15	1.15633e-14	24.821
TDO2	-0.715241	3.48957	-8.25871	1.08363e-15	1.16363e-14	24.8142
PSPH	-0.554088	4.70678	-8.25853	1.08503e-15	1.16436e-14	24.813
KLHDC9	0.755563	3.96119	8.25837	1.08635e-15	1.16502e-14	24.8118
JOSD1	-0.404383	6.09744	-8.25743	1.09403e-15	1.17249e-14	24.8048
KCNH4	0.508279	2.26813	8.25429	1.11995e-15	1.19948e-14	24.7818
UBQLNL	0.351558	2.35256	8.2502	1.15462e-15	1.23581e-14	24.7519
ASAH1	0.585184	7.13662	8.2489	1.16583e-15	1.247e-14	24.7424
PTCHD1	1.07112	3.21304	8.24704	1.18208e-15	1.26356e-14	24.7288
GALNT6	-0.799664	4.06723	-8.24595	1.19174e-15	1.27306e-14	24.7208
PHLDA2	-0.725648	5.87962	-8.2454	1.19668e-15	1.27749e-14	24.7168
OFD1	0.455148	6.07736	8.24226	1.22496e-15	1.30684e-14	24.6938
PTMS	-0.692888	8.87742	-8.2389	1.25599e-15	1.33907e-14	24.6693
ZNF14	0.418674	5.93774	8.23328	1.30966e-15	1.39538e-14	24.6282
MYL12A	-0.477878	9.00335	-8.23303	1.31208e-15	1.39706e-14	24.6264
MMP3	-1.31389	3.96496	-8.23026	1.3394e-15	1.42522e-14	24.6061
PDLIM5	-0.441491	5.0558	-8.22824	1.35969e-15	1.44587e-14	24.5913
RAD23B	-0.469442	7.58663	-8.22659	1.3765e-15	1.4628e-14	24.5793
BATF3	-0.464349	2.56797	-8.2263	1.37947e-15	1.465e-14	24.5772
PIK3CD	-0.655148	4.06434	-8.22344	1.40913e-15	1.49554e-14	24.5563
MPP1	-0.708306	4.02749	-8.22239	1.42017e-15	1.50628e-14	24.5486
TAF13	-0.493232	6.47736	-8.22214	1.42282e-15	1.50812e-14	24.5468
CALM2	-0.449318	8.82979	-8.22001	1.44547e-15	1.53114e-14	24.5313
PTPN1	-0.420033	6.97572	-8.21588	1.49056e-15	1.57788e-14	24.5011
WDR6	0.500612	7.79976	8.21517	1.4985e-15	1.58526e-14	24.4959
RALB	-0.471286	6.57329	-8.21281	1.52501e-15	1.61226e-14	24.4787
BMP2K	-0.415621	3.58627	-8.21036	1.553e-15	1.64028e-14	24.4608
FMO1	-0.548231	2.36295	-8.21031	1.55351e-15	1.64028e-14	24.4605
TOP2B	0.639058	8.25263	8.20821	1.57793e-15	1.665e-14	24.4452
CAPN8	1.3077	3.98137	8.20657	1.59724e-15	1.68429e-14	24.4332
PDIA6	-0.599067	7.74525	-8.20572	1.60744e-15	1.69396e-14	24.427
TMEM38B	-0.558536	3.72403	-8.20162	1.65706e-15	1.74513e-14	24.3971
IL13RA1	-0.533127	6.90019	-8.19988	1.67863e-15	1.7667e-14	24.3844
TBC1D17	0.370485	5.98686	8.19937	1.68492e-15	1.77219e-14	24.3808
DDX18	-0.395836	6.62286	-8.19672	1.71834e-15	1.80619e-14	24.3615
SPTSSA	-0.581939	6.15429	-8.19571	1.73131e-15	1.81865e-14	24.3541
ACTBL2	-0.303743	1.73073	-8.19475	1.74366e-15	1.83045e-14	24.3471
SPHK2	0.504564	4.82075	8.19319	1.76401e-15	1.8503e-14	24.3357
CCL26	-0.472377	2.2755	-8.19313	1.76482e-15	1.8503e-14	24.3353
F2R	-0.709833	5.05761	-8.19299	1.76655e-15	1.85093e-14	24.3343
USP14	-0.47568	6.58635	-8.19192	1.78068e-15	1.86454e-14	24.3265
CDC25A	-0.584996	4.3024	-8.19145	1.7869e-15	1.86987e-14	24.3231
STAP2	0.581111	7.05106	8.18844	1.82715e-15	1.91077e-14	24.3012
CYBB	-0.95522	4.99013	-8.18826	1.8296e-15	1.91211e-14	24.2999
FADD	-0.521345	5.4013	-8.18597	1.861e-15	1.94368e-14	24.2832
WDR62	-0.615049	4.31682	-8.18469	1.87866e-15	1.96088e-14	24.2739
FAM221B	0.118897	1.66415	8.18257	1.9084e-15	1.99066e-14	24.2585
RILP	0.448459	3.97691	8.18171	1.92067e-15	2.00219e-14	24.2522
PLAA	-0.424832	5.51205	-8.1809	1.93213e-15	2.01285e-14	24.2463
IL31RA	-0.372236	1.89412	-8.18048	1.93817e-15	2.01786e-14	24.2433
PRMT3	-0.413355	4.73695	-8.18018	1.94245e-15	2.02103e-14	24.2411
GNA12	-0.557294	4.98136	-8.17995	1.9458e-15	2.02324e-14	24.2394
TEX2	-0.43314	5.35405	-8.17384	2.0358e-15	2.11548e-14	24.195
PGLYRP4	-0.824793	2.64026	-8.1733	2.04395e-15	2.1226e-14	24.1911
NUP153	-0.556678	6.43026	-8.17257	2.05501e-15	2.13274e-14	24.1858
CCNYL1	-0.523074	4.41244	-8.17072	2.08333e-15	2.16076e-14	24.1724
ARL4D	-0.855118	5.41651	-8.17048	2.08712e-15	2.16332e-14	24.1706
HOXB8	1.22978	3.98184	8.16676	2.14539e-15	2.22232e-14	24.1435
DOK2	-0.746937	3.43378	-8.16651	2.1493e-15	2.22496e-14	24.1417
CHUK	-0.385011	5.09032	-8.16521	2.17003e-15	2.24501e-14	24.1323
SCIN	1.05851	4.0351	8.16425	2.1856e-15	2.25969e-14	24.1253
ABAT	0.840927	4.39477	8.16228	2.21765e-15	2.29139e-14	24.111
C10orf99	1.86111	6.22236	8.16053	2.24655e-15	2.31979e-14	24.0983
C1R	-0.86921	6.50416	-8.15975	2.25947e-15	2.33165e-14	24.0927
ANKMY1	0.369583	4.0941	8.15859	2.27892e-15	2.35025e-14	24.0842
RTTN	-0.436033	3.73419	-8.15836	2.28285e-15	2.35282e-14	24.0826
STOML2	-0.430975	8.49416	-8.15704	2.30521e-15	2.37438e-14	24.073
TPBG	-0.646373	4.77627	-8.1553	2.33502e-15	2.40358e-14	24.0604
EPS8L3	0.939229	2.72866	8.15125	2.40598e-15	2.47507e-14	24.031
CXCL3	-0.688188	2.74098	-8.15104	2.40964e-15	2.47728e-14	24.0295
HEG1	-0.693492	5.00944	-8.15074	2.41494e-15	2.48117e-14	24.0273
IER5	-0.637971	6.03138	-8.14946	2.4379e-15	2.5032e-14	24.018
KCTD5	-0.387044	6.51437	-8.14808	2.46296e-15	2.52734e-14	24.008
ZNF704	0.7061	4.38628	8.14502	2.51909e-15	2.58333e-14	23.9859
PFKFB3	-0.728988	5.59402	-8.14234	2.56957e-15	2.63345e-14	23.9664
SLC25A29	0.553536	4.43435	8.14058	2.60319e-15	2.66624e-14	23.9536
ORAI1	-0.484285	6.01641	-8.13961	2.62176e-15	2.68358e-14	23.9467
AADAT	0.688532	4.88023	8.13292	2.75449e-15	2.81768e-14	23.8982
MBNL1	-0.346517	4.97523	-8.13197	2.77375e-15	2.83562e-14	23.8913
RAP2B	-0.476597	5.15144	-8.13115	2.7906e-15	2.85107e-14	23.8854
IGSF22	0.296139	2.26354	8.13049	2.80413e-15	2.86311e-14	23.8806
RAB11FIP3	0.39614	5.34217	8.12963	2.82196e-15	2.87952e-14	23.8744
FAM13B	0.484374	5.41889	8.1287	2.84146e-15	2.89762e-14	23.8677
UCN2	-0.822403	3.24001	-8.12741	2.86868e-15	2.92356e-14	23.8583
OLFML2A	-0.715931	4.41061	-8.12724	2.87212e-15	2.92525e-14	23.8571
ACVR2A	0.514018	4.47614	8.12563	2.90638e-15	2.95831e-14	23.8455
PPRC1	-0.34917	6.15759	-8.11977	3.03463e-15	3.08693e-14	23.8031
TAGLN2	-0.635562	9.721	-8.1184	3.06551e-15	3.11642e-14	23.7932
TMEM88	0.44614	3.61773	8.11502	3.14277e-15	3.19297e-14	23.7687
SPTLC1	-0.502575	5.95567	-8.11417	3.16245e-15	3.21098e-14	23.7626
TPD52L2	-0.357196	7.51389	-8.11398	3.16672e-15	3.21333e-14	23.7613
ENPP5	0.745345	3.51696	8.11214	3.21009e-15	3.25533e-14	23.7479
KAT2B	0.601001	5.32601	8.11021	3.25584e-15	3.29968e-14	23.734
C1QA	-1.19483	7.59001	-8.11004	3.26006e-15	3.30192e-14	23.7328
GPR3	-0.392962	2.59198	-8.10914	3.28169e-15	3.32178e-14	23.7263
TXNDC9	-0.46648	6.11828	-8.10756	3.31993e-15	3.35841e-14	23.7149
ABHD14B	0.476878	5.99482	8.10695	3.33484e-15	3.37142e-14	23.7105
RAP2A	-0.49556	5.17759	-8.10575	3.36445e-15	3.39925e-14	23.7018
KCNC3	0.634113	3.52631	8.10455	3.39425e-15	3.42725e-14	23.6932
PACSIN1	0.711022	2.83196	8.10285	3.43706e-15	3.46834e-14	23.6809
HSH2D	0.687507	4.22302	8.09981	3.51466e-15	3.54447e-14	23.6589
WDR36	-0.401106	5.7252	-8.09763	3.57137e-15	3.59945e-14	23.6432
HAS2	-0.998164	3.71227	-8.09518	3.63631e-15	3.66265e-14	23.6255
CBR1	-0.56618	6.32593	-8.09302	3.69455e-15	3.71903e-14	23.6099
ENPP4	0.739808	4.21863	8.09277	3.70142e-15	3.72366e-14	23.6081
EIF4E	-0.397669	4.09026	-8.09072	3.75752e-15	3.77778e-14	23.5933
ANKS3	0.363108	3.83338	8.08768	3.84219e-15	3.86054e-14	23.5715
COMMD2	-0.445314	5.38616	-8.08535	3.90851e-15	3.92477e-14	23.5547
SPI1	-0.865989	4.85674	-8.08236	3.99515e-15	4.00933e-14	23.5332
CCNG2	0.658457	6.09903	8.07983	4.07008e-15	4.08203e-14	23.5149
YBX1	-0.47966	9.59937	-8.07546	4.20286e-15	4.21262e-14	23.4834
ST8SIA4	-0.503906	3.21198	-8.07481	4.22289e-15	4.23011e-14	23.4787
KDSR	-0.367146	5.11207	-8.06704	4.47042e-15	4.47533e-14	23.4228
LRIG1	-0.873961	3.70165	-8.0668	4.47819e-15	4.48038e-14	23.4211
LOXL2	-0.661697	5.02629	-8.06648	4.48859e-15	4.48804e-14	23.4189
RASL10A	0.525213	2.55635	8.06303	4.60346e-15	4.60009e-14	23.3941
TFDP1	-0.548647	6.98909	-8.06234	4.62674e-15	4.62055e-14	23.3891
LAMA4	-0.66484	5.28909	-8.06093	4.67485e-15	4.66575e-14	23.3789
MFSD12	-0.446351	5.45765	-8.06037	4.69415e-15	4.68216e-14	23.3749
PSMD9	-0.309023	4.37562	-8.06027	4.69755e-15	4.68271e-14	23.3742
RAPGEFL1	0.965165	6.52649	8.05948	4.72473e-15	4.70695e-14	23.3685
RECQL	-0.56801	5.36918	-8.05931	4.73084e-15	4.71017e-14	23.3673
IQSEC2	0.436547	4.29123	8.05895	4.7432e-15	4.71961e-14	23.3647
HS6ST3	0.718504	2.27609	8.05701	4.81095e-15	4.78413e-14	23.3508
SLC6A15	-0.540549	1.82733	-8.05373	4.92783e-15	4.89739e-14	23.3272
FSTL3	-0.932171	4.8894	-8.05153	5.00792e-15	4.97397e-14	23.3114
IFIT3	-1.0285	5.23139	-8.05104	5.02598e-15	4.98889e-14	23.3079
FAM118A	0.653621	5.18048	8.0509	5.03123e-15	4.99108e-14	23.3068
SAAL1	-0.372793	5.471	-8.04955	5.08094e-15	5.03734e-14	23.2972
AJUBA	-0.633682	4.59148	-8.04919	5.09439e-15	5.04763e-14	23.2946
KPNA4	-0.360004	6.44572	-8.04845	5.12222e-15	5.07214e-14	23.2893
ZBTB48	0.393702	5.38073	8.04793	5.1416e-15	5.08827e-14	23.2855
ITGB2	-0.988557	5.44865	-8.04726	5.16676e-15	5.11008e-14	23.2808
PC	-0.519518	4.12036	-8.04646	5.19728e-15	5.13717e-14	23.275
KCMF1	-0.293353	5.38657	-8.04299	5.33091e-15	5.26608e-14	23.2501
NOSTRIN	0.416879	3.00434	8.04186	5.37488e-15	5.30632e-14	23.242
NSMF	-0.602976	5.73647	-8.04145	5.39104e-15	5.31908e-14	23.2391
CD96	0.775125	4.1018	8.04112	5.40413e-15	5.32878e-14	23.2367
IQGAP3	-0.726155	5.87163	-8.03694	5.57154e-15	5.49056e-14	23.2067
NCOA7	-0.63771	5.36041	-8.03641	5.59342e-15	5.50881e-14	23.2029
CYTH3	-0.513248	4.59197	-8.03543	5.63361e-15	5.54507e-14	23.1959
CORO6	-0.663444	2.60648	-8.03439	5.67653e-15	5.58396e-14	23.1884
PLEK	-0.894988	4.33365	-8.03255	5.75345e-15	5.65623e-14	23.1752
CDC25C	-0.53567	4.01052	-8.02972	5.87368e-15	5.77098e-14	23.1549
ITGB1	-0.605159	7.98434	-8.02936	5.88879e-15	5.78236e-14	23.1524
HMGCL	0.404229	6.64363	8.02874	5.91587e-15	5.80548e-14	23.1479
LYPD6	0.757868	4.08849	8.02752	5.96871e-15	5.85383e-14	23.1392
RBM5	0.443028	6.65874	8.02725	5.98057e-15	5.86196e-14	23.1372
UVSSA	0.456988	4.13093	8.02654	6.01145e-15	5.88871e-14	23.1322
PKIA	0.998871	4.75338	8.02617	6.02765e-15	5.90105e-14	23.1295
PAPPA	-0.542298	2.64645	-8.02561	6.05249e-15	5.92184e-14	23.1255
VPS26A	-0.404451	6.44529	-8.02453	6.10038e-15	5.96514e-14	23.1177
TEX264	0.36607	6.05669	8.02393	6.12704e-15	5.98764e-14	23.1135
CKAP2	-0.546657	5.71726	-8.02242	6.19473e-15	6.05019e-14	23.1027
PSMB1	-0.343241	9.26928	-8.02185	6.22072e-15	6.07196e-14	23.0986
EIF2S3	-0.393388	8.31217	-8.01788	6.40341e-15	6.24288e-14	23.0702
S100A2	-1.89151	8.11588	-8.01788	6.40344e-15	6.24288e-14	23.0702
ASPA	0.464039	2.27498	8.01236	6.66646e-15	6.49545e-14	23.0307
CRB3	0.641057	5.39628	8.01165	6.70112e-15	6.52534e-14	23.0256
RGS4	-0.692103	2.7872	-8.01121	6.72269e-15	6.54247e-14	23.0224
BRICD5	0.46746	3.55924	8.01041	6.76175e-15	6.57657e-14	23.0167
CAPN9	0.991256	2.92096	8.00745	6.90919e-15	6.716e-14	22.9956
SPTBN5	0.610586	3.33051	8.00435	7.06702e-15	6.86534e-14	22.9734
CASP1	-0.86982	4.73756	-8.00305	7.13471e-15	6.927e-14	22.964
TXK	0.552177	3.02841	8.00255	7.16045e-15	6.94788e-14	22.9605
PCP4L1	1.376	4.4506	8.00207	7.18578e-15	6.96834e-14	22.957
IFI30	-0.622257	4.87714	-8.00004	7.2925e-15	7.06714e-14	22.9426
IL1B	-1.14311	4.58894	-7.99997	7.29628e-15	7.06714e-14	22.9421
UBE2S	-0.587821	6.40789	-7.99913	7.34124e-15	7.10649e-14	22.936
ABCA5	0.518	4.05307	7.99609	7.50533e-15	7.26105e-14	22.9144
SLC23A3	0.513307	3.16091	7.99474	7.57969e-15	7.32867e-14	22.9047
ADSL	-0.366847	7.02936	-7.99449	7.59315e-15	7.33736e-14	22.9029
RHOC	-0.509719	8.12632	-7.99245	7.70709e-15	7.44308e-14	22.8883
ACCS	0.593266	4.66237	7.98465	8.15647e-15	7.87243e-14	22.8327
KRT75	-0.954051	2.22926	-7.98053	8.40495e-15	8.10749e-14	22.8033
CXCL13	-1.25981	4.16059	-7.98006	8.43373e-15	8.13047e-14	22.7999
CPNE8	-0.780366	3.58973	-7.97685	8.63222e-15	8.31694e-14	22.7771
GJB3	-0.955653	5.97988	-7.97311	8.87018e-15	8.54119e-14	22.7504
MASTL	-0.481904	5.65805	-7.96926	9.12134e-15	8.77789e-14	22.723
ARHGAP22	-0.471911	2.61325	-7.96872	9.15724e-15	8.80726e-14	22.7192
CCL13	-0.995786	3.72769	-7.9667	9.29249e-15	8.93212e-14	22.7048
TRHDE	0.769384	2.75851	7.96613	9.33104e-15	8.96392e-14	22.7007
HNMT	0.735478	5.45181	7.96593	9.3448e-15	8.97189e-14	22.6993
LIF	-0.718033	3.67772	-7.96364	9.50153e-15	9.11703e-14	22.6829
NIPAL1	0.865518	5.46056	7.96208	9.60953e-15	9.21527e-14	22.6719
KCTD15	-0.754152	4.04244	-7.9597	9.7768e-15	9.37019e-14	22.6549
DDIT4	-0.920522	7.9508	-7.95956	9.78716e-15	9.37465e-14	22.6539
ANKRD65	0.919792	5.05769	7.95856	9.85828e-15	9.43726e-14	22.6468
HS3ST3B1	-0.436817	2.13034	-7.95778	9.91395e-15	9.48502e-14	22.6413
SLC44A2	0.602333	8.37355	7.95756	9.92983e-15	9.49468e-14	22.6397
RBP1	-1.04953	4.82298	-7.95747	9.93612e-15	9.49516e-14	22.6391
ESCO2	-0.472975	3.32394	-7.95642	1.00119e-14	9.56205e-14	22.6316
PERP	-0.763375	9.27173	-7.95384	1.02014e-14	9.73728e-14	22.6132
PLP2	-0.658633	8.99785	-7.95346	1.02292e-14	9.75821e-14	22.6105
EPS8	0.72547	6.18596	7.95218	1.03245e-14	9.84337e-14	22.6014
PARP16	0.335136	4.37407	7.95048	1.04526e-14	9.95976e-14	22.5893
SPIN4	-0.68143	4.21927	-7.94534	1.08495e-14	1.03319e-13	22.5528
CD53	-0.894291	5.09875	-7.94383	1.09684e-14	1.04391e-13	22.5421
GRPEL1	-0.360164	6.33209	-7.93919	1.13438e-14	1.07901e-13	22.5091
GRWD1	-0.354221	6.10544	-7.93813	1.14306e-14	1.08622e-13	22.5016
HSPA8	-0.582533	10.261	-7.9381	1.14329e-14	1.08622e-13	22.5014
VRK1	-0.460547	6.1669	-7.9374	1.14917e-14	1.09118e-13	22.4964
XDH	-0.893666	4.49412	-7.93601	1.16079e-14	1.10158e-13	22.4865
CALD1	-0.852623	6.6248	-7.93081	1.20529e-14	1.14315e-13	22.4496
ATP6V0E2	0.635585	4.97167	7.93065	1.20665e-14	1.14378e-13	22.4485
CSNK1A1	-0.5006	6.67882	-7.92994	1.21284e-14	1.14898e-13	22.4435
SGSM1	0.650206	2.76694	7.92908	1.22046e-14	1.15553e-13	22.4373
MRPS10	-0.387971	6.87566	-7.92823	1.22794e-14	1.16194e-13	22.4313
CD300E	-0.542961	2.32712	-7.92696	1.23929e-14	1.172e-13	22.4223
TMEM25	0.625872	4.53268	7.92597	1.24814e-14	1.1797e-13	22.4153
RIN2	-0.57514	6.37982	-7.92474	1.25931e-14	1.18956e-13	22.4066
ADHFE1	0.703976	3.6054	7.92225	1.28224e-14	1.21053e-13	22.3889
TMTC2	0.564345	4.51059	7.91985	1.30464e-14	1.23097e-13	22.3719
TRIM45	0.511389	4.20856	7.91841	1.31824e-14	1.24309e-13	22.3617
TNNT1	-1.30316	4.09484	-7.91831	1.31923e-14	1.24331e-13	22.361
GDF15	1.36668	7.26226	7.91819	1.3204e-14	1.2437e-13	22.3601
SKA1	-0.545118	4.22874	-7.91685	1.33322e-14	1.25504e-13	22.3506
ZNF615	0.610663	4.66353	7.91648	1.33676e-14	1.25766e-13	22.348
ACOX3	0.538236	5.88055	7.91416	1.35934e-14	1.27816e-13	22.3316
SLA	-0.681671	3.42778	-7.91106	1.39012e-14	1.30636e-13	22.3096
ANXA3	-1.14626	4.90365	-7.90978	1.40307e-14	1.31778e-13	22.3005
PARM1	0.899138	5.00691	7.90872	1.41384e-14	1.32714e-13	22.293
THRB	0.650679	4.31681	7.90593	1.44262e-14	1.35337e-13	22.2733
PDCD10	-0.421188	6.50749	-7.90563	1.44567e-14	1.35546e-13	22.2712
SSR1	-0.421395	6.25944	-7.90476	1.45482e-14	1.36326e-13	22.265
ZNF285	0.41722	2.88191	7.90392	1.46367e-14	1.37077e-13	22.2591
STK17B	-0.562793	4.77153	-7.89646	1.54451e-14	1.4453e-13	22.2063
HOXB6	0.872595	4.11502	7.89642	1.54501e-14	1.4453e-13	22.206
ACAT1	-0.568419	5.6488	-7.89598	1.54988e-14	1.44903e-13	22.2029
ITGA8	0.599036	3.28879	7.89502	1.56071e-14	1.45832e-13	22.1961
OVOL2	0.636674	4.83848	7.89487	1.56234e-14	1.45901e-13	22.1951
COL6A1	-1.0045	7.72935	-7.89441	1.56749e-14	1.46299e-13	22.1918
MRPL51	-0.37338	8.62549	-7.89175	1.59793e-14	1.49055e-13	22.173
MYLPF	0.489863	2.30209	7.89113	1.60508e-14	1.49637e-13	22.1686
PSMA5	-0.381056	7.30994	-7.89017	1.61622e-14	1.5059e-13	22.1618
ZNF84	0.43958	4.88194	7.88909	1.62878e-14	1.51675e-13	22.1542
UBAP1	-0.407684	6.51888	-7.8848	1.67991e-14	1.56347e-13	22.1239
FXN	-0.347235	3.74613	-7.88361	1.69434e-14	1.576e-13	22.1155
KLHDC7B	-1.42366	4.5374	-7.88321	1.6993e-14	1.57972e-13	22.1126
PGM1	-0.690774	6.83606	-7.88283	1.70394e-14	1.58314e-13	22.11
KLHL3	0.539249	3.47441	7.88241	1.70904e-14	1.58698e-13	22.107
MNDA	-0.77182	3.7349	-7.87911	1.75014e-14	1.62422e-13	22.0837
VRK2	-0.435662	4.85727	-7.87684	1.77896e-14	1.65004e-13	22.0677
TMEM163	0.932875	3.66408	7.87671	1.78061e-14	1.65064e-13	22.0668
INA	1.37941	4.74927	7.87596	1.79029e-14	1.65867e-13	22.0615
INCENP	-0.476679	5.2138	-7.87366	1.82016e-14	1.68539e-13	22.0453
AQP9	-0.764244	3.03584	-7.87121	1.85248e-14	1.71435e-13	22.028
SIGLEC1	-0.669333	2.97917	-7.8676	1.90127e-14	1.75851e-13	22.0025
PYGB	-0.525403	7.35547	-7.8639	1.95239e-14	1.80478e-13	21.9765
POLD1	-0.457981	5.35736	-7.86116	1.99124e-14	1.83965e-13	21.9571
MS4A4A	-0.743843	3.7159	-7.85285	2.11373e-14	1.95172e-13	21.8986
RAB11A	0.396989	7.83433	7.85227	2.12251e-14	1.95873e-13	21.8945
PTPN2	-0.36406	5.27395	-7.85154	2.13376e-14	1.968e-13	21.8893
USP5	-0.376734	7.70007	-7.8513	2.13741e-14	1.97026e-13	21.8877
PRRT3	0.461111	3.37881	7.85066	2.14725e-14	1.97822e-13	21.8832
ROR2	-0.839729	3.35615	-7.84411	2.25058e-14	2.07225e-13	21.8371
CHN2	0.503145	2.75986	7.84225	2.28079e-14	2.09889e-13	21.824
ICOS	-0.559299	2.64959	-7.8387	2.33947e-14	2.15169e-13	21.7991
CRELD1	0.427005	5.75643	7.83813	2.34919e-14	2.15942e-13	21.795
SFXN1	-0.383681	5.75737	-7.83654	2.37602e-14	2.18286e-13	21.7839
ADAMTSL4	-0.933522	4.11851	-7.83335	2.43097e-14	2.23208e-13	21.7615
SLC47A2	-0.473582	1.85349	-7.83166	2.4605e-14	2.2573e-13	21.7496
WFDC1	0.533553	3.24198	7.83163	2.46118e-14	2.2573e-13	21.7493
MPPED2	0.708452	3.04811	7.83139	2.46539e-14	2.25989e-13	21.7477
ID4	0.922215	4.17344	7.82655	2.55236e-14	2.33831e-13	21.7137
SERPINE2	-0.947465	4.11826	-7.82509	2.57917e-14	2.36155e-13	21.7034
KREMEN2	-0.669069	2.86324	-7.82487	2.58313e-14	2.36386e-13	21.7019
ECE1	-0.452352	6.33489	-7.82404	2.59866e-14	2.37674e-13	21.696
GEMIN4	-0.3928	5.23543	-7.82146	2.64693e-14	2.41954e-13	21.678
SAMD13	0.599432	2.93244	7.82138	2.64849e-14	2.41962e-13	21.6774
CDK7	-0.358142	6.40769	-7.82096	2.65657e-14	2.42566e-13	21.6744
HHAT	0.484684	3.84119	7.81387	2.79475e-14	2.5504e-13	21.6247
CARD10	-0.706762	4.48928	-7.81364	2.79933e-14	2.55316e-13	21.6231
CLDND1	-0.434976	6.62016	-7.81262	2.81978e-14	2.57039e-13	21.616
KRT8	0.876685	10.1862	7.81195	2.83335e-14	2.58132e-13	21.6112
HTATIP2	-0.484756	6.36694	-7.81098	2.85312e-14	2.59789e-13	21.6044
DBF4	-0.397184	4.25516	-7.81034	2.86605e-14	2.60821e-13	21.6
FITM1	0.263248	2.27475	7.8057	2.96278e-14	2.69475e-13	21.5674
TST	0.619016	6.92458	7.80493	2.97906e-14	2.70806e-13	21.5621
C11orf91	-0.26733	1.89574	-7.80406	2.99773e-14	2.72352e-13	21.5559
PLA2G4E	-0.837023	2.32294	-7.80339	3.01209e-14	2.73505e-13	21.5513
CRYM	0.713782	2.77318	7.80268	3.02738e-14	2.74742e-13	21.5463
HIGD1B	0.441339	3.05465	7.8025	3.03121e-14	2.74937e-13	21.5451
SULT1A2	0.738083	2.87612	7.80241	3.03318e-14	2.74963e-13	21.5444
PDIA5	-0.498045	5.74341	-7.79988	3.08845e-14	2.79819e-13	21.5267
STAT3	-0.45298	6.84388	-7.79948	3.09726e-14	2.80463e-13	21.5239
C19orf18	0.603189	3.23131	7.79889	3.11055e-14	2.81511e-13	21.5197
CDC6	-0.577659	5.42666	-7.79871	3.11448e-14	2.81711e-13	21.5185
NR1D1	-0.536344	4.77379	-7.7944	3.21184e-14	2.90357e-13	21.4883
POLI	0.431045	3.87814	7.79376	3.22637e-14	2.9151e-13	21.4839
XIRP1	-0.26482	1.7229	-7.79276	3.24966e-14	2.93444e-13	21.4768
TNFRSF14	0.546891	5.85154	7.79268	3.25134e-14	2.93444e-13	21.4763
TYMS	-0.748461	6.64468	-7.79197	3.26795e-14	2.9473e-13	21.4713
OSR1	0.991892	4.2096	7.79192	3.26919e-14	2.9473e-13	21.4709
NLRC4	-0.34174	2.53593	-7.78993	3.31591e-14	2.98778e-13	21.457
CATSPERB	0.511941	2.82334	7.7894	3.32844e-14	2.99742e-13	21.4533
CARD18	-0.590088	1.9501	-7.78809	3.35972e-14	3.02393e-13	21.4442
IL2RB	-0.741735	3.66519	-7.78669	3.39336e-14	3.05254e-13	21.4344
HEATR1	-0.409711	5.68611	-7.78487	3.43761e-14	3.09064e-13	21.4217
TRPV6	0.905581	3.3276	7.78416	3.45509e-14	3.10467e-13	21.4167
OLA1	-0.332401	5.79313	-7.78349	3.4716e-14	3.11779e-13	21.412
ERBB2	0.781476	6.75102	7.78066	3.5424e-14	3.17964e-13	21.3922
PPP6C	-0.338208	6.7154	-7.77923	3.5786e-14	3.21037e-13	21.3823
STOM	-0.734123	6.99918	-7.77915	3.58087e-14	3.21065e-13	21.3817
SOWAHA	0.587657	2.41477	7.77805	3.60907e-14	3.23417e-13	21.374
SDR16C5	-0.90271	2.75085	-7.77791	3.61251e-14	3.23548e-13	21.373
CPSF2	-0.378903	5.45297	-7.77532	3.67974e-14	3.2939e-13	21.355
AIF1	-0.836531	4.61563	-7.7751	3.68572e-14	3.29746e-13	21.3534
MRPS2	-0.377662	6.0604	-7.77335	3.73183e-14	3.33689e-13	21.3412
PPP1R36	0.449612	2.79862	7.77306	3.73953e-14	3.34195e-13	21.3392
UBE2Z	-0.318192	6.9919	-7.76955	3.83425e-14	3.42474e-13	21.3146
DNTTIP2	-0.39616	6.16632	-7.76893	3.85126e-14	3.43805e-13	21.3103
CA2	-1.11647	5.45758	-7.76865	3.85893e-14	3.44303e-13	21.3083
STIP1	-0.396743	8.41464	-7.76759	3.88816e-14	3.46723e-13	21.3009
FOXK1	-0.423097	4.11367	-7.76466	3.97002e-14	3.5383e-13	21.2805
HSD17B12	-0.4391	6.02267	-7.76454	3.97341e-14	3.5394e-13	21.2797
KLHL21	-0.472359	4.94623	-7.76022	4.09753e-14	3.64798e-13	21.2495
HAGH	0.319743	5.71578	7.75981	4.10945e-14	3.65661e-13	21.2467
GGH	-0.800818	6.08732	-7.7593	4.12443e-14	3.66795e-13	21.2431
TYROBP	-0.951876	6.91871	-7.75696	4.19362e-14	3.72746e-13	21.2268
MAPK6	-0.527521	6.22175	-7.75585	4.2266e-14	3.75474e-13	21.2191
KATNA1	-0.365493	5.12176	-7.75536	4.24145e-14	3.76589e-13	21.2157
SNW1	-0.325659	7.05432	-7.75213	4.3399e-14	3.85122e-13	21.1932
MSR1	-0.704847	3.67479	-7.74865	4.44868e-14	3.94562e-13	21.1689
PPP2CA	-0.310765	7.82352	-7.74813	4.46524e-14	3.95817e-13	21.1653
NUP160	-0.450609	5.79682	-7.74727	4.49255e-14	3.98022e-13	21.1593
ZNF547	0.356366	3.13738	7.74557	4.54692e-14	4.02622e-13	21.1475
PDE10A	0.840694	3.45461	7.74435	4.58652e-14	4.0591e-13	21.139
PDCD11	-0.341585	6.28164	-7.74364	4.60991e-14	4.07691e-13	21.134
DNAJB1	-0.464006	7.27666	-7.74358	4.61162e-14	4.07691e-13	21.1336
TIA1	0.467458	6.24243	7.73835	4.78634e-14	4.22865e-13	21.0972
RANBP1	-0.464277	6.88555	-7.73828	4.78842e-14	4.22865e-13	21.0968
LRFN2	0.529007	2.28154	7.73794	4.80006e-14	4.23666e-13	21.0944
MT1A	-0.960763	3.52771	-7.73143	5.02716e-14	4.43471e-13	21.0491
CENPK	-0.539008	4.3149	-7.73058	5.05751e-14	4.45909e-13	21.0432
ATP2A2	-0.462477	7.71988	-7.7304	5.06403e-14	4.46244e-13	21.0419
MT1H	-0.858373	2.78406	-7.73026	5.06912e-14	4.46452e-13	21.0409
RNF207	0.581989	4.49577	7.728	5.15087e-14	4.53409e-13	21.0252
NICN1	0.422058	4.84748	7.72572	5.23491e-14	4.6056e-13	21.0094
LPAR2	0.448274	6.1292	7.72349	5.31827e-14	4.67643e-13	20.9939
CRLF3	-0.341898	4.81053	-7.72209	5.37111e-14	4.72036e-13	20.9842
LIN9	-0.401551	4.29164	-7.72019	5.44403e-14	4.78188e-13	20.971
ALDH5A1	0.740808	5.77463	7.71913	5.48495e-14	4.81525e-13	20.9636
TMEM150A	0.325305	4.49268	7.71897	5.4911e-14	4.81807e-13	20.9625
PKP1	-1.38744	5.83293	-7.71583	5.61454e-14	4.92375e-13	20.9407
FBLN1	1.1332	8.64379	7.71128	5.7986e-14	5.08245e-13	20.9091
DNASE1L2	0.433342	2.76156	7.71111	5.80534e-14	5.08564e-13	20.908
RAI2	0.536551	3.05984	7.71005	5.84907e-14	5.12122e-13	20.9006
PLK3	-0.502303	4.97254	-7.70965	5.86602e-14	5.13331e-13	20.8978
LGALS4	1.2207	3.54481	7.70767	5.9484e-14	5.20263e-13	20.8841
SEH1L	-0.413799	5.18142	-7.70613	6.01395e-14	5.25716e-13	20.8734
ADAMTS15	-0.579275	2.57459	-7.70566	6.03395e-14	5.27183e-13	20.8701
PSMD11	-0.401639	6.52349	-7.70296	6.15024e-14	5.37058e-13	20.8514
DERL1	-0.368202	6.21754	-7.7025	6.17028e-14	5.38521e-13	20.8482
ZWILCH	-0.36973	4.5214	-7.70098	6.23698e-14	5.44053e-13	20.8377
PLEKHA7	0.639083	4.7971	7.69943	6.30557e-14	5.49744e-13	20.827
SLC26A1	0.295089	2.3917	7.69886	6.3312e-14	5.51686e-13	20.823
STK3	-0.421275	4.98961	-7.69722	6.40503e-14	5.57822e-13	20.8116
TIPARP	-0.540382	5.8156	-7.69597	6.46158e-14	5.62449e-13	20.803
SIGLEC9	-0.511421	2.719	-7.6956	6.47841e-14	5.63615e-13	20.8005
SYDE2	0.467728	3.32375	7.69327	6.58593e-14	5.72665e-13	20.7843
ADH6	0.557242	2.21427	7.69254	6.62017e-14	5.75338e-13	20.7792
FXR1	-0.348661	6.16317	-7.69075	6.70466e-14	5.82372e-13	20.7668
HTR1D	-0.561158	2.36273	-7.6904	6.72103e-14	5.83485e-13	20.7644
TGFBR1	-0.512881	5.17207	-7.68903	6.7866e-14	5.88866e-13	20.7549
CHSY1	-0.414456	6.26361	-7.68745	6.86251e-14	5.95138e-13	20.744
RRP36	-0.388008	7.28443	-7.68541	6.96203e-14	6.03449e-13	20.7299
HNRNPC	-0.300685	8.74665	-7.68504	6.98017e-14	6.04702e-13	20.7273
GPS2	0.387034	5.13968	7.68421	7.02108e-14	6.07925e-13	20.7216
BEX4	0.802455	6.79646	7.68366	7.04863e-14	6.09989e-13	20.7178
MLIP	-0.18549	1.68869	-7.68347	7.0579e-14	6.10469e-13	20.7165
COL12A1	-0.939209	6.16928	-7.68252	7.10547e-14	6.1426e-13	20.7099
ELOVL5	-0.673688	5.76585	-7.68033	7.21617e-14	6.23501e-13	20.6947
HRC	0.379739	2.17829	7.68013	7.22616e-14	6.24036e-13	20.6934
TRAM2	-0.516791	4.70123	-7.67954	7.25641e-14	6.26319e-13	20.6893
FGD1	-0.595753	4.34922	-7.67323	7.58694e-14	6.54503e-13	20.6456
EPM2AIP1	0.402328	5.06931	7.67294	7.60239e-14	6.55491e-13	20.6436
ZSCAN4	0.733253	2.81204	7.67109	7.70208e-14	6.63738e-13	20.6309
UBAP1L	0.245927	2.11919	7.67089	7.71302e-14	6.64332e-13	20.6295
DISP1	0.438964	4.02675	7.67047	7.73611e-14	6.65971e-13	20.6266
MYADM	-0.748058	4.90352	-7.6657	8.00013e-14	6.87978e-13	20.5937
COMT	0.533319	7.45853	7.6657	8.00014e-14	6.87978e-13	20.5937
HSD11B1L	0.452037	3.71226	7.66454	8.06578e-14	6.9326e-13	20.5857
GOLGA6L9	0.362663	2.75369	7.66147	8.24207e-14	7.08042e-13	20.5645
SLC25A10	0.520158	5.83917	7.66053	8.29728e-14	7.12094e-13	20.5579
STK32A	0.765737	2.91508	7.66052	8.29793e-14	7.12094e-13	20.5578
B3GALT5	0.606281	2.39046	7.66029	8.31137e-14	7.12874e-13	20.5563
AACS	-0.374923	4.44417	-7.66013	8.32057e-14	7.13291e-13	20.5552
MCM2	-0.698019	6.20484	-7.65782	8.45711e-14	7.24618e-13	20.5392
FAM104B	0.371491	5.17857	7.65584	8.57544e-14	7.34372e-13	20.5256
SHC1	-0.507034	7.18301	-7.65466	8.64705e-14	7.40119e-13	20.5175
C11orf24	-0.381646	5.84193	-7.65343	8.72257e-14	7.46194e-13	20.5089
PRRX1	-0.831054	3.41984	-7.65205	8.80729e-14	7.53049e-13	20.4995
COQ2	-0.451087	4.7918	-7.6513	8.8538e-14	7.56631e-13	20.4943
NOL4L	0.481505	4.16374	7.6503	8.91635e-14	7.61579e-13	20.4874
WDFY2	-0.342213	3.81442	-7.64689	9.13312e-14	7.79689e-13	20.4639
BLOC1S1	0.35698	6.96373	7.64646	9.16064e-14	7.81632e-13	20.4609
ATG3	-0.377757	6.17796	-7.64604	9.18755e-14	7.83521e-13	20.458
MMP11	-1.24067	5.74196	-7.64569	9.21011e-14	7.85036e-13	20.4556
EPSTI1	-0.962579	5.16143	-7.64389	9.32767e-14	7.94643e-13	20.4432
BSPRY	0.692637	4.74299	7.64252	9.4182e-14	8.0194e-13	20.4337
ETV2	0.290101	2.71599	7.63954	9.61736e-14	8.18474e-13	20.4132
TIMM17A	-0.31766	6.20199	-7.63738	9.764e-14	8.30522e-13	20.3984
PPIA	-0.51388	8.23672	-7.63231	1.01183e-13	8.60211e-13	20.3635
ZNF598	-0.341478	5.53204	-7.62999	1.02846e-13	8.739e-13	20.3475
C1S	-1.01739	7.12006	-7.62523	1.0634e-13	9.03115e-13	20.3148
EIF3M	-0.458592	7.73492	-7.62336	1.0774e-13	9.14459e-13	20.3019
ARRDC1	0.426813	6.2205	7.6233	1.07787e-13	9.14459e-13	20.3015
TSNAXIP1	0.340033	2.55992	7.62099	1.09548e-13	9.28922e-13	20.2856
OXCT1	-0.919743	4.89785	-7.61845	1.11517e-13	9.45131e-13	20.2682
SRF	-0.34897	6.44526	-7.61816	1.11743e-13	9.46556e-13	20.2662
FRMD6	-0.726776	5.76791	-7.61761	1.12175e-13	9.49727e-13	20.2624
SBK1	0.952737	3.85563	7.61663	1.12949e-13	9.55782e-13	20.2557
IMMT	-0.330671	7.50199	-7.61625	1.13254e-13	9.57874e-13	20.253
COL6A2	-0.962402	7.68735	-7.61501	1.14239e-13	9.65706e-13	20.2446
NMI	-0.520105	6.25498	-7.61215	1.16555e-13	9.84778e-13	20.2249
TROAP	-0.63235	5.32062	-7.61052	1.17888e-13	9.95529e-13	20.2137
MRC1	-0.728352	4.56167	-7.61035	1.1803e-13	9.96213e-13	20.2126
TBC1D31	-0.371621	4.37112	-7.60912	1.19056e-13	1.00436e-12	20.2041
SULF1	-1.11313	4.92136	-7.60782	1.20145e-13	1.01302e-12	20.1952
MRPS17	-0.392388	6.14387	-7.6071	1.20751e-13	1.01759e-12	20.1902
SHB	-0.479631	4.97909	-7.60703	1.20811e-13	1.01759e-12	20.1898
PKD1L1	0.551455	2.55279	7.6041	1.23315e-13	1.03815e-12	20.1696
DCLK2	0.56027	2.97759	7.60236	1.24825e-13	1.05032e-12	20.1577
FKBP9	-0.465221	6.14425	-7.60113	1.25904e-13	1.05886e-12	20.1493
BDKRB2	-0.483582	3.19034	-7.60033	1.26608e-13	1.06423e-12	20.1438
GHITM	-0.379608	8.55569	-7.59987	1.27019e-13	1.06715e-12	20.1406
RINL	0.520109	3.45571	7.59547	1.30994e-13	1.09997e-12	20.1105
PDP1	-0.535429	5.31205	-7.5905	1.35623e-13	1.13827e-12	20.0764
L1CAM	-1.00681	2.74699	-7.59018	1.35923e-13	1.1402e-12	20.0743
TNIP1	-0.394084	6.74772	-7.58306	1.42865e-13	1.19782e-12	20.0255
ANKRD24	0.4201	2.43123	7.58219	1.43729e-13	1.20445e-12	20.0196
SPANXB1	-0.707505	1.95491	-7.57994	1.46006e-13	1.2224e-12	20.0042
COPS8	-0.326176	5.39238	-7.57993	1.46021e-13	1.2224e-12	20.0041
BMF	0.526503	3.9382	7.57516	1.50962e-13	1.26312e-12	19.9715
FHL3	-0.473567	5.11723	-7.57505	1.51082e-13	1.26348e-12	19.9707
STX19	-0.595632	2.41316	-7.5719	1.54437e-13	1.29088e-12	19.9492
RFC2	-0.413963	6.17969	-7.57108	1.55323e-13	1.29763e-12	19.9436
CD59	-0.584626	7.69548	-7.57076	1.55673e-13	1.29986e-12	19.9414
CD101	-0.347826	2.50528	-7.57069	1.55749e-13	1.29986e-12	19.9409
ACOT11	0.63008	4.73429	7.57	1.56499e-13	1.30546e-12	19.9362
ADIRF	0.569103	5.09459	7.56869	1.57935e-13	1.31618e-12	19.9272
PPP1R32	0.35193	2.73258	7.56868	1.57944e-13	1.31618e-12	19.9272
RNF223	0.682384	3.47734	7.5676	1.59138e-13	1.32545e-12	19.9198
JAG1	-0.780513	7.06521	-7.567	1.59813e-13	1.3304e-12	19.9156
TCP1	-0.436832	7.894	-7.56568	1.6129e-13	1.34201e-12	19.9066
VMA21	-0.33648	6.02934	-7.56423	1.62926e-13	1.35493e-12	19.8967
GPRASP1	0.367309	3.46559	7.56266	1.64719e-13	1.36915e-12	19.886
TMEM17	-0.329343	2.99896	-7.55931	1.68608e-13	1.40077e-12	19.8632
UGT2B15	0.949187	2.46983	7.55895	1.69031e-13	1.40295e-12	19.8607
ADAP2	-0.564193	4.44751	-7.55894	1.69042e-13	1.40295e-12	19.8606
TRIML2	-0.612624	1.85572	-7.55767	1.70551e-13	1.41476e-12	19.8519
TNFRSF21	0.788707	9.26275	7.557	1.71344e-13	1.42062e-12	19.8474
DDX60	-0.819472	5.11171	-7.55486	1.73925e-13	1.44129e-12	19.8327
ETS2	-0.586992	7.48035	-7.55188	1.77575e-13	1.4708e-12	19.8124
SV2C	0.253513	1.84664	7.55116	1.78458e-13	1.47698e-12	19.8075
RSAD1	0.340487	5.37822	7.55113	1.78501e-13	1.47698e-12	19.8073
TUBGCP6	0.409662	5.59566	7.54954	1.80485e-13	1.49264e-12	19.7965
INSR	0.419922	5.38003	7.54941	1.80653e-13	1.49328e-12	19.7956
PDGFD	0.573509	3.58127	7.54771	1.828e-13	1.51027e-12	19.784
SERPINB8	-0.508354	4.2814	-7.54737	1.83233e-13	1.51308e-12	19.7817
EFHC1	0.45743	4.49556	7.54657	1.84251e-13	1.52037e-12	19.7762
BDKRB1	-0.51631	2.75859	-7.54654	1.84301e-13	1.52037e-12	19.776
STK38L	-0.45088	5.20626	-7.54498	1.86307e-13	1.53603e-12	19.7654
ZNF652	0.351276	4.62382	7.54492	1.86387e-13	1.53603e-12	19.765
MSH6	-0.487267	6.41577	-7.54426	1.87245e-13	1.54233e-12	19.7605
RRAS	-0.644873	6.74241	-7.544	1.8758e-13	1.54431e-12	19.7587
STK36	0.459778	5.74725	7.54237	1.89715e-13	1.56111e-12	19.7476
AFAP1	-0.541139	4.20147	-7.53591	1.98437e-13	1.63205e-12	19.7036
ZNF662	0.920882	3.76326	7.53362	2.01627e-13	1.65746e-12	19.688
PPP3CA	-0.401541	5.83138	-7.5311	2.05188e-13	1.68589e-12	19.6708
SAMHD1	-0.626623	6.25064	-7.52652	2.11818e-13	1.73949e-12	19.6397
IVD	0.44095	5.69656	7.52598	2.12621e-13	1.74521e-12	19.636
[truncated: 14,409 more rows]
