# Supplementary material for: A Novel m7G-Related Genes-Based Signature with Prognostic Value and Predictive Ability to Select Patients Responsive to Personalized Treatment Strategies in Bladder Cancer
Source: Cancers (Basel). 2022 Oct 29;14(21):5346. doi: 10.3390/cancers14215346 (PMC9656096; doi:10.3390/cancers14215346)
Supplement: Supplementary file 1 [file cancers-14-05346-s001.zip › Table S6.xlsx]

## Sheet: Table S5
sample	OS	OS.time	Cluster
TCGA-2F-A9KO-01A	1	734	Cluster1
TCGA-2F-A9KR-01A	1	3183	Cluster1
TCGA-2F-A9KT-01A	0	2352	Cluster1
TCGA-4Z-AA7N-01A	1	1367	Cluster1
TCGA-4Z-AA7Q-01A	1	510	Cluster1
TCGA-4Z-AA7W-01A	0	840	Cluster1
TCGA-4Z-AA82-01A	1	1556	Cluster1
TCGA-4Z-AA86-01A	1	311	Cluster1
TCGA-5N-A9KI-01A	1	76	Cluster1
TCGA-BL-A13I-01A	1	223	Cluster1
TCGA-BL-A13J-01A	1	81	Cluster1
TCGA-BL-A3JM-01A	1	205	Cluster1
TCGA-BL-A5ZZ-01A	0	377	Cluster1
TCGA-BT-A0S7-01A	1	200	Cluster1
TCGA-BT-A0YX-01A	1	400	Cluster1
TCGA-BT-A20J-01A	1	579	Cluster1
TCGA-BT-A20O-01A	1	370	Cluster1
TCGA-BT-A20R-01A	1	154	Cluster1
TCGA-BT-A20T-01A	1	453	Cluster1
TCGA-BT-A20U-01A	1	455	Cluster1
TCGA-BT-A20V-01A	1	154	Cluster1
TCGA-BT-A20X-01A	1	251	Cluster1
TCGA-BT-A2LB-01A	1	492	Cluster1
TCGA-BT-A2LD-01A	1	623	Cluster1
TCGA-BT-A3PJ-01A	0	789	Cluster1
TCGA-BT-A3PK-01A	1	303	Cluster1
TCGA-BT-A42E-01A	0	1108	Cluster1
TCGA-BT-A42F-01A	0	864	Cluster1
TCGA-C4-A0EZ-01A	1	273	Cluster1
TCGA-C4-A0F0-01A	0	59	Cluster1
TCGA-C4-A0F1-01A	0	89	Cluster1
TCGA-C4-A0F7-01A	1	62	Cluster1
TCGA-CF-A1HS-01A	0	382	Cluster1
TCGA-CU-A0YN-01A	1	393	Cluster1
TCGA-CU-A3KJ-01A	0	562	Cluster1
TCGA-CU-A72E-01A	1	413	Cluster1
TCGA-DK-A1A5-01A	1	65	Cluster1
TCGA-DK-A1AB-01A	1	508	Cluster1
TCGA-DK-A1AE-01A	0	491	Cluster1
TCGA-DK-A1AF-01A	0	536	Cluster1
TCGA-DK-A2HX-01A	1	1420	Cluster1
TCGA-DK-A2I2-01A	1	237	Cluster1
TCGA-DK-A2I4-01A	0	3835	Cluster1
TCGA-DK-A2I6-01A	0	2656	Cluster1
TCGA-DK-A3IM-01A	1	248	Cluster1
TCGA-DK-A3IN-01A	1	250	Cluster1
TCGA-DK-A3IQ-01A	1	539	Cluster1
TCGA-DK-A3IU-01A	1	706	Cluster1
TCGA-DK-A3WW-01A	0	633	Cluster1
TCGA-DK-A3WX-01A	1	321	Cluster1
TCGA-DK-A3WY-01A	0	4967	Cluster1
TCGA-DK-A6B5-01A	0	1542	Cluster1
TCGA-DK-AA6L-01A	1	1163	Cluster1
TCGA-DK-AA6M-01A	0	1582	Cluster1
TCGA-DK-AA6Q-01A	1	413	Cluster1
TCGA-DK-AA6R-01A	0	5041	Cluster1
TCGA-DK-AA6S-01A	0	5050	Cluster1
TCGA-DK-AA6W-01A	1	415	Cluster1
TCGA-DK-AA74-01A	0	1708	Cluster1
TCGA-E7-A3X6-01A	1	904	Cluster1
TCGA-E7-A7DV-01A	0	37	Cluster1
TCGA-E7-A7XN-01A	0	428	Cluster1
TCGA-E7-A97P-01A	1	437	Cluster1
TCGA-FD-A3B3-01A	1	974	Cluster1
TCGA-FD-A3B4-01A	1	510	Cluster1
TCGA-FD-A3B5-01A	1	272	Cluster1
TCGA-FD-A3B6-01A	1	1005	Cluster1
TCGA-FD-A3B7-01A	1	122	Cluster1
TCGA-FD-A3B8-01A	0	384	Cluster1
TCGA-FD-A3N5-01A	1	685	Cluster1
TCGA-FD-A3N6-01A	0	851	Cluster1
TCGA-FD-A3SN-01A	0	887	Cluster1
TCGA-FD-A3SO-01A	1	168	Cluster1
TCGA-FD-A3SP-01A	0	783	Cluster1
TCGA-FD-A3SQ-01A	1	1423	Cluster1
TCGA-FD-A3SR-01A	1	602	Cluster1
TCGA-FD-A3SS-01A	1	391	Cluster1
TCGA-FD-A43S-01A	0	455	Cluster1
TCGA-FD-A43Y-01A	1	474	Cluster1
TCGA-FD-A5BR-01A	0	813	Cluster1
TCGA-FD-A5BS-01A	0	1639	Cluster1
TCGA-FD-A5BT-01A	1	328	Cluster1
TCGA-FD-A5BU-01A	0	588	Cluster1
TCGA-FD-A5BX-01A	1	173	Cluster1
TCGA-FD-A5BY-01A	0	251	Cluster1
TCGA-FD-A5BZ-01A	1	835	Cluster1
TCGA-FD-A5C1-01A	0	1792	Cluster1
TCGA-FD-A62N-01A	0	82	Cluster1
TCGA-FD-A62P-01A	1	191	Cluster1
TCGA-FD-A62S-01A	1	406	Cluster1
TCGA-FD-A6TB-01A	0	572	Cluster1
TCGA-FD-A6TD-01A	1	386	Cluster1
TCGA-FD-A6TF-01A	1	69	Cluster1
TCGA-FD-A6TH-01A	1	131	Cluster1
TCGA-FD-A6TK-01A	0	330	Cluster1
TCGA-FJ-A871-01A	1	272	Cluster1
TCGA-FT-A61P-01A	0	337	Cluster1
TCGA-G2-A2EF-01A	0	1884	Cluster1
TCGA-G2-A2EJ-01A	0	1460	Cluster1
TCGA-G2-A2EO-01A	1	1804	Cluster1
TCGA-G2-A2ES-01A	1	1004	Cluster1
TCGA-G2-A3IB-01A	1	220	Cluster1
TCGA-G2-AA3C-01A	1	211	Cluster1
TCGA-GC-A3I6-01A	1	630	Cluster1
TCGA-GC-A3OO-01A	0	481	Cluster1
TCGA-GC-A3RC-01A	0	484	Cluster1
TCGA-GC-A3WC-01A	0	540	Cluster1
TCGA-GC-A3YS-01A	0	758	Cluster1
TCGA-GD-A3OQ-01A	0	95	Cluster1
TCGA-GD-A3OS-01A	0	638	Cluster1
TCGA-GU-A42Q-01A	1	344	Cluster1
TCGA-GU-A762-01A	1	232	Cluster1
TCGA-GU-A764-01A	0	610	Cluster1
TCGA-GU-A766-01A	0	480	Cluster1
TCGA-GU-AATO-01A	1	324	Cluster1
TCGA-GU-AATQ-01A	1	213	Cluster1
TCGA-GV-A40E-01A	1	261	Cluster1
TCGA-HQ-A5ND-01A	1	274	Cluster1
TCGA-HQ-A5NE-01A	1	370	Cluster1
TCGA-K4-A3WS-01A	0	761	Cluster1
TCGA-K4-A3WV-01A	0	646	Cluster1
TCGA-K4-A4AC-01A	1	278	Cluster1
TCGA-K4-A54R-01A	0	842	Cluster1
TCGA-K4-A5RH-01A	0	276	Cluster1
TCGA-K4-A5RI-01A	1	356	Cluster1
TCGA-K4-A5RJ-01A	0	539	Cluster1
TCGA-K4-A6FZ-01A	0	55	Cluster1
TCGA-K4-A83P-01A	0	495	Cluster1
TCGA-LC-A66R-01A	0	466	Cluster1
TCGA-PQ-A6FI-01A	0	372	Cluster1
TCGA-PQ-A6FN-01A	0	507	Cluster1
TCGA-R3-A69X-01A	0	433	Cluster1
TCGA-SY-A9G0-01A	1	1008	Cluster1
TCGA-SY-A9G5-01A	0	1186	Cluster1
TCGA-UY-A78L-01A	0	1127	Cluster1
TCGA-UY-A78P-01A	0	2380	Cluster1
TCGA-UY-A8OB-01A	0	2109	Cluster1
TCGA-UY-A9PB-01A	0	899	Cluster1
TCGA-XF-A8HD-01A	0	2964	Cluster1
TCGA-XF-A8HE-01A	0	3817	Cluster1
TCGA-XF-A9SI-01A	0	2423	Cluster1
TCGA-XF-A9SJ-01A	1	98	Cluster1
TCGA-XF-A9SK-01A	1	486	Cluster1
TCGA-XF-A9SL-01A	1	2020	Cluster1
TCGA-XF-A9SM-01A	0	1048	Cluster1
TCGA-XF-A9SW-01A	1	362	Cluster1
TCGA-XF-A9SX-01A	1	719	Cluster1
TCGA-XF-A9SY-01A	0	640	Cluster1
TCGA-XF-A9SZ-01A	1	859	Cluster1
TCGA-XF-A9T2-01A	1	575	Cluster1
TCGA-XF-A9T3-01A	0	68	Cluster1
TCGA-XF-A9T4-01A	1	495	Cluster1
TCGA-XF-A9T5-01A	0	2027	Cluster1
TCGA-XF-A9T6-01A	0	64	Cluster1
TCGA-XF-A9T8-01A	1	418	Cluster1
TCGA-XF-AAME-01A	1	2828	Cluster1
TCGA-XF-AAMJ-01A	1	1670	Cluster1
TCGA-XF-AAMR-01A	0	2790	Cluster1
TCGA-XF-AAMT-01A	1	90	Cluster1
TCGA-XF-AAMW-01A	1	253	Cluster1
TCGA-XF-AAN0-01A	1	1718	Cluster1
TCGA-XF-AAN2-01A	1	1869	Cluster1
TCGA-XF-AAN3-01A	0	2625	Cluster1
TCGA-XF-AAN4-01A	1	823	Cluster1
TCGA-XF-AAN5-01A	0	2293	Cluster1
TCGA-XF-AAN7-01A	1	565	Cluster1
TCGA-XF-AAN8-01A	1	118	Cluster1
TCGA-YC-A8S6-01A	0	293	Cluster1
TCGA-YC-A9TC-01A	1	20	Cluster1
TCGA-YF-AA3M-01A	0	415	Cluster1
TCGA-ZF-A9RD-01A	1	408	Cluster1
TCGA-ZF-A9RE-01A	1	106	Cluster1
TCGA-ZF-A9RF-01A	0	1949	Cluster1
TCGA-ZF-A9RN-01A	1	615	Cluster1
TCGA-ZF-AA4N-01A	1	88	Cluster1
TCGA-ZF-AA4R-01A	1	1036	Cluster1
TCGA-ZF-AA4V-01A	0	1806	Cluster1
TCGA-ZF-AA4W-01A	0	1830	Cluster1
TCGA-ZF-AA52-01A	1	1077	Cluster1
TCGA-ZF-AA53-01A	0	1761	Cluster1
TCGA-ZF-AA54-01A	1	590	Cluster1
TCGA-ZF-AA56-01A	1	259	Cluster1
TCGA-ZF-AA58-01A	0	1649	Cluster1
TCGA-ZF-AA5H-01A	0	897	Cluster1
TCGA-ZF-AA5P-01A	0	372	Cluster1
GSM340612	0	3898	Cluster1
GSM340613	1	377	Cluster1
GSM340628	0	3615	Cluster1
GSM340629	1	1513	Cluster1
GSM340645	1	1071	Cluster1
GSM340650	0	2582	Cluster1
GSM340654	1	308	Cluster1
GSM340660	0	2449	Cluster1
GSM340663	0	2362	Cluster1
GSM340664	1	2122	Cluster1
GSM340670	0	2225	Cluster1
GSM340672	1	453	Cluster1
GSM340674	0	2083	Cluster1
GSM340675	1	751	Cluster1
GSM340677	0	1957	Cluster1
GSM340678	1	359	Cluster1
GSM340684	1	312	Cluster1
GSM340687	0	1762	Cluster1
GSM340693	0	1694	Cluster1
GSM340696	1	345	Cluster1
GSM340697	1	536	Cluster1
GSM340699	1	529	Cluster1
GSM340701	0	1453	Cluster1
GSM340702	1	135	Cluster1
GSM340704	1	157	Cluster1
GSM340705	0	1368	Cluster1
GSM340706	0	1354	Cluster1
GSM340709	1	178	Cluster1
GSM340711	0	1254	Cluster1
GSM340714	0	1193	Cluster1
GSM340715	0	1169	Cluster1
GSM340718	0	1105	Cluster1
GSM340720	0	843	Cluster1
GSM340722	1	706	Cluster1
GSM340724	0	1046	Cluster1
GSM340725	0	1027	Cluster1
GSM340727	1	332	Cluster1
GSM340728	1	173	Cluster1
GSM340731	1	277	Cluster1
GSM340732	1	213	Cluster1
GSM340733	1	514	Cluster1
GSM340742	0	717	Cluster1
GSM340745	1	64	Cluster1
GSM340746	0	668	Cluster1
GSM340749	0	649	Cluster1
GSM340750	0	642	Cluster1
GSM340758	1	464	Cluster1
GSM340759	1	793	Cluster1
GSM340761	1	192	Cluster1
GSM340763	0	544	Cluster1
GSM340766	0	326	Cluster1
GSM340769	0	159	Cluster1
SAM00b9e5c52da9	1	57	Cluster1
SAM025b45c27e05	1	263	Cluster1
SAM032c642382a7	1	75	Cluster1
SAM04c589eb3fb3	0	21	Cluster1
SAM0a7c2091dd56	1	79	Cluster1
SAM0d855cff64e6	1	86	Cluster1
SAM166a419a4e5a	1	162	Cluster1
SAM19fec8f3b3bd	1	297	Cluster1
SAM1a87df750b9d	1	162	Cluster1
SAM1c0ecfb3eb63	1	175	Cluster1
SAM1c8b086175ca	1	623	Cluster1
SAM1dda30f1c5be	0	638	Cluster1
SAM1e9c4d1d39ae	1	373	Cluster1
SAM1f66db567eb5	0	498	Cluster1
SAM2624229effe8	1	77	Cluster1
SAM297c0301e861	1	242	Cluster1
SAM2dc578e0165f	1	59	Cluster1
SAM2e9ac0b1b250	0	664	Cluster1
SAM2eb07dedf07f	0	615	Cluster1
SAM2f228939632f	1	237	Cluster1
SAM30b5c6c54cf7	1	278	Cluster1
SAM30cf07d4874f	1	350	Cluster1
SAM31d9176e11fb	0	514	Cluster1
SAM34430ef08e5b	0	545	Cluster1
SAM36a9225b0222	0	715	Cluster1
SAM39eb94fa504d	1	537	Cluster1
SAM3b15b4c6311d	0	644	Cluster1
SAM3f446449bf81	1	23	Cluster1
SAM415f36ad349e	1	539	Cluster1
SAM4501e41e4751	1	34	Cluster1
SAM45c8e6412c66	1	104	Cluster1
SAM47fc46c3d6be	0	562	Cluster1
SAM49d48750e294	1	296	Cluster1
SAM4edbe45817b3	1	32	Cluster1
SAM59f392864f5d	1	533	Cluster1
SAM5c139c5c1c4f	1	217	Cluster1
SAM5fc9ae0aed1f	1	19	Cluster1
SAM63405b04ab2d	1	204	Cluster1
SAM65afda25b920	1	242	Cluster1
SAM6662f5181f87	0	579	Cluster1
SAM670649e105b5	0	662	Cluster1
SAM6780ed436b55	1	187	Cluster1
SAM698d8d76b934	1	13	Cluster1
SAM6cbc10abddb0	1	178	Cluster1
SAM6dd7ad1d797d	1	579	Cluster1
SAM7538ad9ff524	0	574	Cluster1
SAM771445e92421	0	583	Cluster1
SAM7829a341b9f3	1	116	Cluster1
SAM7893196e0e89	1	80	Cluster1
SAM7aa01fc49a80	1	64	Cluster1
SAM7f0d9cc7f001	1	139	Cluster1
SAM7fb6987514a4	0	685	Cluster1
SAM85e41e7f33f9	1	19	Cluster1
SAM8884fe446d20	0	695	Cluster1
SAM9410b866974a	1	202	Cluster1
SAM943df5cf15df	1	64	Cluster1
SAM9681450bbc90	1	149	Cluster1
SAM978a587b207e	1	63	Cluster1
SAM9a2cf3c06fb3	1	170	Cluster1
SAM9e11ec6bea80	1	462	Cluster1
SAM9fb814c22bdb	1	574	Cluster1
SAMa9ca8536d2b1	0	655	Cluster1
SAMaf42c1541269	0	166	Cluster1
SAMb15ad09d6e24	1	116	Cluster1
SAMb2e4a082541a	1	131	Cluster1
SAMb2f1d0e54ece	1	342	Cluster1
SAMb419a8fcbfcd	0	682	Cluster1
SAMb8101c538753	1	402	Cluster1
SAMb963dda93cfd	1	83	Cluster1
SAMba1a34b5a060	1	385	Cluster1
SAMbcb07ba81cee	1	76	Cluster1
SAMbfdffb97c446	1	201	Cluster1
SAMc0d625a50eb8	1	398	Cluster1
SAMc1251c7bfee2	0	649	Cluster1
SAMc2a1820d4e6b	0	622	Cluster1
SAMc919aebc7fdd	0	622	Cluster1
SAMce39dd79b441	1	188	Cluster1
SAMd135d5867fe3	1	108	Cluster1
SAMd1bd63734394	1	58	Cluster1
SAMd215b503f99a	0	51	Cluster1
SAMd636e3461955	1	314	Cluster1
SAMd7d57ee3a863	0	608	Cluster1
SAMdf3e42c8672a	1	220	Cluster1
SAMe0c49ea0df5d	1	124	Cluster1
SAMe1eb5d988760	0	632	Cluster1
SAMe41b1e773582	1	26	Cluster1
SAMe7e4f7c076a7	1	59	Cluster1
SAMe9475f77504b	0	560	Cluster1
SAMe9ae8beb82fa	1	165	Cluster1
SAMeb587a68006b	0	621	Cluster1
SAMfb7aec7cb0e2	0	676	Cluster1
SAMfd947610629d	1	271	Cluster1
TCGA-2F-A9KP-01A	1	364	Cluster2
TCGA-2F-A9KQ-01A	0	2886	Cluster2
TCGA-2F-A9KW-01A	1	254	Cluster2
TCGA-4Z-AA7M-01A	0	495	Cluster2
TCGA-4Z-AA7O-01A	0	512	Cluster2
TCGA-4Z-AA7R-01A	1	522	Cluster2
TCGA-4Z-AA7S-01A	1	1064	Cluster2
TCGA-4Z-AA7Y-01A	0	1522	Cluster2
TCGA-4Z-AA80-01A	1	19	Cluster2
TCGA-4Z-AA81-01A	1	1270	Cluster2
TCGA-4Z-AA83-01A	0	2024	Cluster2
TCGA-4Z-AA84-01A	0	460	Cluster2
TCGA-4Z-AA87-01A	0	1454	Cluster2
TCGA-4Z-AA89-01A	0	1029	Cluster2
TCGA-5N-A9KM-01A	1	530	Cluster2
TCGA-BL-A0C8-01A	0	1219	Cluster2
TCGA-BT-A20N-01A	1	795	Cluster2
TCGA-BT-A20P-01A	1	544	Cluster2
TCGA-BT-A20Q-01A	1	593	Cluster2
TCGA-BT-A20W-01A	1	254	Cluster2
TCGA-BT-A2LA-01A	0	522	Cluster2
TCGA-BT-A3PH-01A	1	142	Cluster2
TCGA-BT-A42C-01A	0	873	Cluster2
TCGA-C4-A0F6-01A	0	700	Cluster2
TCGA-CF-A1HR-01A	0	389	Cluster2
TCGA-CF-A27C-01A	0	425	Cluster2
TCGA-CF-A3MF-01A	0	383	Cluster2
TCGA-CF-A3MG-01A	0	369	Cluster2
TCGA-CF-A3MH-01A	0	398	Cluster2
TCGA-CF-A3MI-01A	0	370	Cluster2
TCGA-CF-A47S-01A	0	333	Cluster2
TCGA-CF-A47T-01A	1	385	Cluster2
TCGA-CF-A47V-01A	0	379	Cluster2
TCGA-CF-A47W-01A	0	368	Cluster2
TCGA-CF-A47X-01A	0	384	Cluster2
TCGA-CF-A47Y-01A	0	373	Cluster2
TCGA-CF-A5U8-01A	0	399	Cluster2
TCGA-CF-A5UA-01A	0	365	Cluster2
TCGA-CF-A7I0-01A	0	368	Cluster2
TCGA-CF-A8HX-01A	0	345	Cluster2
TCGA-CF-A8HY-01A	0	345	Cluster2
TCGA-CF-A9FF-01A	0	361	Cluster2
TCGA-CF-A9FL-01A	1	565	Cluster2
TCGA-CF-A9FM-01A	0	398	Cluster2
TCGA-CU-A0YO-01A	1	149	Cluster2
TCGA-CU-A0YR-01A	1	460	Cluster2
TCGA-CU-A3QU-01A	0	158	Cluster2
TCGA-CU-A3YL-01A	0	906	Cluster2
TCGA-CU-A5W6-01A	1	56	Cluster2
TCGA-DK-A1A3-01A	1	665	Cluster2
TCGA-DK-A1A6-01A	0	2020	Cluster2
TCGA-DK-A1A7-01A	0	560	Cluster2
TCGA-DK-A1AA-01A	0	578	Cluster2
TCGA-DK-A1AC-01A	0	3981	Cluster2
TCGA-DK-A1AD-01A	0	3420	Cluster2
TCGA-DK-A1AG-01A	0	475	Cluster2
TCGA-DK-A2I1-01A	0	546	Cluster2
TCGA-DK-A3IK-01A	1	146	Cluster2
TCGA-DK-A3IL-01A	1	413	Cluster2
TCGA-DK-A3IS-01A	0	1529	Cluster2
TCGA-DK-A3IT-01A	0	648	Cluster2
TCGA-DK-A3IV-01A	1	294	Cluster2
TCGA-DK-A3X1-01A	0	2009	Cluster2
TCGA-DK-A3X2-01A	1	547	Cluster2
TCGA-DK-A6AV-01A	0	1952	Cluster2
TCGA-DK-A6AW-01A	0	1621	Cluster2
TCGA-DK-A6B0-01A	0	2330	Cluster2
TCGA-DK-A6B1-01A	0	2049	Cluster2
TCGA-DK-A6B2-01A	0	477	Cluster2
TCGA-DK-A6B6-01A	0	1115	Cluster2
TCGA-DK-AA6P-01A	0	457	Cluster2
TCGA-DK-AA6T-01A	0	572	Cluster2
TCGA-DK-AA6U-01A	0	578	Cluster2
TCGA-DK-AA6X-01A	0	467	Cluster2
TCGA-DK-AA71-01A	0	415	Cluster2
TCGA-DK-AA75-01A	1	340	Cluster2
TCGA-DK-AA76-01A	0	366	Cluster2
TCGA-DK-AA77-01A	0	618	Cluster2
TCGA-E5-A2PC-01A	0	1326	Cluster2
TCGA-E5-A4TZ-01A	1	467	Cluster2
TCGA-E5-A4U1-01A	0	1181	Cluster2
TCGA-E7-A3Y1-01A	0	163	Cluster2
TCGA-E7-A4IJ-01A	1	674	Cluster2
TCGA-E7-A4XJ-01A	1	68	Cluster2
TCGA-E7-A519-01A	0	508	Cluster2
TCGA-E7-A541-01A	1	778	Cluster2
TCGA-E7-A5KE-01A	0	17	Cluster2
TCGA-E7-A5KF-01A	0	20	Cluster2
TCGA-E7-A677-01A	0	820	Cluster2
TCGA-E7-A678-01A	0	798	Cluster2
TCGA-E7-A6MD-01A	0	129	Cluster2
TCGA-E7-A6ME-01A	0	731	Cluster2
TCGA-E7-A6MF-01A	0	750	Cluster2
TCGA-E7-A7DU-01A	0	28	Cluster2
TCGA-E7-A7PW-01A	0	416	Cluster2
TCGA-E7-A85H-01A	0	394	Cluster2
TCGA-E7-A8O7-01A	0	466	Cluster2
TCGA-E7-A8O8-01A	0	13	Cluster2
TCGA-E7-A97Q-01A	1	246	Cluster2
TCGA-FD-A3NA-01A	0	1845	Cluster2
TCGA-FD-A3SJ-01A	1	739	Cluster2
TCGA-FD-A3SL-01A	1	712	Cluster2
TCGA-FD-A3SM-01A	1	547	Cluster2
TCGA-FD-A43N-01A	0	699	Cluster2
TCGA-FD-A43P-01A	0	832	Cluster2
TCGA-FD-A43U-01A	0	636	Cluster2
TCGA-FD-A43X-01A	0	110	Cluster2
TCGA-FD-A5BV-01A	1	163	Cluster2
TCGA-FD-A5C0-01A	1	550	Cluster2
TCGA-FD-A62O-01A	1	216	Cluster2
TCGA-FD-A6TA-01A	0	1912	Cluster2
TCGA-FD-A6TC-01A	0	187	Cluster2
TCGA-FD-A6TE-01A	0	376	Cluster2
TCGA-FD-A6TG-01A	1	93	Cluster2
TCGA-FD-A6TI-01A	1	294	Cluster2
TCGA-FJ-A3Z7-01A	0	945	Cluster2
TCGA-FJ-A3Z9-01A	1	385	Cluster2
TCGA-FJ-A3ZE-01A	1	324	Cluster2
TCGA-FJ-A3ZF-01A	0	524	Cluster2
TCGA-FT-A3EE-01A	1	99	Cluster2
TCGA-G2-A2EC-01A	1	696	Cluster2
TCGA-G2-A2EK-01A	0	485	Cluster2
TCGA-G2-A2EL-01A	1	819	Cluster2
TCGA-G2-A3IE-01A	1	612	Cluster2
TCGA-G2-A3VY-01A	0	536	Cluster2
TCGA-G2-AA3B-01A	0	2008	Cluster2
TCGA-G2-AA3D-01A	0	2139	Cluster2
TCGA-G2-AA3F-01A	0	893	Cluster2
TCGA-GC-A3BM-01A	1	651	Cluster2
TCGA-GC-A3RB-01A	0	582	Cluster2
TCGA-GC-A3RD-01A	0	428	Cluster2
TCGA-GC-A4ZW-01A	0	15	Cluster2
TCGA-GD-A2C5-01A	0	812	Cluster2
TCGA-GD-A3OP-01A	0	64	Cluster2
TCGA-GD-A6C6-01A	0	67	Cluster2
TCGA-GD-A76B-01A	1	224	Cluster2
TCGA-GU-A42P-01A	1	332	Cluster2
TCGA-GU-A42R-01A	1	577	Cluster2
TCGA-GU-A763-01A	0	997	Cluster2
TCGA-GU-A767-01A	1	144	Cluster2
TCGA-GU-AATP-01A	0	1003	Cluster2
TCGA-GV-A3JV-01A	1	434	Cluster2
TCGA-GV-A3JW-01A	0	649	Cluster2
TCGA-GV-A3JX-01A	0	581	Cluster2
TCGA-GV-A3JZ-01A	0	603	Cluster2
TCGA-GV-A3QF-01A	1	617	Cluster2
TCGA-GV-A3QH-01A	1	258	Cluster2
TCGA-GV-A3QI-01A	0	1110	Cluster2
TCGA-GV-A40G-01A	0	580	Cluster2
TCGA-GV-A6ZA-01A	0	691	Cluster2
TCGA-H4-A2HO-01A	0	46	Cluster2
TCGA-H4-A2HQ-01A	0	590	Cluster2
TCGA-HQ-A2OE-01A	0	1174	Cluster2
TCGA-HQ-A2OF-01A	0	1947	Cluster2
TCGA-K4-A6MB-01A	0	469	Cluster2
TCGA-K4-AAQO-01A	0	359	Cluster2
TCGA-KQ-A41N-01A	0	1604	Cluster2
TCGA-KQ-A41O-01A	0	1538	Cluster2
TCGA-KQ-A41P-01A	0	1094	Cluster2
TCGA-KQ-A41Q-01A	0	361	Cluster2
TCGA-KQ-A41R-01A	0	1350	Cluster2
TCGA-KQ-A41S-01A	0	35	Cluster2
TCGA-LT-A5Z6-01A	0	474	Cluster2
TCGA-LT-A8JT-01A	0	641	Cluster2
TCGA-MV-A51V-01A	0	410	Cluster2
TCGA-S5-A6DX-01A	1	56	Cluster2
TCGA-S5-AA26-01A	0	503	Cluster2
TCGA-UY-A78K-01A	1	536	Cluster2
TCGA-UY-A78M-01A	1	690	Cluster2
TCGA-UY-A78N-01A	1	2641	Cluster2
TCGA-UY-A78O-01A	0	2312	Cluster2
TCGA-UY-A8OD-01A	0	3432	Cluster2
TCGA-UY-A9PA-01A	0	1072	Cluster2
TCGA-UY-A9PD-01A	0	542	Cluster2
TCGA-UY-A9PE-01A	0	189	Cluster2
TCGA-UY-A9PF-01A	0	117	Cluster2
TCGA-UY-A9PH-01A	0	1561	Cluster2
TCGA-XF-A8HB-01A	0	1370	Cluster2
TCGA-XF-A8HC-01A	1	200	Cluster2
TCGA-XF-A8HF-01A	1	2954	Cluster2
TCGA-XF-A8HG-01A	1	467	Cluster2
TCGA-XF-A8HH-01A	1	57	Cluster2
TCGA-XF-A8HI-01A	1	544	Cluster2
TCGA-XF-A9SH-01A	1	1971	Cluster2
TCGA-XF-A9SP-01A	1	454	Cluster2
TCGA-XF-A9ST-01A	1	128	Cluster2
TCGA-XF-A9SU-01A	1	182	Cluster2
TCGA-XF-A9SV-01A	1	388	Cluster2
TCGA-XF-A9T0-01A	0	799	Cluster2
TCGA-XF-AAMG-01A	0	3364	Cluster2
TCGA-XF-AAMH-01A	1	344	Cluster2
TCGA-XF-AAML-01A	1	232	Cluster2
TCGA-XF-AAMQ-01A	0	2177	Cluster2
TCGA-XF-AAMX-01A	1	206	Cluster2
TCGA-XF-AAMY-01A	0	3011	Cluster2
TCGA-XF-AAMZ-01A	1	1348	Cluster2
TCGA-XF-AAN1-01A	1	941	Cluster2
TCGA-YC-A89H-01A	0	573	Cluster2
TCGA-YF-AA3L-01A	0	364	Cluster2
TCGA-ZF-A9R0-01A	1	680	Cluster2
TCGA-ZF-A9R1-01A	0	773	Cluster2
TCGA-ZF-A9R2-01A	0	642	Cluster2
TCGA-ZF-A9R3-01A	1	949	Cluster2
TCGA-ZF-A9R4-01A	0	921	Cluster2
TCGA-ZF-A9R5-01A	0	1090	Cluster2
TCGA-ZF-A9R7-01A	0	665	Cluster2
TCGA-ZF-A9R9-01A	1	864	Cluster2
TCGA-ZF-A9RC-01A	0	2868	Cluster2
TCGA-ZF-A9RL-01A	0	2703	Cluster2
TCGA-ZF-A9RM-01A	0	1455	Cluster2
TCGA-ZF-AA4T-01A	1	599	Cluster2
TCGA-ZF-AA4U-01A	1	262	Cluster2
TCGA-ZF-AA4X-01A	0	2044	Cluster2
TCGA-ZF-AA51-01A	0	1714	Cluster2
TCGA-ZF-AA5N-01A	1	168	Cluster2
GSM340605	1	545	Cluster2
GSM340606	0	4109	Cluster2
GSM340607	0	4091	Cluster2
GSM340608	1	807	Cluster2
GSM340609	1	2612	Cluster2
GSM340610	1	459	Cluster2
GSM340611	1	556	Cluster2
GSM340614	0	3869	Cluster2
GSM340615	0	3751	Cluster2
GSM340616	0	3758	Cluster2
GSM340617	0	3918	Cluster2
GSM340618	1	31	Cluster2
GSM340619	0	3890	Cluster2
GSM340620	1	500	Cluster2
GSM340621	0	3829	Cluster2
GSM340622	0	3736	Cluster2
GSM340623	1	94	Cluster2
GSM340624	1	1978	Cluster2
GSM340625	1	97	Cluster2
GSM340626	0	3618	Cluster2
GSM340627	1	680	Cluster2
GSM340630	1	1989	Cluster2
GSM340631	0	3605	Cluster2
GSM340632	0	3618	Cluster2
GSM340633	1	437	Cluster2
GSM340634	0	3475	Cluster2
GSM340635	0	3198	Cluster2
GSM340636	0	3636	Cluster2
GSM340637	1	2940	Cluster2
GSM340638	1	2011	Cluster2
GSM340639	0	2992	Cluster2
GSM340640	1	1509	Cluster2
GSM340641	0	2947	Cluster2
GSM340642	0	3181	Cluster2
GSM340643	0	2859	Cluster2
GSM340644	1	2413	Cluster2
GSM340646	1	1553	Cluster2
GSM340647	0	2785	Cluster2
GSM340648	0	2722	Cluster2
GSM340649	0	2714	Cluster2
GSM340651	1	4049	Cluster2
GSM340652	1	1978	Cluster2
GSM340653	1	775	Cluster2
GSM340655	1	2563	Cluster2
GSM340656	1	95	Cluster2
GSM340657	0	2509	Cluster2
GSM340658	0	2509	Cluster2
GSM340659	1	2128	Cluster2
GSM340661	0	2406	Cluster2
GSM340662	0	2365	Cluster2
GSM340665	1	261	Cluster2
GSM340666	0	2260	Cluster2
GSM340667	0	2271	Cluster2
GSM340668	0	2254	Cluster2
GSM340669	0	2254	Cluster2
GSM340671	1	487	Cluster2
GSM340673	1	337	Cluster2
GSM340676	0	2012	Cluster2
GSM340679	0	1860	Cluster2
GSM340680	0	1840	Cluster2
GSM340681	0	1827	Cluster2
GSM340682	0	1806	Cluster2
GSM340683	0	1788	Cluster2
GSM340685	1	1796	Cluster2
GSM340686	0	1770	Cluster2
GSM340688	1	1385	Cluster2
GSM340689	0	1753	Cluster2
GSM340690	0	1742	Cluster2
GSM340691	0	1729	Cluster2
GSM340692	1	1089	Cluster2
GSM340694	0	1665	Cluster2
GSM340695	0	1589	Cluster2
GSM340698	1	856	Cluster2
GSM340700	1	462	Cluster2
GSM340703	0	1425	Cluster2
GSM340707	0	1305	Cluster2
GSM340708	0	1323	Cluster2
GSM340710	1	946	Cluster2
GSM340712	1	195	Cluster2
GSM340713	0	1232	Cluster2
GSM340716	1	959	Cluster2
GSM340717	0	1119	Cluster2
GSM340719	0	1097	Cluster2
GSM340721	1	118	Cluster2
GSM340723	1	453	Cluster2
GSM340726	0	1011	Cluster2
GSM340729	0	992	Cluster2
GSM340730	0	986	Cluster2
GSM340734	1	707	Cluster2
GSM340735	0	921	Cluster2
GSM340736	0	903	Cluster2
GSM340737	0	892	Cluster2
GSM340738	1	463	Cluster2
GSM340739	0	881	Cluster2
GSM340740	1	530	Cluster2
GSM340741	0	854	Cluster2
GSM340743	0	707	Cluster2
GSM340744	1	418	Cluster2
GSM340747	1	206	Cluster2
GSM340748	0	625	Cluster2
GSM340751	0	1736	Cluster2
GSM340752	0	637	Cluster2
GSM340753	0	637	Cluster2
GSM340754	0	614	Cluster2
GSM340755	0	612	Cluster2
GSM340756	0	570	Cluster2
GSM340757	0	2379	Cluster2
GSM340760	1	398	Cluster2
GSM340762	1	320	Cluster2
GSM340764	0	461	Cluster2
GSM340765	0	354	Cluster2
GSM340767	0	301	Cluster2
GSM340768	0	202	Cluster2
SAM0257bbbbd388	1	469	Cluster2
SAM065890737112	0	602	Cluster2
SAM0684af734db1	0	698	Cluster2
SAM07a93a28f801	0	385	Cluster2
SAM08cce2fa88f2	0	663	Cluster2
SAM110501d0eedb	1	128	Cluster2
SAM14938611a2d3	0	643	Cluster2
SAM14df63a65411	0	643	Cluster2
SAM18039827e1b9	1	44	Cluster2
SAM18a4dabbc557	1	494	Cluster2
SAM18bc1078bc15	1	207	Cluster2
SAM18be5b395318	1	270	Cluster2
SAM1bcc62d8290c	0	559	Cluster2
SAM1f3c93814cb9	1	43	Cluster2
SAM1fa6bcb7fc48	0	682	Cluster2
SAM203dcf14f927	0	581	Cluster2
SAM23095936e611	1	67	Cluster2
SAM26104d5adc89	1	162	Cluster2
SAM27299aed7681	0	566	Cluster2
SAM28e6031ac18b	1	277	Cluster2
SAM2bba8cb35e48	1	314	Cluster2
SAM2c9586161ce6	1	338	Cluster2
SAM2de7cffb5f72	1	55	Cluster2
SAM36851bc8b9ae	1	106	Cluster2
SAM3779e979db6b	1	39	Cluster2
SAM3894ac3956a5	0	63	Cluster2
SAM3ee5dcd894f0	1	261	Cluster2
SAM4305ab968b90	1	42	Cluster2
SAM4581bac493af	0	601	Cluster2
SAM4918c524b83a	0	19	Cluster2
SAM491e341d5a82	1	56	Cluster2
SAM548551ef782c	0	518	Cluster2
SAM54e58f1b0230	1	131	Cluster2
SAM563d6233dfa2	1	64	Cluster2
SAM568ce160abd9	1	385	Cluster2
SAM58e7832f4e7d	0	494	Cluster2
SAM5a2347c0498a	1	147	Cluster2
SAM5cc2d9036053	1	171	Cluster2
SAM5d1dfd5207f5	1	327	Cluster2
SAM5d989c86255e	1	103	Cluster2
SAM6083aac8db99	0	619	Cluster2
SAM6157c8f38b72	0	498	Cluster2
SAM61b9d4d84c64	0	642	Cluster2
SAM63b2189c36d7	1	119	Cluster2
SAM675a12a09c15	1	87	Cluster2
SAM6792d6e98068	1	180	Cluster2
SAM681e4bf7cf85	0	702	Cluster2
SAM6964a6d7b967	1	488	Cluster2
SAM7114d99032ec	1	325	Cluster2
SAM7746b76437e6	1	85	Cluster2
SAM7c67b05aa109	1	247	Cluster2
SAM7d7c54623618	0	637	Cluster2
SAM81b71522417a	1	64	Cluster2
SAM8533e5e261d6	1	384	Cluster2
SAM87a8e18eb45b	1	83	Cluster2
SAM8a1b0e02ee42	0	617	Cluster2
SAM8e43e9caf307	1	15	Cluster2
SAM8e469834acc1	1	111	Cluster2
SAM8f2275c36e8c	0	622	Cluster2
SAM91c47b054ffb	1	511	Cluster2
SAM9306c5c92444	0	463	Cluster2
SAM9539a4f19ebc	1	239	Cluster2
SAM961d04c42bd9	1	176	Cluster2
SAM9725303dce0c	0	267	Cluster2
SAM99b1f6a9534e	1	15	Cluster2
SAM9b9d48b0b02c	1	87	Cluster2
SAM9eebdef2858a	1	25	Cluster2
SAMa1871f491b02	1	52	Cluster2
SAMa1e62d323e1d	1	317	Cluster2
SAMa424c75831b4	1	106	Cluster2
SAMa535fcdf18a0	0	518	Cluster2
SAMabc151b01ea3	1	17	Cluster2
SAMae4da274eded	1	150	Cluster2
SAMb15ac6e4c4ef	0	600	Cluster2
SAMb470eb8f04be	0	602	Cluster2
SAMb8070b7937e7	1	631	Cluster2
SAMbc8dc3a7b54e	1	443	Cluster2
SAMbcbc7957c264	1	125	Cluster2
SAMbd8ee73983b8	1	26	Cluster2
SAMbda79f955628	0	619	Cluster2
SAMbf1a3ae828e6	0	622	Cluster2
SAMc0da5d48686d	1	285	Cluster2
SAMc57eadb2d82b	1	240	Cluster2
SAMc97f35a29d16	0	25	Cluster2
SAMcee0fa8c05b4	1	50	Cluster2
SAMd43f8933066b	0	600	Cluster2
SAMd5ab7fbfab4e	0	543	Cluster2
SAMd86389d0d768	1	66	Cluster2
SAMdab9ca8fb5de	0	6	Cluster2
SAMdad5c29dc105	1	73	Cluster2
SAMdb3f50c9129c	1	474	Cluster2
SAMe3d4266775a9	0	420	Cluster2
SAMe50d15fde368	0	567	Cluster2
SAMe712352fb82a	0	663	Cluster2
SAMe94c30c30616	1	461	Cluster2
SAMe97af0feefdf	1	333	Cluster2
SAMeaa477a5384b	0	648	Cluster2
SAMf275eb859a39	0	734	Cluster2
SAMf28c01545593	1	192	Cluster2
SAMf2aae1443f67	1	310	Cluster2
SAMfddc359e862b	1	58	Cluster2
SAMfed609955db9	0	617	Cluster2
SAMff41c4e8c08f	1	74	Cluster2
