# Supplementary material for: A Novel m7G-Related Genes-Based Signature with Prognostic Value and Predictive Ability to Select Patients Responsive to Personalized Treatment Strategies in Bladder Cancer
Source: Cancers (Basel). 2022 Oct 29;14(21):5346. doi: 10.3390/cancers14215346 (PMC9656096; doi:10.3390/cancers14215346)
Supplement: Supplementary file 1 [file cancers-14-05346-s001.zip › Table S7.xlsx]

## Sheet: 预后基因-批量相关性分析结果
genesymbol	correlation	pvalue	cor	category
ACKR3	-0.131316	0.000283533	neg	B
ACSF2	0.497969	7.17e-49	pos	A
ACSL5	0.450236	3.3e-39	pos	A
ACTA2	-0.390139	4.89e-29	neg	B
ACTG2	-0.367325	1.09e-25	neg	B
ACTN1	-0.614374	4.6e-80	neg	B
ADA	-0.50937	2.05e-51	neg	B
ADAM12	-0.485796	2.93e-46	neg	B
ADAMTS2	-0.561142	2.93e-64	neg	B
ADAMTS4	-0.487702	1.16e-46	neg	B
ADCY7	-0.583185	1.89e-70	neg	B
ADM	-0.300752	2.36e-17	neg	B
AEBP1	-0.545249	4.47e-60	neg	B
AHNAK2	-0.651459	5.41e-93	neg	B
ALDH1A1	-0.3166	3.73e-19	neg	B
ANGPTL2	-0.460837	3.18e-41	neg	B
ANLN	-0.273947	1.5e-14	neg	B
ANXA1	-0.502175	8.48e-50	neg	B
ANXA2	-0.537123	5.06e-58	neg	B
ANXA5	-0.610727	6.97e-79	neg	B
AREG	-0.370344	4.06e-26	neg	B
ARHGEF4	-0.339731	5.5e-22	neg	B
ARL4C	-0.507032	6.95e-51	neg	B
ARSI	-0.600578	1.11e-75	neg	B
ASPM	-0.222793	5.3e-10	neg	B
ASPN	-0.458114	1.06e-40	neg	B
ATF7IP2	0.482581	1.38e-45	pos	A
ATOH8	0.402273	6.29e-31	pos	A
ATP1A4	0.479226	6.8e-45	pos	A
ATP8B2	-0.460984	2.98e-41	neg	B
AURKA	-0.19576	5.31e-08	neg	B
B3GNT3	0.427036	4.9e-35	pos	A
BAMBI	0.510212	1.32e-51	pos	A
BARX2	-0.397631	3.4e-30	neg	B
BCAS1	0.614966	2.95e-80	pos	A
BCAT1	-0.43807	5.57e-37	neg	B
BEND5	0.453983	6.51e-40	pos	A
BGN	-0.390249	4.7e-29	neg	B
BHLHE41	0.427945	3.41e-35	pos	A
BHMT	0.572914	1.66e-67	pos	A
BNC1	-0.512562	3.83e-52	neg	B
BTBD16	0.547331	1.3e-60	pos	A
BUB1B	-0.113925	0.00165647	neg	B
C4orf19	0.388591	8.41e-29	pos	A
CACNA1D	0.51221	4.61e-52	pos	A
CALD1	-0.565157	2.37e-65	neg	B
CALML3	-0.183576	3.47e-07	neg	B
CAPN5	0.60745	7.76e-78	pos	A
CAPN8	0.307768	3.88e-18	pos	A
CAPS	0.532505	7.03e-57	pos	A
CASQ1	0.491814	1.54e-47	pos	A
CAV1	-0.580905	8.68e-70	neg	B
CAV2	-0.507297	6.06e-51	neg	B
CCDC8	-0.42166	4.09e-34	neg	B
CCDC80	-0.548696	5.78e-61	neg	B
CCL4	-0.532235	8.19e-57	neg	B
CCNB1	-0.19315	8.02e-08	neg	B
CD109	-0.67835	1.44e-103	neg	B
CD2	-0.431744	7.4e-36	neg	B
CD248	-0.438538	4.59e-37	neg	B
CD27	-0.38928	6.61e-29	neg	B
CD3E	-0.426787	5.41e-35	neg	B
CD74	-0.418984	1.16e-33	neg	B
CD8A	-0.412715	1.28e-32	neg	B
CD93	-0.350281	2.33e-23	neg	B
CDA	-0.473207	1.14e-43	neg	B
CDC20	-0.221112	7.18e-10	neg	B
CDC25B	-0.559855	6.52e-64	neg	B
CDCA5	-0.240497	1.84e-11	neg	B
CDH11	-0.438645	4.39e-37	neg	B
CDH23	0.499005	4.25e-49	pos	A
CDK6	-0.562518	1.24e-64	neg	B
CDKN3	-0.339743	5.48e-22	neg	B
CHST15	-0.697816	5.88e-112	neg	B
CILP	-0.403348	4.24e-31	neg	B
CLCF1	-0.517057	3.49e-53	neg	B
CLDN5	-0.195018	5.97e-08	neg	B
CLIC4	-0.572764	1.83e-67	neg	B
CLIC6	0.138525	0.000127592	pos	A
CLMP	-0.518856	1.33e-53	neg	B
CNTN1	-0.379707	1.79e-27	neg	B
COL11A1	-0.424095	1.57e-34	neg	B
COL14A1	-0.270462	3.31e-14	neg	B
COL15A1	-0.462005	1.89e-41	neg	B
COL16A1	-0.549998	2.65e-61	neg	B
COL18A1	-0.465136	4.62e-42	neg	B
COL1A1	-0.519185	1.11e-53	neg	B
COL1A2	-0.497794	7.83e-49	neg	B
COL3A1	-0.485757	2.98e-46	neg	B
COL4A2	-0.368747	6.84e-26	neg	B
COL5A1	-0.546037	2.81e-60	neg	B
COL5A2	-0.552704	5.2e-62	neg	B
COL6A1	-0.570205	9.51e-67	neg	B
COL6A2	-0.59916	3.05e-75	neg	B
COL6A3	-0.514407	1.44e-52	neg	B
COL7A1	-0.347022	6.27e-23	neg	B
COL8A1	-0.343418	1.85e-22	neg	B
COMP	-0.324495	4.29e-20	neg	B
COPZ2	-0.615086	2.7e-80	neg	B
CPA4	-0.483561	8.6e-46	neg	B
CPE	-0.293319	1.52e-16	neg	B
CPXM1	-0.487118	1.54e-46	neg	B
CRISPLD2	-0.438308	5.05e-37	neg	B
CROT	0.441793	1.19e-37	pos	A
CRTAC1	0.454892	4.38e-40	pos	A
CRYAB	-0.489797	4.17e-47	neg	B
CSTA	-0.178812	7e-07	neg	B
CTHRC1	-0.602506	2.8e-76	neg	B
CTSE	0.395626	6.98e-30	pos	A
CTSH	0.435464	1.63e-36	pos	A
CTSV	-0.30727	4.42e-18	neg	B
CXCL12	-0.42369	1.84e-34	neg	B
CXCL8	-0.45046	3e-39	neg	B
CXCL9	-0.464319	6.68e-42	neg	B
CYBRD1	-0.520094	6.78e-54	neg	B
CYFIP2	0.255913	7.89e-13	pos	A
CYP4F12	0.54198	3.04e-59	pos	A
CYP4F8	0.430137	1.42e-35	pos	A
DACT1	-0.450463	2.99e-39	neg	B
DAPK1	0.490749	2.61e-47	pos	A
DCN	-0.458519	8.9e-41	neg	B
DEGS1	-0.624358	2.26e-83	neg	B
DEGS2	0.515365	8.64e-53	pos	A
DGAT2	0.504269	2.9e-50	pos	A
DHRS2	0.631321	9.4e-86	pos	A
DLGAP5	-0.26852	5.11e-14	neg	B
DPYSL2	-0.45214	1.45e-39	neg	B
DPYSL3	-0.485981	2.68e-46	neg	B
DSC2	-0.42365	1.87e-34	neg	B
DSC3	-0.319456	1.72e-19	neg	B
DSG3	-0.49821	6.35e-49	neg	B
DSP	-0.336058	1.61e-21	neg	B
DUSP1	-0.410185	3.33e-32	neg	B
DUSP2	0.289962	3.45e-16	pos	A
DUSP7	-0.396268	5.55e-30	neg	B
ECM1	-0.540462	7.37e-59	neg	B
EDNRA	-0.468648	9.35e-43	neg	B
EFEMP1	-0.568045	3.79e-66	neg	B
EGFR	-0.330213	8.6e-21	neg	B
EGR1	-0.377447	3.84e-27	neg	B
EGR2	-0.470993	3.19e-43	neg	B
EGR3	-0.354611	6.14e-24	neg	B
EHD2	-0.53666	6.61e-58	neg	B
ELN	-0.149014	3.72e-05	neg	B
EMP1	-0.520978	4.2e-54	neg	B
EMP3	-0.657505	2.82e-95	neg	B
EMX2	0.474206	7.19e-44	pos	A
ENTPD3	0.470763	3.54e-43	pos	A
EREG	-0.335439	1.92e-21	neg	B
ERN2	0.307649	4e-18	pos	A
EVA1A	-0.470076	4.86e-43	neg	B
F3	-0.572827	1.75e-67	neg	B
FABP6	0.443696	5.34e-38	pos	A
FAM174B	0.610073	1.13e-78	pos	A
FAM3B	0.609123	2.27e-78	pos	A
FAM3D	0.470474	4.05e-43	pos	A
FAP	-0.588866	4.01e-72	neg	B
FBN1	-0.521615	2.97e-54	neg	B
FBP1	0.588675	4.57e-72	pos	A
FERMT2	-0.462834	1.3e-41	neg	B
FGF7	-0.402771	5.24e-31	neg	B
FGFBP1	-0.45711	1.66e-40	neg	B
FIBIN	-0.46305	1.18e-41	neg	B
FILIP1L	-0.498055	6.86e-49	neg	B
FKBP10	-0.425311	9.72e-35	neg	B
FLNA	-0.62388	3.27e-83	neg	B
FLNC	-0.476968	1.97e-44	neg	B
FN1	-0.532869	5.72e-57	neg	B
FNDC1	-0.473186	1.16e-43	neg	B
FOSB	-0.114095	0.00162998	neg	B
FOSL1	-0.389925	5.27e-29	neg	B
FPR1	-0.605921	2.37e-77	neg	B
FSCN1	-0.376878	4.64e-27	neg	B
FSTL1	-0.460097	4.42e-41	neg	B
FSTL3	-0.447486	1.07e-38	neg	B
GADD45B	-0.34429	1.42e-22	neg	B
GAL	-0.310779	1.76e-18	neg	B
GAS6	-0.505834	1.29e-50	neg	B
GAS7	-0.483025	1.11e-45	neg	B
GATA2	0.465719	3.55e-42	pos	A
GATA3	0.590485	1.32e-72	pos	A
GBP6	-0.27803	5.88e-15	neg	B
GEM	-0.448231	7.79e-39	neg	B
GFPT2	-0.656728	5.58e-95	neg	B
GGT6	0.569444	1.55e-66	pos	A
GJB2	-0.291729	2.24e-16	neg	B
GNLY	-0.522842	1.52e-54	neg	B
GOLT1A	0.544188	8.36e-60	pos	A
GPR160	0.498217	6.33e-49	pos	A
GPR171	-0.389397	6.34e-29	neg	B
GPR68	-0.612559	1.79e-79	neg	B
GPRC5C	0.472456	1.62e-43	pos	A
GPX8	-0.589621	2.39e-72	neg	B
GREM1	-0.510424	1.18e-51	neg	B
GSDMC	-0.455417	3.48e-40	neg	B
GZMA	-0.48862	7.42e-47	neg	B
HBEGF	-0.450863	2.52e-39	neg	B
HES2	-0.386382	1.81e-28	neg	B
HID1	0.629346	4.51e-85	pos	A
HMGA2	-0.414	7.87e-33	neg	B
HMGCS2	0.609115	2.29e-78	pos	A
HOXB3	0.412826	1.23e-32	pos	A
HOXB5	0.358653	1.74e-24	pos	A
HOXB8	0.333557	3.31e-21	pos	A
HOXD11	-0.404244	3.05e-31	neg	B
HSD17B2	0.465968	3.17e-42	pos	A
HSPB6	-0.307105	4.61e-18	neg	B
HTRA1	-0.4823	1.57e-45	neg	B
HTRA3	-0.560196	5.28e-64	neg	B
ICA1	0.514236	1.58e-52	pos	A
ID2	0.244926	7.62e-12	pos	A
ID4	0.282131	2.25e-15	pos	A
IER3	-0.473471	1.01e-43	neg	B
IFITM2	-0.522632	1.7e-54	neg	B
IGF2BP2	-0.517346	2.99e-53	neg	B
IL1RAP	-0.483134	1.06e-45	neg	B
IL20RB	-0.448057	8.4e-39	neg	B
INHBA	-0.508219	3.75e-51	neg	B
ISLR	-0.506575	8.81e-51	neg	B
ITGA5	-0.645996	5.64e-91	neg	B
ITPRIP	-0.603684	1.2e-76	neg	B
JAM3	-0.346987	6.33e-23	neg	B
JUN	-0.362641	4.91e-25	neg	B
KCNQ1	0.351739	1.49e-23	pos	A
KIF2C	-0.19407	6.94e-08	neg	B
KLHDC7A	0.547416	1.24e-60	pos	A
KLK10	-0.393665	1.41e-29	neg	B
KLK5	-0.361057	8.13e-25	neg	B
KLK6	-0.362754	4.73e-25	neg	B
KLK7	-0.391979	2.56e-29	neg	B
KLK8	-0.344675	1.27e-22	neg	B
KRT1	-0.266736	7.59e-14	neg	B
KRT14	-0.411504	2.03e-32	neg	B
KRT16	-0.382672	6.52e-28	neg	B
KRT4	-0.219701	9.26e-10	neg	B
KRT5	-0.406199	1.48e-31	neg	B
KRT6B	-0.528405	7.02e-56	neg	B
KRT6C	-0.438314	5.04e-37	neg	B
KRT7	0.452595	1.19e-39	pos	A
KRT81	-0.407826	8.07e-32	neg	B
KRTAP5-9	0.488098	9.57e-47	pos	A
KRTDAP	-0.247318	4.69e-12	neg	B
LAMA2	-0.299051	3.63e-17	neg	B
LAMA4	-0.490136	3.53e-47	neg	B
LDLR	-0.437878	6.03e-37	neg	B
LGALS1	-0.568015	3.86e-66	neg	B
LGALS4	0.25766	5.45e-13	pos	A
LIMCH1	0.413103	1.11e-32	pos	A
LMCD1	-0.462436	1.56e-41	neg	B
LOX	-0.584775	6.47e-71	neg	B
LRIG1	-0.566249	1.19e-65	neg	B
LRP8	-0.31849	2.23e-19	neg	B
LRRC32	-0.398251	2.72e-30	neg	B
LUM	-0.42901	2.23e-35	neg	B
LYPD6B	0.48551	3.36e-46	pos	A
LYVE1	-0.345533	9.81e-23	neg	B
MALL	-0.284119	1.41e-15	neg	B
MAOA	0.459985	4.64e-41	pos	A
MAP1A	-0.416966	2.53e-33	neg	B
MAP1B	-0.441426	1.38e-37	neg	B
ME1	-0.479764	5.27e-45	neg	B
MECOM	0.469086	7.65e-43	pos	A
MFAP5	-0.482172	1.67e-45	neg	B
MFGE8	-0.529882	3.08e-56	neg	B
MMP11	-0.449945	3.74e-39	neg	B
MMP9	-0.550944	1.5e-61	neg	B
MSRB3	-0.49041	3.08e-47	neg	B
MT1A	-0.437356	7.49e-37	neg	B
MT1G	-0.471918	2.08e-43	neg	B
MT1X	-0.64533	9.88e-91	neg	B
MT2A	-0.69796	5.06e-112	neg	B
MTHFD2	-0.441204	1.52e-37	neg	B
MXRA8	-0.451305	2.08e-39	neg	B
MYADM	-0.512628	3.7e-52	neg	B
MYC	-0.454992	4.19e-40	neg	B
MYH11	-0.234906	5.48e-11	neg	B
MYLIP	0.458512	8.92e-41	pos	A
MYLK	-0.384249	3.79e-28	neg	B
MYO1B	-0.472866	1.34e-43	neg	B
NDRG1	-0.12412	0.000604931	neg	B
NEK6	-0.616995	6.39e-81	neg	B
NFIL3	-0.578971	3.14e-69	neg	B
NID1	-0.378974	2.29e-27	neg	B
NID2	-0.427923	3.44e-35	neg	B
NMU	-0.260084	3.24e-13	neg	B
NNMT	-0.609552	1.66e-78	neg	B
NOD2	-0.597651	8.88e-75	neg	B
NPTXR	0.302016	1.71e-17	pos	A
NR2F1	-0.0993792	0.00610705	neg	B
NR4A1	-0.224843	3.64e-10	neg	B
NRP2	-0.576946	1.19e-68	neg	B
OGN	-0.274614	1.29e-14	neg	B
OLFML2B	-0.493976	5.29e-48	neg	B
OSMR	-0.668378	1.62e-99	neg	B
OVGP1	0.483192	1.03e-45	pos	A
PALLD	-0.593941	1.2e-73	neg	B
PALM	-0.166645	3.86e-06	neg	B
PALM3	0.418789	1.25e-33	pos	A
PAQR8	0.409271	4.7e-32	pos	A
PARVB	-0.565072	2.5e-65	neg	B
PCOLCE	-0.424147	1.54e-34	neg	B
PCOLCE2	-0.422879	2.54e-34	neg	B
PDE7B	0.206161	9.7e-09	pos	A
PDGFC	-0.531504	1.24e-56	neg	B
PDGFRB	-0.48627	2.33e-46	neg	B
PDLIM4	-0.530519	2.15e-56	neg	B
PDLIM7	-0.580044	1.54e-69	neg	B
PERP	-0.10053	0.00553925	neg	B
PGLYRP3	-0.344194	1.47e-22	neg	B
PHGR1	0.462453	1.54e-41	pos	A
PHLDA1	-0.396663	4.81e-30	neg	B
PI3	-0.474243	7.07e-44	neg	B
PIK3C2B	0.574673	5.28e-68	pos	A
PITX1	-0.367518	1.02e-25	neg	B
PLA2G2F	0.559136	1.02e-63	pos	A
PLAC9	-0.147692	4.36e-05	neg	B
PLAU	-0.500025	2.54e-49	neg	B
PLAUR	-0.658651	1.03e-95	neg	B
PLEKHA6	0.535673	1.16e-57	pos	A
PLIN4	0.330827	7.23e-21	pos	A
PLK2	-0.489972	3.83e-47	neg	B
PMEPA1	-0.546108	2.69e-60	neg	B
POSTN	-0.525087	4.42e-55	neg	B
POU5F1	0.424657	1.26e-34	pos	A
PPFIBP2	0.666496	9.05e-99	pos	A
PPP1R3C	0.496956	1.19e-48	pos	A
PPP1R9A	0.394049	1.23e-29	pos	A
PRC1	-0.202529	1.77e-08	neg	B
PRKCB	-0.279159	4.52e-15	neg	B
PRNP	-0.471501	2.52e-43	neg	B
PROS1	-0.393355	1.57e-29	neg	B
PRR15	0.397549	3.5e-30	pos	A
PRRX1	-0.602983	1.98e-76	neg	B
PTCHD1	0.330166	8.72e-21	pos	A
PTGIS	-0.337038	1.21e-21	neg	B
PTHLH	-0.48979	4.18e-47	neg	B
PTPRM	0.406048	1.56e-31	pos	A
PTPRR	0.428958	2.27e-35	pos	A
PTPRZ1	-0.372684	1.88e-26	neg	B
PVALB	0.33987	5.28e-22	pos	A
RAB3IL1	-0.600491	1.18e-75	neg	B
RBP1	-0.506464	9.33e-51	neg	B
RBPMS	0.193175	7.99e-08	pos	A
RCAN1	-0.39303	1.76e-29	neg	B
RCN3	-0.480531	3.66e-45	neg	B
RGS2	-0.503361	4.62e-50	neg	B
RGS20	-0.48954	4.73e-47	neg	B
RHBG	0.538825	1.9e-58	pos	A
RHCG	-0.369431	5.47e-26	neg	B
S100A10	-0.542025	2.97e-59	neg	B
S100A12	-0.248619	3.6e-12	neg	B
S100A16	-0.330302	8.39e-21	neg	B
S100A7	-0.373218	1.57e-26	neg	B
S100A8	-0.48203	1.79e-45	neg	B
S100A9	-0.354342	6.68e-24	neg	B
SBSN	-0.288474	4.95e-16	neg	B
SCARF2	-0.463767	8.56e-42	neg	B
SCEL	-0.310657	1.82e-18	neg	B
SCNN1G	0.638097	3.96e-88	pos	A
SERPINB13	-0.427943	3.41e-35	neg	B
SERPINB2	-0.421973	3.62e-34	neg	B
SERPINB3	-0.404666	2.61e-31	neg	B
SERPINB4	-0.426153	6.96e-35	neg	B
SERPINB7	-0.401516	8.3e-31	neg	B
SERPINE1	-0.434553	2.36e-36	neg	B
SERPINE2	-0.489552	4.7e-47	neg	B
SERPINF1	-0.407611	8.75e-32	neg	B
SFN	-0.28465	1.24e-15	neg	B
SFRP1	-0.341452	3.31e-22	neg	B
SFRP2	-0.524854	5.03e-55	neg	B
SHH	0.348367	4.17e-23	pos	A
SIDT1	0.399005	2.07e-30	pos	A
SIGLEC15	0.470533	3.94e-43	pos	A
SLC16A1	-0.56923	1.78e-66	neg	B
SLC29A3	0.530022	2.85e-56	pos	A
SLC2A1	-0.0858808	0.0178822	neg	B
SLC2A3	-0.528874	5.41e-56	neg	B
SLC44A4	0.390033	5.07e-29	pos	A
SLC7A5	-0.316538	3.79e-19	neg	B
SLCO1B3	-0.369863	4.75e-26	neg	B
SLIT2	-0.411442	2.08e-32	neg	B
SLITRK6	0.432587	5.26e-36	pos	A
SNAI1	-0.515228	9.3e-53	neg	B
SNAI2	-0.454864	4.44e-40	neg	B
SNCG	0.525685	3.18e-55	pos	A
SNX31	0.624027	2.92e-83	pos	A
SOCS3	-0.528947	5.19e-56	neg	B
SOD3	-0.340092	4.95e-22	neg	B
SORL1	0.541507	4.01e-59	pos	A
SOX7	-0.450266	3.26e-39	neg	B
SOX9	-0.444429	3.92e-38	neg	B
SPARC	-0.43721	7.95e-37	neg	B
SPHK1	-0.659585	4.5e-96	neg	B
SPINK1	0.630849	1.37e-85	pos	A
SPINK5	-0.0799435	0.027539	neg	B
SPON1	-0.323177	6.18e-20	neg	B
SPON2	-0.507379	5.8e-51	neg	B
SPP1	-0.472775	1.4e-43	neg	B
SPRR1B	-0.302922	1.36e-17	neg	B
SPRR2A	-0.366877	1.26e-25	neg	B
SPRR2E	-0.351707	1.51e-23	neg	B
SPRR2G	-0.267996	5.74e-14	neg	B
SRPX	-0.500228	2.29e-49	neg	B
SSC5D	-0.460865	3.14e-41	neg	B
ST3GAL4	0.492691	1e-47	pos	A
ST3GAL5	0.491445	1.85e-47	pos	A
STC1	-0.348098	4.53e-23	neg	B
SULF2	-0.631162	1.07e-85	neg	B
SULT2B1	-0.293449	1.47e-16	neg	B
TAGLN	-0.452064	1.5e-39	neg	B
TBX2	0.576102	2.07e-68	pos	A
TBX3	0.61484	3.25e-80	pos	A
TEAD4	-0.599339	2.69e-75	neg	B
TESC	0.503217	4.98e-50	pos	A
TFAP2A	-0.224875	3.62e-10	neg	B
TGFB1I1	-0.473369	1.06e-43	neg	B
TGFB3	-0.568628	2.61e-66	neg	B
TGFBI	-0.634205	9.31e-87	neg	B
TGFBR3	0.371219	3.04e-26	pos	A
TGM1	-0.389663	5.78e-29	neg	B
THBD	-0.246168	5.93e-12	neg	B
THBS1	-0.483231	1.01e-45	neg	B
THY1	-0.429881	1.57e-35	neg	B
TIMP2	-0.533326	4.42e-57	neg	B
TJP3	0.48209	1.74e-45	pos	A
TLE2	0.513354	2.52e-52	pos	A
TM4SF1	-0.463319	1.05e-41	neg	B
TMC4	0.548898	5.13e-61	pos	A
TMEM158	-0.531119	1.54e-56	neg	B
TMEM45A	-0.54407	8.96e-60	neg	B
TNC	-0.668387	1.61e-99	neg	B
TNFAIP2	0.395557	7.16e-30	pos	A
TNFAIP6	-0.634899	5.32e-87	neg	B
TNFAIP8L3	-0.534977	1.73e-57	neg	B
TNNT1	-0.219866	8.99e-10	neg	B
TOX3	0.643225	5.75e-90	pos	A
TPM1	-0.456826	1.88e-40	neg	B
TPM2	-0.472182	1.84e-43	neg	B
TPX2	-0.221779	6.37e-10	neg	B
TREM1	-0.526976	1.56e-55	neg	B
TSPAN8	0.272144	2.26e-14	pos	A
TUBB6	-0.659834	3.61e-96	neg	B
TWIST1	-0.530348	2.37e-56	neg	B
UCHL1	-0.45508	4.04e-40	neg	B
UCP2	0.322211	8.07e-20	pos	A
VCAN	-0.453237	9.01e-40	neg	B
VIM	-0.551361	1.17e-61	neg	B
VIPR1	0.587428	1.07e-71	pos	A
VSNL1	-0.516172	5.61e-53	neg	B
ZBED2	-0.477634	1.44e-44	neg	B
ZFP36	-0.236727	3.86e-11	neg	B
ZNF439	0.495979	1.95e-48	pos	A
ZNF552	0.556485	5.21e-63	pos	A
ZNF737	0.449728	4.1e-39	pos	A
