# Supplementary material for: A Novel m7G-Related Genes-Based Signature with Prognostic Value and Predictive Ability to Select Patients Responsive to Personalized Treatment Strategies in Bladder Cancer
Source: Cancers (Basel). 2022 Oct 29;14(21):5346. doi: 10.3390/cancers14215346 (PMC9656096; doi:10.3390/cancers14215346)
Supplement: Supplementary file 1 [file cancers-14-05346-s001.zip › Table S8.xlsx]

## Sheet: A-LASSO结果
genesymbol	coef	category
ACSF2	0	A
ACSL5	0	A
ATF7IP2	-0.00104144	A
ATOH8	0	A
ATP1A4	0	A
B3GNT3	0	A
BAMBI	0	A
BCAS1	0	A
BEND5	0	A
BHLHE41	-0.0112138	A
BHMT	0	A
BTBD16	0	A
C4orf19	0	A
CACNA1D	0	A
CAPN5	0	A
CAPN8	0	A
CAPS	0	A
CASQ1	0	A
CDH23	0	A
CLIC6	-0.007835	A
CROT	0	A
CRTAC1	0	A
CTSE	-0.0464642	A
CTSH	0	A
CYFIP2	-0.0461014	A
CYP4F12	0	A
CYP4F8	0	A
DAPK1	0	A
DEGS2	0	A
DGAT2	0	A
DHRS2	0	A
DUSP2	0	A
EMX2	-0.012313	A
ENTPD3	0	A
ERN2	0	A
FABP6	0	A
FAM174B	0	A
FAM3B	0	A
FAM3D	0	A
FBP1	0	A
GATA2	0	A
GATA3	0	A
GGT6	0	A
GOLT1A	0	A
GPR160	0	A
GPRC5C	0	A
HID1	0	A
HMGCS2	0	A
HOXB3	0	A
HOXB5	-0.0191263	A
HOXB8	0	A
HSD17B2	0	A
ICA1	0	A
ID2	-0.0147459	A
ID4	0	A
KCNQ1	0	A
KLHDC7A	0	A
KRT7	0	A
KRTAP5-9	0	A
LGALS4	0	A
LIMCH1	0	A
LYPD6B	0	A
MAOA	0	A
MECOM	0	A
MYLIP	0	A
NPTXR	0	A
OVGP1	0	A
PALM3	0	A
PAQR8	0	A
PDE7B	0	A
PHGR1	0	A
PIK3C2B	0	A
PLA2G2F	0	A
PLEKHA6	0	A
PLIN4	0	A
POU5F1	0	A
PPFIBP2	0	A
PPP1R3C	0	A
PPP1R9A	0	A
PRR15	0	A
PTCHD1	0	A
PTPRM	0	A
PTPRR	-0.0163827	A
PVALB	0	A
RBPMS	0	A
RHBG	0	A
SCNN1G	0	A
SHH	0	A
SIDT1	0	A
SIGLEC15	0	A
SLC29A3	0	A
SLC44A4	0	A
SLITRK6	0	A
SNCG	0	A
SNX31	0	A
SORL1	0	A
SPINK1	0	A
ST3GAL4	0	A
ST3GAL5	0	A
TBX2	0	A
TBX3	0	A
TESC	0	A
TGFBR3	0	A
TJP3	0	A
TLE2	0	A
TMC4	0	A
TNFAIP2	0	A
TOX3	0	A
TSPAN8	-0.00894724	A
UCP2	-0.0171549	A
VIPR1	0	A
ZNF439	0	A
ZNF552	0	A
ZNF737	0	A
ACKR3	0	B
ACTA2	0	B
ACTG2	0	B
ACTN1	0	B
ADA	0	B
ADAM12	0	B
ADAMTS2	0	B
ADAMTS4	0	B
ADCY7	0.00774578	B
ADM	0	B
AEBP1	0	B
AHNAK2	0	B
ALDH1A1	0	B
ANGPTL2	0	B
ANLN	0	B
ANXA1	0	B
ANXA2	0	B
ANXA5	0	B
AREG	0	B
ARHGEF4	0	B
ARL4C	0	B
ARSI	0	B
ASPM	0	B
ASPN	0	B
ATP8B2	0	B
AURKA	0	B
BARX2	0	B
BCAT1	0	B
BGN	0	B
BNC1	0	B
BUB1B	0	B
CALD1	0	B
CALML3	0	B
CAV1	0	B
CAV2	0	B
CCDC8	0	B
CCDC80	0	B
CCL4	-0.0542717	B
CCNB1	0	B
CD109	0.0409022	B
CD2	0	B
CD248	0	B
CD27	0	B
CD3E	-0.0337192	B
CD74	0	B
CD8A	0	B
CD93	0	B
CDA	0	B
CDC20	0	B
CDC25B	0	B
CDCA5	0	B
CDH11	0	B
CDK6	0	B
CDKN3	0	B
CHST15	0	B
CILP	0	B
CLCF1	0	B
CLDN5	0.0142637	B
CLIC4	0	B
CLMP	0	B
CNTN1	0	B
COL11A1	0	B
COL14A1	0	B
COL15A1	0	B
COL16A1	0	B
COL18A1	0.00820328	B
COL1A1	0	B
COL1A2	0	B
COL3A1	0	B
COL4A2	0	B
COL5A1	0	B
COL5A2	0	B
COL6A1	0	B
COL6A2	0	B
COL6A3	0	B
COL7A1	0	B
COL8A1	0	B
COMP	0.0116361	B
COPZ2	0	B
CPA4	0	B
CPE	0	B
CPXM1	0	B
CRISPLD2	0	B
CRYAB	0	B
CSTA	0	B
CTHRC1	0	B
CTSV	0	B
CXCL12	0	B
CXCL8	0	B
CXCL9	-0.00998239	B
CYBRD1	0	B
DACT1	0	B
DCN	0	B
DEGS1	0	B
DLGAP5	0	B
DPYSL2	0	B
DPYSL3	0	B
DSC2	0	B
DSC3	0	B
DSG3	0	B
DSP	0	B
DUSP1	0	B
DUSP7	0	B
ECM1	0	B
EDNRA	0	B
EFEMP1	0	B
EGFR	0.0586397	B
EGR1	0	B
EGR2	0	B
EGR3	0	B
EHD2	0	B
ELN	0	B
EMP1	0.0231625	B
EMP3	0	B
EREG	0	B
EVA1A	0	B
F3	0	B
FAP	0	B
FBN1	0	B
FERMT2	0	B
FGF7	0	B
FGFBP1	0	B
FIBIN	0	B
FILIP1L	0	B
FKBP10	0.0100213	B
FLNA	0	B
FLNC	0	B
FN1	0	B
FNDC1	0	B
FOSB	0	B
FOSL1	0.0201019	B
FPR1	0	B
FSCN1	0	B
FSTL1	0	B
FSTL3	0	B
GADD45B	0	B
GAL	0	B
GAS6	0	B
GAS7	0	B
GBP6	0	B
GEM	0	B
GFPT2	0	B
GJB2	0	B
GNLY	-0.0936533	B
GPR171	0	B
GPR68	0	B
GPX8	0	B
GREM1	0	B
GSDMC	0	B
GZMA	0	B
HBEGF	0	B
HES2	0	B
HMGA2	0	B
HOXD11	0	B
HSPB6	0	B
HTRA1	0	B
HTRA3	0	B
IER3	0	B
IFITM2	0	B
IGF2BP2	0	B
IL1RAP	0	B
IL20RB	0	B
INHBA	0	B
ISLR	0	B
ITGA5	0	B
ITPRIP	0	B
JAM3	0	B
JUN	0	B
KIF2C	0	B
KLK10	0	B
KLK5	0	B
KLK6	0	B
KLK7	0	B
KLK8	0	B
KRT1	0	B
KRT14	0	B
KRT16	0	B
KRT4	0.0102297	B
KRT5	0	B
KRT6B	0	B
KRT6C	0	B
KRT81	0	B
KRTDAP	0	B
LAMA2	0	B
LAMA4	0	B
LDLR	0.0421318	B
LGALS1	0	B
LMCD1	0	B
LOX	0	B
LRIG1	0	B
LRP8	0.0156237	B
LRRC32	0	B
LUM	0	B
LYVE1	0	B
MALL	0	B
MAP1A	0	B
MAP1B	0	B
ME1	0	B
MFAP5	0.0248819	B
MFGE8	0	B
MMP11	0	B
MMP9	0	B
MSRB3	0	B
MT1A	0.0294993	B
MT1G	0	B
MT1X	0	B
MT2A	0	B
MTHFD2	0	B
MXRA8	0	B
MYADM	0	B
MYC	0.000388006	B
MYH11	0	B
MYLK	0	B
MYO1B	0	B
NDRG1	0	B
NEK6	0	B
NFIL3	0	B
NID1	0	B
NID2	0	B
NMU	0	B
NNMT	0	B
NOD2	0	B
NR2F1	0.00985134	B
NR4A1	0	B
NRP2	0	B
OGN	0	B
OLFML2B	0	B
OSMR	0	B
PALLD	0	B
PALM	0	B
PARVB	0	B
PCOLCE	0	B
PCOLCE2	0	B
PDGFC	0	B
PDGFRB	0	B
PDLIM4	0	B
PDLIM7	0	B
PERP	0	B
PGLYRP3	0	B
PHLDA1	0	B
PI3	0	B
PITX1	0	B
PLAC9	0	B
PLAU	0	B
PLAUR	0	B
PLK2	0	B
PMEPA1	0	B
POSTN	0	B
PRC1	0	B
PRKCB	-0.0395586	B
PRNP	0	B
PROS1	0	B
PRRX1	0	B
PTGIS	0	B
PTHLH	0	B
PTPRZ1	0	B
RAB3IL1	0	B
RBP1	0	B
RCAN1	0	B
RCN3	0.031628	B
RGS2	0	B
RGS20	0	B
RHCG	0	B
S100A10	0	B
S100A12	0	B
S100A16	0	B
S100A7	0	B
S100A8	0	B
S100A9	0	B
SBSN	0	B
SCARF2	0	B
SCEL	0.030596	B
SERPINB13	0	B
SERPINB2	0.0292304	B
SERPINB3	0	B
SERPINB4	0	B
SERPINB7	0	B
SERPINE1	0	B
SERPINE2	0.0209469	B
SERPINF1	0	B
SFN	0	B
SFRP1	0	B
SFRP2	0	B
SLC16A1	0	B
SLC2A1	0	B
SLC2A3	0	B
SLC7A5	0	B
SLCO1B3	0	B
SLIT2	0	B
SNAI1	0	B
SNAI2	0	B
SOCS3	0	B
SOD3	0	B
SOX7	0	B
SOX9	0	B
SPARC	0	B
SPHK1	0	B
SPINK5	0.0288043	B
SPON1	0	B
SPON2	0	B
SPP1	0	B
SPRR1B	0	B
SPRR2A	0	B
SPRR2E	0	B
SPRR2G	0	B
SRPX	0	B
SSC5D	0	B
STC1	0	B
SULF2	0	B
SULT2B1	0	B
TAGLN	0	B
TEAD4	0	B
TFAP2A	0.0140473	B
TGFB1I1	0	B
TGFB3	0	B
TGFBI	0	B
TGM1	0	B
THBD	0	B
THBS1	0	B
THY1	0	B
TIMP2	0	B
TM4SF1	0.0211868	B
TMEM158	0.0209935	B
TMEM45A	0	B
TNC	0	B
TNFAIP6	0	B
TNFAIP8L3	0	B
TNNT1	0	B
TPM1	0	B
TPM2	0	B
TPX2	0	B
TREM1	0	B
TUBB6	0	B
TWIST1	0	B
UCHL1	0	B
VCAN	0	B
VIM	0	B
VSNL1	0	B
ZBED2	0	B
ZFP36	0	B
